# Supplementary material
Source: publisher figshare collection journal article supplement (https://acs.figshare.com/ndownloader/files/9112354)
Supplement: Supplementary file 1 [file 9112354]

data_llf20170412_0m_a
_audit_creation_date              2017-08-11
_audit_creation_method
;
Olex2 1.2
(compiled 2017.03.28 svn.r3405 for OlexSys, GUI svn.r5337)
;
_publ_contact_author_address      ?
_publ_contact_author_email        ?
_publ_contact_author_id_orcid     ?
_publ_contact_author_name         ''
_publ_contact_author_phone        ?
_publ_section_references
;
Dolomanov, O.V., Bourhis, L.J., Gildea, R.J, Howard, J.A.K. & Puschmann, H.
 (2009), J. Appl. Cryst. 42, 339-341.
;
_chemical_name_common             ?
_chemical_name_systematic
;
 ? 
;
_chemical_formula_moiety          'C24 H21 Br N2 O7 S'
_chemical_formula_sum             'C24 H21 Br N2 O7 S'
_chemical_formula_weight          561.40
_chemical_absolute_configuration  unk
_chemical_melting_point           ?
loop_
  _atom_type_symbol
  _atom_type_description
  _atom_type_scat_dispersion_real
  _atom_type_scat_dispersion_imag
  _atom_type_scat_source
 'C' 'C' 0.0033 0.0016 'International Tables Vol C Tables 4.2.6.8 and 6.1.1.4'
 'H' 'H' 0.0000 0.0000 'International Tables Vol C Tables 4.2.6.8 and 6.1.1.4'
 'N' 'N' 0.0061 0.0033 'International Tables Vol C Tables 4.2.6.8 and 6.1.1.4'
 'O' 'O' 0.0106 0.0060 'International Tables Vol C Tables 4.2.6.8 and 6.1.1.4'
 'Br' 'Br' -0.2901 2.4595
 'International Tables Vol C Tables 4.2.6.8 and 6.1.1.4'
 'S' 'S' 0.1246 0.1234 'International Tables Vol C Tables 4.2.6.8 and 6.1.1.4'

_space_group_crystal_system       'monoclinic'
_space_group_IT_number            4
_space_group_name_H-M_alt         'P 1 21 1'
_space_group_name_Hall            'P 2yb'
# h,k,l, Fc-squared, Fo-squared, sigma(Fo-squared) and status flag
loop_
  _space_group_symop_id
  _space_group_symop_operation_xyz
 1 'x, y, z'
 2 '-x, y+1/2, -z'

_cell_length_a                    7.7562(14)
_cell_length_b                    27.266(5)
_cell_length_c                    12.095(2)
_cell_angle_alpha                 90.00
_cell_angle_beta                  108.455(4)
_cell_angle_gamma                 90.00
_cell_volume                      2426.4(8)
_cell_formula_units_Z             4
_cell_measurement_reflns_used     2566
_cell_measurement_temperature     296(2)
_cell_measurement_theta_max       21.02
_cell_measurement_theta_min       2.32
_exptl_absorpt_coefficient_mu     1.828
_exptl_absorpt_correction_T_max   0.7344
_exptl_absorpt_correction_T_min   0.5671
_exptl_absorpt_correction_type    multi-scan
_exptl_absorpt_process_details    '(SADABS; Bruker, 2001)'
_exptl_crystal_colour             colorless
_exptl_crystal_density_diffrn     1.537
_exptl_crystal_density_meas       ?
_exptl_crystal_density_method     'not measured'
_exptl_crystal_description        rod
_exptl_crystal_F_000              1144
_exptl_crystal_size_max           0.35
_exptl_crystal_size_mid           0.21
_exptl_crystal_size_min           0.18
_exptl_special_details
;
 ? 
;
_diffrn_reflns_av_R_equivalents   0.0566
_diffrn_reflns_av_unetI/netI      0.1006
_diffrn_reflns_limit_h_max        9
_diffrn_reflns_limit_h_min        -9
_diffrn_reflns_limit_k_max        34
_diffrn_reflns_limit_k_min        -31
_diffrn_reflns_limit_l_max        14
_diffrn_reflns_limit_l_min        -15
_diffrn_reflns_number             15813
_diffrn_reflns_theta_full         26.37
_diffrn_reflns_theta_max          26.37
_diffrn_reflns_theta_min          1.49
_diffrn_ambient_temperature       296(2)
_diffrn_detector_area_resol_mean  ?
_diffrn_measured_fraction_theta_full 0.998
_diffrn_measured_fraction_theta_max 0.998
_diffrn_measurement_device_type
'Bruker APEX2 CCD area-detector diffractometer'
_diffrn_measurement_method        '\f and \w scans'
_diffrn_radiation_monochromator   graphite
_diffrn_radiation_type            MoK\a
_diffrn_radiation_wavelength      0.71073
_diffrn_source                    'fine-focus sealed tube'
_diffrn_standards_decay_%         ?
_diffrn_standards_interval_count  ?
_diffrn_standards_interval_time   ?
_diffrn_standards_number          ?
_reflns_number_gt                 6060
_reflns_number_total              9310
_reflns_threshold_expression      >2sigma(I)
_computing_cell_refinement        'Bruker SMART'
_computing_data_collection        'Bruker APEX2'
_computing_data_reduction         'Bruker SAINT'
_computing_molecular_graphics     'Olex2 (Dolomanov et al., 2009)'
_computing_publication_material   'Olex2 (Dolomanov et al., 2009)'
_computing_structure_refinement   'SHELXL-2013 (Sheldrick 2013)'
_computing_structure_solution     'SHELXS-97 (Sheldrick 2008)'
_refine_diff_density_max          1.075
_refine_diff_density_min          -0.469
_refine_diff_density_rms          0.101
_refine_ls_abs_structure_details  'Flack H D (1983), Acta Cryst. A39, 876-881'
_refine_ls_abs_structure_Flack    0.00
_refine_ls_extinction_coef        ?
_refine_ls_extinction_method      none
_refine_ls_goodness_of_fit_ref    0.998
_refine_ls_hydrogen_treatment     refall
_refine_ls_matrix_type            full
_refine_ls_number_parameters      631
_refine_ls_number_reflns          9310
_refine_ls_number_restraints      181
_refine_ls_R_factor_all           0.1209
_refine_ls_R_factor_gt            0.0749
_refine_ls_restrained_S_all       0.992
_refine_ls_shift/su_max           0.005
_refine_ls_shift/su_mean          0.001
_refine_ls_structure_factor_coef  Fsqd
_refine_ls_weighting_details
'calc w=1/[\s^2^(Fo^2^)+(0.0674P)^2^+7.4152P] where P=(Fo^2^+2Fc^2^)/3'
_refine_ls_weighting_scheme       calc
_refine_ls_wR_factor_gt           0.1699
_refine_ls_wR_factor_ref          0.1922
_refine_special_details
;
 Refinement of F^2^ against ALL reflections.  The weighted R-factor wR and 
 goodness of fit S are based on F^2^, conventional R-factors R are based 
 on F, with F set to zero for negative F^2^. The threshold expression of 
 F^2^ > 2sigma(F^2^) is used only for calculating R-factors(gt) etc. and is 
 not relevant to the choice of reflections for refinement.  R-factors based 
 on F^2^ are statistically about twice as large as those based on F, and R- 
 factors based on ALL data will be even larger. 
;
_olex2_refinement_description
;
;
_atom_sites_solution_hydrogens    geom
_atom_sites_solution_primary      direct
_atom_sites_solution_secondary    difmap
loop_
  _atom_site_label
  _atom_site_type_symbol
  _atom_site_fract_x
  _atom_site_fract_y
  _atom_site_fract_z
  _atom_site_U_iso_or_equiv
  _atom_site_adp_type
  _atom_site_occupancy
  _atom_site_calc_flag
  _atom_site_disorder_assembly
  _atom_site_disorder_group
  _atom_site_refinement_flags_posn
 Br2 Br 0.16172(13) 1.00738(4) 0.34755(9) 0.0523(3) Uani 1 d . . .
 Br1 Br 0.29511(16) 0.59140(5) 0.39436(13) 0.0797(5) Uani 1 d . . .
 S1 S 0.4169(4) 0.64020(10) -0.0992(2) 0.0517(7) Uani 1 d . . .
 S2 S 0.0701(4) 0.97102(13) 0.8736(2) 0.0641(8) Uani 1 d . . .
 O11 O 0.4732(9) 0.8961(2) 0.6135(5) 0.0376(14) Uani 1 d . . .
 O4 O -0.0013(8) 0.7127(2) 0.1515(5) 0.0330(13) Uani 1 d . . .
 O5 O 0.1297(11) 0.7513(3) 0.3212(6) 0.060(2) Uani 1 d . . .
 O12 O 0.3453(10) 0.8588(2) 0.4436(5) 0.0528(18) Uani 1 d . . .
 O3 O 0.3112(11) 0.6912(3) 0.0779(6) 0.059(2) Uani 1 d . . .
 N3 N 0.2162(10) 0.9907(3) 0.8079(6) 0.0436(19) Uani 1 d . . .
 C11 C 0.0830(12) 0.6672(3) 0.2036(7) 0.0302(17) Uani 1 d . . .
 H11 H 0.2082 0.6737 0.2527 0.036 Uiso 1 calc . . .
 N2 N -0.3208(13) 0.9245(3) 0.0021(9) 0.056(2) Uani 1 d . . .
 O10 O 0.1664(11) 0.9173(3) 0.6937(6) 0.063(2) Uani 1 d . . .
 O6 O -0.2830(14) 0.9626(3) 0.0582(9) 0.087(3) Uani 1 d . . .
 O1 O 0.4306(12) 0.5980(3) -0.1651(6) 0.072(2) Uani 1 d . . .
 O2 O 0.5739(11) 0.6615(3) -0.0171(7) 0.075(2) Uani 1 d . . .
 N1 N 0.2633(12) 0.6236(3) -0.0329(7) 0.0461(19) Uani 1 d . . .
 C44 C 0.5419(12) 0.8129(3) 0.5997(7) 0.0351(18) Uani 1 d . . .
 C37 C 0.4941(12) 0.9638(3) 0.4870(7) 0.0291(16) Uani 1 d . . .
 N4 N 0.7949(14) 0.6829(4) 0.7575(8) 0.060(2) Uani 1 d . . .
 C43 C 0.4450(13) 0.8576(3) 0.5419(7) 0.036(2) Uani 1 d . . .
 O7 O -0.4318(13) 0.9216(3) -0.0951(8) 0.080(2) Uani 1 d . . .
 C19 C -0.0653(12) 0.7963(3) 0.1641(7) 0.0320(17) Uani 1 d . . .
 O8 O -0.0925(11) 0.9525(3) 0.7922(7) 0.072(2) Uani 1 d . . .
 C50 C 0.6767(13) 0.8154(4) 0.7064(8) 0.042(2) Uani 1 d . . .
 H50 H 0.7083 0.8455 0.7433 0.050 Uiso 1 calc . . .
 C17 C 0.0541(11) 0.6109(3) 0.3677(7) 0.0311(18) Uani 1 d . . .
 C46 C 0.5741(14) 0.7253(4) 0.5984(9) 0.050(2) Uani 1 d . . .
 H46 H 0.5378 0.6951 0.5630 0.060 Uiso 1 calc . . .
 C18 C 0.0274(12) 0.7520(3) 0.2224(8) 0.0343(18) Uani 1 d . . .
 O9 O 0.0587(12) 1.0129(3) 0.9412(7) 0.086(3) Uani 1 d . . .
 C9 C 0.2270(13) 0.6526(3) 0.0485(8) 0.0362(19) Uani 1 d . . .
 C5 C 0.3039(14) 0.6864(4) -0.1984(8) 0.048(2) Uani 1 d . . .
 C36 C 0.3860(14) 0.9411(3) 0.5614(7) 0.0352(19) Uani 1 d . . .
 H36 H 0.2617 0.9340 0.5119 0.042 Uiso 1 calc . . .
 C7 C 0.2392(15) 0.7698(4) -0.2460(9) 0.054(2) Uani 1 d . . .
 H7 H 0.2548 0.8027 -0.2249 0.065 Uiso 1 calc . . .
 C14 C -0.2972(14) 0.6423(4) 0.3331(9) 0.050(2) Uani 1 d . . .
 H14 H -0.4166 0.6523 0.3203 0.060 Uiso 1 calc . . .
 C23 C -0.2354(13) 0.8798(4) 0.0609(9) 0.042(2) Uani 1 d . . .
 O13 O 0.7576(15) 0.6451(3) 0.7055(9) 0.092(3) Uani 1 d . . .
 C48 C 0.7059(14) 0.7289(4) 0.7016(8) 0.044(2) Uani 1 d . . .
 C45 C 0.4934(14) 0.7694(3) 0.5464(9) 0.048(2) Uani 1 d . . .
 H45 H 0.4048 0.7684 0.4736 0.058 Uiso 1 calc . . .
 C6 C 0.3255(16) 0.7356(4) -0.1683(9) 0.054(2) Uani 1 d . . .
 H6 H 0.3996 0.7449 -0.0946 0.065 Uiso 1 calc . . .
 C24 C -0.2853(13) 0.8360(3) 0.0037(8) 0.038(2) Uani 1 d . . .
 H24 H -0.3741 0.8348 -0.0690 0.046 Uiso 1 calc . . .
 C49 C 0.7638(14) 0.7737(4) 0.7580(8) 0.046(2) Uani 1 d . . .
 H49 H 0.8583 0.7750 0.8282 0.056 Uiso 1 calc . . .
 C25 C -0.1988(14) 0.7936(3) 0.0577(8) 0.041(2) Uani 1 d . . .
 H25 H -0.2315 0.7633 0.0218 0.050 Uiso 1 calc . . .
 O14 O 0.9078(14) 0.6871(3) 0.8548(8) 0.087(3) Uani 1 d . . .
 C10 C 0.0845(14) 0.6348(3) 0.1022(8) 0.042(2) Uani 1 d . . .
 H10A H 0.1114 0.6013 0.1291 0.050 Uiso 1 calc . . .
 H10B H -0.0345 0.6352 0.0436 0.050 Uiso 1 calc . . .
 C39 C 0.5099(12) 1.0143(3) 0.3276(7) 0.043(2) Uani 1 d . . .
 H39 H 0.4531 1.0366 0.2692 0.051 Uiso 1 calc . . .
 C16 C -0.0403(14) 0.5947(4) 0.4390(9) 0.051(2) Uani 1 d . . .
 H16 H 0.0138 0.5729 0.4992 0.062 Uiso 1 calc . . .
 C12 C -0.0260(12) 0.6457(3) 0.2786(7) 0.0381(19) Uani 1 d . . .
 C35 C 0.3808(13) 0.9736(3) 0.6613(8) 0.042(2) Uani 1 d . . .
 H35A H 0.3489 1.0067 0.6324 0.051 Uiso 1 calc . . .
 H35B H 0.5010 0.9747 0.7185 0.051 Uiso 1 calc . . .
 C29 C 0.2942(15) 0.9361(4) 1.0796(8) 0.049(2) Uani 1 d . . .
 H29 H 0.3124 0.9688 1.1025 0.059 Uiso 1 calc . . .
 C20 C -0.0161(14) 0.8416(3) 0.2182(8) 0.043(2) Uani 1 d . . .
 H20 H 0.0755 0.8433 0.2897 0.051 Uiso 1 calc . . .
 C8 C 0.1498(19) 0.5820(4) -0.0857(9) 0.067(3) Uani 1 d . . .
 H8A H 0.1995 0.5661 -0.1396 0.101 Uiso 1 calc . . .
 H8B H 0.0290 0.5933 -0.1264 0.101 Uiso 1 calc . . .
 H8C H 0.1458 0.5592 -0.0261 0.101 Uiso 1 calc . . .
 C13 C -0.2021(12) 0.6594(4) 0.2630(8) 0.043(2) Uani 1 d . . .
 H13 H -0.2589 0.6810 0.2030 0.052 Uiso 1 calc . . .
 C4 C 0.1971(18) 0.6732(4) -0.3110(9) 0.064(3) Uani 1 d . . .
 H4 H 0.1888 0.6407 -0.3349 0.077 Uiso 1 calc . . .
 C40 C 0.6947(14) 1.0016(5) 0.3522(9) 0.062(3) Uani 1 d . . .
 H40 H 0.7606 1.0132 0.3055 0.074 Uiso 1 calc . . .
 C3 C 0.1026(17) 0.7102(4) -0.3872(9) 0.063(3) Uani 1 d . . .
 H3 H 0.0218 0.7020 -0.4597 0.076 Uiso 1 calc . . .
 C41 C 0.7777(13) 0.9713(4) 0.4480(10) 0.059(3) Uani 1 d . . .
 H41 H 0.9002 0.9635 0.4659 0.070 Uiso 1 calc . . .
 C27 C 0.3532(15) 0.8516(4) 1.1214(9) 0.054(2) Uani 1 d . . .
 C26 C 0.4543(18) 0.8117(4) 1.2045(10) 0.067(3) Uani 1 d . . .
 H26A H 0.5331 0.8265 1.2743 0.100 Uiso 1 calc . . .
 H26B H 0.5252 0.7926 1.1680 0.100 Uiso 1 calc . . .
 H26C H 0.3684 0.7908 1.2239 0.100 Uiso 1 calc . . .
 C21 C -0.1019(14) 0.8838(4) 0.1670(9) 0.051(2) Uani 1 d . . .
 H21 H -0.0706 0.9141 0.2030 0.061 Uiso 1 calc . . .
 C42 C 0.6818(14) 0.9534(4) 0.5141(9) 0.051(2) Uani 1 d . . .
 H42 H 0.7393 0.9339 0.5784 0.062 Uiso 1 calc . . .
 C28 C 0.3834(16) 0.9000(4) 1.1547(9) 0.054(2) Uani 1 d . . .
 H28 H 0.4637 0.9081 1.2275 0.065 Uiso 1 calc . . .
 C32 C 0.2358(15) 0.8398(4) 1.0157(9) 0.055(2) Uani 1 d . . .
 H32 H 0.2145 0.8069 0.9960 0.066 Uiso 1 calc . . .
 C2 C 0.1297(15) 0.7578(4) -0.3544(10) 0.055(2) Uani 1 d . . .
 C34 C 0.2465(14) 0.9563(4) 0.7197(8) 0.047(2) Uani 1 d . . .
 C15 C -0.2171(14) 0.6108(4) 0.4213(8) 0.048(2) Uani 1 d . . .
 H15 H -0.2808 0.5998 0.4701 0.057 Uiso 1 calc . . .
 C30 C 0.1773(14) 0.9247(4) 0.9702(9) 0.051(2) Uani 1 d . . .
 C38 C 0.4189(12) 0.9923(3) 0.3937(8) 0.039(2) Uani 1 d . . .
 C31 C 0.1471(15) 0.8747(4) 0.9364(9) 0.054(2) Uani 1 d . . .
 H31 H 0.0700 0.8660 0.8631 0.065 Uiso 1 calc . . .
 C33 C 0.3374(18) 1.0290(3) 0.8504(9) 0.061(3) Uani 1 d . . .
 H33A H 0.2993 1.0475 0.9060 0.092 Uiso 1 calc . . .
 H33B H 0.3401 1.0499 0.7871 0.092 Uiso 1 calc . . .
 H33C H 0.4567 1.0159 0.8876 0.092 Uiso 1 calc . . .
 C1 C 0.026(2) 0.7980(5) -0.4427(11) 0.078(4) Uani 1 d . . .
 H1A H 0.0586 0.8299 -0.4090 0.117 Uiso 1 calc . . .
 H1B H -0.1030 0.7933 -0.4603 0.117 Uiso 1 calc . . .
 H1C H 0.0572 0.7955 -0.5131 0.117 Uiso 1 calc . . .

loop_
  _atom_site_aniso_label
  _atom_site_aniso_U_11
  _atom_site_aniso_U_22
  _atom_site_aniso_U_33
  _atom_site_aniso_U_23
  _atom_site_aniso_U_13
  _atom_site_aniso_U_12
 Br2 0.0442(5) 0.0587(6) 0.0540(6) 0.0155(5) 0.0153(4) 0.0118(5)
 Br1 0.0471(7) 0.0931(10) 0.1035(10) 0.0583(8) 0.0306(7) 0.0253(7)
 S1 0.0551(16) 0.0622(17) 0.0462(14) -0.0135(12) 0.0281(13) 0.0014(13)
 S2 0.0568(17) 0.093(2) 0.0485(16) -0.0027(15) 0.0245(14) 0.0276(16)
 O11 0.048(4) 0.029(3) 0.032(3) 0.001(2) 0.007(3) -0.003(3)
 O4 0.046(4) 0.029(3) 0.024(3) -0.001(2) 0.009(3) 0.004(3)
 O5 0.079(5) 0.049(4) 0.034(4) -0.008(3) -0.005(3) 0.007(4)
 O12 0.060(5) 0.048(4) 0.035(3) -0.006(3) -0.008(3) 0.002(3)
 O3 0.075(5) 0.054(4) 0.067(5) -0.019(4) 0.049(4) -0.018(4)
 N3 0.039(4) 0.068(5) 0.023(4) 0.002(3) 0.008(3) 0.009(3)
 C11 0.037(5) 0.033(4) 0.021(4) 0.003(3) 0.010(3) -0.002(4)
 N2 0.063(6) 0.042(4) 0.065(6) 0.011(4) 0.025(4) 0.012(4)
 O10 0.078(6) 0.064(5) 0.061(5) -0.017(4) 0.039(4) -0.021(4)
 O6 0.099(7) 0.033(4) 0.117(7) 0.009(4) 0.018(6) 0.012(4)
 O1 0.097(6) 0.067(5) 0.062(5) -0.016(4) 0.042(4) 0.015(5)
 O2 0.053(4) 0.106(7) 0.067(5) -0.017(4) 0.019(4) -0.004(4)
 N1 0.072(5) 0.032(4) 0.041(4) -0.002(3) 0.026(4) 0.001(4)
 C44 0.041(5) 0.037(4) 0.028(4) -0.003(3) 0.012(3) -0.002(4)
 C37 0.039(4) 0.019(4) 0.033(4) -0.005(3) 0.016(3) -0.001(3)
 N4 0.078(7) 0.058(5) 0.056(5) 0.017(4) 0.037(5) 0.024(5)
 C43 0.053(6) 0.028(4) 0.026(4) 0.003(3) 0.010(4) 0.002(4)
 O7 0.097(7) 0.074(6) 0.061(5) 0.024(4) 0.016(4) 0.033(5)
 C19 0.033(4) 0.030(4) 0.038(4) 0.003(3) 0.016(3) 0.000(3)
 O8 0.050(4) 0.103(6) 0.067(5) 0.008(4) 0.022(4) 0.012(4)
 C50 0.038(5) 0.046(5) 0.036(5) 0.001(4) 0.005(4) 0.007(4)
 C17 0.034(4) 0.035(5) 0.027(4) -0.007(3) 0.014(3) -0.002(3)
 C46 0.049(6) 0.038(5) 0.060(6) -0.005(4) 0.015(4) 0.001(4)
 C18 0.034(5) 0.028(4) 0.040(5) -0.002(3) 0.012(4) -0.006(4)
 O9 0.107(7) 0.088(6) 0.079(5) -0.010(5) 0.053(5) 0.038(5)
 C9 0.045(5) 0.031(5) 0.037(5) -0.002(4) 0.019(4) 0.000(4)
 C5 0.061(6) 0.054(5) 0.040(4) -0.008(4) 0.030(4) -0.016(4)
 C36 0.054(5) 0.025(4) 0.029(4) 0.004(3) 0.016(4) 0.003(4)
 C7 0.062(7) 0.057(6) 0.055(6) -0.014(4) 0.035(5) -0.011(5)
 C14 0.038(5) 0.058(6) 0.055(6) 0.003(5) 0.017(4) -0.003(4)
 C23 0.042(5) 0.037(4) 0.050(5) 0.004(4) 0.019(4) 0.008(4)
 O13 0.127(9) 0.050(5) 0.090(7) 0.012(4) 0.021(6) 0.025(5)
 C48 0.059(6) 0.046(4) 0.034(5) 0.010(4) 0.027(4) 0.010(4)
 C45 0.049(6) 0.034(4) 0.054(6) -0.001(4) 0.006(5) 0.002(4)
 C6 0.071(7) 0.055(5) 0.043(5) -0.022(4) 0.026(5) -0.019(5)
 C24 0.042(5) 0.040(4) 0.034(5) 0.002(3) 0.013(4) 0.005(4)
 C49 0.049(6) 0.052(5) 0.034(5) 0.001(4) 0.009(4) 0.005(4)
 C25 0.052(6) 0.036(4) 0.037(5) -0.001(4) 0.016(4) 0.006(4)
 O14 0.109(8) 0.071(6) 0.070(5) 0.036(4) 0.012(5) 0.027(5)
 C10 0.062(6) 0.029(4) 0.041(5) 0.000(4) 0.026(4) 0.000(4)
 C39 0.045(4) 0.037(5) 0.041(5) 0.007(4) 0.007(4) -0.016(4)
 C16 0.050(5) 0.058(6) 0.050(6) 0.011(5) 0.022(5) -0.013(5)
 C12 0.041(4) 0.043(5) 0.030(4) -0.003(3) 0.011(4) -0.005(4)
 C35 0.054(6) 0.038(5) 0.036(5) 0.007(4) 0.017(4) 0.012(4)
 C29 0.070(7) 0.040(5) 0.036(5) -0.012(4) 0.015(4) -0.016(5)
 C20 0.049(6) 0.033(4) 0.042(5) -0.001(4) 0.008(4) -0.004(4)
 C8 0.124(10) 0.026(5) 0.053(6) -0.011(4) 0.029(7) -0.015(6)
 C13 0.032(4) 0.049(6) 0.044(5) 0.009(4) 0.005(4) 0.001(4)
 C4 0.094(9) 0.048(6) 0.049(5) -0.017(4) 0.020(5) -0.022(6)
 C40 0.049(5) 0.087(8) 0.054(6) 0.013(5) 0.023(5) -0.018(6)
 C3 0.087(9) 0.065(6) 0.036(5) -0.011(4) 0.018(5) -0.030(6)
 C41 0.016(4) 0.084(8) 0.069(7) 0.009(5) 0.006(4) -0.003(5)
 C27 0.063(7) 0.054(5) 0.051(5) -0.002(4) 0.029(5) -0.009(5)
 C26 0.089(9) 0.062(6) 0.070(7) 0.012(5) 0.055(6) 0.003(6)
 C21 0.050(6) 0.040(5) 0.058(6) -0.015(4) 0.010(4) 0.004(4)
 C42 0.039(5) 0.070(7) 0.038(5) 0.016(5) 0.001(4) 0.000(5)
 C28 0.071(7) 0.057(5) 0.039(5) -0.001(4) 0.024(5) -0.014(5)
 C32 0.068(7) 0.053(5) 0.058(6) -0.021(4) 0.040(5) -0.024(5)
 C2 0.055(6) 0.068(6) 0.057(5) 0.001(5) 0.038(5) -0.002(5)
 C34 0.049(6) 0.054(6) 0.039(5) -0.002(4) 0.017(4) 0.014(4)
 C15 0.051(5) 0.055(6) 0.039(5) -0.003(4) 0.017(4) -0.011(5)
 C30 0.052(6) 0.066(5) 0.042(5) -0.009(4) 0.026(4) -0.007(5)
 C38 0.041(5) 0.033(5) 0.043(5) -0.003(3) 0.013(4) 0.000(4)
 C31 0.067(7) 0.068(5) 0.036(5) -0.023(4) 0.028(5) -0.019(5)
 C33 0.115(9) 0.017(4) 0.055(6) -0.001(4) 0.032(7) 0.020(4)
 C1 0.079(9) 0.082(8) 0.080(8) 0.025(7) 0.035(7) -0.006(6)

_geom_special_details
;
 All esds (except the esd in the dihedral angle between two l.s. planes) 
 are estimated using the full covariance matrix.  The cell esds are taken 
 into account individually in the estimation of esds in distances, angles 
 and torsion angles; correlations between esds in cell parameters are only 
 used when they are defined by crystal symmetry.  An approximate (isotropic) 
 treatment of cell esds is used for estimating esds involving l.s. planes. 
;
loop_
  _geom_bond_atom_site_label_1
  _geom_bond_atom_site_label_2
  _geom_bond_distance
  _geom_bond_site_symmetry_2
  _geom_bond_publ_flag
 Br2 C38 1.938(9) . ?
 Br1 C17 1.871(9) . ?
 S1 O1 1.423(7) . ?
 S1 O2 1.429(9) . ?
 S1 N1 1.695(9) . ?
 S1 C5 1.769(11) . ?
 S2 N3 1.666(8) . ?
 S2 O8 1.424(9) . ?
 S2 O9 1.423(8) . ?
 S2 C30 1.743(12) . ?
 O11 C43 1.335(10) . ?
 O11 C36 1.445(10) . ?
 O4 C11 1.448(10) . ?
 O4 C18 1.347(10) . ?
 O5 C18 1.207(11) . ?
 O12 C43 1.196(10) . ?
 O3 C9 1.230(10) . ?
 N3 C34 1.494(12) . ?
 N3 C33 1.389(13) . ?
 C11 H11 0.9800 . ?
 C11 C10 1.515(11) . ?
 C11 C12 1.539(11) . ?
 N2 O6 1.225(12) . ?
 N2 O7 1.221(12) . ?
 N2 C23 1.460(13) . ?
 O10 C34 1.220(12) . ?
 N1 C9 1.361(11) . ?
 N1 C8 1.452(13) . ?
 C44 C43 1.485(12) . ?
 C44 C50 1.381(12) . ?
 C44 C45 1.347(13) . ?
 C37 C36 1.541(12) . ?
 C37 C42 1.416(13) . ?
 C37 C38 1.341(12) . ?
 N4 O13 1.194(12) . ?
 N4 C48 1.487(13) . ?
 N4 O14 1.230(12) . ?
 C19 C18 1.467(12) . ?
 C19 C25 1.375(13) . ?
 C19 C20 1.395(12) . ?
 C50 H50 0.9300 . ?
 C50 C49 1.367(13) . ?
 C17 C16 1.370(12) . ?
 C17 C12 1.422(12) . ?
 C46 H46 0.9300 . ?
 C46 C48 1.344(14) . ?
 C46 C45 1.408(14) . ?
 C9 C10 1.528(13) . ?
 C5 C6 1.387(14) . ?
 C5 C4 1.398(14) . ?
 C36 H36 0.9800 . ?
 C36 C35 1.509(12) . ?
 C7 H7 0.9300 . ?
 C7 C6 1.342(16) . ?
 C7 C2 1.358(15) . ?
 C14 H14 0.9300 . ?
 C14 C13 1.369(13) . ?
 C14 C15 1.358(14) . ?
 C23 C24 1.371(13) . ?
 C23 C21 1.376(14) . ?
 C48 C49 1.401(14) . ?
 C45 H45 0.9300 . ?
 C6 H6 0.9300 . ?
 C24 H24 0.9300 . ?
 C24 C25 1.392(13) . ?
 C49 H49 0.9300 . ?
 C25 H25 0.9300 . ?
 C10 H10A 0.9700 . ?
 C10 H10B 0.9700 . ?
 C39 H39 0.9300 . ?
 C39 C40 1.412(14) . ?
 C39 C38 1.361(12) . ?
 C16 H16 0.9300 . ?
 C16 C15 1.390(14) . ?
 C12 C13 1.370(13) . ?
 C35 H35A 0.9700 . ?
 C35 H35B 0.9700 . ?
 C35 C34 1.508(13) . ?
 C29 H29 0.9300 . ?
 C29 C28 1.369(14) . ?
 C29 C30 1.382(14) . ?
 C20 H20 0.9300 . ?
 C20 C21 1.373(14) . ?
 C8 H8A 0.9600 . ?
 C8 H8B 0.9600 . ?
 C8 H8C 0.9600 . ?
 C13 H13 0.9300 . ?
 C4 H4 0.9300 . ?
 C4 C3 1.405(16) . ?
 C40 H40 0.9300 . ?
 C40 C41 1.402(15) . ?
 C3 H3 0.9300 . ?
 C3 C2 1.353(15) . ?
 C41 H41 0.9300 . ?
 C41 C42 1.345(14) . ?
 C27 C26 1.520(15) . ?
 C27 C28 1.380(14) . ?
 C27 C32 1.352(15) . ?
 C26 H26A 0.9600 . ?
 C26 H26B 0.9600 . ?
 C26 H26C 0.9600 . ?
 C21 H21 0.9300 . ?
 C42 H42 0.9300 . ?
 C28 H28 0.9300 . ?
 C32 H32 0.9300 . ?
 C32 C31 1.372(16) . ?
 C2 C1 1.566(17) . ?
 C15 H15 0.9300 . ?
 C30 C31 1.420(15) . ?
 C31 H31 0.9300 . ?
 C33 H33A 0.9600 . ?
 C33 H33B 0.9600 . ?
 C33 H33C 0.9600 . ?
 C1 H1A 0.9600 . ?
 C1 H1B 0.9600 . ?
 C1 H1C 0.9600 . ?

loop_
  _geom_angle_atom_site_label_1
  _geom_angle_atom_site_label_2
  _geom_angle_atom_site_label_3
  _geom_angle
  _geom_angle_site_symmetry_1
  _geom_angle_site_symmetry_3
  _geom_angle_publ_flag
 O1 S1 N1 103.7(5) . . ?
 O1 S1 C5 107.8(5) . . ?
 O2 S1 O1 121.4(5) . . ?
 O2 S1 N1 110.6(5) . . ?
 O2 S1 C5 108.2(5) . . ?
 N1 S1 C5 103.9(5) . . ?
 N3 S2 C30 107.5(4) . . ?
 O8 S2 N3 111.8(4) . . ?
 O8 S2 C30 109.6(5) . . ?
 O9 S2 N3 101.0(5) . . ?
 O9 S2 O8 118.7(5) . . ?
 O9 S2 C30 107.4(5) . . ?
 C43 O11 C36 115.2(6) . . ?
 C18 O4 C11 116.3(6) . . ?
 C34 N3 S2 115.0(7) . . ?
 C33 N3 S2 123.2(7) . . ?
 C33 N3 C34 119.7(8) . . ?
 O4 C11 H11 109.6 . . ?
 O4 C11 C10 105.4(6) . . ?
 O4 C11 C12 109.0(7) . . ?
 C10 C11 H11 109.6 . . ?
 C12 C11 H11 109.6 . . ?
 C12 C11 C10 113.6(7) . . ?
 O6 N2 C23 116.6(10) . . ?
 O7 N2 O6 124.1(10) . . ?
 O7 N2 C23 119.2(9) . . ?
 C9 N1 S1 121.6(6) . . ?
 C9 N1 C8 122.5(9) . . ?
 C8 N1 S1 114.8(7) . . ?
 C50 C44 C43 121.4(8) . . ?
 C45 C44 C43 118.4(8) . . ?
 C45 C44 C50 120.2(9) . . ?
 C42 C37 C36 119.5(8) . . ?
 C38 C37 C36 123.5(8) . . ?
 C38 C37 C42 116.9(8) . . ?
 O13 N4 C48 119.2(10) . . ?
 O13 N4 O14 124.3(10) . . ?
 O14 N4 C48 116.4(10) . . ?
 O11 C43 C44 112.7(7) . . ?
 O12 C43 O11 123.1(8) . . ?
 O12 C43 C44 124.2(8) . . ?
 C25 C19 C18 121.1(8) . . ?
 C25 C19 C20 119.9(8) . . ?
 C20 C19 C18 119.0(8) . . ?
 C44 C50 H50 119.8 . . ?
 C49 C50 C44 120.4(9) . . ?
 C49 C50 H50 119.8 . . ?
 C16 C17 Br1 120.2(7) . . ?
 C16 C17 C12 120.0(8) . . ?
 C12 C17 Br1 119.6(6) . . ?
 C48 C46 H46 121.5 . . ?
 C48 C46 C45 116.9(9) . . ?
 C45 C46 H46 121.5 . . ?
 O4 C18 C19 113.1(7) . . ?
 O5 C18 O4 122.9(8) . . ?
 O5 C18 C19 123.8(8) . . ?
 O3 C9 N1 119.6(8) . . ?
 O3 C9 C10 122.6(8) . . ?
 N1 C9 C10 117.7(8) . . ?
 C6 C5 S1 121.2(8) . . ?
 C6 C5 C4 119.3(11) . . ?
 C4 C5 S1 119.4(8) . . ?
 O11 C36 C37 109.3(7) . . ?
 O11 C36 H36 109.5 . . ?
 O11 C36 C35 106.1(7) . . ?
 C37 C36 H36 109.5 . . ?
 C35 C36 C37 112.9(7) . . ?
 C35 C36 H36 109.5 . . ?
 C6 C7 H7 119.1 . . ?
 C2 C7 H7 119.1 . . ?
 C2 C7 C6 121.9(11) . . ?
 C13 C14 H14 120.0 . . ?
 C13 C14 C15 120.0(10) . . ?
 C15 C14 H14 120.0 . . ?
 C24 C23 N2 117.9(9) . . ?
 C21 C23 N2 118.6(9) . . ?
 C21 C23 C24 123.3(9) . . ?
 C46 C48 N4 117.9(9) . . ?
 C46 C48 C49 123.3(9) . . ?
 C49 C48 N4 118.8(9) . . ?
 C44 C45 C46 121.4(9) . . ?
 C44 C45 H45 119.3 . . ?
 C46 C45 H45 119.3 . . ?
 C5 C6 H6 120.1 . . ?
 C7 C6 C5 119.8(10) . . ?
 C7 C6 H6 120.1 . . ?
 C23 C24 H24 121.0 . . ?
 C23 C24 C25 117.9(9) . . ?
 C25 C24 H24 121.0 . . ?
 C50 C49 C48 117.7(9) . . ?
 C50 C49 H49 121.1 . . ?
 C48 C49 H49 121.1 . . ?
 C19 C25 C24 120.3(9) . . ?
 C19 C25 H25 119.9 . . ?
 C24 C25 H25 119.9 . . ?
 C11 C10 H10A 109.6 . . ?
 C11 C10 H10B 109.6 . . ?
 C9 C10 C11 110.5(7) . . ?
 C9 C10 H10A 109.6 . . ?
 C9 C10 H10B 109.6 . . ?
 H10A C10 H10B 108.1 . . ?
 C40 C39 H39 121.7 . . ?
 C38 C39 H39 121.7 . . ?
 C38 C39 C40 116.6(9) . . ?
 C17 C16 H16 120.0 . . ?
 C17 C16 C15 119.9(10) . . ?
 C15 C16 H16 120.0 . . ?
 C17 C12 C11 120.7(8) . . ?
 C13 C12 C11 121.7(8) . . ?
 C13 C12 C17 117.6(8) . . ?
 C36 C35 H35A 109.0 . . ?
 C36 C35 H35B 109.0 . . ?
 C36 C35 C34 112.8(8) . . ?
 H35A C35 H35B 107.8 . . ?
 C34 C35 H35A 109.0 . . ?
 C34 C35 H35B 109.0 . . ?
 C28 C29 H29 119.6 . . ?
 C30 C29 H29 119.6 . . ?
 C30 C29 C28 120.9(9) . . ?
 C19 C20 H20 119.7 . . ?
 C21 C20 C19 120.6(9) . . ?
 C21 C20 H20 119.7 . . ?
 N1 C8 H8A 109.5 . . ?
 N1 C8 H8B 109.5 . . ?
 N1 C8 H8C 109.5 . . ?
 H8A C8 H8B 109.5 . . ?
 H8A C8 H8C 109.5 . . ?
 H8B C8 H8C 109.5 . . ?
 C14 C13 C12 122.1(9) . . ?
 C14 C13 H13 119.0 . . ?
 C12 C13 H13 119.0 . . ?
 C5 C4 H4 120.7 . . ?
 C3 C4 C5 118.7(10) . . ?
 C3 C4 H4 120.7 . . ?
 C39 C40 H40 120.3 . . ?
 C41 C40 C39 119.3(9) . . ?
 C41 C40 H40 120.3 . . ?
 C4 C3 H3 120.2 . . ?
 C2 C3 C4 119.6(10) . . ?
 C2 C3 H3 120.2 . . ?
 C40 C41 H41 119.7 . . ?
 C42 C41 C40 120.6(9) . . ?
 C42 C41 H41 119.7 . . ?
 C28 C27 C26 119.2(10) . . ?
 C32 C27 C26 120.6(10) . . ?
 C32 C27 C28 120.3(11) . . ?
 C27 C26 H26A 109.5 . . ?
 C27 C26 H26B 109.5 . . ?
 C27 C26 H26C 109.5 . . ?
 H26A C26 H26B 109.5 . . ?
 H26A C26 H26C 109.5 . . ?
 H26B C26 H26C 109.5 . . ?
 C23 C21 C20 117.9(9) . . ?
 C23 C21 H21 121.0 . . ?
 C20 C21 H21 121.0 . . ?
 C37 C42 H42 119.7 . . ?
 C41 C42 C37 120.7(9) . . ?
 C41 C42 H42 119.7 . . ?
 C29 C28 C27 119.4(10) . . ?
 C29 C28 H28 120.3 . . ?
 C27 C28 H28 120.3 . . ?
 C27 C32 H32 118.8 . . ?
 C27 C32 C31 122.3(10) . . ?
 C31 C32 H32 118.8 . . ?
 C7 C2 C3 120.5(11) . . ?
 C7 C2 C1 121.3(11) . . ?
 C3 C2 C1 118.2(11) . . ?
 N3 C34 C35 115.2(8) . . ?
 O10 C34 N3 123.3(9) . . ?
 O10 C34 C35 121.5(8) . . ?
 C14 C15 C16 120.3(10) . . ?
 C14 C15 H15 119.9 . . ?
 C16 C15 H15 119.9 . . ?
 C29 C30 S2 120.5(8) . . ?
 C29 C30 C31 119.4(10) . . ?
 C31 C30 S2 120.1(8) . . ?
 C37 C38 Br2 119.9(7) . . ?
 C37 C38 C39 125.5(9) . . ?
 C39 C38 Br2 114.5(7) . . ?
 C32 C31 C30 117.6(9) . . ?
 C32 C31 H31 121.2 . . ?
 C30 C31 H31 121.2 . . ?
 N3 C33 H33A 109.5 . . ?
 N3 C33 H33B 109.5 . . ?
 N3 C33 H33C 109.5 . . ?
 H33A C33 H33B 109.5 . . ?
 H33A C33 H33C 109.5 . . ?
 H33B C33 H33C 109.5 . . ?
 C2 C1 H1A 109.5 . . ?
 C2 C1 H1B 109.5 . . ?
 C2 C1 H1C 109.5 . . ?
 H1A C1 H1B 109.5 . . ?
 H1A C1 H1C 109.5 . . ?
 H1B C1 H1C 109.5 . . ?

loop_
  _geom_torsion_atom_site_label_1
  _geom_torsion_atom_site_label_2
  _geom_torsion_atom_site_label_3
  _geom_torsion_atom_site_label_4
  _geom_torsion
  _geom_torsion_site_symmetry_1
  _geom_torsion_site_symmetry_2
  _geom_torsion_site_symmetry_3
  _geom_torsion_site_symmetry_4
  _geom_torsion_publ_flag
 Br1 C17 C16 C15 177.6(7) . . . . ?
 Br1 C17 C12 C11 0.3(11) . . . . ?
 Br1 C17 C12 C13 -179.2(7) . . . . ?
 S1 N1 C9 O3 -2.3(13) . . . . ?
 S1 N1 C9 C10 179.2(7) . . . . ?
 S1 C5 C6 C7 179.4(8) . . . . ?
 S1 C5 C4 C3 177.5(9) . . . . ?
 S2 N3 C34 O10 2.6(13) . . . . ?
 S2 N3 C34 C35 -179.2(7) . . . . ?
 S2 C30 C31 C32 179.6(8) . . . . ?
 O11 C36 C35 C34 -71.5(10) . . . . ?
 O4 C11 C10 C9 73.1(9) . . . . ?
 O4 C11 C12 C17 -159.7(7) . . . . ?
 O4 C11 C12 C13 19.8(11) . . . . ?
 O3 C9 C10 C11 -7.4(13) . . . . ?
 N3 S2 C30 C29 82.4(9) . . . . ?
 N3 S2 C30 C31 -96.6(8) . . . . ?
 C11 O4 C18 O5 6.3(12) . . . . ?
 C11 O4 C18 C19 -178.8(7) . . . . ?
 C11 C12 C13 C14 -176.7(9) . . . . ?
 N2 C23 C24 C25 177.6(9) . . . . ?
 N2 C23 C21 C20 -176.6(9) . . . . ?
 O6 N2 C23 C24 175.3(10) . . . . ?
 O6 N2 C23 C21 -8.6(14) . . . . ?
 O1 S1 N1 C9 172.9(8) . . . . ?
 O1 S1 N1 C8 -19.0(9) . . . . ?
 O1 S1 C5 C6 -156.6(8) . . . . ?
 O1 S1 C5 C4 20.5(10) . . . . ?
 O2 S1 N1 C9 41.3(9) . . . . ?
 O2 S1 N1 C8 -150.6(8) . . . . ?
 O2 S1 C5 C6 -23.7(10) . . . . ?
 O2 S1 C5 C4 153.5(9) . . . . ?
 N1 S1 C5 C6 93.8(9) . . . . ?
 N1 S1 C5 C4 -89.0(9) . . . . ?
 N1 C9 C10 C11 171.1(8) . . . . ?
 C44 C50 C49 C48 -2.8(14) . . . . ?
 C37 C36 C35 C34 168.9(8) . . . . ?
 N4 C48 C49 C50 -178.3(9) . . . . ?
 C43 O11 C36 C37 -76.7(9) . . . . ?
 C43 O11 C36 C35 161.3(8) . . . . ?
 C43 C44 C50 C49 179.9(9) . . . . ?
 C43 C44 C45 C46 -177.3(9) . . . . ?
 O7 N2 C23 C24 -0.4(14) . . . . ?
 O7 N2 C23 C21 175.8(10) . . . . ?
 C19 C20 C21 C23 -0.7(15) . . . . ?
 O8 S2 N3 C34 -47.5(8) . . . . ?
 O8 S2 N3 C33 149.1(8) . . . . ?
 O8 S2 C30 C29 -155.8(8) . . . . ?
 O8 S2 C30 C31 25.2(9) . . . . ?
 C50 C44 C43 O11 -13.8(13) . . . . ?
 C50 C44 C43 O12 169.6(10) . . . . ?
 C50 C44 C45 C46 1.7(15) . . . . ?
 C17 C16 C15 C14 0.4(16) . . . . ?
 C17 C12 C13 C14 2.9(14) . . . . ?
 C46 C48 C49 C50 2.2(15) . . . . ?
 C18 O4 C11 C10 -161.7(7) . . . . ?
 C18 O4 C11 C12 76.0(9) . . . . ?
 C18 C19 C25 C24 -180.0(8) . . . . ?
 C18 C19 C20 C21 -179.0(9) . . . . ?
 O9 S2 N3 C34 -174.7(7) . . . . ?
 O9 S2 N3 C33 21.9(9) . . . . ?
 O9 S2 C30 C29 -25.6(10) . . . . ?
 O9 S2 C30 C31 155.4(8) . . . . ?
 C5 S1 N1 C9 -74.5(9) . . . . ?
 C5 S1 N1 C8 93.6(8) . . . . ?
 C5 C4 C3 C2 6.1(17) . . . . ?
 C36 O11 C43 O12 -4.8(13) . . . . ?
 C36 O11 C43 C44 178.5(7) . . . . ?
 C36 C37 C42 C41 177.6(9) . . . . ?
 C36 C37 C38 Br2 0.8(11) . . . . ?
 C36 C37 C38 C39 177.9(8) . . . . ?
 C36 C35 C34 N3 -171.7(8) . . . . ?
 C36 C35 C34 O10 6.5(14) . . . . ?
 C23 C24 C25 C19 -1.3(14) . . . . ?
 O13 N4 C48 C46 5.9(15) . . . . ?
 O13 N4 C48 C49 -173.6(11) . . . . ?
 C48 C46 C45 C44 -2.3(15) . . . . ?
 C45 C44 C43 O11 165.2(9) . . . . ?
 C45 C44 C43 O12 -11.4(14) . . . . ?
 C45 C44 C50 C49 0.9(15) . . . . ?
 C45 C46 C48 N4 -179.2(9) . . . . ?
 C45 C46 C48 C49 0.3(15) . . . . ?
 C6 C5 C4 C3 -5.2(16) . . . . ?
 C6 C7 C2 C3 0.8(17) . . . . ?
 C6 C7 C2 C1 178.2(10) . . . . ?
 C24 C23 C21 C20 -0.7(16) . . . . ?
 C25 C19 C18 O4 14.2(12) . . . . ?
 C25 C19 C18 O5 -171.0(9) . . . . ?
 C25 C19 C20 C21 1.0(14) . . . . ?
 O14 N4 C48 C46 -176.0(10) . . . . ?
 O14 N4 C48 C49 4.5(14) . . . . ?
 C10 C11 C12 C17 83.1(10) . . . . ?
 C10 C11 C12 C13 -97.4(10) . . . . ?
 C39 C40 C41 C42 1.7(19) . . . . ?
 C16 C17 C12 C11 175.5(8) . . . . ?
 C16 C17 C12 C13 -4.1(13) . . . . ?
 C12 C11 C10 C9 -167.6(7) . . . . ?
 C12 C17 C16 C15 2.5(14) . . . . ?
 C29 C30 C31 C32 0.5(14) . . . . ?
 C20 C19 C18 O4 -165.8(8) . . . . ?
 C20 C19 C18 O5 9.0(14) . . . . ?
 C20 C19 C25 C24 0.0(14) . . . . ?
 C8 N1 C9 O3 -169.5(10) . . . . ?
 C8 N1 C9 C10 12.0(14) . . . . ?
 C13 C14 C15 C16 -1.6(16) . . . . ?
 C4 C5 C6 C7 2.2(16) . . . . ?
 C4 C3 C2 C7 -3.9(17) . . . . ?
 C4 C3 C2 C1 178.6(11) . . . . ?
 C40 C39 C38 Br2 -175.5(8) . . . . ?
 C40 C39 C38 C37 7.3(14) . . . . ?
 C40 C41 C42 C37 1.4(18) . . . . ?
 C27 C32 C31 C30 -2.2(15) . . . . ?
 C26 C27 C28 C29 179.3(10) . . . . ?
 C26 C27 C32 C31 -177.5(9) . . . . ?
 C21 C23 C24 C25 1.7(15) . . . . ?
 C42 C37 C36 O11 -25.8(11) . . . . ?
 C42 C37 C36 C35 91.9(10) . . . . ?
 C42 C37 C38 Br2 178.6(7) . . . . ?
 C42 C37 C38 C39 -4.3(13) . . . . ?
 C28 C29 C30 S2 -177.9(8) . . . . ?
 C28 C29 C30 C31 1.2(15) . . . . ?
 C28 C27 C32 C31 2.1(17) . . . . ?
 C32 C27 C28 C29 -0.2(16) . . . . ?
 C2 C7 C6 C5 0.1(16) . . . . ?
 C15 C14 C13 C12 -0.1(16) . . . . ?
 C30 S2 N3 C34 72.9(7) . . . . ?
 C30 S2 N3 C33 -90.5(9) . . . . ?
 C30 C29 C28 C27 -1.3(16) . . . . ?
 C38 C37 C36 O11 151.9(8) . . . . ?
 C38 C37 C36 C35 -90.3(10) . . . . ?
 C38 C37 C42 C41 -0.4(15) . . . . ?
 C38 C39 C40 C41 -5.7(16) . . . . ?
 C33 N3 C34 O10 166.7(10) . . . . ?
 C33 N3 C34 C35 -15.0(12) . . . . ?

_olex2_submission_special_instructions 'No special instructions were received'
data_llf20170412_0m_a1
_shelx_title                      ' llf20170412_0m in P2'
_shelx_refln_list_code            4
_shelx_F_calc_maximum             265.05
_exptl_crystal_F_000              1144.00
_reflns_d_resolution_high         0.8000
loop_
  _symmetry_equiv_pos_as_xyz
 'x, y, z'
 '-x, y+1/2, -z'

_cell_length_a                    7.7562
_cell_length_b                    27.2660
_cell_length_c                    12.0954
_cell_angle_alpha                 90.000
_cell_angle_beta                  108.455
_cell_angle_gamma                 90.000
_shelx_F_squared_multiplier       1.000
loop_
  _refln_index_h
  _refln_index_k
  _refln_index_l
  _refln_F_squared_calc
  _refln_F_squared_meas
  _refln_F_squared_sigma
  _refln_observed_status
 3 -31 0 109.41 154.79 75.69 o
 3 -30 0 81.07 67.51 66.83 o
 4 -30 0 20.26 23.18 70.92 o
 3 -29 0 25.92 77.74 64.10 o
 4 -29 0 25.44 -21.14 66.83 o
 2 -28 0 157.24 241.39 61.37 o
 3 -28 0 87.40 67.51 61.37 o
 4 -28 0 36.59 -7.50 58.64 o
 5 -28 0 38.95 -50.46 64.78 o
 2 -27 0 41.44 111.15 51.14 o
 3 -27 0 443.10 433.62 75.69 o
 4 -27 0 21.06 -22.50 56.60 o
 5 -27 0 27.62 50.46 65.46 o
 1 -26 0 35.57 -8.86 40.91 o
 2 -26 0 139.80 72.96 49.10 o
 3 -26 0 208.64 242.75 62.73 o
 4 -26 0 37.76 51.82 53.87 o
 5 -26 0 50.71 81.83 64.78 o
 1 -25 0 143.47 210.70 49.10 o
 2 -25 0 133.40 85.24 46.37 o
 3 -25 0 50.51 132.97 53.87 o
 4 -25 0 173.63 128.88 57.96 o
 5 -25 0 150.27 148.65 69.55 o
 6 -25 0 28.38 89.33 75.01 o
 1 -24 0 1345.68 999.59 86.60 o
 2 -24 0 92.20 12.27 38.87 o
 3 -24 0 76.77 -21.82 45.00 o
 4 -24 0 2.40 -15.00 51.14 o
 5 -24 0 18.23 24.55 64.10 o
 6 -24 0 59.83 14.32 65.46 o
 1 -23 0 256.68 357.24 51.82 o
 2 -23 0 2188.54 2093.89 130.24 o
 3 -23 0 5.89 70.23 49.10 o
 4 -23 0 118.00 15.00 51.82 o
 5 -23 0 87.79 59.32 64.10 o
 6 -23 0 21.96 -60.01 60.01 o
 0 -22 0 1233.75 1304.32 83.19 o
 1 -22 0 814.98 906.17 73.64 o
 2 -22 0 456.08 471.80 64.78 o
 3 -22 0 85.11 81.83 48.41 o
 4 -22 0 14.12 49.78 51.82 o
 5 -22 0 106.91 7.50 60.69 o
 6 -22 0 153.69 218.21 79.78 o
 7 -22 0 187.74 229.80 79.78 o
 1 -21 0 192.16 204.57 40.91 o
 2 -21 0 1708.21 1480.25 105.69 o
 3 -21 0 17.96 43.64 43.64 o
 4 -21 0 206.64 295.94 66.14 o
 5 -21 0 46.89 49.78 64.10 o
 6 -21 0 60.64 100.92 64.78 o
 7 -21 0 36.96 2.73 61.37 o
 0 -20 0 740.98 671.60 55.23 o
 1 -20 0 209.76 225.00 35.80 o
 2 -20 0 376.09 369.52 53.87 o
 3 -20 0 986.85 1086.80 97.51 o
 4 -20 0 31.08 4.77 46.37 o
 5 -20 0 100.56 85.24 57.96 o
 6 -20 0 417.24 463.62 94.10 o
 7 -20 0 188.01 160.24 73.64 o
 1 -19 0 1780.66 1629.44 64.83 o
 2 -19 0 201.49 210.70 43.64 o
 3 -19 0 88.67 134.33 46.37 o
 4 -19 0 495.60 396.79 62.73 o
 5 -19 0 51.84 81.15 57.28 o
 6 -19 0 128.41 178.66 72.28 o
 7 -19 0 40.84 72.96 72.28 o
 0 -18 0 856.14 992.77 62.05 o
 1 -18 0 349.85 416.18 27.85 o
 2 -18 0 19.59 103.65 34.78 o
 3 -18 0 918.76 960.72 89.33 o
 4 -18 0 19.32 62.73 46.37 o
 5 -18 0 144.29 116.60 55.92 o
 6 -18 0 95.94 47.73 60.69 o
 7 -18 0 65.98 102.97 76.37 o
 1 -17 0 763.37 728.55 34.57 o
 2 -17 0 187.54 137.74 36.14 o
 3 -17 0 114.01 193.66 45.00 o
 4 -17 0 500.86 502.49 70.92 o
 5 -17 0 83.81 171.84 52.51 o
 6 -17 0 228.22 277.53 69.55 o
 7 -17 0 107.12 184.79 75.01 o
 0 -16 0 2139.85 2157.30 112.51 o
 1 -16 0 549.52 569.79 34.09 o
 2 -16 0 75.95 146.61 35.46 o
 3 -16 0 1407.67 1493.89 95.46 o
 4 -16 0 1163.60 1276.37 98.87 o
 5 -16 0 78.54 7.50 47.05 o
 6 -16 0 121.88 149.33 60.01 o
 7 -16 0 253.39 235.93 75.69 o
 8 -16 0 93.30 -4.09 74.33 o
 1 -15 0 788.27 715.49 33.42 o
 2 -15 0 603.49 576.13 57.96 o
 3 -15 0 426.10 493.62 58.64 o
 4 -15 0 130.85 132.29 42.96 o
 5 -15 0 659.91 637.50 83.87 o
 6 -15 0 213.90 146.61 57.28 o
 7 -15 0 285.41 189.57 77.74 o
 8 -15 0 152.20 175.25 74.33 o
 0 -14 0 3663.73 3420.71 169.79 o
 1 -14 0 87.31 260.53 18.92 o
 2 -14 0 601.65 582.95 56.60 o
 3 -14 0 213.09 300.03 49.10 o
 4 -14 0 183.48 265.94 52.51 o
 5 -14 0 990.22 966.86 98.19 o
 6 -14 0 175.42 115.92 57.96 o
 7 -14 0 472.43 574.09 98.19 o
 8 -14 0 130.80 112.51 77.74 o
 1 -13 0 2574.54 2807.36 94.75 o
 2 -13 0 842.85 696.14 57.96 o
 3 -13 0 68.70 214.80 40.23 o
 4 -13 0 1670.90 1632.31 112.51 o
 5 -13 0 662.81 646.37 79.10 o
 6 -13 0 174.75 165.02 60.01 o
 7 -13 0 129.44 173.88 66.14 o
 8 -13 0 10.04 -7.50 62.73 o
 0 -12 0 6104.56 5794.79 263.21 o
 1 -12 0 275.73 251.49 17.53 o
 2 -12 0 4229.71 4136.63 205.93 o
 3 -12 0 922.70 1110.67 78.42 o
 4 -12 0 188.10 189.57 44.32 o
 5 -12 0 184.95 312.99 60.01 o
 6 -12 0 1210.69 1227.27 103.65 o
 7 -12 0 608.46 583.63 94.78 o
 8 -12 0 49.28 67.51 75.01 o
 1 -11 0 1873.35 1994.54 68.63 o
 2 -11 0 10201.41 10641.21 503.85 o
 3 -11 0 1103.19 1018.00 77.05 o
 4 -11 0 4065.44 4000.25 207.98 o
 5 -11 0 414.01 508.62 65.46 o
 6 -11 0 478.09 463.62 72.96 o
 7 -11 0 59.42 83.87 58.64 o
 8 -11 0 2.35 2.73 64.78 o
 0 -10 0 2585.56 2706.84 128.88 o
 1 -10 0 949.96 1128.12 61.71 o
 2 -10 0 539.89 563.86 51.82 o
 3 -10 0 841.66 798.43 62.73 o
 4 -10 0 222.90 190.93 41.60 o
 5 -10 0 465.77 458.85 61.37 o
 6 -10 0 1114.06 1075.21 106.38 o
 7 -10 0 343.87 318.44 75.69 o
 8 -10 0 160.98 107.06 65.46 o
 1 -9 0 2179.68 2286.40 61.74 o
 2 -9 0 1588.73 1840.91 96.83 o
 3 -9 0 5896.78 6141.87 300.03 o
 4 -9 0 1124.12 1159.76 82.51 o
 5 -9 0 576.02 612.27 71.60 o
 6 -9 0 485.92 404.29 66.83 o
 7 -9 0 131.20 90.69 63.42 o
 8 -9 0 251.76 361.33 76.37 o
 0 -8 0 5048.78 5957.76 263.21 o
 1 -8 0 423.37 572.72 38.19 o
 2 -8 0 303.70 317.08 35.46 o
 3 -8 0 10171.13 9460.99 456.80 o
 4 -8 0 786.71 677.73 66.83 o
 5 -8 0 1812.29 1722.26 113.19 o
 6 -8 0 103.48 162.29 48.41 o
 7 -8 0 142.60 186.84 64.78 o
 8 -8 0 16.72 -8.86 57.96 o
 1 -7 0 19970.02 20039.53 919.12 o
 3 -7 0 64.55 105.01 27.28 o
 4 -7 0 57.46 124.79 34.78 o
 5 -7 0 710.17 781.38 77.05 o
 6 -7 0 720.02 742.51 81.83 o
 7 -7 0 654.59 723.42 92.06 o
 8 -7 0 158.29 220.25 68.19 o
 9 -7 0 19.87 -18.41 70.23 o
 0 -6 0 22076.56 23489.56 1048.61 o
 1 -6 0 636.27 707.74 42.28 o
 2 -6 0 196.33 272.76 31.37 o
 3 -6 0 2363.60 2188.67 117.29 o
 4 -6 0 958.12 856.39 68.87 o
 5 -6 0 1312.41 1429.11 99.56 o
 6 -6 0 691.59 642.27 73.64 o
 7 -6 0 146.64 160.93 60.69 o
 8 -6 0 86.60 155.47 66.83 o
 9 -6 0 2.41 49.10 68.87 o
 1 -5 0 8446.34 8456.01 403.61 o
 2 -5 0 1953.11 2309.37 120.01 o
 3 -5 0 849.47 844.80 62.05 o
 4 -5 0 223.96 306.17 45.69 o
 5 -5 0 114.65 102.28 40.91 o
 6 -5 0 288.44 312.99 55.92 o
 7 -5 0 27.82 42.28 49.10 o
 8 -5 0 457.57 567.27 86.60 o
 9 -5 0 47.30 -6.82 68.19 o
 0 -4 0 8782.21 10761.22 474.53 o
 1 -4 0 5056.08 5260.26 253.66 o
 2 -4 0 257.87 229.12 26.59 o
 3 -4 0 3483.40 3457.54 177.29 o
 4 -4 0 877.09 803.88 65.46 o
 5 -4 0 244.98 389.97 52.51 o
 6 -4 0 750.54 673.64 75.69 o
 7 -4 0 170.64 220.25 59.32 o
 8 -4 0 46.07 51.82 55.92 o
 9 -4 0 73.99 27.28 69.55 o
 1 -3 0 11953.86 12948.53 599.32 o
 2 -3 0 4913.55 5012.80 244.12 o
 5 -3 0 412.65 364.06 49.10 o
 6 -3 0 216.99 270.03 48.41 o
 7 -3 0 63.48 16.37 46.37 o
 8 -3 0 244.28 284.35 67.51 o
 9 -3 0 76.90 137.06 70.23 o
 0 -2 0 4832.05 5513.24 244.80 o
 1 -2 0 1718.36 1677.32 84.55 o
 2 -2 0 3965.91 4450.92 237.98 o
 3 -2 0 2032.85 2234.36 112.51 o
 4 -2 0 974.60 852.30 64.78 o
 5 -2 0 135.82 238.66 42.28 o
 6 -2 0 305.31 347.02 55.92 o
 7 -2 0 454.56 510.67 72.96 o
 8 -2 0 211.17 272.76 64.10 o
 9 -2 0 220.88 185.47 77.05 o
 1 -1 0 5488.89 5905.94 272.76 o
 2 -1 0 6232.67 6121.42 280.26 o
 3 -1 0 2903.23 2828.22 148.65 o
 4 -1 0 4960.75 5142.29 248.21 o
 5 -1 0 989.04 938.90 73.64 o
 6 -1 0 1113.81 1019.36 90.69 o
 7 -1 0 115.64 158.20 51.82 o
 8 -1 0 66.47 -46.37 46.37 o
 9 -1 0 114.83 86.60 72.28 o
 2 0 0 7566.19 8233.72 373.61 o
 4 0 0 508.28 623.18 55.23 o
 5 0 0 480.13 535.22 57.96 o
 6 0 0 47.20 137.74 40.23 o
 7 0 0 337.65 416.57 66.14 o
 8 0 0 404.50 347.70 72.96 o
 9 0 0 56.43 60.17 52.45 o
 1 1 0 5488.89 6166.42 271.39 o
 2 1 0 6232.66 6064.14 278.21 o
 3 1 0 2903.23 3182.73 147.97 o
 4 1 0 4960.75 5109.63 246.16 o
 5 1 0 989.04 1010.50 73.64 o
 6 1 0 1113.81 1104.53 85.24 o
 7 1 0 115.64 78.42 45.00 o
 8 1 0 66.47 10.91 51.82 o
 9 1 0 114.83 23.87 75.01 o
 0 2 0 4832.05 5434.82 244.12 o
 1 2 0 1718.35 1790.87 48.51 o
 2 2 0 3965.92 5807.06 235.93 o
 3 2 0 2032.85 2021.61 107.74 o
 4 2 0 974.60 1097.03 66.14 o
 5 2 0 135.82 148.65 33.41 o
 6 2 0 305.31 263.89 51.14 o
 7 2 0 454.56 395.43 62.05 o
 8 2 0 211.17 204.93 47.81 o
 9 2 0 220.88 115.24 82.51 o
 1 3 0 11953.86 13522.35 299.59 o
 2 3 0 4913.56 5378.16 257.41 o
 3 3 0 1020.36 1171.35 65.46 o
 5 3 0 412.65 296.62 42.28 o
 6 3 0 216.99 201.84 45.00 o
 7 3 0 63.48 99.15 39.55 o
 8 3 0 244.28 201.61 49.10 o
 9 3 0 76.90 76.37 74.33 o
 0 4 0 8782.21 10575.30 336.74 o
 1 4 0 5056.10 5696.71 179.13 o
 2 4 0 257.88 221.14 15.77 o
 3 4 0 3483.39 3671.13 185.10 o
 4 4 0 877.09 850.18 48.76 o
 5 4 0 244.98 347.35 33.23 o
 6 4 0 750.54 754.90 53.57 o
 7 4 0 170.64 139.13 45.69 o
 8 4 0 46.07 73.64 65.46 o
 9 4 0 73.99 363.38 96.83 o
 1 5 0 8446.34 9078.49 232.63 o
 2 5 0 1953.12 2404.00 71.36 o
 3 5 0 849.48 889.01 39.65 o
 4 5 0 223.96 323.36 27.61 o
 5 5 0 114.65 78.76 23.08 o
 6 5 0 288.44 349.39 38.28 o
 7 5 0 27.82 14.68 32.44 o
 8 5 0 457.57 690.69 105.01 o
 9 5 0 47.30 68.19 79.10 o
 0 6 0 22076.56 23656.94 744.35 o
 1 6 0 636.27 646.50 22.85 o
 2 6 0 196.33 189.26 20.82 o
 3 6 0 2363.61 2177.05 78.83 o
 4 6 0 958.13 820.59 73.99 o
 5 6 0 1312.41 1479.82 200.82 o
 6 6 0 691.59 643.71 48.45 o
 7 6 0 146.64 80.79 36.85 o
 8 6 0 86.60 203.20 75.01 o
 9 6 0 2.41 127.51 79.10 o
 1 7 0 19970.01 20781.25 650.39 o
 2 7 0 424.25 1064.98 64.10 o
 3 7 0 64.55 90.30 13.76 o
 4 7 0 57.46 136.44 27.62 o
 5 7 0 710.17 828.90 143.88 o
 6 7 0 720.03 795.65 53.71 o
 7 7 0 654.59 816.16 99.56 o
 8 7 0 158.29 101.60 70.23 o
 9 7 0 19.87 68.87 76.37 o
 0 8 0 5048.78 5695.19 187.56 o
 1 8 0 423.37 477.98 20.37 o
 2 8 0 303.70 286.65 24.11 o
 3 8 0 10171.13 10017.59 317.80 o
 4 8 0 786.72 596.57 35.29 o
 5 8 0 1812.29 1823.28 94.44 o
 6 8 0 103.48 201.59 36.48 o
 7 8 0 142.60 202.52 64.10 o
 8 8 0 16.72 76.37 64.78 o
 1 9 0 2179.69 2269.17 65.21 o
 2 9 0 1588.73 1646.07 67.02 o
 3 9 0 5896.79 6279.76 169.58 o
 4 9 0 1124.11 1047.51 48.95 o
 5 9 0 576.02 631.75 42.62 o
 6 9 0 485.92 355.88 65.46 o
 7 9 0 131.20 200.48 66.14 o
 8 9 0 251.76 197.07 78.42 o
 0 10 0 2585.56 2690.48 131.61 o
 1 10 0 949.96 1060.55 35.92 o
 2 10 0 539.89 580.71 35.59 o
 3 10 0 841.66 793.12 32.59 o
 4 10 0 222.90 305.07 40.91 o
 5 10 0 465.77 516.94 42.62 o
 6 10 0 1114.06 1242.27 110.47 o
 7 10 0 343.87 459.53 81.83 o
 8 10 0 160.98 119.33 68.19 o
 1 11 0 1873.35 1928.69 58.63 o
 2 11 0 10201.41 11108.43 389.67 o
 3 11 0 1103.20 1079.75 54.72 o
 4 11 0 4065.44 3999.68 138.25 o
 5 11 0 414.01 366.11 62.73 o
 6 11 0 478.09 627.95 82.51 o
 7 11 0 59.42 134.33 61.37 o
 8 11 0 2.35 5.46 62.05 o
 0 12 0 6104.56 5670.67 188.77 o
 1 12 0 275.72 296.34 18.79 o
 2 12 0 4229.70 4170.86 145.13 o
 3 12 0 922.70 987.44 53.49 o
 4 12 0 188.10 276.07 19.57 o
 5 12 0 184.95 175.25 53.19 o
 6 12 0 1210.69 1236.82 115.92 o
 7 12 0 608.46 617.73 92.74 o
 8 12 0 49.28 66.83 70.23 o
 1 13 0 2574.53 2707.17 79.91 o
 2 13 0 842.86 682.77 31.10 o
 3 13 0 68.70 195.16 27.37 o
 4 13 0 1670.89 1792.69 127.14 o
 5 13 0 662.81 611.59 77.74 o
 6 13 0 174.75 187.52 60.69 o
 7 13 0 129.44 137.06 64.78 o
 8 13 0 10.04 66.83 67.51 o
 0 14 0 3663.73 3666.20 124.40 o
 1 14 0 87.31 260.25 46.72 o
 2 14 0 601.64 544.01 51.58 o
 3 14 0 213.09 282.19 32.75 o
 4 14 0 183.48 220.30 48.76 o
 5 14 0 990.22 1069.75 101.60 o
 6 14 0 175.42 289.80 66.83 o
 7 14 0 472.43 434.98 82.51 o
 8 14 0 130.80 110.47 70.23 o
 1 15 0 788.27 738.84 31.63 o
 2 15 0 603.49 601.68 31.14 o
 3 15 0 426.09 372.10 36.86 o
 4 15 0 130.85 196.65 47.39 o
 5 15 0 659.91 812.07 87.96 o
 6 15 0 213.90 231.84 62.73 o
 7 15 0 285.41 389.97 78.42 o
 8 15 0 152.20 136.38 75.69 o
 0 16 0 2139.85 2251.36 84.61 o
 1 16 0 549.53 596.36 28.74 o
 2 16 0 75.94 115.69 22.93 o
 3 16 0 1407.67 1314.48 96.49 o
 4 16 0 1163.60 1124.34 67.99 o
 5 16 0 78.55 51.14 49.78 o
 6 16 0 121.88 220.25 66.14 o
 7 16 0 253.39 327.31 80.46 o
 8 16 0 93.30 165.70 79.10 o
 1 17 0 763.36 687.62 47.44 o
 2 17 0 187.54 161.48 20.11 o
 3 17 0 114.00 81.29 51.48 o
 4 17 0 500.86 477.30 49.12 o
 5 17 0 83.81 162.29 59.32 o
 6 17 0 228.22 358.61 72.28 o
 7 17 0 107.12 214.80 71.60 o
 0 18 0 856.14 924.67 48.94 o
 1 18 0 349.84 402.78 24.56 o
 2 18 0 19.59 89.18 18.64 o
 3 18 0 918.76 991.31 61.51 o
 4 18 0 19.32 43.98 32.31 o
 5 18 0 144.29 142.52 54.55 o
 6 18 0 95.94 116.60 63.42 o
 7 18 0 65.98 22.50 63.42 o
 1 19 0 1780.66 1678.40 51.07 o
 2 19 0 201.49 223.15 24.00 o
 3 19 0 88.67 130.54 32.52 o
 4 19 0 495.60 296.53 67.13 o
 5 19 0 51.84 92.74 54.55 o
 6 19 0 128.41 160.93 64.10 o
 7 19 0 40.84 32.73 66.83 o
 0 20 0 740.98 781.49 64.10 o
 1 20 0 209.77 270.55 22.83 o
 2 20 0 376.09 414.60 31.51 o
 3 20 0 986.84 1070.52 89.98 o
 4 20 0 31.08 99.08 35.64 o
 5 20 0 100.56 231.84 62.05 o
 6 20 0 417.23 404.29 79.10 o
 7 20 0 188.01 288.44 82.51 o
 1 21 0 192.16 179.61 20.99 o
 2 21 0 1708.21 1593.52 52.88 o
 3 21 0 17.96 -0.52 37.85 o
 4 21 0 206.64 146.18 71.26 o
 5 21 0 46.89 18.95 36.21 o
 6 21 0 60.64 90.69 64.78 o
 7 21 0 36.96 17.73 64.78 o
 0 22 0 1233.75 1225.89 64.61 o
 1 22 0 814.97 1016.21 57.44 o
 2 22 0 456.08 631.04 59.70 o
 3 22 0 85.11 87.54 43.98 o
 4 22 0 14.12 69.08 37.57 o
 5 22 0 106.91 62.43 45.35 o
 6 22 0 153.69 152.06 67.51 o
 7 22 0 187.74 197.07 75.69 o
 1 23 0 256.68 363.69 33.85 o
 2 23 0 2188.54 2080.87 95.16 o
 3 23 0 5.89 17.32 32.13 o
 4 23 0 118.00 150.65 43.15 o
 5 23 0 87.79 154.76 54.89 o
 6 23 0 21.97 58.64 63.42 o
 0 24 0 2133.91 2197.06 96.49 o
 1 24 0 1345.68 1276.14 48.40 o
 2 24 0 92.20 121.58 30.75 o
 3 24 0 76.77 129.25 36.14 o
 4 24 0 2.40 37.20 48.41 o
 5 24 0 18.23 48.47 50.80 o
 6 24 0 59.83 155.47 68.19 o
 1 25 0 143.47 168.09 31.32 o
 2 25 0 133.40 169.82 33.30 o
 3 25 0 50.50 98.84 33.14 o
 4 25 0 173.63 176.76 45.35 o
 5 25 0 150.27 173.16 119.33 o
 6 25 0 28.38 115.92 70.92 o
 0 26 0 176.31 140.11 35.64 o
 1 26 0 35.57 62.32 28.67 o
 2 26 0 139.80 175.96 34.34 o
 3 26 0 208.64 171.00 36.76 o
 4 26 0 37.76 -32.65 37.37 o
 5 26 0 50.71 82.28 46.86 o
 1 27 0 190.45 227.57 36.22 o
 2 27 0 41.44 99.63 33.15 o
 3 27 0 443.10 482.49 62.08 o
 4 27 0 21.06 -11.85 34.64 o
 5 27 0 27.62 8.21 61.71 o
 0 28 0 164.75 15.68 52.51 o
 1 28 0 93.02 99.88 33.59 o
 2 28 0 157.24 222.97 37.98 o
 3 28 0 87.40 5.91 40.61 o
 4 28 0 36.59 39.66 38.54 o
 5 28 0 38.95 24.35 48.41 o
 1 29 0 177.40 131.72 42.19 o
 2 29 0 17.65 -19.97 33.99 o
 3 29 0 25.92 8.54 34.90 o
 4 29 0 25.44 24.24 38.34 o
 0 30 0 15.82 46.37 55.92 o
 1 30 0 171.47 205.22 46.00 o
 2 30 0 16.67 82.15 46.04 o
 3 30 0 81.07 87.20 40.86 o
 4 30 0 20.26 48.82 41.01 o
 1 31 0 74.15 36.43 40.69 o
 2 31 0 39.30 34.06 36.80 o
 3 31 0 109.40 94.51 40.96 o
 0 32 0 9.36 40.23 63.42 o
 1 32 0 24.61 68.39 46.03 o
 2 32 0 12.63 0.11 45.80 o
 3 32 0 75.92 -1.62 40.91 o
 1 33 0 12.80 78.31 47.45 o
 2 33 0 11.46 45.40 78.76 o
 0 34 0 9.73 157.52 75.69 o
 3 -31 1 18.94 2.73 64.78 o
 -4 -30 1 1.65 81.83 64.78 o
 -3 -30 1 33.35 10.23 53.87 o
 3 -30 1 54.03 96.15 70.92 o
 4 -30 1 63.15 101.60 75.01 o
 -4 -29 1 58.86 85.92 62.73 o
 -3 -29 1 205.73 128.20 60.69 o
 2 -29 1 135.26 126.83 60.69 o
 3 -29 1 75.56 87.28 68.19 o
 4 -29 1 0.50 54.55 72.28 o
 -5 -28 1 123.69 78.42 72.96 o
 -4 -28 1 14.35 25.91 62.05 o
 -3 -28 1 114.27 100.24 57.28 o
 -2 -28 1 118.25 103.65 50.46 o
 2 -28 1 146.96 114.56 59.32 o
 3 -28 1 163.22 175.93 70.92 o
 4 -28 1 135.24 182.75 75.69 o
 5 -28 1 45.38 -55.92 73.64 o
 -5 -27 1 114.81 85.92 70.23 o
 -4 -27 1 112.01 150.70 70.23 o
 -3 -27 1 131.85 154.79 61.37 o
 -2 -27 1 129.58 126.15 51.82 o
 1 -27 1 45.52 49.78 47.73 o
 2 -27 1 89.18 108.42 55.92 o
 3 -27 1 11.82 -1.36 60.01 o
 4 -27 1 64.60 -0.68 68.19 o
 5 -27 1 105.75 108.42 83.19 o
 -6 -26 1 46.91 -2.73 65.46 o
 -5 -26 1 46.34 -57.96 57.96 o
 -4 -26 1 100.16 91.37 58.64 o
 -3 -26 1 252.02 235.93 60.01 o
 -2 -26 1 323.71 317.08 60.01 o
 1 -26 1 61.74 105.69 46.37 o
 2 -26 1 143.66 100.92 55.23 o
 3 -26 1 157.66 77.74 62.05 o
 4 -26 1 64.76 -56.60 61.37 o
 5 -26 1 14.09 -51.14 61.37 o
 -6 -25 1 80.75 109.10 79.10 o
 -5 -25 1 72.62 77.05 61.37 o
 -4 -25 1 162.85 141.83 57.96 o
 -3 -25 1 127.95 75.01 51.82 o
 -2 -25 1 202.65 144.56 48.41 o
 -1 -25 1 417.06 321.17 53.87 o
 1 -25 1 54.03 212.07 52.51 o
 2 -25 1 225.98 312.31 62.05 o
 3 -25 1 560.51 565.22 81.83 o
 4 -25 1 98.12 202.52 72.96 o
 5 -25 1 183.04 145.24 78.42 o
 6 -25 1 112.56 8.18 79.10 o
 -6 -24 1 193.27 392.02 93.42 o
 -5 -24 1 36.92 150.02 62.05 o
 -4 -24 1 176.14 235.93 62.05 o
 -3 -24 1 144.08 191.61 54.55 o
 -2 -24 1 269.62 356.56 57.96 o
 -1 -24 1 194.31 250.94 43.64 o
 0 -24 1 168.06 135.70 40.23 o
 1 -24 1 101.59 143.20 46.37 o
 2 -24 1 54.39 117.97 50.46 o
 3 -24 1 403.91 442.48 72.96 o
 4 -24 1 84.74 154.79 60.01 o
 5 -24 1 210.73 325.94 83.19 o
 6 -24 1 75.10 138.42 79.10 o
 -6 -23 1 17.42 145.93 70.23 o
 -5 -23 1 23.23 38.19 58.64 o
 -4 -23 1 182.20 284.35 68.87 o
 -3 -23 1 144.91 73.64 49.10 o
 -2 -23 1 91.04 61.37 41.60 o
 -1 -23 1 440.15 419.98 53.19 o
 0 -23 1 1503.49 1391.96 106.38 o
 1 -23 1 51.61 -29.32 36.82 o
 2 -23 1 90.67 83.19 45.69 o
 3 -23 1 817.73 608.18 79.10 o
 4 -23 1 204.08 250.25 72.28 o
 5 -23 1 104.10 177.97 71.60 o
 6 -23 1 8.15 53.19 77.05 o
 -7 -22 1 54.71 -17.05 72.28 o
 -6 -22 1 217.12 136.38 70.92 o
 -5 -22 1 182.59 134.33 66.14 o
 -4 -22 1 110.73 187.52 61.37 o
 -3 -22 1 8.53 44.32 43.64 o
 -2 -22 1 946.62 890.48 80.46 o
 -1 -22 1 683.66 591.81 60.69 o
 0 -22 1 939.40 906.56 77.74 o
 1 -22 1 579.82 661.37 67.51 o
 2 -22 1 112.87 82.51 42.28 o
 3 -22 1 209.85 225.02 60.01 o
 4 -22 1 310.26 310.94 69.55 o
 5 -22 1 264.87 156.15 62.73 o
 6 -22 1 152.35 171.84 79.78 o
 -7 -21 1 22.68 0.68 71.60 o
 -6 -21 1 25.21 86.60 68.19 o
 -5 -21 1 204.42 180.70 68.87 o
 -4 -21 1 794.71 700.92 84.55 o
 -3 -21 1 1599.90 1429.11 105.69 o
 -2 -21 1 272.98 200.48 46.37 o
 -1 -21 1 32.31 42.21 26.59 o
 0 -21 1 464.28 436.78 32.33 o
 1 -21 1 386.17 361.33 53.87 o
 2 -21 1 105.33 101.60 43.64 o
 3 -21 1 691.44 735.69 82.51 o
 4 -21 1 15.67 97.51 53.19 o
 5 -21 1 82.65 39.55 62.73 o
 6 -21 1 86.67 96.15 70.23 o
 7 -21 1 28.94 -60.69 74.33 o
 -7 -20 1 167.82 197.07 70.92 o
 -6 -20 1 76.77 36.14 59.32 o
 -5 -20 1 172.91 105.69 59.32 o
 -4 -20 1 95.77 135.01 53.87 o
 -3 -20 1 1678.23 1448.89 109.10 o
 -2 -20 1 665.89 603.41 66.14 o
 -1 -20 1 96.61 130.24 20.97 o
 0 -20 1 1802.45 1584.66 66.01 o
 1 -20 1 568.09 707.74 66.14 o
 2 -20 1 33.60 87.96 40.23 o
 3 -20 1 89.52 126.15 42.96 o
 4 -20 1 471.68 508.62 75.69 o
 5 -20 1 830.09 823.66 99.56 o
 6 -20 1 113.91 68.19 64.78 o
 7 -20 1 49.57 17.05 77.05 o
 -7 -19 1 136.13 108.42 70.23 o
 -6 -19 1 28.08 4.77 60.01 o
 -5 -19 1 161.04 193.66 57.28 o
 -4 -19 1 544.72 551.58 73.64 o
 -3 -19 1 412.08 463.62 64.10 o
 -2 -19 1 635.16 511.35 60.69 o
 -1 -19 1 499.70 576.54 57.62 o
 0 -19 1 1271.11 1280.74 55.83 o
 1 -19 1 295.19 320.39 28.30 o
 2 -19 1 1672.58 1694.37 110.47 o
 3 -19 1 213.29 205.25 53.19 o
 4 -19 1 7.60 73.64 52.51 o
 5 -19 1 103.82 131.61 61.37 o
 6 -19 1 617.59 558.40 89.33 o
 7 -19 1 42.15 85.92 77.74 o
 -7 -18 1 24.63 53.87 66.83 o
 -6 -18 1 0.51 36.82 58.64 o
 -5 -18 1 904.98 932.76 100.92 o
 -4 -18 1 460.79 464.30 68.87 o
 -3 -18 1 2312.38 1916.60 124.10 o
 -2 -18 1 353.34 336.85 50.46 o
 -1 -18 1 137.32 174.09 21.13 o
 0 -18 1 427.71 491.60 41.60 o
 1 -18 1 112.52 105.92 35.80 o
 2 -18 1 1643.22 1431.84 98.87 o
 3 -18 1 310.99 278.21 51.14 o
 4 -18 1 927.93 784.79 87.96 o
 5 -18 1 16.01 -18.41 47.05 o
 6 -18 1 142.45 173.20 66.14 o
 7 -18 1 15.44 4.77 66.14 o
 -8 -17 1 3.81 -40.23 76.37 o
 -7 -17 1 210.37 374.97 85.24 o
 -6 -17 1 49.11 14.32 50.46 o
 -5 -17 1 228.44 162.97 54.55 o
 -4 -17 1 273.26 259.12 60.01 o
 -3 -17 1 363.80 392.70 57.96 o
 -2 -17 1 114.90 107.06 36.82 o
 -1 -17 1 2085.53 1860.45 86.94 o
 0 -17 1 2262.03 2357.85 86.04 o
 1 -17 1 109.25 70.68 15.68 o
 2 -17 1 593.64 591.13 63.42 o
 3 -17 1 176.25 208.66 50.46 o
 4 -17 1 127.03 201.84 52.51 o
 5 -17 1 185.50 150.70 55.92 o
 6 -17 1 756.38 828.43 102.97 o
 7 -17 1 291.81 233.21 81.83 o
 -8 -16 1 5.43 80.46 78.42 o
 -7 -16 1 114.59 246.16 75.69 o
 -6 -16 1 235.46 267.98 71.60 o
 -5 -16 1 543.15 632.05 79.10 o
 -4 -16 1 148.18 167.75 52.51 o
 -3 -16 1 1925.97 1512.30 104.33 o
 -2 -16 1 1567.30 1335.01 87.28 o
 -1 -16 1 637.66 699.10 35.55 o
 1 -16 1 812.38 676.80 47.73 o
 2 -16 1 2092.38 2091.84 122.06 o
 3 -16 1 1486.78 1377.29 99.56 o
 4 -16 1 944.50 1049.98 97.51 o
 5 -16 1 485.13 514.76 74.33 o
 6 -16 1 284.14 412.48 80.46 o
 7 -16 1 41.94 -55.92 70.23 o
 -8 -15 1 12.88 -17.73 60.69 o
 -7 -15 1 67.23 -38.19 59.32 o
 -6 -15 1 226.23 235.25 66.83 o
 -5 -15 1 240.11 196.39 51.82 o
 -4 -15 1 1553.31 1515.71 111.15 o
 -3 -15 1 975.17 1000.95 79.10 o
 -2 -15 1 2080.05 2184.58 120.69 o
 -1 -15 1 2326.62 2175.04 99.90 o
 0 -15 1 2649.18 2645.13 97.51 o
 1 -15 1 654.70 677.12 31.38 o
 2 -15 1 998.19 919.12 71.60 o
 3 -15 1 2813.81 2554.78 143.88 o
 4 -15 1 224.94 171.84 53.19 o
 5 -15 1 394.10 285.03 66.14 o
 6 -15 1 130.93 141.83 68.19 o
 7 -15 1 6.98 -54.55 54.55 o
 8 -15 1 115.77 53.87 72.28 o
 -8 -14 1 196.80 248.89 81.15 o
 -7 -14 1 138.01 130.24 68.87 o
 -6 -14 1 436.30 586.36 82.51 o
 -5 -14 1 90.81 27.28 47.73 o
 -4 -14 1 41.24 34.09 36.14 o
 -3 -14 1 1661.53 1645.95 105.01 o
 -2 -14 1 1593.20 1658.23 97.51 o
 -1 -14 1 1249.70 1245.91 90.01 o
 0 -14 1 2167.76 2113.17 77.86 o
 1 -14 1 1497.04 1386.93 53.67 o
 2 -14 1 423.54 401.57 49.78 o
 3 -14 1 297.95 316.40 49.10 o
 4 -14 1 640.00 616.36 72.96 o
 5 -14 1 409.09 443.16 73.64 o
 6 -14 1 72.97 83.19 55.23 o
 7 -14 1 230.56 197.75 77.74 o
 8 -14 1 26.09 68.19 81.83 o
 -8 -13 1 60.18 72.96 73.64 o
 -7 -13 1 214.49 185.47 70.23 o
 -6 -13 1 1606.41 1633.68 124.10 o
 -5 -13 1 135.43 149.33 49.10 o
 -4 -13 1 1643.73 1198.63 94.78 o
 -3 -13 1 1925.64 2021.61 119.33 o
 -2 -13 1 1790.23 2102.07 112.51 o
 -1 -13 1 289.53 387.33 26.59 o
 0 -13 1 634.64 611.82 30.11 o
 1 -13 1 842.48 889.12 45.69 o
 2 -13 1 630.62 574.09 55.92 o
 3 -13 1 2163.25 2066.61 122.74 o
 4 -13 1 273.28 379.75 57.96 o
 5 -13 1 407.33 344.97 69.55 o
 6 -13 1 242.24 264.57 70.23 o
 7 -13 1 31.90 -19.09 56.60 o
 8 -13 1 64.18 119.33 78.42 o
 -8 -12 1 330.63 215.48 72.28 o
 -7 -12 1 208.98 115.92 58.64 o
 -6 -12 1 140.76 150.70 58.64 o
 -5 -12 1 149.64 160.93 49.10 o
 -4 -12 1 315.86 413.16 58.64 o
 -3 -12 1 210.34 499.08 55.92 o
 -2 -12 1 2693.54 2897.77 144.56 o
 -1 -12 1 1204.81 1039.07 55.92 o
 0 -12 1 2624.00 2639.33 132.29 o
 1 -12 1 7743.94 7086.88 231.12 o
 2 -12 1 533.58 561.81 52.51 o
 3 -12 1 29.56 83.19 32.05 o
 4 -12 1 26.05 26.59 39.55 o
 5 -12 1 136.13 96.83 49.10 o
 6 -12 1 86.48 74.33 51.82 o
 7 -12 1 251.17 278.89 80.46 o
 8 -12 1 74.87 2.05 63.42 o
 -8 -11 1 47.20 57.96 66.83 o
 -7 -11 1 32.49 45.69 56.60 o
 -6 -11 1 447.22 513.40 77.05 o
 -5 -11 1 78.71 92.74 47.05 o
 -4 -11 1 1118.25 1062.93 79.78 o
 -3 -11 1 1005.90 1082.71 76.37 o
 -2 -11 1 4096.71 3900.70 189.57 o
 -1 -11 1 807.53 832.52 47.05 o
 0 -11 1 1720.16 2010.70 96.83 o
 1 -11 1 6542.90 5786.68 271.39 o
 2 -11 1 1029.02 1150.90 70.23 o
 3 -11 1 2793.33 2427.95 138.42 o
 4 -11 1 200.03 243.44 50.46 o
 5 -11 1 1187.20 1311.82 105.69 o
 6 -11 1 159.75 174.56 62.73 o
 7 -11 1 48.72 70.23 66.83 o
 8 -11 1 41.70 -2.05 59.32 o
 -8 -10 1 657.52 690.69 96.15 o
 -7 -10 1 171.92 232.53 62.05 o
 -6 -10 1 162.24 145.24 55.92 o
 -5 -10 1 185.57 346.33 57.96 o
 -4 -10 1 305.48 299.35 50.46 o
 -3 -10 1 1467.85 1532.76 96.15 o
 -1 -10 1 1803.65 1698.46 77.05 o
 0 -10 1 4366.55 3980.48 183.43 o
 1 -10 1 4490.89 4225.28 202.52 o
 2 -10 1 1494.75 1447.52 87.28 o
 3 -10 1 287.70 278.89 42.96 o
 4 -10 1 1025.70 778.65 74.33 o
 5 -10 1 437.23 395.43 66.83 o
 6 -10 1 51.56 -39.55 51.14 o
 7 -10 1 636.40 804.56 104.33 o
 8 -10 1 77.18 11.59 59.32 o
 -9 -9 1 309.20 280.26 87.96 o
 -8 -9 1 7.08 -10.91 49.10 o
 -7 -9 1 141.96 160.24 62.05 o
 -6 -9 1 179.45 150.70 49.78 o
 -5 -9 1 2.06 45.69 40.91 o
 -4 -9 1 6646.69 6742.55 315.03 o
 -3 -9 1 389.62 396.11 49.10 o
 -2 -9 1 371.54 429.52 22.50 o
 -1 -9 1 1243.04 1193.86 58.64 o
 0 -9 1 1849.72 1928.19 94.10 o
 1 -9 1 4759.58 3930.02 195.02 o
 2 -9 1 1686.77 1896.14 94.10 o
 3 -9 1 1146.82 1377.97 83.87 o
 4 -9 1 20.84 92.06 34.78 o
 5 -9 1 311.13 254.35 51.14 o
 6 -9 1 32.16 110.47 55.92 o
 7 -9 1 11.18 23.87 61.37 o
 8 -9 1 133.82 55.23 66.14 o
 -9 -8 1 144.28 170.47 79.10 o
 -8 -8 1 589.66 675.01 97.51 o
 -7 -8 1 30.40 -12.96 47.05 o
 -6 -8 1 221.85 136.38 53.19 o
 -5 -8 1 556.54 447.25 60.69 o
 -4 -8 1 784.79 628.64 64.10 o
 -3 -8 1 1956.73 1838.49 67.61 o
 -2 -8 1 4827.86 4981.43 214.11 o
 -1 -8 1 4517.81 4020.71 184.11 o
 0 -8 1 7420.17 7170.71 317.76 o
 1 -8 1 992.33 1270.23 70.23 o
 2 -8 1 2576.72 2599.10 128.88 o
 3 -8 1 462.38 380.43 43.64 o
 4 -8 1 1155.75 904.12 75.69 o
 5 -8 1 909.24 923.21 85.24 o
 6 -8 1 1377.17 1350.01 115.92 o
 7 -8 1 297.66 368.84 77.74 o
 8 -8 1 41.99 151.38 74.33 o
 -9 -7 1 150.77 143.20 77.05 o
 -8 -7 1 371.71 494.99 82.51 o
 -7 -7 1 680.31 634.77 85.24 o
 -6 -7 1 116.40 146.61 49.10 o
 -5 -7 1 172.08 216.16 45.69 o
 -4 -7 1 135.86 195.02 42.96 o
 -3 -7 1 1981.74 1844.53 67.67 o
 -2 -7 1 1571.53 1718.16 75.01 o
 -1 -7 1 7384.30 7515.07 338.22 o
 0 -7 1 10204.48 9550.31 411.79 o
 1 -7 1 2822.31 2431.39 79.88 o
 2 -7 1 1311.89 1378.65 77.05 o
 3 -7 1 734.37 1129.76 68.19 o
 4 -7 1 624.27 838.66 66.14 o
 5 -7 1 234.30 269.35 52.51 o
 6 -7 1 1076.72 1023.38 102.28 o
 7 -7 1 370.91 406.34 75.01 o
 8 -7 1 74.59 135.01 72.96 o
 -9 -6 1 37.10 103.65 69.55 o
 -8 -6 1 187.42 205.93 64.78 o
 -7 -6 1 48.70 124.79 54.55 o
 -6 -6 1 1456.38 1362.97 106.38 o
 -5 -6 1 3647.03 3697.56 191.61 o
 -4 -6 1 562.89 596.59 60.69 o
 -3 -6 1 5064.04 4856.64 214.11 o
 -2 -6 1 2616.21 2321.64 100.24 o
 -1 -6 1 1296.68 1305.01 60.01 o
 0 -6 1 2460.59 2460.00 112.51 o
 2 -6 1 3128.50 2793.44 132.29 o
 3 -6 1 861.07 685.23 53.19 o
 4 -6 1 5241.14 4877.78 246.16 o
 5 -6 1 194.00 174.56 47.73 o
 6 -6 1 461.60 565.22 70.92 o
 7 -6 1 6.61 10.23 52.51 o
 8 -6 1 1.76 -59.32 59.32 o
 -9 -5 1 327.12 227.07 76.37 o
 -8 -5 1 83.04 135.70 59.32 o
 -7 -5 1 1138.88 1272.96 112.51 o
 -6 -5 1 132.89 114.56 49.10 o
 -5 -5 1 2118.02 1798.63 114.56 o
 -4 -5 1 125.97 130.92 36.82 o
 -3 -5 1 6185.87 6006.86 264.57 o
 -2 -5 1 2464.14 2440.90 107.06 o
 -1 -5 1 1101.12 1420.25 66.83 o
 0 -5 1 14220.24 11665.34 536.58 o
 1 -5 1 4833.39 4236.19 177.97 o
 2 -5 1 664.80 828.43 49.78 o
 3 -5 1 146.16 159.56 29.32 o
 5 -5 1 187.07 147.97 43.64 o
 6 -5 1 1341.92 1335.01 106.38 o
 7 -5 1 484.41 391.34 75.01 o
 8 -5 1 722.08 672.96 101.60 o
 -9 -4 1 41.32 -19.09 59.32 o
 -8 -4 1 320.61 482.71 77.74 o
 -7 -4 1 22.62 25.91 45.69 o
 -6 -4 1 91.36 218.89 52.51 o
 -5 -4 1 2349.04 2293.68 130.24 o
 -4 -4 1 1059.71 1215.00 79.78 o
 -3 -4 1 15332.31 13500.11 579.54 o
 -2 -4 1 3400.50 3034.15 130.24 o
 -1 -4 1 2667.14 2276.63 103.65 o
 0 -4 1 13505.48 10090.30 462.94 o
 1 -4 1 2950.42 2607.28 118.65 o
 2 -4 1 3291.53 3131.59 143.88 o
 3 -4 1 1632.89 1411.38 80.46 o
 4 -4 1 7141.58 6353.94 316.40 o
 5 -4 1 408.03 409.75 57.96 o
 6 -4 1 56.61 195.70 49.10 o
 7 -4 1 620.58 589.09 85.92 o
 8 -4 1 427.55 575.45 96.15 o
 -9 -3 1 8.98 30.69 60.01 o
 -8 -3 1 43.08 55.23 53.19 o
 -7 -3 1 557.28 645.00 79.78 o
 -6 -3 1 1359.16 1325.46 98.19 o
 -5 -3 1 1909.00 1926.82 115.24 o
 -4 -3 1 3288.61 3287.06 166.38 o
 -3 -3 1 1565.16 1590.04 85.92 o
 -2 -3 1 29450.03 28098.68 1179.54 o
 -1 -3 1 747.66 1114.76 57.28 o
 0 -3 1 763.69 461.57 26.59 o
 1 -3 1 3681.87 3113.18 132.97 o
 2 -3 1 1987.78 1780.90 93.42 o
 3 -3 1 5621.69 5027.80 248.89 o
 4 -3 1 1302.93 1239.54 81.83 o
 5 -3 1 1626.02 1471.39 102.97 o
 6 -3 1 1791.21 1587.99 112.51 o
 7 -3 1 54.96 25.91 52.51 o
 8 -3 1 185.40 225.71 72.96 o
 -9 -2 1 48.47 49.78 60.01 o
 -8 -2 1 370.28 311.62 69.55 o
 -7 -2 1 18.11 51.14 45.00 o
 -6 -2 1 1130.65 1029.52 94.10 o
 -5 -2 1 2527.33 2379.60 137.06 o
 -4 -2 1 691.56 590.45 57.28 o
 -3 -2 1 2719.26 2633.88 128.88 o
 -2 -2 1 29846.59 30176.88 1294.78 o
 -1 -2 1 1393.50 1164.54 52.51 o
 0 -2 1 2793.98 1883.83 60.98 o
 1 -2 1 8006.27 6556.40 282.30 o
 2 -2 1 682.73 579.54 41.60 o
 4 -2 1 1738.11 1645.95 99.56 o
 5 -2 1 415.27 361.33 53.19 o
 6 -2 1 12.89 50.46 38.87 o
 7 -2 1 339.45 349.74 68.87 o
 8 -2 1 171.02 192.29 70.23 o
 -9 -1 1 18.03 -6.82 55.23 o
 -8 -1 1 70.21 165.02 56.60 o
 -7 -1 1 106.92 53.19 46.37 o
 -6 -1 1 699.23 745.92 75.69 o
 -5 -1 1 269.03 329.35 47.73 o
 -4 -1 1 8077.88 7579.85 363.38 o
 -3 -1 1 4383.98 3873.42 184.79 o
 -2 -1 1 3128.04 3034.15 144.56 o
 -1 -1 1 3664.17 3013.69 141.83 o
 0 -1 1 972.90 597.95 31.37 o
 1 -1 1 6641.58 4742.09 219.57 o
 3 -1 1 7234.24 6591.17 301.40 o
 5 -1 1 1284.30 1103.17 81.15 o
 6 -1 1 436.33 467.71 63.42 o
 7 -1 1 158.00 172.52 56.60 o
 8 -1 1 4.55 -6.14 57.28 o
 -9 0 1 43.34 53.87 59.32 o
 -8 0 1 236.61 203.20 58.64 o
 -7 0 1 4.28 -21.82 40.23 o
 -6 0 1 4152.63 3830.46 202.52 o
 -5 0 1 76.37 65.46 31.37 o
 -4 0 1 9.76 29.32 23.87 o
 -3 0 1 412.68 415.89 34.78 o
 -2 0 1 54.74 122.74 18.41 o
 -1 0 1 3986.51 3090.68 141.83 o
 0 0 1 291.09 203.89 12.27 o
 3 0 1 792.22 780.70 53.19 o
 5 0 1 2074.79 1840.22 110.47 o
 6 0 1 101.92 84.55 43.64 o
 7 0 1 418.93 417.93 71.60 o
 8 0 1 97.30 84.55 62.73 o
 -9 1 1 18.03 -8.86 71.60 o
 -8 1 1 70.21 96.83 53.87 o
 -7 1 1 106.92 -38.19 38.19 o
 -6 1 1 699.23 908.89 80.46 o
 -5 1 1 269.03 224.34 42.28 o
 -4 1 1 8077.88 7933.00 362.70 o
 -3 1 1 4383.97 3933.43 186.16 o
 -2 1 1 3128.04 3120.00 146.61 o
 -1 1 1 3664.17 3071.09 100.77 o
 0 1 1 972.90 584.70 17.69 o
 1 1 1 6641.59 4819.82 218.21 o
 3 1 1 7234.24 6271.43 298.67 o
 5 1 1 1284.30 1092.94 77.74 o
 6 1 1 436.33 426.11 62.73 o
 7 1 1 158.00 60.69 51.14 o
 8 1 1 4.55 92.35 46.17 o
 -9 2 1 48.47 2.05 72.96 o
 -8 2 1 370.28 464.98 75.01 o
 -7 2 1 18.11 -27.96 36.14 o
 -6 2 1 1130.65 1100.44 84.55 o
 -5 2 1 2527.33 2470.22 132.29 o
 -4 2 1 691.56 715.24 53.19 o
 -3 2 1 2719.27 2625.70 130.92 o
 -2 2 1 29846.60 28019.58 1296.82 o
 -1 2 1 1393.49 1055.48 31.23 o
 0 2 1 2793.97 1843.11 43.29 o
 1 2 1 8006.27 5990.19 198.65 o
 2 2 1 682.73 609.54 38.87 o
 4 2 1 1738.11 1703.91 95.46 o
 5 2 1 415.27 389.29 50.46 o
 6 2 1 12.89 26.59 38.87 o
 7 2 1 339.45 407.66 69.52 o
 8 2 1 171.02 134.71 47.86 o
 -9 3 1 8.98 43.64 73.64 o
 -8 3 1 43.08 12.47 37.49 o
 -7 3 1 557.28 678.41 72.96 o
 -6 3 1 1359.16 1191.13 86.60 o
 -5 3 1 1909.00 1790.45 106.38 o
 -4 3 1 3288.61 3138.41 159.56 o
 -3 3 1 1565.16 1799.31 92.06 o
 -2 3 1 29450.04 25752.14 965.46 o
 -1 3 1 747.66 1274.73 59.67 o
 0 3 1 763.69 454.42 13.06 o
 1 3 1 3681.87 2628.73 227.04 o
 2 3 1 1987.78 1796.76 74.33 o
 3 3 1 5621.69 5415.73 245.48 o
 4 3 1 1302.93 1198.63 74.33 o
 5 3 1 1626.02 1625.50 96.83 o
 6 3 1 1791.21 1602.43 81.14 o
 7 3 1 54.96 29.65 36.79 o
 8 3 1 185.40 105.69 72.96 o
 -9 4 1 41.32 121.38 75.69 o
 -8 4 1 320.61 413.48 117.25 o
 -7 4 1 22.62 20.65 30.60 o
 -6 4 1 91.37 98.36 28.18 o
 -5 4 1 2349.04 2083.66 119.33 o
 -4 4 1 1059.72 1262.05 74.33 o
 -3 4 1 15332.29 12573.39 609.24 o
 -2 4 1 3400.51 2715.90 164.79 o
 -1 4 1 2667.14 2257.47 62.07 o
 0 4 1 13505.50 10426.58 231.71 o
 1 4 1 2950.41 2359.08 81.64 o
 2 4 1 3291.53 2792.96 102.97 o
 3 4 1 1632.89 1346.49 56.60 o
 4 4 1 7141.58 6759.56 224.36 o
 5 4 1 408.03 443.21 39.90 o
 6 4 1 56.61 64.64 107.40 o
 7 4 1 620.58 634.04 59.02 o
 8 4 1 427.55 522.94 95.46 o
 -9 5 1 327.12 423.39 96.15 o
 -8 5 1 83.04 83.19 64.78 o
 -7 5 1 1138.88 1126.55 69.29 o
 -6 5 1 132.89 145.81 31.37 o
 -5 5 1 2118.02 1897.82 83.53 o
 -4 5 1 125.98 106.85 19.33 o
 -3 5 1 6185.84 5613.86 192.39 o
 -2 5 1 2464.15 2228.68 76.93 o
 -1 5 1 1101.11 1428.92 48.10 o
 0 5 1 14220.26 12077.53 268.36 o
 1 5 1 4833.39 3650.71 87.59 o
 2 5 1 664.80 627.30 38.53 o
 3 5 1 146.16 167.52 19.14 o
 4 5 1 329.67 321.51 80.77 o
 5 5 1 187.07 161.27 42.96 o
 6 5 1 1341.92 1395.01 73.95 o
 7 5 1 484.41 534.82 55.85 o
 8 5 1 722.08 719.33 111.83 o
 -9 6 1 37.10 98.19 77.05 o
 -8 6 1 187.42 133.65 70.23 o
 -7 6 1 48.70 50.31 31.79 o
 -6 6 1 1456.38 1359.61 68.41 o
 -5 6 1 3647.04 3476.04 129.86 o
 -4 6 1 562.89 479.18 33.91 o
 -3 6 1 5064.04 4529.14 204.53 o
 -2 6 1 2616.21 2074.63 81.37 o
 -1 6 1 1296.69 1254.91 31.92 o
 0 6 1 2460.59 2343.07 61.11 o
 1 6 1 179.00 171.64 9.34 o
 2 6 1 3128.50 2537.60 90.34 o
 3 6 1 861.06 687.81 36.46 o
 4 6 1 5241.15 5030.87 172.64 o
 5 6 1 194.00 205.06 30.60 o
 6 6 1 461.60 451.46 45.86 o
 7 6 1 6.61 -10.91 58.64 o
 8 6 1 1.76 124.79 74.33 o
 -9 7 1 150.77 249.57 87.28 o
 -8 7 1 371.71 360.65 83.87 o
 -7 7 1 680.31 717.96 88.65 o
 -6 7 1 116.40 109.02 27.57 o
 -5 7 1 172.08 172.44 26.24 o
 -4 7 1 135.86 196.99 21.82 o
 -3 7 1 1981.73 1857.07 86.18 o
 -2 7 1 1571.54 1510.55 79.63 o
 -1 7 1 7384.29 7567.77 171.21 o
 0 7 1 10204.49 9026.02 205.80 o
 1 7 1 2822.32 2317.08 57.25 o
 2 7 1 1311.89 1296.34 62.89 o
 3 7 1 734.37 916.03 43.39 o
 4 7 1 624.27 575.61 38.71 o
 5 7 1 234.30 278.44 31.78 o
 6 7 1 1076.72 1128.38 66.00 o
 7 7 1 370.91 248.21 73.64 o
 8 7 1 74.59 23.87 66.83 o
 -9 8 1 144.28 232.53 87.28 o
 -8 8 1 589.66 670.91 98.19 o
 -7 8 1 30.40 15.68 52.51 o
 -6 8 1 221.85 189.00 29.84 o
 -5 8 1 556.54 528.09 37.34 o
 -4 8 1 784.79 695.46 73.99 o
 -3 8 1 1956.73 1817.51 60.10 o
 -2 8 1 4827.86 4677.39 151.26 o
 -1 8 1 4517.83 4044.78 84.63 o
 0 8 1 7420.18 6930.62 158.86 o
 1 8 1 992.32 1291.14 34.23 o
 2 8 1 2576.72 2462.22 101.60 o
 3 8 1 462.38 361.77 24.78 o
 4 8 1 1155.76 963.68 47.96 o
 5 8 1 909.24 919.05 53.08 o
 6 8 1 1377.17 1245.28 128.54 o
 7 8 1 297.66 407.02 81.83 o
 8 8 1 41.99 36.82 72.28 o
 -9 9 1 309.20 443.16 96.83 o
 -8 9 1 7.08 34.78 62.73 o
 -7 9 1 141.96 51.82 57.28 o
 -6 9 1 179.45 201.56 54.21 o
 -5 9 1 2.06 10.96 18.33 o
 -4 9 1 6646.66 6251.41 212.66 o
 -3 9 1 389.62 459.23 22.89 o
 -2 9 1 371.54 430.95 46.95 o
 -1 9 1 1243.05 1152.21 28.39 o
 0 9 1 1849.73 1863.40 47.02 o
 1 9 1 4759.58 4133.23 96.48 o
 2 9 1 1686.76 1625.20 82.53 o
 3 9 1 1146.82 1297.14 53.36 o
 4 9 1 20.84 27.98 30.34 o
 5 9 1 311.13 266.49 41.25 o
 6 9 1 32.16 20.46 51.82 o
 7 9 1 11.18 -51.14 55.23 o
 8 9 1 133.82 127.51 76.37 o
 -8 10 1 657.52 576.81 96.83 o
 -7 10 1 171.92 165.70 62.05 o
 -6 10 1 162.23 146.61 51.14 o
 -5 10 1 185.57 130.70 22.50 o
 -4 10 1 305.48 300.90 26.25 o
 -3 10 1 1467.84 1535.31 48.97 o
 -2 10 1 392.75 421.60 28.19 o
 -1 10 1 1803.65 1531.26 36.77 o
 0 10 1 4366.56 3877.19 92.03 o
 1 10 1 4490.90 4230.01 99.81 o
 2 10 1 1494.74 1500.29 63.11 o
 3 10 1 287.70 313.64 20.85 o
 4 10 1 1025.70 850.58 43.99 o
 5 10 1 437.24 452.42 77.05 o
 6 10 1 51.56 124.10 55.92 o
 7 10 1 636.39 791.61 102.97 o
 8 10 1 77.19 -34.09 67.51 o
 -8 11 1 47.20 30.69 62.05 o
 -7 11 1 32.49 72.96 55.23 o
 -6 11 1 447.22 458.85 71.60 o
 -5 11 1 78.71 34.42 18.10 o
 -4 11 1 1118.25 1003.33 64.51 o
 -3 11 1 1005.90 926.33 49.42 o
 -2 11 1 4096.71 3813.50 148.47 o
 -1 11 1 807.53 868.21 23.85 o
 0 11 1 1720.17 1858.42 48.54 o
 1 11 1 6542.92 5770.11 134.17 o
 2 11 1 1029.02 915.36 48.41 o
 3 11 1 2793.34 2496.99 74.70 o
 4 11 1 200.03 189.16 21.35 o
 5 11 1 1187.20 1230.00 103.65 o
 6 11 1 159.75 130.24 55.23 o
 7 11 1 48.72 68.87 59.32 o
 8 11 1 41.70 126.15 75.01 o
 -8 12 1 330.63 244.12 76.37 o
 -7 12 1 208.98 150.02 62.05 o
 -6 12 1 140.76 69.55 51.82 o
 -5 12 1 149.64 107.06 44.32 o
 -4 12 1 315.86 378.85 40.60 o
 -3 12 1 210.34 499.49 83.53 o
 -2 12 1 2693.54 2665.08 115.58 o
 -1 12 1 1204.81 1045.66 27.98 o
 0 12 1 2624.00 2707.56 66.88 o
 1 12 1 7743.93 7192.76 192.51 o
 2 12 1 533.58 504.69 36.61 o
 3 12 1 29.56 43.55 22.87 o
 4 12 1 26.05 10.14 13.46 o
 5 12 1 136.14 132.97 52.51 o
 6 12 1 86.48 87.28 57.28 o
 7 12 1 251.17 330.72 79.10 o
 8 12 1 74.87 47.73 72.28 o
 -8 13 1 60.18 187.52 72.28 o
 -7 13 1 214.49 218.21 64.78 o
 -6 13 1 1606.40 1551.17 120.01 o
 -5 13 1 135.42 261.16 53.87 o
 -4 13 1 1643.73 1309.95 116.26 o
 -3 13 1 1925.63 2060.90 137.06 o
 -2 13 1 1790.23 1925.49 60.10 o
 -1 13 1 289.53 376.79 21.02 o
 0 13 1 634.65 614.20 27.01 o
 1 13 1 842.47 828.00 51.17 o
 2 13 1 630.62 630.12 44.01 o
 3 13 1 2163.25 2120.65 89.17 o
 4 13 1 273.28 273.44 52.51 o
 5 13 1 407.33 486.80 72.96 o
 6 13 1 242.24 274.80 71.60 o
 7 13 1 31.90 96.83 65.46 o
 8 13 1 64.18 59.32 72.28 o
 -8 14 1 196.80 231.84 73.64 o
 -7 14 1 138.01 102.28 62.05 o
 -6 14 1 436.30 452.71 75.01 o
 -5 14 1 90.82 93.42 47.05 o
 -4 14 1 41.24 84.67 60.35 o
 -3 14 1 1661.54 1686.51 73.53 o
 -2 14 1 1593.18 1635.45 63.01 o
 -1 14 1 1249.72 1302.92 38.16 o
 0 14 1 2167.75 2189.13 66.25 o
 1 14 1 1497.04 1423.56 48.27 o
 2 14 1 423.53 450.86 44.31 o
 3 14 1 297.95 308.29 34.95 o
 4 14 1 640.00 571.36 71.60 o
 5 14 1 409.09 203.20 61.37 o
 6 14 1 72.98 23.87 54.55 o
 7 14 1 230.56 239.34 72.96 o
 8 14 1 26.09 154.11 78.42 o
 -8 15 1 12.88 81.83 66.83 o
 -7 15 1 67.23 38.87 57.28 o
 -6 15 1 226.23 298.67 67.51 o
 -5 15 1 240.11 270.03 56.60 o
 -4 15 1 1553.31 1578.70 77.61 o
 -3 15 1 975.17 887.29 51.59 o
 -2 15 1 2080.06 2089.73 65.59 o
 -1 15 1 2326.63 2241.16 58.92 o
 0 15 1 2649.16 2604.33 68.00 o
 1 15 1 654.70 659.63 31.57 o
 2 15 1 998.18 937.66 75.23 o
 3 15 1 2813.80 2461.39 101.74 o
 4 15 1 224.94 227.07 55.92 o
 5 15 1 394.10 453.39 73.64 o
 6 15 1 130.93 77.74 60.69 o
 7 15 1 6.98 -33.41 61.37 o
 8 15 1 115.77 77.05 73.64 o
 -8 16 1 5.43 -17.73 62.73 o
 -7 16 1 114.59 109.78 64.10 o
 -6 16 1 235.46 229.12 62.05 o
 -5 16 1 543.15 526.35 72.28 o
 -4 16 1 148.18 180.82 41.94 o
 -3 16 1 1925.97 1555.02 71.36 o
 -2 16 1 1567.30 1313.02 71.94 o
 -1 16 1 637.66 716.65 28.08 o
 0 16 1 47.19 102.97 30.69 o
 1 16 1 812.37 724.68 50.65 o
 2 16 1 2092.38 2152.18 70.45 o
 3 16 1 1486.78 1328.91 68.70 o
 4 16 1 944.51 1013.26 68.71 o
 5 16 1 485.13 367.47 70.92 o
 6 16 1 284.14 277.53 69.55 o
 7 16 1 41.94 63.42 67.51 o
 -8 17 1 3.81 -15.68 64.78 o
 -7 17 1 210.37 158.88 66.83 o
 -6 17 1 49.11 4.09 53.87 o
 -5 17 1 228.44 195.38 38.91 o
 -4 17 1 273.26 277.99 38.87 o
 -3 17 1 363.80 332.43 35.90 o
 -2 17 1 114.90 161.41 17.22 o
 -1 17 1 2085.51 1859.29 56.30 o
 0 17 1 2262.04 2319.79 63.14 o
 1 17 1 109.25 86.89 20.66 o
 2 17 1 593.63 587.37 35.23 o
 3 17 1 176.25 146.26 31.82 o
 4 17 1 127.03 76.12 64.44 o
 5 17 1 185.50 242.75 62.05 o
 6 17 1 756.38 923.90 109.10 o
 7 17 1 291.81 192.98 75.69 o
 -7 18 1 24.63 66.83 63.42 o
 -6 18 1 0.51 77.05 57.96 o
 -5 18 1 904.98 987.02 70.09 o
 -4 18 1 460.79 409.91 99.52 o
 -3 18 1 2312.38 1949.39 86.06 o
 -2 18 1 353.33 337.34 22.73 o
 -1 18 1 137.33 172.99 17.73 o
 0 18 1 427.71 457.70 28.92 o
 1 18 1 112.52 97.71 19.53 o
 2 18 1 1643.23 1574.09 57.82 o
 3 18 1 310.98 338.22 73.61 o
 4 18 1 927.92 866.23 64.61 o
 5 18 1 16.01 -13.64 50.46 o
 6 18 1 142.45 129.56 64.78 o
 7 18 1 15.44 -14.32 62.73 o
 -7 19 1 136.13 134.33 67.51 o
 -6 19 1 28.08 141.83 56.60 o
 -5 19 1 161.03 227.30 44.56 o
 -4 19 1 544.72 422.60 45.35 o
 -3 19 1 412.08 458.86 103.61 o
 -2 19 1 635.16 608.08 44.50 o
 -1 19 1 499.71 623.28 29.95 o
 0 19 1 1271.11 1334.86 53.54 o
 1 19 1 295.19 311.10 26.84 o
 2 19 1 1672.58 1758.96 63.54 o
 3 19 1 213.29 235.22 72.28 o
 4 19 1 7.60 24.28 32.52 o
 5 19 1 103.82 102.28 55.92 o
 6 19 1 617.59 463.62 86.60 o
 7 19 1 42.15 47.05 67.51 o
 -7 20 1 167.81 123.42 66.14 o
 -6 20 1 76.77 57.96 56.60 o
 -5 20 1 172.91 155.56 56.94 o
 -4 20 1 95.77 109.82 35.19 o
 -3 20 1 1678.23 1582.73 76.90 o
 -2 20 1 665.89 630.16 32.03 o
 -1 20 1 96.61 122.54 18.60 o
 0 20 1 1802.44 1662.31 51.21 o
 1 20 1 568.09 607.78 37.66 o
 2 20 1 33.60 57.49 21.66 o
 3 20 1 89.53 100.57 33.49 o
 4 20 1 471.69 512.84 61.71 o
 5 20 1 830.10 689.33 90.69 o
 6 20 1 113.91 96.15 62.05 o
 7 20 1 49.57 43.64 70.92 o
 -7 21 1 22.68 75.69 60.01 o
 -6 21 1 25.21 139.11 64.10 o
 -5 21 1 204.42 249.24 45.89 o
 -4 21 1 794.71 693.72 58.29 o
 -3 21 1 1599.89 1388.78 62.26 o
 -2 21 1 272.99 277.43 30.65 o
 -1 21 1 32.31 78.22 18.49 o
 0 21 1 464.28 473.96 41.03 o
 1 21 1 386.17 396.48 28.25 o
 2 21 1 105.33 136.49 24.83 o
 3 21 1 691.44 628.74 90.69 o
 4 21 1 15.67 50.55 46.71 o
 5 21 1 82.65 43.64 54.55 o
 6 21 1 86.67 96.15 62.05 o
 7 21 1 28.94 94.78 67.51 o
 -7 22 1 54.71 55.92 68.87 o
 -6 22 1 217.12 295.94 72.28 o
 -5 22 1 182.59 227.35 50.80 o
 -4 22 1 110.73 171.95 38.81 o
 -3 22 1 8.53 35.63 35.24 o
 -2 22 1 946.63 820.50 47.97 o
 -1 22 1 683.66 697.44 47.74 o
 0 22 1 939.40 996.48 40.74 o
 1 22 1 579.83 616.24 69.58 o
 2 22 1 112.87 99.13 24.99 o
 3 22 1 209.85 193.52 40.24 o
 4 22 1 310.26 333.94 107.02 o
 5 22 1 264.87 282.99 68.19 o
 6 22 1 152.35 111.15 69.55 o
 -6 23 1 17.42 107.74 65.46 o
 -5 23 1 23.23 -42.96 53.53 o
 -4 23 1 182.20 226.93 41.94 o
 -3 23 1 144.91 153.47 53.03 o
 -2 23 1 91.03 144.09 27.95 o
 -1 23 1 440.15 347.48 42.36 o
 0 23 1 1503.49 1363.04 49.58 o
 1 23 1 51.61 82.52 21.95 o
 2 23 1 90.67 110.82 34.68 o
 3 23 1 817.74 803.59 69.21 o
 4 23 1 204.08 264.31 75.01 o
 5 23 1 104.10 88.65 57.96 o
 6 23 1 8.15 -23.87 61.37 o
 -6 24 1 193.27 113.88 64.10 o
 -5 24 1 36.92 77.63 42.65 o
 -4 24 1 176.14 112.33 35.28 o
 -3 24 1 144.07 123.32 32.52 o
 -2 24 1 269.62 292.02 35.46 o
 -1 24 1 194.31 194.55 31.22 o
 0 24 1 168.05 142.17 23.60 o
 1 24 1 101.59 151.16 24.71 o
 2 24 1 54.39 147.61 39.55 o
 3 24 1 403.91 385.00 48.67 o
 4 24 1 84.74 32.73 41.22 o
 5 24 1 210.73 261.85 75.01 o
 6 24 1 75.10 84.55 69.55 o
 -6 25 1 80.75 77.74 68.87 o
 -5 25 1 72.62 -11.03 40.01 o
 -4 25 1 162.85 143.83 36.64 o
 -3 25 1 127.95 173.79 34.44 o
 -2 25 1 202.65 211.90 39.90 o
 -1 25 1 417.07 415.89 37.68 o
 0 25 1 47.05 85.90 23.13 o
 1 25 1 54.03 194.16 33.12 o
 2 25 1 225.98 249.58 36.17 o
 3 25 1 560.52 387.88 51.31 o
 4 25 1 98.12 95.65 43.85 o
 5 25 1 183.04 107.74 68.87 o
 6 25 1 112.56 131.61 72.96 o
 -6 26 1 46.91 57.96 70.23 o
 -5 26 1 46.34 96.35 39.20 o
 -4 26 1 100.16 130.98 40.01 o
 -3 26 1 252.01 266.96 39.83 o
 -2 26 1 323.71 332.83 39.84 o
 -1 26 1 477.05 436.89 56.54 o
 0 26 1 313.20 286.41 51.26 o
 1 26 1 61.74 77.26 28.99 o
 2 26 1 143.66 106.43 32.30 o
 3 26 1 157.66 127.46 43.14 o
 4 26 1 64.76 66.83 43.40 o
 5 26 1 14.09 -25.23 63.42 o
 -5 27 1 114.81 153.27 43.21 o
 -4 27 1 112.01 164.43 39.64 o
 -3 27 1 131.85 83.72 35.15 o
 -2 27 1 129.58 101.33 33.40 o
 -1 27 1 438.42 428.68 66.48 o
 0 27 1 196.70 141.77 31.63 o
 1 27 1 45.52 33.67 28.16 o
 2 27 1 89.18 61.43 32.64 o
 3 27 1 11.82 7.87 38.28 o
 4 27 1 64.60 74.01 44.83 o
 5 27 1 105.75 113.23 50.60 o
 -5 28 1 123.69 72.06 57.17 o
 -4 28 1 14.35 37.56 36.95 o
 -3 28 1 114.27 80.76 60.20 o
 -2 28 1 118.25 160.69 69.38 o
 -1 28 1 97.00 43.72 31.13 o
 0 28 1 46.80 74.25 35.67 o
 1 28 1 71.11 72.77 34.51 o
 2 28 1 146.97 187.73 38.42 o
 3 28 1 163.22 86.88 36.29 o
 4 28 1 135.24 142.31 102.97 o
 5 28 1 45.38 32.81 49.15 o
 -4 29 1 58.86 17.88 39.02 o
 -3 29 1 205.73 174.27 41.19 o
 -2 29 1 221.57 227.78 40.14 o
 -1 29 1 37.70 80.47 32.56 o
 0 29 1 78.35 115.00 42.17 o
 1 29 1 35.73 31.33 39.32 o
 2 29 1 135.26 134.54 40.77 o
 3 29 1 75.56 113.42 38.85 o
 4 29 1 0.50 -44.99 44.99 o
 -4 30 1 1.65 -19.02 36.65 o
 -3 30 1 33.35 42.04 37.70 o
 -2 30 1 308.25 358.48 70.89 o
 -1 30 1 7.36 -9.35 38.06 o
 0 30 1 5.56 16.50 39.24 o
 1 30 1 77.85 38.88 40.95 o
 2 30 1 65.20 135.26 38.83 o
 3 30 1 54.03 44.83 39.03 o
 4 30 1 63.15 16.02 43.80 o
 -3 31 1 22.29 -26.61 45.48 o
 -2 31 1 17.98 -2.38 39.46 o
 -1 31 1 10.62 9.46 44.32 o
 0 31 1 105.90 150.17 46.99 o
 1 31 1 47.53 57.62 44.83 o
 2 31 1 62.81 61.40 119.67 o
 3 31 1 18.94 82.14 41.33 o
 -3 32 1 6.62 32.00 40.65 o
 -2 32 1 139.99 60.82 49.15 o
 -1 32 1 22.41 31.87 45.03 o
 0 32 1 21.31 29.76 45.08 o
 1 32 1 38.92 32.20 61.71 o
 2 32 1 26.74 -44.42 55.92 o
 -2 33 1 8.25 -1.92 47.45 o
 -1 33 1 55.87 40.72 47.73 o
 0 33 1 0.82 -27.93 49.44 o
 1 33 1 70.14 18.19 45.29 o
 2 33 1 51.98 21.48 47.89 o
 -4 -31 2 50.95 -10.23 67.51 o
 3 -31 2 19.75 60.69 75.01 o
 -4 -30 2 44.52 -2.73 62.05 o
 -3 -30 2 43.96 15.00 57.96 o
 3 -30 2 24.29 -61.37 68.19 o
 -5 -29 2 0.71 -59.32 59.32 o
 -4 -29 2 43.42 104.33 64.78 o
 -3 -29 2 74.07 89.33 58.64 o
 2 -29 2 13.60 78.42 61.37 o
 3 -29 2 16.48 36.14 63.42 o
 4 -29 2 14.02 53.19 73.64 o
 -5 -28 2 16.36 49.78 65.46 o
 -4 -28 2 45.05 64.10 60.69 o
 -3 -28 2 103.70 32.73 54.55 o
 2 -28 2 327.82 406.34 79.10 o
 3 -28 2 22.33 106.38 68.19 o
 4 -28 2 18.46 32.73 70.23 o
 -5 -27 2 15.45 104.33 70.92 o
 -4 -27 2 10.31 -37.50 54.55 o
 -3 -27 2 118.55 124.79 57.28 o
 -2 -27 2 332.13 250.94 58.64 o
 1 -27 2 22.38 -2.05 47.73 o
 2 -27 2 105.93 187.52 64.10 o
 3 -27 2 184.60 184.11 73.64 o
 4 -27 2 83.33 126.83 80.46 o
 5 -27 2 4.45 53.87 77.74 o
 -6 -26 2 11.62 117.97 75.01 o
 -5 -26 2 36.82 52.51 64.78 o
 -4 -26 2 43.28 57.28 57.28 o
 -3 -26 2 291.88 374.29 67.51 o
 -2 -26 2 227.03 151.38 48.41 o
 1 -26 2 100.32 216.16 56.60 o
 2 -26 2 626.08 640.23 85.92 o
 3 -26 2 34.38 38.19 60.01 o
 4 -26 2 53.89 -2.73 64.10 o
 5 -26 2 38.87 143.88 83.19 o
 -6 -25 2 79.84 97.51 72.96 o
 -5 -25 2 170.86 234.57 68.87 o
 -4 -25 2 23.24 -46.37 46.37 o
 -3 -25 2 198.24 223.66 60.01 o
 -2 -25 2 124.03 140.47 49.10 o
 -1 -25 2 1871.85 1924.78 113.19 o
 1 -25 2 528.46 641.59 76.37 o
 2 -25 2 46.64 -15.68 47.73 o
 3 -25 2 141.56 183.43 65.46 o
 4 -25 2 161.63 218.89 75.69 o
 5 -25 2 30.91 -13.64 72.96 o
 -6 -24 2 4.74 118.65 71.60 o
 -5 -24 2 7.93 62.05 62.73 o
 -4 -24 2 204.84 203.89 64.10 o
 -3 -24 2 106.03 25.23 49.78 o
 -2 -24 2 472.83 649.78 73.64 o
 -1 -24 2 840.65 867.30 75.69 o
 0 -24 2 7.49 3.41 34.09 o
 1 -24 2 243.32 278.89 55.92 o
 2 -24 2 20.44 15.68 49.10 o
 3 -24 2 3.57 42.28 57.96 o
 4 -24 2 33.50 111.15 68.19 o
 5 -24 2 43.17 -55.23 58.64 o
 6 -24 2 48.51 176.61 89.33 o
 -7 -23 2 13.64 9.55 66.83 o
 -6 -23 2 180.15 47.73 60.69 o
 -5 -23 2 97.27 186.16 68.87 o
 -4 -23 2 100.21 88.65 54.55 o
 -3 -23 2 596.69 692.05 83.87 o
 -2 -23 2 424.15 600.00 70.92 o
 -1 -23 2 344.09 338.90 53.19 o
 0 -23 2 261.01 231.84 45.69 o
 1 -23 2 581.13 852.98 81.83 o
 2 -23 2 316.43 304.81 63.42 o
 3 -23 2 691.93 587.72 85.92 o
 4 -23 2 55.13 -15.68 60.01 o
 5 -23 2 18.90 -45.00 66.83 o
 6 -23 2 7.94 64.10 80.46 o
 -7 -22 2 105.68 126.15 77.05 o
 -6 -22 2 164.61 131.61 66.83 o
 -5 -22 2 12.33 78.42 63.42 o
 -4 -22 2 143.20 137.74 59.32 o
 -3 -22 2 208.44 188.20 54.55 o
 -2 -22 2 2586.34 2650.24 151.38 o
 -1 -22 2 599.75 669.99 44.51 o
 0 -22 2 100.61 146.09 25.63 o
 1 -22 2 533.98 455.44 61.37 o
 2 -22 2 59.15 42.28 44.32 o
 3 -22 2 203.48 130.24 61.37 o
 4 -22 2 73.30 78.42 60.69 o
 5 -22 2 146.87 208.66 80.46 o
 6 -22 2 40.81 287.76 87.96 o
 -7 -21 2 15.82 -43.64 66.83 o
 -6 -21 2 52.05 152.06 70.92 o
 -5 -21 2 68.90 -49.78 55.23 o
 -4 -21 2 15.40 152.06 53.87 o
 -3 -21 2 290.09 347.70 59.32 o
 -2 -21 2 743.56 761.61 75.01 o
 -1 -21 2 36.88 49.79 21.36 o
 0 -21 2 1773.37 1838.70 76.33 o
 1 -21 2 807.29 888.44 82.51 o
 2 -21 2 42.56 105.69 45.69 o
 3 -21 2 398.68 359.97 66.83 o
 4 -21 2 38.50 93.42 58.64 o
 5 -21 2 52.26 7.50 66.83 o
 6 -21 2 58.03 110.47 79.78 o
 -7 -20 2 238.62 75.01 74.33 o
 -6 -20 2 47.88 120.69 69.55 o
 -5 -20 2 126.63 152.06 64.10 o
 -4 -20 2 132.80 137.74 54.55 o
 -3 -20 2 43.04 62.73 42.28 o
 -2 -20 2 323.50 330.72 51.82 o
 -1 -20 2 222.50 277.33 40.23 o
 0 -20 2 76.13 104.36 21.44 o
 1 -20 2 206.43 246.16 47.05 o
 2 -20 2 719.66 922.53 88.65 o
 3 -20 2 205.80 243.44 62.05 o
 4 -20 2 46.78 104.33 62.73 o
 5 -20 2 338.70 383.16 86.60 o
 6 -20 2 88.48 143.88 79.10 o
 -7 -19 2 282.88 259.80 75.01 o
 -6 -19 2 129.51 205.25 64.78 o
 -5 -19 2 236.61 143.20 66.14 o
 -4 -19 2 23.64 66.14 53.19 o
 -3 -19 2 3.88 75.01 42.28 o
 -2 -19 2 482.95 608.86 63.42 o
 -1 -19 2 95.32 60.10 20.10 o
 0 -19 2 2030.55 2159.64 199.79 o
 1 -19 2 63.12 87.50 18.89 o
 2 -19 2 65.72 68.19 40.91 o
 3 -19 2 414.19 503.85 75.69 o
 4 -19 2 44.34 48.41 57.28 o
 5 -19 2 232.63 276.17 77.74 o
 6 -19 2 58.18 105.69 77.05 o
 7 -19 2 411.26 430.21 99.56 o
 -8 -18 2 25.01 124.10 70.92 o
 -7 -18 2 55.78 100.92 69.55 o
 -6 -18 2 170.47 224.34 72.96 o
 -5 -18 2 280.72 288.44 69.55 o
 -4 -18 2 452.41 484.08 70.92 o
 -3 -18 2 31.29 120.01 45.69 o
 -2 -18 2 793.07 840.71 41.25 o
 -1 -18 2 25.47 22.67 17.18 o
 0 -18 2 179.19 197.51 23.18 o
 1 -18 2 237.34 272.79 46.03 o
 2 -18 2 1386.17 1395.02 100.24 o
 3 -18 2 307.45 424.75 68.87 o
 4 -18 2 93.35 157.52 61.37 o
 5 -18 2 252.89 391.34 82.51 o
 6 -18 2 50.23 64.10 72.28 o
 7 -18 2 35.72 -7.50 69.55 o
 -8 -17 2 197.80 335.49 81.15 o
 -7 -17 2 400.32 477.94 85.24 o
 -6 -17 2 445.69 382.47 76.37 o
 -5 -17 2 18.01 51.14 53.19 o
 -4 -17 2 27.54 39.55 40.91 o
 -3 -17 2 115.44 85.92 43.64 o
 -2 -17 2 877.72 704.73 36.43 o
 -1 -17 2 30.41 62.73 23.18 o
 0 -17 2 976.15 925.94 62.05 o
 1 -17 2 850.45 752.74 65.46 o
 2 -17 2 383.69 418.61 57.96 o
 3 -17 2 24.84 89.33 47.05 o
 4 -17 2 208.26 210.02 64.10 o
 5 -17 2 56.58 99.56 62.05 o
 6 -17 2 251.21 207.30 73.64 o
 7 -17 2 351.56 369.52 96.83 o
 -8 -16 2 144.89 107.74 75.01 o
 -7 -16 2 25.73 59.32 57.28 o
 -6 -16 2 239.51 240.71 68.87 o
 -5 -16 2 578.64 593.18 80.46 o
 -4 -16 2 2117.87 2301.86 139.79 o
 -3 -16 2 53.75 96.15 40.23 o
 -2 -16 2 614.11 579.54 38.19 o
 -1 -16 2 609.97 533.17 44.32 o
 0 -16 2 371.86 472.48 46.37 o
 1 -16 2 293.58 355.88 47.05 o
 2 -16 2 1168.68 1131.81 85.92 o
 3 -16 2 451.27 739.10 79.10 o
 4 -16 2 1588.33 1560.72 115.92 o
 5 -16 2 121.67 191.61 61.37 o
 6 -16 2 38.88 51.14 67.51 o
 7 -16 2 19.34 -57.28 57.28 o
 -8 -15 2 8.19 -53.87 55.92 o
 -7 -15 2 362.13 392.70 83.19 o
 -6 -15 2 818.97 742.51 95.46 o
 -5 -15 2 215.98 274.80 59.32 o
 -4 -15 2 116.35 168.43 51.14 o
 -3 -15 2 659.57 538.63 59.32 o
 -2 -15 2 1220.95 1228.63 62.05 o
 -1 -15 2 711.55 794.34 51.82 o
 0 -15 2 2046.37 2031.15 113.19 o
 1 -15 2 2840.90 2598.42 148.65 o
 2 -15 2 151.07 151.38 40.91 o
 3 -15 2 880.09 937.53 88.65 o
 4 -15 2 548.35 587.72 74.33 o
 5 -15 2 362.19 437.02 77.05 o
 6 -15 2 736.68 729.56 100.92 o
 7 -15 2 101.56 126.83 79.10 o
 -8 -14 2 202.17 192.98 72.96 o
 -7 -14 2 60.36 4.77 61.37 o
 -6 -14 2 480.78 592.50 87.28 o
 -5 -14 2 847.80 871.39 96.15 o
 -4 -14 2 984.28 962.08 87.96 o
 -3 -14 2 377.08 424.75 25.91 o
 -2 -14 2 48.84 111.83 15.68 o
 -1 -14 2 3509.63 3840.69 171.84 o
 0 -14 2 207.10 299.35 36.82 o
 1 -14 2 4955.82 5170.93 250.25 o
 2 -14 2 942.21 1000.27 76.37 o
 3 -14 2 49.72 110.47 39.55 o
 4 -14 2 2580.61 2597.06 156.84 o
 5 -14 2 27.78 31.37 49.10 o
 6 -14 2 205.69 116.60 69.55 o
 7 -14 2 218.37 162.29 75.69 o
 -8 -13 2 78.62 99.56 68.19 o
 -7 -13 2 19.58 160.24 66.14 o
 -6 -13 2 406.67 443.84 72.96 o
 -5 -13 2 1871.55 1875.00 132.29 o
 -4 -13 2 238.55 199.11 45.69 o
 -3 -13 2 1473.52 1255.91 62.73 o
 -2 -13 2 919.75 925.26 49.10 o
 -1 -13 2 36.70 195.02 25.23 o
 0 -13 2 2256.63 2421.81 124.10 o
 1 -13 2 1938.61 2384.37 130.24 o
 2 -13 2 662.82 717.28 65.46 o
 3 -13 2 3927.94 3673.70 203.20 o
 4 -13 2 348.44 497.71 65.46 o
 5 -13 2 109.12 223.66 64.10 o
 6 -13 2 82.23 208.66 67.51 o
 7 -13 2 8.85 52.51 63.42 o
 8 -13 2 16.93 -66.83 66.83 o
 -8 -12 2 340.91 214.80 79.78 o
 -7 -12 2 206.28 214.11 72.28 o
 -6 -12 2 188.57 302.08 62.73 o
 -5 -12 2 147.45 261.85 55.23 o
 -4 -12 2 42.36 78.29 21.48 o
 -3 -12 2 5102.98 5053.71 230.48 o
 -2 -12 2 215.96 362.70 25.91 o
 -1 -12 2 2596.96 2820.03 126.83 o
 0 -12 2 2786.46 3338.89 163.65 o
 1 -12 2 455.17 1161.13 69.55 o
 2 -12 2 842.92 788.88 66.83 o
 3 -12 2 101.05 133.65 39.55 o
 4 -12 2 17.27 210.02 53.87 o
 5 -12 2 1138.00 1298.19 107.06 o
 6 -12 2 686.48 700.92 92.06 o
 7 -12 2 199.07 377.02 84.55 o
 8 -12 2 97.08 96.83 77.05 o
 -9 -11 2 14.61 7.50 66.83 o
 -8 -11 2 43.01 -23.18 62.05 o
 -7 -11 2 38.02 32.73 51.14 o
 -6 -11 2 1044.55 923.21 98.87 o
 -5 -11 2 2702.07 2691.84 161.61 o
 -4 -11 2 579.00 624.55 40.23 o
 -3 -11 2 4283.88 4095.72 193.66 o
 -2 -11 2 485.92 872.75 49.10 o
 -1 -11 2 198.57 462.94 33.41 o
 0 -11 2 2360.97 2490.68 128.20 o
 1 -11 2 460.42 756.83 54.55 o
 2 -11 2 44.67 85.92 32.73 o
 3 -11 2 753.08 509.31 63.42 o
 4 -11 2 1226.65 1180.90 96.83 o
 5 -11 2 121.90 69.55 46.37 o
 6 -11 2 14.43 87.96 57.28 o
 7 -11 2 177.96 159.56 73.64 o
 8 -11 2 61.83 124.79 77.05 o
 -9 -10 2 39.43 90.01 72.96 o
 -8 -10 2 97.49 66.83 63.42 o
 -7 -10 2 286.64 115.24 56.60 o
 -6 -10 2 837.03 894.57 96.15 o
 -5 -10 2 463.90 371.56 58.64 o
 -4 -10 2 913.13 938.90 53.19 o
 -3 -10 2 1424.50 1461.16 72.96 o
 -2 -10 2 1025.34 938.22 47.73 o
 -1 -10 2 653.20 843.43 46.37 o
 0 -10 2 206.81 407.02 35.46 o
 1 -10 2 10781.11 10993.74 522.26 o
 2 -10 2 1830.53 1793.85 109.10 o
 3 -10 2 289.18 423.39 51.82 o
 4 -10 2 1057.70 1097.71 96.15 o
 5 -10 2 337.12 405.66 64.10 o
 6 -10 2 216.99 184.79 60.01 o
 7 -10 2 99.92 81.15 60.01 o
 8 -10 2 76.38 -27.28 68.87 o
 -9 -9 2 67.37 -12.27 62.73 o
 -8 -9 2 2.34 10.91 57.96 o
 -7 -9 2 480.30 487.48 78.42 o
 -6 -9 2 604.54 733.65 86.60 o
 -5 -9 2 1122.24 1377.29 101.60 o
 -4 -9 2 1142.01 1045.20 59.32 o
 -3 -9 2 830.12 698.87 41.60 o
 -2 -9 2 1252.93 1300.91 64.10 o
 -1 -9 2 170.32 377.70 27.96 o
 0 -9 2 1289.92 1154.31 64.10 o
 1 -9 2 1378.14 1292.05 79.78 o
 2 -9 2 3547.08 3486.18 187.52 o
 3 -9 2 716.18 831.16 72.28 o
 4 -9 2 413.76 448.62 62.73 o
 5 -9 2 205.97 197.75 52.51 o
 6 -9 2 175.36 33.41 51.82 o
 7 -9 2 404.39 450.66 85.24 o
 8 -9 2 35.21 75.69 65.46 o
 -9 -8 2 58.31 45.69 61.37 o
 -8 -8 2 160.24 71.60 62.05 o
 -7 -8 2 226.13 267.98 68.19 o
 -6 -8 2 1116.48 1067.03 102.28 o
 -5 -8 2 1285.97 1303.64 97.51 o
 -4 -8 2 1739.36 1690.96 86.60 o
 -3 -8 2 1729.76 1706.57 83.87 o
 -2 -8 2 1043.49 944.35 47.05 o
 -1 -8 2 7759.69 8011.42 357.93 o
 0 -8 2 3979.58 4378.71 201.16 o
 1 -8 2 5282.57 5080.30 254.35 o
 2 -8 2 7202.93 7437.33 358.61 o
 3 -8 2 1047.85 988.68 75.69 o
 4 -8 2 2501.54 2598.42 150.70 o
 5 -8 2 537.61 492.94 72.28 o
 6 -8 2 348.79 416.57 73.64 o
 7 -8 2 57.76 110.47 65.46 o
 8 -8 2 40.72 87.28 72.96 o
 -9 -7 2 285.90 210.70 72.28 o
 -8 -7 2 215.06 119.33 61.37 o
 -7 -7 2 246.79 306.85 66.83 o
 -6 -7 2 175.95 195.02 52.51 o
 -5 -7 2 686.94 735.69 70.92 o
 -4 -7 2 348.13 337.54 33.41 o
 -3 -7 2 882.19 901.39 49.78 o
 -2 -7 2 14291.02 13950.84 630.00 o
 -1 -7 2 1770.86 1876.36 90.01 o
 0 -7 2 21644.00 22945.41 1064.30 o
 1 -7 2 3872.67 4260.06 210.70 o
 2 -7 2 1700.48 1567.53 93.42 o
 3 -7 2 2926.33 3560.50 182.07 o
 4 -7 2 253.09 217.52 47.73 o
 5 -7 2 374.85 404.29 65.46 o
 6 -7 2 1335.00 1216.36 116.60 o
 7 -7 2 222.38 225.02 66.83 o
 8 -7 2 41.46 113.19 70.23 o
 -9 -6 2 30.16 8.86 62.05 o
 -8 -6 2 14.22 23.18 48.41 o
 -7 -6 2 31.46 107.74 53.19 o
 -6 -6 2 1723.21 1890.68 128.20 o
 -5 -6 2 1023.27 891.87 46.35 o
 -4 -6 2 3459.55 3104.32 152.06 o
 -3 -6 2 1788.30 1866.82 91.37 o
 -2 -6 2 1024.13 923.90 49.10 o
 -1 -6 2 82.07 121.38 15.68 o
 0 -6 2 3020.02 3094.77 155.47 o
 1 -6 2 846.97 1067.71 60.01 o
 2 -6 2 4491.79 4191.87 214.80 o
 3 -6 2 2665.95 2644.11 146.61 o
 4 -6 2 3291.79 3181.37 175.25 o
 5 -6 2 393.31 442.48 66.14 o
 6 -6 2 22.96 50.46 51.82 o
 7 -6 2 90.28 135.70 68.19 o
 8 -6 2 66.45 44.32 68.87 o
 -9 -5 2 201.50 161.61 66.83 o
 -8 -5 2 141.12 60.69 57.28 o
 -7 -5 2 725.43 650.46 87.96 o
 -6 -5 2 478.93 507.26 70.23 o
 -5 -5 2 662.79 612.12 39.81 o
 -4 -5 2 1409.50 1513.67 83.87 o
 -3 -5 2 377.99 715.24 42.96 o
 -2 -5 2 6324.66 6486.84 302.08 o
 -1 -5 2 1024.47 1225.22 62.05 o
 0 -5 2 43155.10 47469.27 2162.76 o
 1 -5 2 11375.62 11889.00 575.45 o
 2 -5 2 205.58 230.48 32.73 o
 3 -5 2 677.94 1186.36 78.42 o
 4 -5 2 695.22 937.53 81.83 o
 5 -5 2 430.97 420.66 63.42 o
 6 -5 2 339.00 405.66 70.92 o
 7 -5 2 340.22 486.80 82.51 o
 8 -5 2 58.97 68.19 71.60 o
 -9 -4 2 16.56 146.61 68.19 o
 -8 -4 2 26.64 23.87 51.82 o
 -7 -4 2 555.64 485.44 77.05 o
 -6 -4 2 421.35 471.80 66.83 o
 -5 -4 2 351.11 387.25 41.60 o
 -4 -4 2 1670.80 1482.30 84.55 o
 -2 -4 2 353.25 293.90 25.23 o
 -1 -4 2 1401.66 1484.34 68.87 o
 0 -4 2 8804.24 9131.70 423.39 o
 1 -4 2 27273.46 28542.52 1362.29 o
 2 -4 2 10734.05 11910.14 563.86 o
 3 -4 2 870.08 924.58 63.42 o
 4 -4 2 1110.53 1196.59 86.60 o
 5 -4 2 256.73 374.97 56.60 o
 6 -4 2 318.18 278.89 62.05 o
 7 -4 2 19.83 15.68 55.92 o
 8 -4 2 14.34 6.14 66.83 o
 -9 -3 2 133.07 163.65 65.46 o
 -8 -3 2 336.11 268.67 64.10 o
 -7 -3 2 370.78 381.79 68.19 o
 -6 -3 2 355.13 379.06 58.64 o
 -5 -3 2 800.37 893.21 64.10 o
 -4 -3 2 709.16 621.82 46.37 o
 -3 -3 2 5796.95 5648.93 256.39 o
 -2 -3 2 1708.83 1966.37 95.46 o
 -1 -3 2 1094.99 1120.63 39.99 o
 0 -3 2 45827.34 51305.25 2374.15 o
 1 -3 2 326.23 365.43 32.73 o
 2 -3 2 431.18 340.88 36.82 o
 3 -3 2 1112.06 1244.32 81.83 o
 4 -3 2 848.97 673.64 66.14 o
 5 -3 2 161.65 207.98 49.78 o
 6 -3 2 85.48 145.93 53.19 o
 7 -3 2 203.78 343.61 75.01 o
 8 -3 2 316.89 426.11 89.33 o
 -9 -2 2 56.31 67.51 60.01 o
 -8 -2 2 524.67 424.75 77.74 o
 -7 -2 2 233.33 213.43 57.96 o
 -6 -2 2 201.70 256.39 53.87 o
 -5 -2 2 134.62 112.51 31.37 o
 -4 -2 2 264.47 329.35 36.14 o
 -3 -2 2 948.68 1040.43 60.01 o
 -2 -2 2 31541.15 34288.29 1527.98 o
 -1 -2 2 3479.56 3661.95 121.02 o
 0 -2 2 5656.20 6259.16 290.49 o
 1 -2 2 10249.58 10795.31 510.67 o
 2 -2 2 6630.33 7189.13 344.97 o
 3 -2 2 1502.53 1476.84 91.37 o
 4 -2 2 464.86 561.13 59.32 o
 5 -2 2 378.25 385.20 58.64 o
 6 -2 2 693.74 774.56 87.96 o
 7 -2 2 127.25 218.21 64.10 o
 8 -2 2 245.88 202.52 75.69 o
 -9 -1 2 46.29 -8.86 55.23 o
 -8 -1 2 102.70 202.52 60.69 o
 -7 -1 2 481.46 415.89 66.14 o
 -6 -1 2 468.56 536.58 66.14 o
 -5 -1 2 892.60 859.12 65.46 o
 -4 -1 2 582.69 552.26 47.73 o
 -3 -1 2 256.90 257.07 28.64 o
 -2 -1 2 1918.73 1789.08 89.33 o
 -1 -1 2 372.01 395.37 17.59 o
 0 -1 2 1454.45 1526.62 77.74 o
 1 -1 2 25480.94 26561.15 1217.72 o
 2 -1 2 1144.06 1126.35 64.78 o
 3 -1 2 12619.23 13586.03 621.82 o
 4 -1 2 1793.06 1924.78 114.56 o
 5 -1 2 206.26 423.39 58.64 o
 6 -1 2 194.52 254.35 56.60 o
 7 -1 2 62.09 126.15 57.96 o
 8 -1 2 32.28 21.82 60.01 o
 -9 0 2 157.28 107.74 60.01 o
 -8 0 2 857.23 1098.39 106.38 o
 -7 0 2 258.44 184.79 52.51 o
 -6 0 2 215.62 247.53 47.73 o
 -5 0 2 35.60 4.77 27.28 o
 -4 0 2 25.55 62.05 22.50 o
 -3 0 2 1295.93 1037.70 60.69 o
 -1 0 2 43240.94 45369.32 1163.06 o
 0 0 2 2.09 -1.92 8.52 o
 1 0 2 442.64 376.34 27.96 o
 2 0 2 252.81 254.35 29.32 o
 3 0 2 426.93 398.84 43.64 o
 4 0 2 159.41 384.52 46.37 o
 5 0 2 311.09 470.44 61.37 o
 6 0 2 532.76 536.58 69.55 o
 7 0 2 277.89 300.71 69.55 o
 8 0 2 256.46 211.35 54.11 o
 -9 1 2 46.29 64.78 56.60 o
 -8 1 2 102.70 267.30 61.37 o
 -7 1 2 481.46 316.40 58.64 o
 -6 1 2 468.56 415.89 57.96 o
 -5 1 2 892.60 1036.34 70.23 o
 -4 1 2 582.69 532.49 49.10 o
 -3 1 2 256.90 216.84 30.00 o
 -2 1 2 1918.73 1740.67 90.01 o
 -1 1 2 372.01 344.63 37.27 o
 0 1 2 1454.45 1562.30 44.46 o
 1 1 2 25480.93 27766.37 1286.60 o
 2 1 2 1144.06 1034.29 62.73 o
 3 1 2 12619.24 13644.67 620.45 o
 4 1 2 1793.06 1991.60 113.88 o
 6 1 2 194.52 201.84 52.51 o
 7 1 2 62.09 59.32 53.19 o
 8 1 2 32.28 40.55 46.02 o
 -9 2 2 56.31 1.36 68.19 o
 -8 2 2 524.67 552.95 77.05 o
 -7 2 2 233.33 293.90 56.60 o
 -6 2 2 201.70 319.81 51.14 o
 -5 2 2 134.62 177.29 37.50 o
 -4 2 2 264.47 253.66 37.50 o
 -3 2 2 948.68 1041.80 64.78 o
 -2 2 2 31541.15 34407.41 1080.44 o
 -1 2 2 3479.56 3742.47 85.53 o
 0 2 2 5656.20 6433.39 167.69 o
 1 2 2 10249.58 11598.23 485.78 o
 2 2 2 6630.33 7623.23 337.84 o
 3 2 2 1502.53 1620.04 88.65 o
 4 2 2 464.86 578.18 55.92 o
 5 2 2 378.25 366.79 53.87 o
 6 2 2 693.74 790.25 83.87 o
 7 2 2 127.25 65.96 40.42 o
 8 2 2 245.88 342.31 112.82 o
 -9 3 2 133.07 77.74 71.60 o
 -8 3 2 336.11 302.77 49.03 o
 -7 3 2 370.78 384.52 61.37 o
 -6 3 2 355.13 407.70 55.23 o
 -5 3 2 800.37 865.94 69.55 o
 -4 3 2 709.16 569.31 49.10 o
 -3 3 2 5796.96 5367.99 259.80 o
 -2 3 2 1708.84 1955.28 56.67 o
 -1 3 2 1094.99 1148.89 28.85 o
 0 3 2 45827.34 54076.48 1187.02 o
 1 3 2 326.23 268.22 46.37 o
 2 3 2 431.18 430.36 27.28 o
 3 3 2 1112.06 1311.38 56.95 o
 4 3 2 848.97 720.44 45.68 o
 5 3 2 161.66 219.36 99.90 o
 6 3 2 85.48 127.44 36.49 o
 7 3 2 203.78 274.31 53.19 o
 8 3 2 316.89 310.94 87.96 o
 -9 4 2 16.56 64.78 68.19 o
 -8 4 2 26.64 72.24 38.01 o
 -7 4 2 555.64 624.72 53.54 o
 -6 4 2 421.35 519.53 60.01 o
 -5 4 2 351.12 205.93 38.87 o
 -4 4 2 1670.80 1589.36 92.74 o
 -3 4 2 569.75 882.98 60.01 o
 -2 4 2 353.25 365.82 18.49 o
 -1 4 2 1401.67 1339.23 30.46 o
 0 4 2 8804.26 9437.68 211.34 o
 1 4 2 27273.48 31543.52 961.11 o
 2 4 2 10734.06 12638.75 653.22 o
 3 4 2 870.08 813.10 47.39 o
 4 4 2 1110.53 1201.56 58.23 o
 5 4 2 256.73 292.99 41.60 o
 6 4 2 318.18 316.91 42.88 o
 7 4 2 19.83 9.06 36.85 o
 8 4 2 14.34 -47.05 66.83 o
 -9 5 2 201.50 105.69 79.10 o
 -8 5 2 141.12 144.56 62.73 o
 -7 5 2 725.43 806.82 58.82 o
 -6 5 2 478.93 464.45 43.09 o
 -5 5 2 662.79 667.66 46.00 o
 -4 5 2 1409.49 1554.67 65.32 o
 -3 5 2 377.99 640.40 29.51 o
 -2 5 2 6324.66 6742.69 177.28 o
 -1 5 2 1024.47 1223.07 27.79 o
 0 5 2 43155.10 49038.05 1081.34 o
 1 5 2 11375.66 13141.23 405.20 o
 2 5 2 205.58 210.07 18.92 o
 3 5 2 677.94 1123.41 51.58 o
 4 5 2 695.22 820.04 49.48 o
 5 5 2 430.97 569.37 46.17 o
 6 5 2 339.00 388.27 78.04 o
 7 5 2 340.22 318.01 49.90 o
 8 5 2 58.97 47.05 71.60 o
 -9 6 2 30.16 140.47 75.69 o
 -8 6 2 14.22 -47.05 57.28 o
 -7 6 2 31.46 78.64 31.93 o
 -6 6 2 1723.21 1856.51 82.80 o
 -5 6 2 1023.27 848.22 112.17 o
 -4 6 2 3459.55 3142.27 217.15 o
 -3 6 2 1788.31 1826.15 82.01 o
 -2 6 2 1024.12 918.03 32.26 o
 -1 6 2 82.07 92.32 7.87 o
 0 6 2 3020.03 3346.30 77.80 o
 1 6 2 846.97 968.70 28.67 o
 2 6 2 4491.80 4565.41 149.77 o
 3 6 2 2665.95 2795.58 100.63 o
 4 6 2 3291.78 3334.57 121.54 o
 5 6 2 393.31 496.90 88.99 o
 6 6 2 22.96 33.93 32.09 o
 7 6 2 90.28 143.20 68.19 o
 8 6 2 66.45 -2.73 67.51 o
 -9 7 2 285.90 212.07 80.46 o
 -8 7 2 215.06 320.49 75.01 o
 -7 7 2 246.79 277.61 39.92 o
 -6 7 2 175.95 233.00 32.09 o
 -5 7 2 686.93 652.42 49.64 o
 -4 7 2 348.13 400.76 33.00 o
 -3 7 2 882.18 840.31 34.50 o
 -2 7 2 14291.00 14162.22 367.40 o
 -1 7 2 1770.85 1836.27 46.44 o
 0 7 2 21643.96 24097.61 532.38 o
 1 7 2 3872.68 4463.05 104.36 o
 2 7 2 1700.49 1686.15 62.80 o
 3 7 2 2926.33 3559.26 194.31 o
 4 7 2 253.09 309.20 30.45 o
 5 7 2 374.85 468.94 41.42 o
 6 7 2 1334.99 1453.84 76.93 o
 7 7 2 222.38 280.26 75.69 o
 8 7 2 41.46 -35.46 66.14 o
 -9 8 2 58.31 8.18 63.42 o
 -8 8 2 160.24 303.44 75.01 o
 -7 8 2 226.12 284.35 64.78 o
 -6 8 2 1116.48 1023.25 58.78 o
 -5 8 2 1285.97 1240.40 59.27 o
 -4 8 2 1739.37 1655.47 117.93 o
 -3 8 2 1729.74 1666.31 55.50 o
 -2 8 2 1043.50 834.98 36.23 o
 -1 8 2 7759.69 7879.66 180.47 o
 0 8 2 3979.58 4253.00 113.80 o
 1 8 2 5282.59 5472.22 126.18 o
 2 8 2 7202.94 7724.06 289.77 o
 3 8 2 1047.85 1012.55 76.00 o
 4 8 2 2501.54 2654.67 101.07 o
 5 8 2 537.61 652.42 47.89 o
 6 8 2 348.79 296.62 68.19 o
 7 8 2 57.76 68.87 61.37 o
 8 8 2 40.72 -3.41 71.60 o
 -9 9 2 67.37 7.50 72.28 o
 -8 9 2 2.34 -53.19 53.19 o
 -7 9 2 480.30 408.39 74.33 o
 -6 9 2 604.54 638.37 47.51 o
 -5 9 2 1122.24 1267.98 60.28 o
 -4 9 2 1142.00 1010.98 43.26 o
 -3 9 2 830.12 725.00 32.90 o
 -2 9 2 1252.93 1266.66 37.50 o
 -1 9 2 170.33 348.82 26.16 o
 0 9 2 1289.92 1121.63 31.81 o
 1 9 2 1378.14 1403.72 38.35 o
 2 9 2 3547.08 3796.15 105.13 o
 3 9 2 716.17 788.44 39.07 o
 4 9 2 413.76 479.13 35.32 o
 5 9 2 205.97 247.57 32.16 o
 6 9 2 175.35 216.16 62.05 o
 7 9 2 404.39 387.93 80.46 o
 8 9 2 35.21 4.09 68.87 o
 -9 10 2 39.43 98.19 75.01 o
 -8 10 2 97.49 175.25 68.87 o
 -7 10 2 286.64 323.22 66.14 o
 -6 10 2 837.02 812.75 84.55 o
 -5 10 2 463.90 412.35 71.91 o
 -4 10 2 913.13 923.68 50.40 o
 -3 10 2 1424.49 1470.43 51.04 o
 -2 10 2 1025.33 904.55 30.26 o
 -1 10 2 653.18 731.64 24.89 o
 0 10 2 206.81 330.53 28.62 o
 1 10 2 10781.11 11529.65 290.81 o
 2 10 2 1830.53 1938.26 59.44 o
 3 10 2 289.18 360.85 32.05 o
 4 10 2 1057.70 1045.41 52.34 o
 5 10 2 337.12 285.03 58.64 o
 6 10 2 216.99 231.16 65.46 o
 7 10 2 99.92 124.79 67.51 o
 8 10 2 76.38 83.19 76.37 o
 -9 11 2 14.61 24.55 66.83 o
 -8 11 2 43.01 25.23 60.01 o
 -7 11 2 38.02 97.51 55.23 o
 -6 11 2 1044.54 1033.61 95.46 o
 -5 11 2 2702.08 2715.05 102.04 o
 -4 11 2 578.99 651.46 37.21 o
 -3 11 2 4283.88 4296.16 121.52 o
 -2 11 2 485.93 1033.74 43.85 o
 -1 11 2 198.57 385.90 22.38 o
 0 11 2 2360.99 2573.65 64.13 o
 1 11 2 460.43 680.25 24.41 o
 2 11 2 44.67 82.28 25.98 o
 3 11 2 753.08 732.92 35.97 o
 4 11 2 1226.66 1225.83 86.94 o
 5 11 2 121.90 119.33 49.10 o
 6 11 2 14.43 -18.41 51.14 o
 7 11 2 177.96 124.79 69.55 o
 8 11 2 61.83 -15.00 72.28 o
 -8 12 2 340.91 344.97 76.37 o
 -7 12 2 206.28 211.39 64.10 o
 -6 12 2 188.57 196.39 55.92 o
 -5 12 2 147.46 249.57 50.46 o
 -4 12 2 42.36 60.20 19.28 o
 -3 12 2 5102.98 5087.73 143.43 o
 -2 12 2 215.96 366.40 28.21 o
 -1 12 2 2596.95 2510.55 57.56 o
 0 12 2 2786.47 3339.87 82.05 o
 1 12 2 455.17 1074.34 59.83 o
 2 12 2 842.93 830.61 36.45 o
 3 12 2 101.05 161.59 16.22 o
 4 12 2 17.27 98.87 44.32 o
 5 12 2 1138.00 1014.59 101.60 o
 6 12 2 686.49 709.10 96.15 o
 7 12 2 199.07 204.57 78.42 o
 8 12 2 97.08 68.19 77.74 o
 -8 13 2 78.63 112.51 66.83 o
 -7 13 2 19.58 87.28 56.60 o
 -6 13 2 406.67 334.13 62.05 o
 -5 13 2 1871.56 1960.92 124.79 o
 -4 13 2 238.55 192.73 30.13 o
 -3 13 2 1473.53 1310.33 66.67 o
 -2 13 2 919.77 902.67 32.55 o
 -1 13 2 36.70 183.99 11.92 o
 0 13 2 2256.63 2411.98 62.25 o
 1 13 2 1938.60 2461.88 63.45 o
 2 13 2 662.83 702.83 28.80 o
 3 13 2 3927.92 3883.51 111.29 o
 4 13 2 348.44 322.54 62.73 o
 5 13 2 109.12 123.42 55.92 o
 6 13 2 82.23 98.19 59.32 o
 7 13 2 8.85 19.09 66.14 o
 8 13 2 16.93 18.41 75.01 o
 -8 14 2 202.17 137.06 68.19 o
 -7 14 2 60.37 1.36 49.78 o
 -6 14 2 480.78 430.89 70.23 o
 -5 14 2 847.80 961.58 64.82 o
 -4 14 2 984.27 883.24 57.28 o
 -3 14 2 377.08 466.66 33.04 o
 -2 14 2 48.84 92.74 9.96 o
 -1 14 2 3509.65 3513.24 78.54 o
 0 14 2 207.10 340.41 18.98 o
 1 14 2 4955.82 5117.51 122.90 o
 2 14 2 942.22 950.38 41.16 o
 3 14 2 49.72 44.13 27.16 o
 4 14 2 2580.61 2452.49 155.47 o
 5 14 2 27.78 27.96 53.19 o
 6 14 2 205.69 218.89 70.23 o
 7 14 2 218.37 225.02 79.10 o
 -8 15 2 8.19 86.60 65.46 o
 -7 15 2 362.13 385.20 73.64 o
 -6 15 2 818.97 963.45 94.78 o
 -5 15 2 215.98 276.38 41.74 o
 -4 15 2 116.35 60.92 43.64 o
 -3 15 2 659.58 566.48 85.64 o
 -2 15 2 1220.96 1176.94 33.28 o
 -1 15 2 711.56 759.45 24.74 o
 0 15 2 2046.37 2163.35 59.55 o
 1 15 2 2840.90 2890.85 73.00 o
 2 15 2 151.06 194.80 32.42 o
 3 15 2 880.09 867.54 58.77 o
 4 15 2 548.36 651.14 77.74 o
 5 15 2 362.19 302.08 66.83 o
 6 15 2 736.68 950.49 108.42 o
 7 15 2 101.56 150.02 76.37 o
 -8 16 2 144.89 26.59 64.10 o
 -7 16 2 25.73 21.82 57.28 o
 -6 16 2 239.51 212.75 58.64 o
 -5 16 2 578.64 610.63 54.72 o
 -4 16 2 2117.87 2045.72 91.85 o
 -3 16 2 53.75 102.54 21.23 o
 -2 16 2 614.11 653.01 30.50 o
 -1 16 2 609.97 591.74 25.22 o
 0 16 2 371.86 427.97 22.68 o
 1 16 2 293.58 307.74 25.68 o
 2 16 2 1168.68 1262.45 50.05 o
 3 16 2 451.28 591.47 51.11 o
 4 16 2 1588.34 1648.00 122.06 o
 5 16 2 121.67 186.16 62.73 o
 6 16 2 38.88 79.78 60.69 o
 7 16 2 19.34 186.16 82.51 o
 -8 17 2 197.80 201.16 75.69 o
 -7 17 2 400.32 407.70 77.74 o
 -6 17 2 445.69 439.07 73.64 o
 -5 17 2 18.01 26.21 31.36 o
 -4 17 2 27.54 37.47 27.24 o
 -3 17 2 115.44 98.04 25.36 o
 -2 17 2 877.73 760.78 46.04 o
 -1 17 2 30.41 29.99 11.13 o
 0 17 2 976.15 777.43 30.68 o
 1 17 2 850.44 844.12 40.34 o
 2 17 2 383.69 434.63 32.34 o
 3 17 2 24.84 42.39 28.20 o
 4 17 2 208.26 276.17 63.42 o
 5 17 2 56.58 36.14 52.51 o
 6 17 2 251.21 225.71 73.64 o
 7 17 2 351.57 334.13 88.65 o
 -8 18 2 25.01 48.41 66.83 o
 -7 18 2 55.78 26.59 57.28 o
 -6 18 2 170.47 62.73 55.23 o
 -5 18 2 280.72 276.14 43.10 o
 -4 18 2 452.40 465.60 105.35 o
 -3 18 2 31.29 96.34 23.75 o
 -2 18 2 793.06 902.34 33.53 o
 -1 18 2 25.46 63.45 16.04 o
 0 18 2 179.19 213.60 23.11 o
 1 18 2 237.34 301.46 27.41 o
 2 18 2 1386.16 1416.65 56.14 o
 3 18 2 307.45 386.94 44.60 o
 4 18 2 93.35 96.83 50.46 o
 5 18 2 252.89 279.58 72.96 o
 6 18 2 50.23 7.50 60.69 o
 7 18 2 35.72 113.88 73.64 o
 -7 19 2 282.88 274.12 70.92 o
 -6 19 2 129.51 223.66 62.73 o
 -5 19 2 236.61 245.69 44.77 o
 -4 19 2 23.64 31.81 29.17 o
 -3 19 2 3.88 -7.94 21.32 o
 -2 19 2 482.95 465.51 78.94 o
 -1 19 2 95.32 105.91 16.49 o
 0 19 2 2030.54 2181.58 94.60 o
 1 19 2 63.12 99.44 21.91 o
 2 19 2 65.72 129.38 24.97 o
 3 19 2 414.19 488.09 49.64 o
 4 19 2 44.34 -7.50 44.32 o
 5 19 2 232.63 185.47 66.14 o
 6 19 2 58.18 -10.23 64.78 o
 7 19 2 411.26 364.06 88.65 o
 -7 20 2 238.62 215.48 70.92 o
 -6 20 2 47.88 43.64 55.23 o
 -5 20 2 126.63 95.46 38.31 o
 -4 20 2 132.80 154.73 31.67 o
 -3 20 2 43.04 100.29 25.73 o
 -2 20 2 323.50 309.22 50.04 o
 -1 20 2 222.50 266.19 23.06 o
 0 20 2 76.13 100.54 18.50 o
 1 20 2 206.44 299.15 29.73 o
 2 20 2 719.66 826.83 49.77 o
 3 20 2 205.79 242.31 40.72 o
 4 20 2 46.78 22.44 53.19 o
 5 20 2 338.69 369.52 76.37 o
 6 20 2 88.48 186.16 75.69 o
 -7 21 2 15.82 -29.32 57.96 o
 -6 21 2 52.05 27.96 57.28 o
 -5 21 2 68.90 79.20 40.91 o
 -4 21 2 15.40 66.82 29.23 o
 -3 21 2 290.08 317.99 34.35 o
 -2 21 2 743.56 759.45 45.20 o
 -1 21 2 36.88 97.09 18.02 o
 0 21 2 1773.38 1882.12 57.86 o
 1 21 2 807.29 871.05 47.75 o
 2 21 2 42.55 87.18 24.68 o
 3 21 2 398.68 528.19 53.90 o
 4 21 2 38.51 29.43 35.90 o
 5 21 2 52.26 -55.23 55.23 o
 6 21 2 58.03 23.87 62.73 o
 -7 22 2 105.68 182.07 74.33 o
 -6 22 2 164.61 204.57 64.78 o
 -5 22 2 12.33 32.87 40.47 o
 -4 22 2 143.21 114.63 31.69 o
 -3 22 2 208.44 217.08 45.22 o
 -2 22 2 2586.35 2543.19 87.83 o
 -1 22 2 599.75 632.97 42.10 o
 0 22 2 100.61 108.61 30.90 o
 1 22 2 533.98 483.84 47.79 o
 2 22 2 59.15 68.38 35.64 o
 3 22 2 203.48 182.79 43.27 o
 4 22 2 73.30 159.57 52.16 o
 5 22 2 146.87 250.94 75.01 o
 6 22 2 40.81 85.24 66.14 o
 -7 23 2 13.64 70.23 66.14 o
 -6 23 2 180.15 159.14 46.60 o
 -5 23 2 97.26 77.85 37.90 o
 -4 23 2 100.21 146.05 34.69 o
 -3 23 2 596.69 553.69 44.16 o
 -2 23 2 424.16 515.57 53.55 o
 -1 23 2 344.09 426.87 36.32 o
 0 23 2 261.01 249.50 25.71 o
 1 23 2 581.13 761.44 76.79 o
 2 23 2 316.43 361.01 35.81 o
 3 23 2 691.92 628.56 62.39 o
 4 23 2 55.13 137.49 44.16 o
 5 23 2 18.90 30.00 61.37 o
 6 23 2 7.94 -62.05 62.05 o
 -6 24 2 4.74 25.11 38.47 o
 -5 24 2 7.93 45.39 34.88 o
 -4 24 2 204.84 175.60 36.01 o
 -3 24 2 106.03 63.37 30.12 o
 -2 24 2 472.83 525.13 42.40 o
 -1 24 2 840.65 767.40 77.23 o
 0 24 2 7.49 2.79 19.70 o
 1 24 2 243.32 261.47 32.18 o
 2 24 2 20.44 94.85 35.90 o
 3 24 2 3.57 92.38 38.70 o
 4 24 2 33.50 8.89 41.22 o
 5 24 2 43.17 122.06 64.78 o
 6 24 2 48.51 -35.46 66.14 o
 -6 25 2 79.84 41.78 40.28 o
 -5 25 2 170.86 212.42 42.71 o
 -4 25 2 23.24 -8.59 31.44 o
 -3 25 2 198.24 256.98 38.87 o
 -2 25 2 124.03 141.76 54.50 o
 -1 25 2 1871.85 1670.22 70.77 o
 0 25 2 42.96 28.45 38.69 o
 1 25 2 528.46 565.55 48.13 o
 2 25 2 46.64 112.51 37.13 o
 3 25 2 141.56 101.43 42.42 o
 4 25 2 161.63 183.26 104.33 o
 5 25 2 30.91 28.64 67.51 o
 -6 26 2 11.62 35.92 41.21 o
 -5 26 2 36.82 17.12 53.06 o
 -4 26 2 43.28 59.39 36.63 o
 -3 26 2 291.88 336.07 66.66 o
 -2 26 2 227.03 188.17 34.56 o
 -1 26 2 69.52 149.96 31.61 o
 0 26 2 25.18 -14.68 25.79 o
 1 26 2 100.32 180.64 29.61 o
 2 26 2 626.08 603.52 83.87 o
 3 26 2 34.38 25.06 40.49 o
 4 26 2 53.89 140.93 46.99 o
 5 26 2 38.87 30.69 70.92 o
 -5 27 2 15.45 41.56 38.27 o
 -4 27 2 10.31 53.06 35.65 o
 -3 27 2 118.55 117.70 35.71 o
 -2 27 2 332.13 362.87 42.41 o
 -1 27 2 30.21 17.85 28.71 o
 0 27 2 47.74 62.09 29.64 o
 1 27 2 22.38 1.14 29.53 o
 2 27 2 105.93 151.47 43.40 o
 3 27 2 184.59 220.07 50.34 o
 4 27 2 83.33 107.16 63.76 o
 5 27 2 4.45 -23.87 70.23 o
 -5 28 2 16.36 115.29 43.18 o
 -4 28 2 45.05 43.79 38.11 o
 -3 28 2 103.70 144.80 38.14 o
 -2 28 2 638.51 571.73 73.70 o
 -1 28 2 20.03 7.95 30.12 o
 0 28 2 8.62 17.34 28.80 o
 1 28 2 97.09 82.41 37.60 o
 2 28 2 327.82 337.76 44.14 o
 3 28 2 22.33 120.47 47.22 o
 4 28 2 18.46 0.17 45.08 o
 -5 29 2 0.71 -36.03 36.03 o
 -4 29 2 43.42 88.24 41.24 o
 -3 29 2 74.07 77.24 36.36 o
 -2 29 2 80.39 122.13 37.16 o
 -1 29 2 160.65 150.65 35.61 o
 0 29 2 35.22 -5.51 36.21 o
 1 29 2 104.71 84.96 60.01 o
 2 29 2 13.60 59.32 46.93 o
 3 29 2 16.48 -9.42 42.67 o
 4 29 2 14.02 -7.58 48.69 o
 -4 30 2 44.52 12.88 39.46 o
 -3 30 2 43.96 66.58 38.11 o
 -2 30 2 169.79 289.15 43.24 o
 -1 30 2 7.72 37.14 34.02 o
 0 30 2 186.03 266.39 47.73 o
 1 30 2 6.98 33.77 40.77 o
 2 30 2 127.29 142.14 49.15 o
 3 30 2 24.29 -42.26 42.26 o
 -4 31 2 50.95 27.84 40.98 o
 -3 31 2 215.32 137.39 43.38 o
 -2 31 2 25.35 48.20 37.82 o
 -1 31 2 191.71 116.63 45.78 o
 0 31 2 55.53 68.41 42.09 o
 1 31 2 39.66 98.70 91.37 o
 2 31 2 12.09 92.74 46.29 o
 3 31 2 19.75 -12.69 38.42 o
 -3 32 2 14.57 24.20 41.57 o
 -2 32 2 52.11 37.17 38.97 o
 -1 32 2 2.06 51.25 46.60 o
 0 32 2 13.77 -40.74 40.74 o
 1 32 2 7.34 28.49 45.32 o
 2 32 2 56.19 53.12 49.17 o
 -2 33 2 18.19 75.96 79.78 o
 -1 33 2 0.85 -27.28 45.32 o
 0 33 2 51.40 90.02 49.64 o
 1 33 2 18.51 61.06 74.67 o
 -4 -30 3 7.19 33.41 64.10 o
 2 -30 3 106.50 112.51 66.83 o
 3 -30 3 49.17 178.66 75.69 o
 -5 -29 3 13.35 77.05 69.55 o
 -4 -29 3 14.13 60.69 62.05 o
 -3 -29 3 35.57 28.64 52.51 o
 2 -29 3 9.45 -15.68 57.96 o
 3 -29 3 23.24 47.05 69.55 o
 -5 -28 3 60.53 -60.01 60.01 o
 -4 -28 3 19.49 -55.92 55.92 o
 -3 -28 3 77.99 45.69 53.19 o
 1 -28 3 241.47 238.66 64.78 o
 2 -28 3 20.04 90.69 63.42 o
 3 -28 3 73.22 88.65 72.28 o
 4 -28 3 95.33 49.10 75.69 o
 -5 -27 3 88.04 85.24 66.83 o
 -4 -27 3 19.97 -22.50 55.23 o
 -3 -27 3 246.03 372.93 73.64 o
 -2 -27 3 117.26 101.60 51.82 o
 1 -27 3 62.91 8.86 47.73 o
 2 -27 3 25.57 57.28 57.96 o
 3 -27 3 31.90 42.96 65.46 o
 4 -27 3 138.66 80.46 81.15 o
 -6 -26 3 50.03 192.98 81.83 o
 -5 -26 3 131.36 214.80 74.33 o
 -4 -26 3 112.64 98.87 62.05 o
 -3 -26 3 448.87 424.75 73.64 o
 -2 -26 3 57.84 96.15 48.41 o
 1 -26 3 117.03 126.83 53.87 o
 2 -26 3 34.42 66.83 57.28 o
 3 -26 3 62.18 64.78 66.14 o
 4 -26 3 15.57 -22.50 66.83 o
 5 -26 3 17.45 -34.09 77.05 o
 -6 -25 3 15.08 -8.86 69.55 o
 -5 -25 3 114.04 17.73 63.42 o
 -4 -25 3 64.77 68.19 57.28 o
 -3 -25 3 312.36 211.39 59.32 o
 -2 -25 3 1276.91 1226.59 99.56 o
 0 -25 3 71.03 64.78 42.28 o
 1 -25 3 48.49 13.64 43.64 o
 2 -25 3 51.51 157.52 60.69 o
 3 -25 3 34.66 17.73 60.69 o
 4 -25 3 197.33 177.97 78.42 o
 5 -25 3 170.70 92.06 81.15 o
 -6 -24 3 22.77 25.91 68.87 o
 -5 -24 3 63.19 158.88 71.60 o
 -4 -24 3 411.88 259.12 72.28 o
 -3 -24 3 228.46 304.12 60.01 o
 -2 -24 3 1243.06 1173.40 96.15 o
 -1 -24 3 67.27 81.83 40.23 o
 0 -24 3 597.71 713.87 70.23 o
 1 -24 3 38.88 71.60 45.00 o
 2 -24 3 450.43 360.65 68.87 o
 3 -24 3 46.44 83.19 62.73 o
 4 -24 3 103.78 135.70 72.96 o
 5 -24 3 71.26 120.69 70.23 o
 -7 -23 3 10.91 15.68 71.60 o
 -6 -23 3 26.95 -36.14 65.46 o
 -5 -23 3 410.22 325.94 75.01 o
 -4 -23 3 118.62 105.69 58.64 o
 -3 -23 3 750.15 743.19 83.19 o
 -2 -23 3 85.94 79.78 43.64 o
 -1 -23 3 1846.04 1701.19 107.74 o
 0 -23 3 258.10 235.25 45.69 o
 1 -23 3 134.96 139.11 48.41 o
 2 -23 3 437.27 474.53 73.64 o
 3 -23 3 201.13 151.38 63.42 o
 4 -23 3 103.07 167.75 66.83 o
 5 -23 3 7.48 37.50 69.55 o
 -7 -22 3 93.10 152.74 72.28 o
 -6 -22 3 43.05 37.50 69.55 o
 -5 -22 3 24.20 38.19 55.92 o
 -4 -22 3 88.93 130.24 56.60 o
 -3 -22 3 9.06 50.46 44.32 o
 -2 -22 3 56.85 25.91 38.19 o
 -1 -22 3 944.58 878.41 50.37 o
 0 -22 3 441.34 529.76 59.32 o
 1 -22 3 50.40 137.74 46.37 o
 2 -22 3 152.03 234.57 63.42 o
 3 -22 3 128.35 72.28 51.82 o
 4 -22 3 150.53 112.51 59.32 o
 5 -22 3 193.55 209.34 78.42 o
 6 -22 3 245.55 232.53 83.19 o
 -7 -21 3 9.00 -21.14 70.23 o
 -6 -21 3 21.33 46.37 66.83 o
 -5 -21 3 367.63 479.98 85.92 o
 -4 -21 3 715.08 654.55 82.51 o
 -3 -21 3 205.42 234.57 57.28 o
 -2 -21 3 332.44 347.02 54.55 o
 -1 -21 3 219.71 298.67 44.32 o
 0 -21 3 199.42 252.98 45.00 o
 1 -21 3 1010.08 936.17 86.60 o
 2 -21 3 474.38 601.36 77.74 o
 3 -21 3 70.32 94.78 51.82 o
 4 -21 3 203.19 143.20 61.37 o
 5 -21 3 176.02 145.24 70.23 o
 6 -21 3 61.88 41.60 73.64 o
 -7 -20 3 7.26 19.09 72.28 o
 -6 -20 3 242.64 213.43 75.01 o
 -5 -20 3 83.10 120.69 60.01 o
 -4 -20 3 2643.72 2647.52 162.29 o
 -3 -20 3 1317.13 1019.36 97.51 o
 -1 -20 3 1348.84 1176.13 79.78 o
 0 -20 3 255.49 236.62 43.64 o
 1 -20 3 271.21 301.40 54.55 o
 2 -20 3 58.52 102.97 47.73 o
 3 -20 3 659.08 478.62 73.64 o
 4 -20 3 336.52 279.58 67.51 o
 5 -20 3 206.11 109.78 64.10 o
 6 -20 3 29.95 47.05 74.33 o
 -8 -19 3 42.77 17.05 64.10 o
 -7 -19 3 25.33 33.41 64.10 o
 -6 -19 3 169.57 272.08 77.05 o
 -5 -19 3 92.89 106.38 55.92 o
 -4 -19 3 34.29 38.87 43.64 o
 -1 -19 3 634.64 651.14 59.32 o
 0 -19 3 278.68 216.84 40.23 o
 1 -19 3 603.16 638.87 68.19 o
 2 -19 3 134.73 226.39 52.51 o
 3 -19 3 11.29 12.27 40.91 o
 4 -19 3 49.86 21.82 51.82 o
 5 -19 3 513.49 374.29 83.87 o
 6 -19 3 123.60 43.64 69.55 o
 -8 -18 3 9.33 22.50 75.69 o
 -7 -18 3 2.15 -28.64 64.78 o
 -6 -18 3 178.34 232.53 74.33 o
 -5 -18 3 47.00 119.33 53.19 o
 -4 -18 3 464.20 316.40 62.73 o
 -2 -18 3 386.93 428.84 41.60 o
 -1 -18 3 61.20 68.19 28.64 o
 0 -18 3 304.55 342.24 45.69 o
 1 -18 3 319.03 357.24 51.14 o
 2 -18 3 301.46 291.17 55.23 o
 3 -18 3 1568.41 1397.74 111.83 o
 4 -18 3 245.12 113.88 57.96 o
 5 -18 3 384.74 281.62 75.01 o
 6 -18 3 29.84 97.51 68.87 o
 -8 -17 3 68.68 -4.09 70.23 o
 -7 -17 3 15.26 129.56 62.73 o
 -6 -17 3 42.60 75.69 56.60 o
 -5 -17 3 89.37 13.64 52.51 o
 -2 -17 3 1240.54 1108.62 69.55 o
 -1 -17 3 224.49 278.89 38.19 o
 0 -17 3 674.40 664.10 58.64 o
 1 -17 3 837.53 769.11 72.28 o
 2 -17 3 9.67 36.82 34.09 o
 3 -17 3 327.71 276.85 57.96 o
 4 -17 3 285.45 244.80 59.32 o
 5 -17 3 625.43 376.34 72.96 o
 6 -17 3 242.18 156.84 72.96 o
 7 -17 3 251.44 243.44 90.01 o
 -8 -16 3 26.09 63.42 71.60 o
 -7 -16 3 4.39 -30.69 60.01 o
 -6 -16 3 281.49 416.57 75.69 o
 -5 -16 3 105.43 124.79 57.28 o
 -3 -16 3 1309.60 1037.02 59.32 o
 -2 -16 3 788.69 661.37 49.10 o
 -1 -16 3 18.09 40.91 23.18 o
 0 -16 3 1922.19 2003.20 111.83 o
 1 -16 3 1067.57 1068.39 79.10 o
 2 -16 3 1669.67 1352.06 99.56 o
 3 -16 3 1030.89 777.29 79.78 o
 4 -16 3 61.51 47.05 47.73 o
 5 -16 3 87.59 26.59 54.55 o
 6 -16 3 87.61 8.86 61.37 o
 7 -16 3 33.07 -12.27 63.42 o
 -8 -15 3 409.85 401.57 85.92 o
 -7 -15 3 24.16 109.10 66.83 o
 -6 -15 3 58.91 47.73 61.37 o
 -5 -15 3 429.75 624.55 82.51 o
 -3 -15 3 1086.35 1024.75 54.55 o
 -2 -15 3 1403.73 1176.13 68.87 o
 -1 -15 3 675.81 758.88 55.23 o
 0 -15 3 936.66 926.62 64.78 o
 1 -15 3 787.41 637.50 62.73 o
 2 -15 3 1852.18 1699.82 106.38 o
 3 -15 3 255.53 327.31 58.64 o
 4 -15 3 367.94 276.17 57.96 o
 5 -15 3 382.09 265.26 64.78 o
 6 -15 3 50.93 21.14 51.82 o
 7 -15 3 97.05 23.18 67.51 o
 -8 -14 3 70.53 -55.23 61.37 o
 -7 -14 3 63.65 75.69 59.32 o
 -6 -14 3 396.79 492.94 81.15 o
 -5 -14 3 77.53 117.97 53.19 o
 -4 -14 3 84.45 156.15 21.82 o
 -3 -14 3 1997.61 1857.95 98.19 o
 -2 -14 3 528.23 534.54 40.91 o
 -1 -14 3 902.58 1167.26 68.87 o
 0 -14 3 2690.62 2832.31 141.83 o
 1 -14 3 177.99 108.42 33.41 o
 2 -14 3 1204.12 1184.99 85.24 o
 3 -14 3 321.00 279.58 53.19 o
 4 -14 3 151.76 197.07 55.23 o
 5 -14 3 119.52 112.51 50.46 o
 6 -14 3 315.96 225.02 71.60 o
 7 -14 3 24.20 120.01 75.01 o
 -8 -13 3 431.46 385.88 86.60 o
 -7 -13 3 464.07 580.22 96.15 o
 -6 -13 3 1.45 84.55 55.92 o
 -4 -13 3 61.39 53.19 17.73 o
 -3 -13 3 2168.38 1967.06 98.87 o
 -2 -13 3 925.38 912.99 53.87 o
 -1 -13 3 1735.18 1739.30 95.46 o
 0 -13 3 1119.24 1281.14 78.42 o
 1 -13 3 1176.37 1022.77 75.01 o
 2 -13 3 2888.38 2862.31 156.84 o
 3 -13 3 393.42 212.07 46.37 o
 4 -13 3 1199.79 1213.63 100.24 o
 5 -13 3 12.05 -43.64 43.64 o
 6 -13 3 88.24 120.69 62.73 o
 7 -13 3 60.96 62.73 69.55 o
 -9 -12 3 325.31 391.34 94.78 o
 -8 -12 3 0.61 -25.91 57.96 o
 -7 -12 3 205.67 222.30 73.64 o
 -6 -12 3 218.47 276.17 68.87 o
 -5 -12 3 7.26 58.64 22.50 o
 -4 -12 3 747.32 754.79 49.78 o
 -3 -12 3 2377.30 2447.72 120.01 o
 -2 -12 3 1462.08 1439.34 75.01 o
 -1 -12 3 12249.07 11991.90 537.26 o
 0 -12 3 8518.77 8286.22 379.06 o
 1 -12 3 798.34 911.62 67.51 o
 2 -12 3 497.33 531.13 55.92 o
 3 -12 3 306.97 371.56 53.19 o
 4 -12 3 794.24 732.28 81.15 o
 5 -12 3 292.11 214.11 58.64 o
 6 -12 3 542.95 462.25 83.19 o
 7 -12 3 158.05 74.33 70.92 o
 -9 -11 3 95.23 172.52 70.92 o
 -8 -11 3 1.03 51.82 62.73 o
 -7 -11 3 281.08 265.94 75.01 o
 -6 -11 3 2.54 -18.41 47.73 o
 -5 -11 3 819.75 686.60 50.46 o
 -4 -11 3 545.59 474.53 38.19 o
 -3 -11 3 2734.14 2535.69 123.42 o
 -2 -11 3 2483.64 2370.05 115.92 o
 -1 -11 3 2593.49 2440.22 124.79 o
 0 -11 3 6077.60 5704.85 271.39 o
 1 -11 3 769.80 867.98 60.69 o
 2 -11 3 3638.12 3252.97 170.47 o
 3 -11 3 509.21 407.70 53.19 o
 4 -11 3 2929.28 2678.20 164.34 o
 5 -11 3 492.26 359.97 66.83 o
 6 -11 3 123.53 146.61 59.32 o
 7 -11 3 21.08 11.59 59.32 o
 -9 -10 3 306.34 331.40 88.65 o
 -8 -10 3 272.14 423.39 90.01 o
 -7 -10 3 146.86 206.61 68.87 o
 -6 -10 3 272.33 278.89 59.32 o
 -5 -10 3 193.74 205.25 32.05 o
 -4 -10 3 462.96 407.02 35.46 o
 -3 -10 3 113.92 184.11 22.50 o
 -2 -10 3 2695.76 2658.43 125.47 o
 -1 -10 3 1298.55 1829.31 92.74 o
 0 -10 3 4178.20 4063.67 198.43 o
 1 -10 3 2166.59 2079.57 113.19 o
 2 -10 3 1703.74 1915.91 107.74 o
 3 -10 3 1866.86 1579.13 105.01 o
 4 -10 3 584.57 576.13 70.92 o
 5 -10 3 214.05 144.56 48.41 o
 6 -10 3 1233.39 990.72 105.01 o
 7 -10 3 97.24 130.24 66.83 o
 -9 -9 3 21.41 12.96 60.01 o
 -8 -9 3 617.56 707.05 100.92 o
 -7 -9 3 166.80 191.61 68.87 o
 -6 -9 3 87.11 138.05 27.81 o
 -5 -9 3 3984.58 3739.84 184.79 o
 -3 -9 3 2036.87 2346.87 113.19 o
 -2 -9 3 3133.83 3227.06 148.65 o
 -1 -9 3 1841.76 1908.41 97.51 o
 0 -9 3 1004.31 1015.27 59.32 o
 1 -9 3 2321.67 2121.85 110.47 o
 2 -9 3 261.25 345.65 46.37 o
 3 -9 3 507.02 434.98 51.82 o
 4 -9 3 567.67 499.08 63.42 o
 5 -9 3 20.45 53.87 45.69 o
 6 -9 3 191.03 265.26 68.87 o
 7 -9 3 498.83 591.13 95.46 o
 8 -9 3 128.73 134.33 82.51 o
 -9 -8 3 196.00 169.79 77.74 o
 -8 -8 3 145.71 237.98 74.33 o
 -7 -8 3 332.49 440.43 79.78 o
 -6 -8 3 2535.26 2164.47 94.16 o
 -5 -8 3 931.07 1037.70 68.19 o
 -4 -8 3 475.39 527.03 40.91 o
 -3 -8 3 832.32 1063.62 61.37 o
 -2 -8 3 8101.74 8209.85 352.47 o
 -1 -8 3 715.11 887.07 55.92 o
 0 -8 3 6941.52 6589.13 300.03 o
 1 -8 3 4777.60 4428.41 200.48 o
 2 -8 3 1129.21 1183.63 78.42 o
 3 -8 3 2622.24 2672.06 141.15 o
 4 -8 3 484.01 486.12 65.46 o
 5 -8 3 579.75 430.89 65.46 o
 6 -8 3 17.46 84.55 52.51 o
 7 -8 3 18.37 -12.27 52.51 o
 8 -8 3 9.43 -66.14 66.14 o
 -9 -7 3 58.43 55.92 64.78 o
 -8 -7 3 873.69 1039.75 117.97 o
 -7 -7 3 171.33 250.94 67.51 o
 -6 -7 3 330.46 283.67 42.96 o
 -5 -7 3 488.82 528.40 49.78 o
 -4 -7 3 277.54 302.76 32.73 o
 -3 -7 3 579.28 557.85 24.41 o
 -2 -7 3 1947.52 1872.95 91.37 o
 -1 -7 3 8725.10 7753.05 364.74 o
 0 -7 3 2522.85 2484.54 120.01 o
 1 -7 3 2196.04 2167.53 110.47 o
 2 -7 3 931.68 972.31 65.46 o
 3 -7 3 1352.92 1406.61 86.60 o
 4 -7 3 146.84 139.79 44.32 o
 5 -7 3 132.71 105.69 47.73 o
 6 -7 3 101.31 124.79 58.64 o
 7 -7 3 324.44 406.34 85.24 o
 8 -7 3 99.61 173.88 81.15 o
 -9 -6 3 107.07 92.74 65.46 o
 -8 -6 3 28.75 -45.69 56.60 o
 -7 -6 3 366.89 371.56 68.19 o
 -6 -6 3 1629.62 1510.94 95.46 o
 -5 -6 3 202.90 192.98 33.41 o
 -4 -6 3 1537.10 1278.41 74.33 o
 -3 -6 3 1088.80 1164.18 44.51 o
 -2 -6 3 1446.25 1590.87 56.53 o
 -1 -6 3 1359.66 1549.81 77.74 o
 0 -6 3 1582.30 1654.14 83.87 o
 1 -6 3 240.70 207.98 29.32 o
 2 -6 3 2069.85 1916.60 101.60 o
 3 -6 3 3573.77 3366.84 173.20 o
 4 -6 3 367.04 304.12 53.19 o
 5 -6 3 813.97 733.65 85.24 o
 6 -6 3 143.08 133.65 60.01 o
 7 -6 3 19.74 -31.37 60.69 o
 8 -6 3 23.08 37.50 73.64 o
 -9 -5 3 52.95 64.10 63.42 o
 -8 -5 3 802.94 756.83 96.83 o
 -7 -5 3 419.11 478.62 79.78 o
 -6 -5 3 26.02 10.91 28.64 o
 -5 -5 3 94.99 90.69 30.00 o
 -4 -5 3 459.87 488.85 42.96 o
 -3 -5 3 437.25 624.79 47.73 o
 -2 -5 3 3185.22 2786.20 94.72 o
 -1 -5 3 4653.41 4652.08 217.52 o
 0 -5 3 4752.51 4394.39 194.34 o
 1 -5 3 1066.18 1430.47 77.74 o
 2 -5 3 1508.52 1898.87 100.92 o
 3 -5 3 271.22 331.40 46.37 o
 4 -5 3 446.80 635.46 68.19 o
 5 -5 3 723.40 639.55 79.10 o
 6 -5 3 378.64 280.26 67.51 o
 7 -5 3 165.92 145.24 70.23 o
 8 -5 3 39.81 87.28 76.37 o
 -9 -4 3 62.99 77.05 62.73 o
 -8 -4 3 32.62 130.24 57.96 o
 -7 -4 3 61.70 52.51 45.69 o
 -6 -4 3 493.05 527.72 54.55 o
 -5 -4 3 541.51 527.03 52.51 o
 -4 -4 3 19675.96 19106.77 865.25 o
 -3 -4 3 2544.63 2346.41 104.30 o
 -2 -4 3 208.61 316.80 18.64 o
 -1 -4 3 2015.76 3626.59 141.80 o
 0 -4 3 571.34 505.90 36.82 o
 1 -4 3 836.68 823.66 55.92 o
 3 -4 3 2211.37 2094.57 120.69 o
 4 -4 3 168.60 237.98 44.32 o
 5 -4 3 393.59 456.80 64.10 o
 6 -4 3 252.86 129.56 58.64 o
 7 -4 3 286.76 256.39 75.69 o
 8 -4 3 15.62 134.33 76.37 o
 -9 -3 3 45.52 -45.00 56.60 o
 -8 -3 3 164.10 171.16 64.10 o
 -7 -3 3 14.71 107.06 52.51 o
 -6 -3 3 551.40 490.89 55.92 o
 -5 -3 3 2448.49 2280.73 125.47 o
 -4 -3 3 3649.60 3676.42 177.29 o
 -3 -3 3 6091.24 5958.45 270.71 o
 -2 -3 3 4416.98 4346.06 139.10 o
 -1 -3 3 1021.23 786.26 33.26 o
 0 -3 3 3434.25 3138.41 147.29 o
 1 -3 3 2534.72 2648.20 126.15 o
 2 -3 3 1390.01 1403.20 79.78 o
 3 -3 3 485.99 567.95 55.23 o
 4 -3 3 637.21 674.32 68.87 o
 5 -3 3 1465.23 1549.12 111.15 o
 6 -3 3 109.78 129.56 55.23 o
 7 -3 3 245.98 262.53 72.96 o
 8 -3 3 61.18 147.97 77.05 o
 -9 -2 3 266.33 268.67 77.74 o
 -8 -2 3 86.34 75.69 53.87 o
 -7 -2 3 802.06 1004.36 98.19 o
 -6 -2 3 1169.04 1058.16 79.10 o
 -5 -2 3 49.33 16.37 26.59 o
 -4 -2 3 2686.54 2574.55 135.70 o
 -3 -2 3 1295.60 1277.05 72.96 o
 -2 -2 3 230.26 332.33 62.02 o
 -1 -2 3 1974.70 2360.81 81.00 o
 0 -2 3 4976.05 4005.03 184.11 o
 1 -2 3 924.00 876.85 53.19 o
 3 -2 3 1021.68 1062.93 73.64 o
 4 -2 3 435.32 374.97 53.19 o
 5 -2 3 289.95 383.16 57.96 o
 6 -2 3 978.28 906.85 96.15 o
 7 -2 3 145.89 110.47 66.83 o
 8 -2 3 75.73 113.88 74.33 o
 -9 -1 3 21.00 14.32 56.60 o
 -8 -1 3 9.93 14.32 50.46 o
 -7 -1 3 79.10 130.92 52.51 o
 -6 -1 3 41.10 27.28 31.37 o
 -5 -1 3 4604.41 4126.41 204.57 o
 -4 -1 3 2475.88 2757.98 136.38 o
 -3 -1 3 8455.82 8441.01 393.38 o
 -2 -1 3 70251.28 67025.73 2101.31 o
 -1 -1 3 1161.80 2487.48 148.28 o
 0 -1 3 739.30 672.28 39.55 o
 1 -1 3 272.80 381.11 34.09 o
 2 -1 3 2240.13 1724.30 98.19 o
 3 -1 3 842.16 844.11 64.78 o
 4 -1 3 3825.63 3540.05 186.16 o
 5 -1 3 307.86 267.30 53.19 o
 6 -1 3 15.21 27.96 46.37 o
 7 -1 3 92.48 59.32 59.32 o
 8 -1 3 137.17 186.78 57.01 o
 -9 0 3 362.40 429.52 79.78 o
 -8 0 3 41.46 27.96 51.82 o
 -7 0 3 2341.87 2357.10 147.97 o
 -6 0 3 17.85 16.37 31.37 o
 -5 0 3 543.65 657.96 62.73 o
 -4 0 3 551.44 698.19 54.55 o
 -3 0 3 14315.04 14151.93 640.91 o
 -2 0 3 47425.95 36504.24 1153.48 o
 -1 0 3 94.23 151.76 7.07 o
 0 0 3 3912.92 2927.87 98.10 o
 1 0 3 198.51 150.70 24.55 o
 2 0 3 3317.61 3246.15 161.61 o
 3 0 3 297.34 195.02 33.41 o
 4 0 3 332.99 294.58 47.73 o
 5 0 3 175.38 131.61 47.05 o
 6 0 3 1272.42 1154.99 107.06 o
 7 0 3 164.01 220.25 66.83 o
 8 0 3 117.50 160.85 68.87 o
 -9 1 3 21.00 73.64 60.01 o
 -8 1 3 9.93 -46.37 46.37 o
 -7 1 3 79.10 135.70 48.41 o
 -6 1 3 41.10 2.05 32.05 o
 -5 1 3 4604.41 3998.89 205.25 o
 -4 1 3 2475.88 2455.22 136.38 o
 -3 1 3 8455.83 8685.06 395.43 o
 -2 1 3 70251.27 66560.60 1711.94 o
 -1 1 3 1161.80 2451.70 104.91 o
 0 1 3 739.30 518.56 56.35 o
 1 1 3 272.80 291.43 21.93 o
 2 1 3 2240.13 1881.82 98.19 o
 3 1 3 842.16 797.75 61.37 o
 4 1 3 3825.63 3505.95 184.11 o
 5 1 3 307.86 300.03 54.55 o
 6 1 3 15.21 -41.60 41.60 o
 7 1 3 92.48 106.01 45.89 o
 8 1 3 137.17 187.08 54.94 o
 -9 2 3 266.33 393.66 58.00 o
 -8 2 3 86.34 2.73 47.73 o
 -7 2 3 802.06 730.24 82.51 o
 -6 2 3 1169.04 1174.76 85.24 o
 -5 2 3 49.33 58.64 32.05 o
 -4 2 3 2686.53 2727.98 140.47 o
 -3 2 3 1295.60 1280.46 77.05 o
 -2 2 3 230.26 310.90 49.06 o
 -1 2 3 1974.70 2355.03 114.57 o
 0 2 3 4976.05 3860.47 105.86 o
 1 2 3 924.00 755.50 35.38 o
 2 2 3 134.50 604.77 45.00 o
 3 2 3 1021.68 1001.79 122.37 o
 4 2 3 435.32 355.87 36.08 o
 5 2 3 289.95 266.24 97.51 o
 6 2 3 978.28 835.00 102.62 o
 7 2 3 145.89 208.83 49.61 o
 8 2 3 75.73 171.84 80.46 o
 -9 3 3 45.52 156.15 75.01 o
 -8 3 3 164.10 164.59 57.28 o
 -7 3 3 14.71 25.91 40.91 o
 -6 3 3 551.40 528.40 63.42 o
 -5 3 3 2448.49 2273.23 129.56 o
 -4 3 3 3649.59 3518.22 182.07 o
 -3 3 3 6091.25 5620.98 273.44 o
 -2 3 3 4416.98 4161.12 98.99 o
 -1 3 3 1021.23 887.65 38.76 o
 0 3 3 3434.25 3028.69 84.74 o
 1 3 3 2534.71 2393.15 87.47 o
 2 3 3 1390.01 1257.19 54.53 o
 3 3 3 485.99 471.75 65.46 o
 4 3 3 637.21 699.13 126.15 o
 5 3 3 1465.23 1513.60 78.31 o
 6 3 3 109.78 98.19 53.53 o
 7 3 3 245.98 329.03 53.42 o
 8 3 3 61.18 51.82 72.96 o
 -9 4 3 62.99 64.78 69.55 o
 -8 4 3 32.62 27.74 42.96 o
 -7 4 3 61.70 82.98 33.20 o
 -6 4 3 493.05 389.29 57.96 o
 -5 4 3 541.51 449.30 53.87 o
 -4 4 3 19675.93 19299.06 872.07 o
 -3 4 3 2544.63 2266.76 68.58 o
 -2 4 3 208.61 303.65 31.28 o
 -1 4 3 2015.76 3279.25 92.03 o
 0 4 3 571.34 523.15 21.46 o
 1 4 3 836.67 845.22 37.46 o
 2 4 3 108.66 172.79 20.42 o
 3 4 3 2211.37 2080.32 83.15 o
 4 4 3 168.59 260.11 31.84 o
 5 4 3 393.59 385.96 43.39 o
 6 4 3 252.86 225.01 82.85 o
 7 4 3 286.76 388.78 56.10 o
 8 4 3 15.62 23.87 72.96 o
 -9 5 3 52.95 79.10 69.55 o
 -8 5 3 802.94 930.07 70.43 o
 -7 5 3 419.11 570.25 51.55 o
 -6 5 3 26.02 3.49 25.04 o
 -5 5 3 94.99 97.74 25.98 o
 -4 5 3 459.88 419.44 33.51 o
 -3 5 3 437.26 550.65 58.28 o
 -2 5 3 3185.23 2875.17 69.40 o
 -1 5 3 4653.40 4674.02 108.15 o
 0 5 3 4752.50 4009.44 95.69 o
 1 5 3 1066.18 1287.13 52.18 o
 2 5 3 1508.53 1613.74 65.59 o
 3 5 3 271.22 300.76 32.05 o
 4 5 3 446.80 616.38 92.06 o
 5 5 3 723.40 732.61 54.82 o
 6 5 3 378.64 402.04 100.89 o
 7 5 3 165.92 240.71 76.37 o
 8 5 3 39.81 37.50 70.92 o
 -9 6 3 107.07 131.61 73.64 o
 -8 6 3 28.75 61.37 58.64 o
 -7 6 3 366.89 414.31 45.41 o
 -6 6 3 1629.62 1654.96 165.32 o
 -5 6 3 202.90 133.06 27.24 o
 -4 6 3 1537.10 1292.90 58.99 o
 -3 6 3 1088.80 1206.75 45.31 o
 -2 6 3 1446.25 1671.79 43.58 o
 -1 6 3 1359.67 1458.97 65.35 o
 0 6 3 1582.30 1530.10 69.08 o
 1 6 3 240.69 238.03 17.11 o
 2 6 3 2069.85 1608.70 65.92 o
 3 6 3 3573.76 3221.30 119.07 o
 4 6 3 367.04 334.61 50.43 o
 5 6 3 813.98 870.44 57.18 o
 6 6 3 143.08 118.90 37.18 o
 7 6 3 19.74 -57.28 57.28 o
 8 6 3 23.08 45.00 72.28 o
 -9 7 3 58.43 34.78 66.83 o
 -8 7 3 873.69 1036.34 113.19 o
 -7 7 3 171.33 172.43 41.60 o
 -6 7 3 330.46 299.30 55.54 o
 -5 7 3 488.83 475.23 41.33 o
 -4 7 3 277.53 275.36 56.26 o
 -3 7 3 579.28 514.66 24.22 o
 -2 7 3 1947.50 1817.27 48.11 o
 -1 7 3 8725.12 8056.59 182.74 o
 0 7 3 2522.85 2322.42 58.58 o
 1 7 3 2196.04 1993.20 61.41 o
 2 7 3 931.67 858.40 42.27 o
 3 7 3 1352.94 1046.74 53.08 o
 4 7 3 146.84 190.95 27.61 o
 5 7 3 132.70 109.53 43.64 o
 6 7 3 101.31 159.34 43.64 o
 7 7 3 324.44 244.80 77.05 o
 8 7 3 99.61 116.60 82.51 o
 -9 8 3 196.00 376.34 85.24 o
 -8 8 3 145.71 156.15 64.10 o
 -7 8 3 332.49 280.94 62.73 o
 -6 8 3 2535.26 2449.08 223.97 o
 -5 8 3 931.07 1059.13 59.06 o
 -4 8 3 475.39 484.70 31.49 o
 -3 8 3 832.32 1125.22 35.99 o
 -2 8 3 8101.72 7618.59 178.83 o
 -1 8 3 715.12 968.49 28.26 o
 0 8 3 6941.50 6406.21 149.13 o
 1 8 3 4777.61 3965.46 97.70 o
 2 8 3 1129.22 1094.49 49.14 o
 3 8 3 2622.24 2363.81 101.57 o
 4 8 3 484.01 505.00 39.34 o
 5 8 3 579.76 538.01 73.30 o
 6 8 3 17.46 76.37 58.64 o
 7 8 3 18.37 80.46 67.51 o
 8 8 3 9.43 -5.46 66.83 o
 -9 9 3 21.41 47.05 70.23 o
 -8 9 3 617.56 720.69 96.15 o
 -7 9 3 166.80 200.48 59.32 o
 -6 9 3 87.11 119.58 34.35 o
 -5 9 3 3984.57 3803.07 139.83 o
 -4 9 3 330.91 420.64 38.53 o
 -3 9 3 2036.86 2281.92 62.25 o
 -2 9 3 3133.83 3104.42 77.48 o
 -1 9 3 1841.75 1892.53 49.31 o
 0 9 3 1004.32 866.83 28.97 o
 1 9 3 2321.68 1954.19 52.80 o
 2 9 3 261.26 273.77 62.05 o
 3 9 3 507.02 464.40 38.87 o
 4 9 3 567.68 640.57 43.14 o
 5 9 3 20.45 49.31 27.50 o
 6 9 3 191.03 214.11 63.42 o
 7 9 3 498.83 393.38 87.96 o
 8 9 3 128.73 127.51 79.10 o
 -9 10 3 306.34 478.62 92.06 o
 -8 10 3 272.14 327.31 76.37 o
 -7 10 3 146.86 96.15 53.87 o
 -6 10 3 272.33 278.71 34.08 o
 -5 10 3 193.74 173.34 33.41 o
 -4 10 3 462.96 385.24 29.42 o
 -3 10 3 113.92 208.84 17.34 o
 -2 10 3 2695.76 2559.35 68.49 o
 -1 10 3 1298.55 1756.91 56.77 o
 0 10 3 4178.20 4136.48 99.07 o
 1 10 3 2166.59 2039.90 54.41 o
 2 10 3 1703.74 1727.35 118.27 o
 3 10 3 1866.86 1574.81 66.35 o
 4 10 3 584.57 561.21 40.22 o
 5 10 3 214.05 211.39 62.73 o
 6 10 3 1233.40 1286.59 124.10 o
 7 10 3 97.24 78.42 66.83 o
 -9 11 3 95.23 70.92 69.55 o
 -8 11 3 1.03 -18.41 53.19 o
 -7 11 3 281.08 367.47 67.51 o
 -6 11 3 2.54 -17.73 40.91 o
 -5 11 3 819.75 713.66 51.79 o
 -4 11 3 545.59 569.05 60.01 o
 -3 11 3 2734.13 2544.31 68.54 o
 -2 11 3 2483.63 2360.59 62.19 o
 -1 11 3 2593.51 2526.53 64.18 o
 0 11 3 6077.67 5768.32 135.48 o
 1 11 3 769.80 706.71 28.54 o
 2 11 3 3638.12 3178.18 125.09 o
 3 11 3 509.21 431.51 33.75 o
 4 11 3 2929.29 2837.57 107.82 o
 5 11 3 492.26 373.61 71.60 o
 6 11 3 123.53 94.78 61.37 o
 7 11 3 21.08 65.46 69.55 o
 -9 12 3 325.31 517.49 94.10 o
 -8 12 3 0.61 -5.46 53.19 o
 -7 12 3 205.67 229.12 62.73 o
 -6 12 3 218.47 256.39 55.23 o
 -5 12 3 7.26 36.13 22.61 o
 -4 12 3 747.32 880.35 41.38 o
 -3 12 3 2377.29 2496.75 67.86 o
 -2 12 3 1462.07 1434.69 42.72 o
 -1 12 3 12249.08 11808.53 270.38 o
 0 12 3 8518.76 8161.83 189.23 o
 1 12 3 798.34 904.99 35.08 o
 2 12 3 497.34 594.54 63.32 o
 3 12 3 306.96 434.27 33.75 o
 4 12 3 794.25 826.39 87.96 o
 5 12 3 292.11 324.58 66.83 o
 6 12 3 542.95 520.90 83.87 o
 7 12 3 158.05 263.21 79.78 o
 -8 13 3 431.46 501.80 85.24 o
 -7 13 3 464.07 615.00 83.19 o
 -6 13 3 1.45 -23.18 39.55 o
 -5 13 3 497.64 432.78 36.83 o
 -4 13 3 61.39 65.55 19.48 o
 -3 13 3 2168.37 2012.38 58.34 o
 -2 13 3 925.38 913.48 32.67 o
 -1 13 3 1735.19 1790.35 49.89 o
 0 13 3 1119.25 1307.20 70.71 o
 1 13 3 1176.36 1102.75 35.44 o
 2 13 3 2888.38 2855.67 89.89 o
 3 13 3 393.42 421.29 29.03 o
 4 13 3 1199.79 1095.67 106.38 o
 5 13 3 12.05 -16.37 50.46 o
 6 13 3 88.24 15.68 60.01 o
 7 13 3 60.96 40.91 68.19 o
 -8 14 3 70.53 73.64 60.01 o
 -7 14 3 63.65 110.47 55.23 o
 -6 14 3 396.79 385.88 68.19 o
 -5 14 3 77.53 103.11 45.68 o
 -4 14 3 84.45 126.35 20.56 o
 -3 14 3 1997.61 2080.05 72.64 o
 -2 14 3 528.24 630.01 51.18 o
 -1 14 3 902.57 1101.44 36.33 o
 0 14 3 2690.63 2722.52 71.00 o
 1 14 3 177.99 193.41 18.92 o
 2 14 3 1204.11 1103.07 46.47 o
 3 14 3 321.00 429.52 64.10 o
 4 14 3 151.76 216.84 57.96 o
 5 14 3 119.52 203.89 63.42 o
 6 14 3 315.96 293.90 77.05 o
 7 14 3 24.20 81.15 72.28 o
 -8 15 3 409.85 332.76 77.05 o
 -7 15 3 24.16 113.88 57.96 o
 -6 15 3 58.91 71.60 49.10 o
 -5 15 3 429.75 490.21 49.60 o
 -4 15 3 21.04 78.27 19.96 o
 -3 15 3 1086.35 955.48 51.85 o
 -2 15 3 1403.73 1248.74 40.78 o
 -1 15 3 675.80 805.55 31.00 o
 0 15 3 936.66 951.30 37.59 o
 1 15 3 787.41 723.59 29.46 o
 2 15 3 1852.16 1641.07 49.24 o
 3 15 3 255.54 291.17 58.64 o
 4 15 3 367.94 368.84 64.78 o
 5 15 3 382.09 342.92 73.64 o
 6 15 3 50.93 93.42 68.87 o
 7 15 3 97.05 195.02 82.51 o
 -8 16 3 26.09 64.10 60.69 o
 -7 16 3 4.39 25.23 51.82 o
 -6 16 3 281.49 297.31 62.73 o
 -5 16 3 105.43 114.65 34.07 o
 -4 16 3 337.71 337.29 27.57 o
 -3 16 3 1309.59 1179.98 42.64 o
 -2 16 3 788.69 833.78 33.15 o
 -1 16 3 18.09 45.21 13.48 o
 0 16 3 1922.19 2008.53 56.55 o
 1 16 3 1067.57 1052.91 36.01 o
 2 16 3 1669.67 1453.25 47.95 o
 3 16 3 1030.90 789.56 79.10 o
 4 16 3 61.51 126.83 56.60 o
 5 16 3 87.59 141.15 62.05 o
 6 16 3 87.61 192.29 72.96 o
 7 16 3 33.07 79.78 74.33 o
 -8 17 3 68.68 91.37 63.42 o
 -7 17 3 15.26 -29.32 49.78 o
 -6 17 3 42.60 68.87 50.46 o
 -5 17 3 89.37 66.10 33.30 o
 -4 17 3 30.44 109.73 21.87 o
 -3 17 3 78.49 130.86 20.72 o
 -2 17 3 1240.54 1300.56 42.97 o
 -1 17 3 224.50 289.36 21.74 o
 0 17 3 674.39 594.12 28.66 o
 1 17 3 837.53 730.48 31.30 o
 2 17 3 9.67 11.35 19.78 o
 3 17 3 327.71 320.58 41.82 o
 4 17 3 285.45 349.74 70.92 o
 5 17 3 625.43 518.17 81.15 o
 6 17 3 242.18 249.57 79.10 o
 7 17 3 251.44 259.80 88.65 o
 -8 18 3 9.33 15.00 59.32 o
 -7 18 3 2.15 8.18 55.23 o
 -6 18 3 178.34 207.30 57.96 o
 -5 18 3 47.00 43.19 41.84 o
 -4 18 3 464.20 382.32 35.37 o
 -3 18 3 189.66 196.69 30.31 o
 -2 18 3 386.93 478.90 37.89 o
 -1 18 3 61.20 55.45 12.98 o
 0 18 3 304.55 288.80 22.73 o
 1 18 3 319.02 388.24 23.36 o
 2 18 3 301.46 263.14 29.49 o
 3 18 3 1568.42 1487.79 174.91 o
 4 18 3 245.12 223.66 56.60 o
 5 18 3 384.74 278.21 72.28 o
 6 18 3 29.84 -51.14 61.37 o
 -8 19 3 42.77 -32.05 59.32 o
 -7 19 3 25.33 83.19 57.28 o
 -6 19 3 169.57 145.24 60.69 o
 -5 19 3 92.89 116.92 31.88 o
 -4 19 3 34.29 80.04 27.14 o
 -3 19 3 479.56 411.56 36.77 o
 -2 19 3 2556.01 2306.85 67.47 o
 -1 19 3 634.64 656.35 44.82 o
 0 19 3 278.69 259.45 24.51 o
 1 19 3 603.16 630.50 31.54 o
 2 19 3 134.73 213.19 28.97 o
 3 19 3 11.29 80.96 33.74 o
 4 19 3 49.86 60.01 51.14 o
 5 19 3 513.50 544.76 82.51 o
 6 19 3 123.60 277.53 83.87 o
 -7 20 3 7.26 83.19 60.01 o
 -6 20 3 242.64 239.38 57.85 o
 -5 20 3 83.11 85.26 30.75 o
 -4 20 3 2643.71 2510.52 142.72 o
 -3 20 3 1317.14 1255.60 56.38 o
 -2 20 3 18.55 40.07 18.06 o
 -1 20 3 1348.85 1235.02 41.78 o
 0 20 3 255.49 295.69 23.02 o
 1 20 3 271.22 333.23 31.63 o
 2 20 3 58.52 28.13 23.60 o
 3 20 3 659.09 641.02 74.67 o
 4 20 3 336.52 336.85 68.19 o
 5 20 3 206.11 177.29 64.10 o
 6 20 3 29.95 32.73 66.83 o
 -7 21 3 9.00 -17.38 57.62 o
 -6 21 3 21.33 11.65 33.12 o
 -5 21 3 367.63 382.44 42.31 o
 -4 21 3 715.07 572.43 61.17 o
 -3 21 3 205.42 267.20 32.71 o
 -2 21 3 332.44 340.28 27.97 o
 -1 21 3 219.71 314.19 39.45 o
 0 21 3 199.42 228.61 22.62 o
 1 21 3 1010.07 925.31 50.73 o
 2 21 3 474.38 545.27 40.78 o
 3 21 3 70.32 62.14 40.57 o
 4 21 3 203.19 267.98 64.78 o
 5 21 3 176.02 189.57 68.87 o
 6 21 3 61.88 87.96 68.19 o
 -7 22 3 93.10 66.68 51.08 o
 -6 22 3 43.05 34.53 35.52 o
 -5 22 3 24.20 -5.80 30.97 o
 -4 22 3 88.93 115.73 32.15 o
 -3 22 3 9.06 48.32 27.94 o
 -2 22 3 56.86 64.45 25.76 o
 -1 22 3 944.58 875.55 48.14 o
 0 22 3 441.35 371.48 33.49 o
 1 22 3 50.40 65.00 25.44 o
 2 22 3 152.04 172.67 39.57 o
 3 22 3 128.35 191.71 43.64 o
 4 22 3 150.53 96.15 58.64 o
 5 22 3 193.55 42.28 62.05 o
 6 22 3 245.55 233.89 79.10 o
 -7 23 3 10.91 -10.51 63.76 o
 -6 23 3 26.95 46.53 37.56 o
 -5 23 3 410.22 420.71 45.22 o
 -4 23 3 118.62 88.45 38.30 o
 -3 23 3 750.16 640.57 47.25 o
 -2 23 3 85.94 81.56 40.73 o
 -1 23 3 1846.04 1682.38 67.24 o
 0 23 3 258.10 223.72 34.74 o
 1 23 3 134.96 167.30 43.66 o
 2 23 3 437.27 428.04 39.71 o
 3 23 3 201.13 193.05 44.60 o
 4 23 3 103.08 138.42 62.73 o
 5 23 3 7.48 64.78 64.78 o
 -6 24 3 22.77 -16.51 36.45 o
 -5 24 3 63.19 182.65 39.04 o
 -4 24 3 411.88 417.02 44.17 o
 -3 24 3 228.46 250.74 40.46 o
 -2 24 3 1243.06 1149.93 72.86 o
 -1 24 3 67.27 112.03 37.01 o
 0 24 3 597.71 569.70 42.18 o
 1 24 3 38.88 48.25 27.02 o
 2 24 3 450.43 417.99 55.58 o
 3 24 3 46.44 94.03 62.05 o
 4 24 3 103.78 21.14 60.01 o
 5 24 3 71.26 117.97 67.51 o
 -6 25 3 15.08 19.58 38.99 o
 -5 25 3 114.04 163.80 38.79 o
 -4 25 3 64.77 111.91 64.43 o
 -3 25 3 312.36 365.76 45.87 o
 -2 25 3 1276.90 1238.30 77.91 o
 -1 25 3 20.31 86.07 28.46 o
 0 25 3 71.03 90.20 28.67 o
 1 25 3 48.49 71.96 28.85 o
 2 25 3 51.51 61.74 37.57 o
 3 25 3 34.66 69.41 42.91 o
 4 25 3 197.34 188.20 72.28 o
 5 25 3 170.70 271.39 79.10 o
 -6 26 3 50.03 -13.13 39.87 o
 -5 26 3 131.36 129.87 39.32 o
 -4 26 3 112.64 151.99 38.12 o
 -3 26 3 448.87 446.15 45.19 o
 -2 26 3 57.84 25.76 29.72 o
 -1 26 3 83.07 38.60 27.54 o
 0 26 3 309.19 330.05 37.80 o
 1 26 3 117.03 126.68 35.16 o
 2 26 3 34.42 82.69 39.72 o
 3 26 3 62.18 64.22 61.71 o
 4 26 3 15.57 131.61 69.55 o
 5 26 3 17.45 31.37 71.60 o
 -5 27 3 88.04 140.28 41.95 o
 -4 27 3 19.97 57.33 35.58 o
 -3 27 3 246.03 275.02 42.23 o
 -2 27 3 117.26 105.98 33.09 o
 -1 27 3 11.24 1.90 30.00 o
 0 27 3 28.70 25.56 29.73 o
 1 27 3 62.91 77.07 32.15 o
 2 27 3 25.57 4.71 38.56 o
 3 27 3 31.90 7.16 42.43 o
 4 27 3 138.66 152.50 52.07 o
 -5 28 3 60.53 58.30 39.81 o
 -4 28 3 19.49 -34.96 35.37 o
 -3 28 3 77.99 110.19 36.62 o
 -2 28 3 13.08 35.58 31.16 o
 -1 28 3 1.26 29.56 30.93 o
 0 28 3 284.09 255.46 38.29 o
 1 28 3 241.47 280.47 58.30 o
 2 28 3 20.04 45.67 47.73 o
 3 28 3 73.22 74.81 48.76 o
 4 28 3 95.33 73.70 49.90 o
 -5 29 3 13.35 33.65 41.72 o
 -4 29 3 14.13 -2.17 36.45 o
 -3 29 3 35.57 17.58 38.31 o
 -2 29 3 12.16 31.08 33.70 o
 -1 29 3 100.82 99.90 55.37 o
 0 29 3 10.44 66.14 33.00 o
 1 29 3 59.99 23.56 40.16 o
 2 29 3 9.45 5.49 42.84 o
 3 29 3 23.24 -41.00 52.51 o
 -4 30 3 7.19 54.59 41.43 o
 -3 30 3 37.10 119.03 41.32 o
 -2 30 3 46.88 91.07 38.34 o
 -1 30 3 24.47 51.80 35.03 o
 0 30 3 90.80 56.58 39.50 o
 1 30 3 118.96 101.53 45.32 o
 2 30 3 106.50 84.09 47.45 o
 3 30 3 49.17 74.99 49.64 o
 -3 31 3 11.11 -24.25 39.95 o
 -2 31 3 59.05 49.80 43.71 o
 -1 31 3 262.55 225.97 69.00 o
 0 31 3 17.02 52.24 74.67 o
 1 31 3 90.46 164.52 67.17 o
 2 31 3 0.47 -42.62 42.62 o
 -3 32 3 33.80 -34.20 39.49 o
 -2 32 3 36.22 96.62 40.83 o
 -1 32 3 9.63 -23.41 41.21 o
 0 32 3 12.33 -6.07 40.91 o
 1 32 3 6.39 -41.43 41.43 o
 -2 33 3 40.77 -29.52 38.05 o
 -1 33 3 18.94 -6.01 46.50 o
 0 33 3 24.88 2.16 43.47 o
 -4 -30 4 22.52 -32.05 61.37 o
 2 -30 4 34.01 77.05 65.46 o
 -4 -29 4 35.13 -2.05 64.10 o
 -3 -29 4 101.02 108.42 60.69 o
 2 -29 4 23.11 24.55 62.73 o
 3 -29 4 42.37 125.47 81.83 o
 -5 -28 4 38.52 51.14 70.23 o
 -4 -28 4 7.55 19.77 61.37 o
 -3 -28 4 3.26 -47.05 47.05 o
 1 -28 4 314.80 330.72 71.60 o
 2 -28 4 84.42 155.47 68.87 o
 3 -28 4 117.40 115.92 75.01 o
 -5 -27 4 7.55 83.19 70.23 o
 -4 -27 4 218.05 208.66 68.87 o
 -3 -27 4 85.12 119.33 57.96 o
 1 -27 4 2.91 53.19 52.51 o
 2 -27 4 62.24 3.41 61.37 o
 3 -27 4 290.90 383.16 90.01 o
 4 -27 4 73.77 190.93 83.19 o
 -6 -26 4 94.07 84.55 80.46 o
 -5 -26 4 38.96 -42.28 62.05 o
 -4 -26 4 214.34 215.48 70.23 o
 -3 -26 4 25.83 64.10 51.82 o
 -2 -26 4 177.02 200.48 55.92 o
 0 -26 4 326.65 366.79 63.42 o
 1 -26 4 271.40 236.62 64.10 o
 2 -26 4 53.26 -17.73 56.60 o
 3 -26 4 13.19 17.73 65.46 o
 4 -26 4 15.75 171.84 83.19 o
 -6 -25 4 222.81 298.67 87.96 o
 -5 -25 4 22.09 77.05 63.42 o
 -4 -25 4 24.07 34.09 55.92 o
 -3 -25 4 5.66 42.96 49.78 o
 -2 -25 4 261.38 467.71 65.46 o
 0 -25 4 261.33 426.80 62.73 o
 1 -25 4 27.80 32.73 48.41 o
 2 -25 4 128.50 142.52 61.37 o
 3 -25 4 78.86 171.84 69.55 o
 4 -25 4 108.07 88.65 81.83 o
 -6 -24 4 18.40 85.92 63.42 o
 -5 -24 4 56.69 27.96 63.42 o
 -4 -24 4 47.62 -41.60 53.19 o
 -3 -24 4 421.50 448.62 70.23 o
 -2 -24 4 432.60 282.99 56.60 o
 0 -24 4 534.30 683.19 77.74 o
 1 -24 4 5.69 34.78 45.69 o
 2 -24 4 58.59 182.75 61.37 o
 3 -24 4 98.82 240.03 68.19 o
 4 -24 4 78.75 75.69 73.64 o
 5 -24 4 45.60 8.18 81.15 o
 -7 -23 4 103.20 61.37 69.55 o
 -6 -23 4 39.07 -2.73 65.46 o
 -5 -23 4 46.34 85.24 56.60 o
 -4 -23 4 150.47 163.65 63.42 o
 -3 -23 4 57.05 100.24 49.78 o
 -1 -23 4 8.11 -17.73 33.41 o
 0 -23 4 232.78 256.39 51.82 o
 1 -23 4 289.68 383.84 66.83 o
 2 -23 4 1207.46 1026.11 105.01 o
 3 -23 4 11.63 25.23 55.92 o
 4 -23 4 48.39 30.00 75.01 o
 5 -23 4 30.25 62.05 79.10 o
 -7 -22 4 115.17 101.60 70.23 o
 -6 -22 4 2.63 2.73 68.19 o
 -5 -22 4 163.24 7.50 57.96 o
 -4 -22 4 8.32 122.74 54.55 o
 -1 -22 4 28.81 10.23 32.05 o
 0 -22 4 189.03 265.94 51.82 o
 1 -22 4 256.97 337.54 61.37 o
 2 -22 4 46.44 75.69 49.10 o
 3 -22 4 44.42 47.73 53.19 o
 4 -22 4 272.63 394.75 91.37 o
 5 -22 4 38.03 26.59 75.01 o
 -7 -21 4 48.68 57.96 69.55 o
 -6 -21 4 78.33 125.47 75.01 o
 -5 -21 4 243.08 218.89 64.78 o
 -1 -21 4 533.04 700.24 67.51 o
 0 -21 4 78.73 96.15 40.23 o
 1 -21 4 343.08 342.92 61.37 o
 2 -21 4 199.49 229.80 57.96 o
 3 -21 4 322.36 399.52 75.69 o
 4 -21 4 20.01 42.96 65.46 o
 5 -21 4 30.87 -29.32 64.10 o
 6 -21 4 11.98 83.19 77.74 o
 -7 -20 4 94.81 186.16 77.74 o
 -6 -20 4 185.24 98.87 68.87 o
 -5 -20 4 321.80 406.34 76.37 o
 -2 -20 4 1249.13 915.03 72.96 o
 -1 -20 4 1413.48 1433.20 92.74 o
 0 -20 4 294.96 342.92 52.51 o
 1 -20 4 424.59 442.48 62.73 o
 2 -20 4 356.02 364.74 68.87 o
 3 -20 4 101.63 139.79 62.05 o
 4 -20 4 571.79 542.04 89.33 o
 5 -20 4 118.09 200.48 83.19 o
 6 -20 4 102.29 10.23 82.51 o
 -8 -19 4 65.05 66.83 71.60 o
 -7 -19 4 102.54 38.19 70.92 o
 -6 -19 4 15.40 84.55 66.83 o
 -5 -19 4 132.48 184.11 57.28 o
 -2 -19 4 308.46 331.40 42.28 o
 -1 -19 4 1819.72 1948.64 110.47 o
 0 -19 4 1014.05 953.22 79.78 o
 1 -19 4 248.84 353.83 57.96 o
 2 -19 4 94.56 235.93 55.92 o
 3 -19 4 209.29 156.15 61.37 o
 4 -19 4 24.49 -16.37 57.96 o
 5 -19 4 60.95 75.01 69.55 o
 6 -19 4 291.52 435.66 99.56 o
 -8 -18 4 113.07 154.79 82.51 o
 -7 -18 4 250.04 372.25 82.51 o
 -6 -18 4 736.71 602.04 90.69 o
 -2 -18 4 91.39 145.24 31.37 o
 -1 -18 4 62.19 160.93 34.09 o
 0 -18 4 432.22 490.89 56.60 o
 1 -18 4 412.24 278.89 51.82 o
 2 -18 4 211.42 356.56 60.69 o
 3 -18 4 384.20 415.89 74.33 o
 4 -18 4 179.29 150.02 66.83 o
 5 -18 4 20.27 12.27 66.14 o
 6 -18 4 145.22 129.56 85.24 o
 -8 -17 4 328.86 274.12 85.92 o
 -7 -17 4 339.18 434.98 86.60 o
 -6 -17 4 275.99 254.35 70.23 o
 -3 -17 4 1086.38 968.22 61.37 o
 -2 -17 4 302.71 317.76 39.55 o
 -1 -17 4 831.16 677.05 59.32 o
 0 -17 4 376.92 342.24 48.41 o
 1 -17 4 1206.66 1177.49 93.42 o
 2 -17 4 135.40 195.70 49.78 o
 3 -17 4 635.59 726.83 87.96 o
 4 -17 4 43.21 102.28 64.10 o
 5 -17 4 173.09 128.88 66.83 o
 6 -17 4 218.03 152.74 74.33 o
 -8 -16 4 26.54 -40.23 68.87 o
 -7 -16 4 65.92 141.15 75.01 o
 -6 -16 4 295.36 191.61 67.51 o
 -3 -16 4 861.53 924.58 60.01 o
 -2 -16 4 480.35 555.67 50.46 o
 -1 -16 4 350.39 426.11 45.69 o
 0 -16 4 761.75 872.07 67.51 o
 1 -16 4 1288.47 1339.10 93.42 o
 2 -16 4 17.05 169.11 49.10 o
 3 -16 4 1524.23 1557.31 123.42 o
 4 -16 4 85.45 45.69 50.46 o
 5 -16 4 142.29 111.83 68.87 o
 6 -16 4 62.00 5.46 70.23 o
 -8 -15 4 178.43 197.75 83.19 o
 -7 -15 4 419.20 433.62 81.15 o
 -6 -15 4 400.64 420.66 79.10 o
 -4 -15 4 1122.90 1141.35 70.23 o
 -3 -15 4 2377.17 2389.76 122.06 o
 -2 -15 4 408.19 467.71 46.37 o
 -1 -15 4 330.65 415.89 43.64 o
 0 -15 4 1076.43 1049.98 75.69 o
 1 -15 4 208.99 266.62 45.69 o
 2 -15 4 414.15 531.81 69.55 o
 3 -15 4 20.57 81.83 49.10 o
 4 -15 4 128.23 112.51 55.23 o
 5 -15 4 1055.84 1039.07 120.69 o
 6 -15 4 56.59 -47.73 65.46 o
 7 -15 4 12.29 -9.55 68.87 o
 -8 -14 4 117.26 8.86 70.92 o
 -7 -14 4 437.94 585.00 95.46 o
 -4 -14 4 981.94 807.29 55.92 o
 -3 -14 4 103.21 162.97 25.23 o
 -2 -14 4 1673.47 1661.64 94.78 o
 -1 -14 4 373.38 370.20 42.28 o
 0 -14 4 1272.02 1385.47 87.96 o
 1 -14 4 214.66 255.71 43.64 o
 2 -14 4 1218.64 1470.02 100.24 o
 3 -14 4 243.53 394.75 66.14 o
 4 -14 4 49.71 23.87 51.82 o
 5 -14 4 181.81 127.51 66.83 o
 6 -14 4 188.09 402.93 90.69 o
 7 -14 4 203.59 257.76 83.87 o
 -8 -13 4 6.28 12.27 61.37 o
 -7 -13 4 100.38 229.80 67.51 o
 -4 -13 4 1064.29 1094.30 68.19 o
 -3 -13 4 414.22 477.26 38.87 o
 -2 -13 4 323.91 521.58 45.69 o
 -1 -13 4 271.55 317.76 38.19 o
 0 -13 4 1515.78 1457.75 90.01 o
 1 -13 4 301.50 203.20 43.64 o
 2 -13 4 1360.89 1397.06 97.51 o
 3 -13 4 534.60 730.24 81.15 o
 4 -13 4 470.25 610.91 81.15 o
 5 -13 4 94.28 87.28 59.32 o
 6 -13 4 20.06 116.60 71.60 o
 7 -13 4 0.67 18.41 69.55 o
 -9 -12 4 156.33 120.69 75.69 o
 -8 -12 4 169.52 165.02 71.60 o
 -7 -12 4 411.67 359.29 82.51 o
 -5 -12 4 193.26 209.34 32.05 o
 -4 -12 4 893.66 845.48 57.28 o
 -3 -12 4 708.93 559.77 42.28 o
 -2 -12 4 1397.13 1123.62 70.92 o
 -1 -12 4 2894.66 3133.64 156.84 o
 0 -12 4 377.47 319.13 41.60 o
 1 -12 4 96.13 242.75 41.60 o
 2 -12 4 2112.67 2155.94 132.97 o
 3 -12 4 679.69 784.11 84.55 o
 4 -12 4 999.84 985.95 100.24 o
 5 -12 4 426.69 480.67 84.55 o
 6 -12 4 356.64 296.62 81.15 o
 7 -12 4 144.93 226.39 83.19 o
 -9 -11 4 3.26 51.14 71.60 o
 -8 -11 4 110.82 112.51 66.83 o
 -7 -11 4 13.05 30.00 57.96 o
 -5 -11 4 785.86 700.24 55.92 o
 -4 -11 4 1696.54 1990.24 104.33 o
 -3 -11 4 487.66 655.91 45.69 o
 -2 -11 4 326.09 355.20 35.46 o
 -1 -11 4 569.02 490.21 45.00 o
 0 -11 4 379.69 317.08 38.19 o
 1 -11 4 2407.27 2456.59 138.42 o
 2 -11 4 1516.91 1577.08 100.24 o
 3 -11 4 1375.25 1271.59 100.92 o
 4 -11 4 500.05 469.07 73.64 o
 5 -11 4 83.92 196.39 60.69 o
 6 -11 4 102.56 118.65 64.10 o
 7 -11 4 13.01 147.29 81.15 o
 -9 -10 4 82.78 27.28 75.01 o
 -8 -10 4 122.06 141.15 66.14 o
 -7 -10 4 90.66 107.74 56.60 o
 -6 -10 4 121.30 139.79 34.09 o
 -5 -10 4 2007.61 1873.64 107.74 o
 -4 -10 4 471.84 500.44 44.32 o
 -3 -10 4 1226.05 1144.76 63.42 o
 -2 -10 4 1272.06 1257.27 68.19 o
 -1 -10 4 1725.42 1826.59 98.19 o
 0 -10 4 11289.54 12162.37 559.08 o
 1 -10 4 537.25 625.91 58.64 o
 2 -10 4 432.09 501.80 57.28 o
 3 -10 4 1015.02 1157.72 96.15 o
 4 -10 4 105.75 168.43 51.14 o
 5 -10 4 343.46 381.79 74.33 o
 6 -10 4 288.57 350.42 85.24 o
 7 -10 4 143.92 162.29 72.96 o
 -9 -9 4 16.72 29.32 63.42 o
 -8 -9 4 220.27 209.34 72.28 o
 -7 -9 4 157.41 85.24 60.69 o
 -6 -9 4 1284.45 1197.95 81.15 o
 -5 -9 4 25.59 28.92 15.56 o
 -4 -9 4 1813.27 1629.62 59.02 o
 -3 -9 4 4159.85 4108.68 198.43 o
 -2 -9 4 938.32 1056.12 61.37 o
 -1 -9 4 507.07 552.26 47.05 o
 0 -9 4 1471.52 1420.93 87.28 o
 1 -9 4 2179.10 2340.73 128.88 o
 2 -9 4 2172.29 2246.63 129.56 o
 3 -9 4 1790.19 2115.03 131.61 o
 4 -9 4 3925.56 3738.48 210.70 o
 5 -9 4 454.15 475.89 74.33 o
 6 -9 4 385.33 338.90 75.01 o
 7 -9 4 78.73 92.74 78.42 o
 -9 -8 4 28.48 41.60 68.19 o
 -8 -8 4 44.26 88.65 67.51 o
 -7 -8 4 5.89 10.23 33.41 o
 -6 -8 4 926.99 799.11 66.14 o
 -5 -8 4 715.98 785.09 39.51 o
 -4 -8 4 813.57 794.73 35.51 o
 -3 -8 4 1581.56 1378.21 50.29 o
 -2 -8 4 9050.45 9523.04 435.66 o
 -1 -8 4 1197.48 1145.44 68.87 o
 0 -8 4 5633.47 5911.39 289.80 o
 1 -8 4 505.75 541.35 52.51 o
 2 -8 4 2756.50 2890.95 160.93 o
 3 -8 4 1828.65 1609.81 116.60 o
 4 -8 4 2395.11 2446.36 154.11 o
 5 -8 4 46.12 19.09 53.87 o
 6 -8 4 60.69 92.06 63.42 o
 7 -8 4 22.32 51.14 68.87 o
 -9 -7 4 11.46 -8.86 55.92 o
 -8 -7 4 180.26 215.48 74.33 o
 -7 -7 4 236.76 216.84 45.69 o
 -6 -7 4 619.13 597.27 58.64 o
 -5 -7 4 123.88 134.33 32.05 o
 -4 -7 4 230.80 332.72 23.59 o
 -3 -7 4 7346.71 7549.11 242.71 o
 -2 -7 4 750.47 862.53 52.51 o
 -1 -7 4 659.78 691.37 47.05 o
 0 -7 4 1361.85 1432.52 81.83 o
 1 -7 4 4952.19 5625.07 260.48 o
 2 -7 4 1880.08 1953.42 115.92 o
 3 -7 4 1003.98 953.22 87.28 o
 4 -7 4 162.32 278.21 58.64 o
 5 -7 4 518.63 533.17 83.19 o
 6 -7 4 230.53 383.16 81.15 o
 7 -7 4 92.86 195.02 75.69 o
 -9 -6 4 105.36 -33.41 61.37 o
 -8 -6 4 96.83 132.29 59.32 o
 -7 -6 4 281.97 295.94 49.78 o
 -6 -6 4 2224.43 1749.53 109.78 o
 -5 -6 4 1904.68 1624.13 94.78 o
 -4 -6 4 754.85 771.53 35.63 o
 -3 -6 4 300.20 351.64 22.60 o
 -2 -6 4 503.41 704.75 56.94 o
 -1 -6 4 916.31 769.11 53.19 o
 0 -6 4 1545.35 1822.49 99.56 o
 1 -6 4 3324.78 3010.96 158.88 o
 2 -6 4 2041.12 2176.40 122.74 o
 3 -6 4 2778.79 2605.92 151.38 o
 4 -6 4 1524.71 1558.67 113.19 o
 5 -6 4 1.08 13.64 51.14 o
 6 -6 4 46.90 132.29 66.14 o
 7 -6 4 26.06 -25.23 65.46 o
 -9 -5 4 176.13 147.97 68.19 o
 -8 -5 4 742.23 789.56 100.24 o
 -7 -5 4 152.38 143.88 41.60 o
 -6 -5 4 664.37 828.43 69.55 o
 -5 -5 4 227.01 259.12 37.50 o
 -4 -5 4 572.21 504.18 30.76 o
 -3 -5 4 2072.90 1796.01 65.27 o
 -2 -5 4 1592.74 1408.17 51.53 o
 -1 -5 4 8107.60 8361.91 377.70 o
 0 -5 4 682.27 625.91 47.73 o
 1 -5 4 1237.40 1493.89 90.01 o
 2 -5 4 415.15 415.89 47.73 o
 3 -5 4 3144.02 3563.23 188.20 o
 4 -5 4 2007.95 2050.93 132.29 o
 5 -5 4 524.59 610.91 81.15 o
 6 -5 4 415.79 309.58 76.37 o
 7 -5 4 23.71 79.78 68.87 o
 -9 -4 4 39.51 79.78 64.10 o
 -8 -4 4 272.11 186.84 63.42 o
 -7 -4 4 92.61 83.19 38.19 o
 -6 -4 4 745.20 645.68 63.42 o
 -5 -4 4 3008.17 3106.36 163.65 o
 -4 -4 4 566.36 688.38 39.89 o
 -3 -4 4 1249.35 1020.02 42.09 o
 -2 -4 4 9313.69 10151.24 326.86 o
 -1 -4 4 228.90 244.12 29.32 o
 0 -4 4 1137.22 1124.99 67.51 o
 1 -4 4 10213.91 10305.78 492.26 o
 2 -4 4 259.89 304.81 42.96 o
 3 -4 4 1558.11 1732.48 109.78 o
 4 -4 4 540.80 591.81 70.92 o
 5 -4 4 137.49 263.21 61.37 o
 6 -4 4 219.49 282.99 68.19 o
 7 -4 4 97.34 171.16 72.28 o
 -9 -3 4 161.56 145.24 62.73 o
 -8 -3 4 197.29 159.56 64.10 o
 -7 -3 4 237.58 171.16 45.69 o
 -6 -3 4 1733.01 1461.16 93.42 o
 -5 -3 4 1087.69 846.84 66.14 o
 -4 -3 4 6217.98 5713.52 192.38 o
 -3 -3 4 4272.65 4455.85 147.29 o
 -2 -3 4 51.33 66.48 12.77 o
 -1 -3 4 9100.77 8174.90 270.69 o
 0 -3 4 6652.86 7956.19 365.43 o
 1 -3 4 2996.66 3035.51 158.88 o
 2 -3 4 4623.26 5088.49 252.30 o
 3 -3 4 1190.48 1330.24 90.01 o
 4 -3 4 532.64 856.39 83.19 o
 5 -3 4 173.68 137.74 50.46 o
 6 -3 4 239.00 292.53 72.96 o
 7 -3 4 77.21 171.16 74.33 o
 8 -3 4 53.13 -43.64 75.01 o
 -9 -2 4 416.51 410.43 81.15 o
 -8 -2 4 174.48 195.70 66.14 o
 -7 -2 4 515.14 316.40 53.87 o
 -6 -2 4 146.04 113.19 39.55 o
 -5 -2 4 453.40 475.21 52.51 o
 -4 -2 4 5005.29 4573.36 156.70 o
 -3 -2 4 2613.02 2225.69 81.45 o
 -2 -2 4 7356.33 7602.69 249.72 o
 -1 -2 4 413.04 447.45 31.03 o
 0 -2 4 12120.91 12770.55 597.95 o
 1 -2 4 140.50 301.40 35.46 o
 2 -2 4 458.51 619.77 57.28 o
 3 -2 4 214.69 357.24 49.10 o
 4 -2 4 1236.62 1255.91 96.83 o
 5 -2 4 424.55 443.16 70.23 o
 6 -2 4 286.70 321.85 71.60 o
 7 -2 4 165.64 139.79 71.60 o
 8 -2 4 50.81 21.32 53.01 o
 -9 -1 4 21.73 -2.73 55.23 o
 -8 -1 4 149.27 159.56 60.01 o
 -7 -1 4 342.43 289.12 53.19 o
 -6 -1 4 653.45 578.18 64.10 o
 -5 -1 4 1779.52 1667.09 99.56 o
 -4 -1 4 891.42 815.03 54.55 o
 -3 -1 4 158.42 292.53 34.78 o
 -2 -1 4 682.79 672.73 32.52 o
 -1 -1 4 2344.59 2287.12 64.46 o
 0 -1 4 3392.29 3512.20 208.66 o
 1 -1 4 3038.84 3461.63 171.16 o
 2 -1 4 4892.70 4765.95 233.21 o
 3 -1 4 1238.28 1210.22 81.83 o
 4 -1 4 177.96 244.80 49.78 o
 5 -1 4 227.04 286.39 56.60 o
 6 -1 4 9.93 103.65 57.28 o
 7 -1 4 27.37 108.72 54.21 o
 8 -1 4 15.38 8.41 52.72 o
 -9 0 4 470.72 507.94 85.92 o
 -8 0 4 226.63 190.25 63.42 o
 -7 0 4 358.60 276.85 51.82 o
 -6 0 4 19.95 -10.23 33.41 o
 -5 0 4 322.56 445.89 54.55 o
 -4 0 4 2736.97 3309.10 118.35 o
 -3 0 4 170.26 159.21 23.87 o
 -2 0 4 1054.97 1139.41 47.25 o
 -1 0 4 27.35 74.06 9.90 o
 0 0 4 10227.29 10963.70 562.83 o
 1 0 4 4.61 54.09 14.65 o
 2 0 4 2156.64 1855.91 104.33 o
 3 0 4 5.01 454.75 51.14 o
 4 0 4 2253.47 2447.72 142.52 o
 5 0 4 412.58 344.29 64.78 o
 6 0 4 47.24 79.16 40.26 o
 7 0 4 286.73 248.00 69.89 o
 8 0 4 66.55 55.18 80.46 o
 -9 1 4 21.73 -11.59 53.87 o
 -8 1 4 149.27 138.42 59.32 o
 -7 1 4 342.43 235.25 51.82 o
 -6 1 4 653.45 567.95 65.46 o
 -5 1 4 1779.52 1594.81 101.60 o
 -4 1 4 891.42 1017.94 86.23 o
 -3 1 4 158.42 338.90 36.14 o
 -2 1 4 682.79 675.14 30.09 o
 -1 1 4 2344.59 2327.76 65.56 o
 0 1 4 3392.28 3356.15 95.23 o
 1 1 4 3038.85 3478.74 119.58 o
 2 1 4 4892.70 4796.15 164.65 o
 3 1 4 1238.28 1081.92 56.10 o
 4 1 4 177.96 344.97 51.82 o
 5 1 4 227.04 235.61 40.95 o
 6 1 4 9.93 14.83 37.85 o
 7 1 4 27.37 48.05 45.95 o
 8 1 4 15.38 -29.32 71.60 o
 -9 2 4 416.51 506.74 62.48 o
 -8 2 4 174.48 124.79 55.92 o
 -7 2 4 515.14 506.58 66.83 o
 -6 2 4 146.04 157.52 45.00 o
 -5 2 4 453.40 479.98 55.92 o
 -4 2 4 5005.29 4614.01 159.83 o
 -3 2 4 2613.02 2276.69 84.14 o
 -2 2 4 7356.33 7711.27 203.71 o
 -1 2 4 413.05 476.06 19.94 o
 0 2 4 12120.90 13346.17 345.46 o
 1 2 4 140.51 289.07 23.63 o
 2 2 4 458.51 676.73 46.37 o
 3 2 4 214.69 337.38 33.01 o
 4 2 4 1236.62 1297.37 67.25 o
 5 2 4 424.55 505.68 147.60 o
 6 2 4 286.70 329.23 49.64 o
 7 2 4 165.64 292.73 70.88 o
 8 2 4 50.81 -45.00 77.05 o
 -9 3 4 161.56 213.43 74.33 o
 -8 3 4 197.29 193.00 77.05 o
 -7 3 4 237.58 158.20 50.46 o
 -6 3 4 1733.00 1295.46 98.19 o
 -5 3 4 1087.68 952.54 74.33 o
 -4 3 4 6217.98 5806.27 196.97 o
 -3 3 4 4272.65 4304.14 121.89 o
 -2 3 4 51.33 51.30 10.59 o
 -1 3 4 9100.77 8459.15 220.37 o
 0 3 4 6652.86 7902.85 210.56 o
 1 3 4 2996.66 3269.05 111.86 o
 2 3 4 4623.27 5247.66 177.17 o
 3 3 4 1190.48 1224.39 60.27 o
 4 3 4 532.64 747.84 95.12 o
 5 3 4 173.68 223.06 39.21 o
 6 3 4 239.00 311.02 48.37 o
 7 3 4 77.21 108.34 47.76 o
 8 3 4 53.13 57.28 79.10 o
 -9 4 4 39.51 75.01 66.14 o
 -8 4 4 272.11 304.01 61.68 o
 -7 4 4 92.61 95.21 32.90 o
 -6 4 4 745.20 560.45 66.14 o
 -5 4 4 3008.17 3293.88 173.20 o
 -4 4 4 566.36 624.64 49.44 o
 -3 4 4 1249.34 977.74 31.30 o
 -2 4 4 9313.70 10139.14 230.36 o
 -1 4 4 228.90 252.77 29.52 o
 0 4 4 1137.22 1125.41 38.59 o
 1 4 4 10213.91 10924.63 346.63 o
 2 4 4 259.89 276.35 37.50 o
 3 4 4 1558.11 1813.42 76.02 o
 4 4 4 540.80 523.85 44.53 o
 5 4 4 137.49 154.63 35.72 o
 6 4 4 219.49 375.66 49.94 o
 7 4 4 97.34 8.86 64.10 o
 -9 5 4 176.13 92.06 68.87 o
 -8 5 4 742.23 759.31 63.69 o
 -7 5 4 152.38 172.65 38.81 o
 -6 5 4 664.37 770.26 55.44 o
 -5 5 4 227.01 188.80 28.88 o
 -4 5 4 572.21 570.18 51.55 o
 -3 5 4 2072.90 1782.64 48.81 o
 -2 5 4 1592.74 1321.13 37.60 o
 -1 5 4 8107.60 8175.93 187.31 o
 0 5 4 682.27 652.65 26.67 o
 1 5 4 1237.40 1619.49 62.89 o
 2 5 4 415.14 398.09 82.82 o
 3 5 4 3144.03 3567.92 130.23 o
 4 5 4 2007.95 2194.76 91.92 o
 5 5 4 524.59 563.77 51.76 o
 6 5 4 415.79 419.75 65.09 o
 7 5 4 23.71 34.09 68.19 o
 -9 6 4 105.36 108.42 65.46 o
 -8 6 4 96.83 58.64 57.28 o
 -7 6 4 281.97 302.92 44.60 o
 -6 6 4 2224.43 1919.16 86.27 o
 -5 6 4 1904.68 1621.51 72.51 o
 -4 6 4 754.85 687.86 33.53 o
 -3 6 4 300.20 379.39 19.63 o
 -2 6 4 503.41 744.93 23.98 o
 -1 6 4 916.31 821.94 25.11 o
 0 6 4 1545.36 1843.99 56.87 o
 1 6 4 3324.77 3208.11 111.30 o
 2 6 4 2041.13 2102.07 81.33 o
 3 6 4 2778.79 2747.44 103.46 o
 4 6 4 1524.71 1509.93 73.20 o
 5 6 4 1.08 4.40 28.01 o
 6 6 4 46.90 146.64 40.57 o
 7 6 4 26.06 5.46 67.51 o
 -9 7 4 11.46 -50.46 50.46 o
 -8 7 4 180.26 188.88 64.10 o
 -7 7 4 236.76 230.79 41.69 o
 -6 7 4 619.13 590.88 60.01 o
 -5 7 4 123.88 148.00 26.99 o
 -4 7 4 230.79 294.65 21.63 o
 -3 7 4 7346.73 7459.90 175.16 o
 -2 7 4 750.46 812.76 26.15 o
 -1 7 4 659.78 619.76 21.53 o
 0 7 4 1361.84 1446.94 47.55 o
 1 7 4 4952.18 5294.90 148.37 o
 2 7 4 1880.08 2040.78 79.28 o
 3 7 4 1003.98 1005.76 51.93 o
 4 7 4 162.32 302.22 35.15 o
 5 7 4 518.63 639.78 52.42 o
 6 7 4 230.53 317.08 77.05 o
 7 7 4 92.86 125.47 75.01 o
 -9 8 4 28.48 15.00 62.05 o
 -8 8 4 44.26 67.51 59.32 o
 -7 8 4 5.89 52.02 33.87 o
 -6 8 4 926.99 846.91 59.90 o
 -5 8 4 715.98 802.04 50.58 o
 -4 8 4 813.57 780.78 33.86 o
 -3 8 4 1581.55 1360.06 41.23 o
 -2 8 4 9050.46 9562.00 219.17 o
 -1 8 4 1197.48 1177.35 34.06 o
 0 8 4 5633.47 6236.17 144.67 o
 1 8 4 505.75 574.56 56.37 o
 2 8 4 2756.51 3081.27 110.37 o
 3 8 4 1828.65 1910.34 77.47 o
 4 8 4 2395.12 2499.13 101.36 o
 5 8 4 46.12 132.02 33.10 o
 6 8 4 60.69 108.42 64.10 o
 7 8 4 22.32 -1.36 62.05 o
 -9 9 4 16.72 87.96 65.46 o
 -8 9 4 220.27 210.02 66.83 o
 -7 9 4 157.41 147.08 44.66 o
 -6 9 4 1284.45 1266.17 68.23 o
 -5 9 4 25.59 81.47 25.82 o
 -4 9 4 1813.27 1561.97 49.21 o
 -3 9 4 4159.85 4190.20 102.88 o
 -2 9 4 938.32 1025.10 31.90 o
 -1 9 4 507.07 482.13 20.34 o
 0 9 4 1471.52 1536.84 42.98 o
 1 9 4 2179.09 2356.67 72.54 o
 2 9 4 2172.29 2266.61 86.70 o
 3 9 4 1790.20 2068.35 84.24 o
 4 9 4 3925.56 3773.13 191.24 o
 5 9 4 454.15 481.55 46.35 o
 6 9 4 385.33 491.58 85.24 o
 7 9 4 78.73 57.28 64.78 o
 -9 10 4 82.78 159.56 67.51 o
 -8 10 4 122.06 97.51 57.28 o
 -7 10 4 90.66 155.15 51.82 o
 -6 10 4 121.30 173.15 34.84 o
 -5 10 4 2007.61 2073.00 87.50 o
 -4 10 4 471.84 481.38 27.43 o
 -3 10 4 1226.05 1057.07 42.70 o
 -2 10 4 1272.05 1141.37 35.53 o
 -1 10 4 1725.41 1803.02 49.20 o
 0 10 4 11289.58 12241.84 278.82 o
 1 10 4 537.25 575.25 30.01 o
 2 10 4 432.09 531.24 63.42 o
 3 10 4 1015.02 1252.81 59.30 o
 4 10 4 105.75 235.68 30.90 o
 5 10 4 343.47 338.22 70.23 o
 6 10 4 288.56 372.25 81.15 o
 7 10 4 143.92 53.19 70.92 o
 -9 11 4 3.26 -19.77 60.01 o
 -8 11 4 110.82 163.65 60.69 o
 -7 11 4 13.05 84.55 50.46 o
 -6 11 4 753.77 647.54 124.10 o
 -5 11 4 785.86 787.64 85.03 o
 -4 11 4 1696.55 1990.47 59.67 o
 -3 11 4 487.66 612.81 27.99 o
 -2 11 4 326.08 361.24 21.14 o
 -1 11 4 569.01 517.74 30.39 o
 0 11 4 379.68 292.68 18.31 o
 1 11 4 2407.28 2550.65 67.28 o
 2 11 4 1516.90 1478.92 64.02 o
 3 11 4 1375.26 1484.76 64.88 o
 4 11 4 500.05 459.15 38.78 o
 5 11 4 83.92 2.05 53.19 o
 6 11 4 102.56 49.78 62.05 o
 7 11 4 13.01 98.87 78.42 o
 -9 12 4 156.33 210.70 73.64 o
 -8 12 4 169.51 148.65 62.05 o
 -7 12 4 411.67 430.89 69.55 o
 -6 12 4 811.31 674.24 54.69 o
 -5 12 4 193.26 174.91 23.89 o
 -4 12 4 893.67 914.58 37.89 o
 -3 12 4 708.93 578.76 28.68 o
 -2 12 4 1397.14 1288.03 39.25 o
 -1 12 4 2894.66 3128.66 79.20 o
 0 12 4 377.47 343.78 20.53 o
 1 12 4 96.13 152.47 16.19 o
 2 12 4 2112.68 2226.75 86.56 o
 3 12 4 679.69 704.92 42.62 o
 4 12 4 999.85 1258.64 109.78 o
 5 12 4 426.69 453.39 79.10 o
 6 12 4 356.64 418.61 80.46 o
 7 12 4 144.93 83.87 70.92 o
 -8 13 4 6.28 125.47 58.64 o
 -7 13 4 100.38 148.65 54.55 o
 -6 13 4 469.91 462.52 92.40 o
 -5 13 4 1311.25 1206.66 48.25 o
 -4 13 4 1064.29 1224.86 44.41 o
 -3 13 4 414.22 430.34 26.91 o
 -2 13 4 323.92 517.71 25.17 o
 -1 13 4 271.55 305.42 19.42 o
 0 13 4 1515.78 1492.21 44.48 o
 1 13 4 301.50 283.35 19.58 o
 2 13 4 1360.89 1416.99 126.83 o
 3 13 4 534.60 546.26 38.30 o
 4 13 4 470.25 591.13 81.15 o
 5 13 4 94.28 105.69 58.64 o
 6 13 4 20.06 79.10 66.14 o
 7 13 4 0.67 171.84 79.10 o
 -8 14 4 117.26 167.75 62.73 o
 -7 14 4 437.94 372.93 69.55 o
 -6 14 4 102.91 132.78 37.85 o
 -5 14 4 130.22 135.69 23.32 o
 -4 14 4 981.93 905.42 40.52 o
 -3 14 4 103.21 144.70 18.50 o
 -2 14 4 1673.47 1765.06 51.49 o
 -1 14 4 373.39 362.77 33.25 o
 0 14 4 1272.02 1412.74 43.67 o
 1 14 4 214.66 211.90 18.41 o
 2 14 4 1218.64 1259.96 60.01 o
 3 14 4 243.53 377.70 67.51 o
 4 14 4 49.71 102.97 53.87 o
 5 14 4 181.81 106.38 65.46 o
 6 14 4 188.09 137.74 69.55 o
 7 14 4 203.59 237.98 85.92 o
 -8 15 4 178.43 216.16 66.83 o
 -7 15 4 419.20 402.93 70.92 o
 -6 15 4 400.64 432.76 49.21 o
 -5 15 4 526.62 441.77 33.08 o
 -4 15 4 1122.89 1263.04 46.16 o
 -3 15 4 2377.16 2453.55 95.25 o
 -2 15 4 408.19 535.22 26.93 o
 -1 15 4 330.65 359.77 31.38 o
 0 15 4 1076.42 1044.75 36.63 o
 1 15 4 208.99 253.65 22.83 o
 2 15 4 414.15 536.03 31.71 o
 3 15 4 20.57 19.77 42.96 o
 4 15 4 128.23 43.64 51.82 o
 5 15 4 1055.84 1178.86 121.38 o
 6 15 4 56.59 9.55 60.01 o
 7 15 4 12.29 42.28 76.37 o
 -8 16 4 26.54 16.37 55.92 o
 -7 16 4 65.92 78.89 40.57 o
 -6 16 4 295.35 228.98 42.51 o
 -5 16 4 1671.31 1546.78 57.94 o
 -4 16 4 283.43 376.53 28.71 o
 -3 16 4 861.53 998.09 39.56 o
 -2 16 4 480.35 555.84 28.71 o
 -1 16 4 350.39 377.53 32.91 o
 0 16 4 761.75 843.36 35.21 o
 1 16 4 1288.47 1263.67 42.77 o
 2 16 4 17.05 79.79 17.97 o
 3 16 4 1524.23 1718.16 120.69 o
 4 16 4 85.46 42.28 58.64 o
 5 16 4 142.29 188.88 69.55 o
 6 16 4 62.00 103.65 69.55 o
 -8 17 4 328.86 332.31 59.75 o
 -7 17 4 339.18 235.42 52.26 o
 -6 17 4 275.99 330.33 64.83 o
 -5 17 4 112.35 99.70 24.52 o
 -4 17 4 439.01 425.61 30.66 o
 -3 17 4 1086.39 1037.32 55.69 o
 -2 17 4 302.71 345.73 24.29 o
 -1 17 4 831.15 813.86 36.42 o
 0 17 4 376.92 397.25 32.17 o
 1 17 4 1206.66 1351.08 44.79 o
 2 17 4 135.40 268.93 42.69 o
 3 17 4 635.59 642.96 81.83 o
 4 17 4 43.21 162.29 63.42 o
 5 17 4 173.09 379.75 79.78 o
 6 17 4 218.03 163.65 75.01 o
 -8 18 4 113.07 30.46 47.81 o
 -7 18 4 250.04 244.51 52.41 o
 -6 18 4 736.71 595.61 50.01 o
 -5 18 4 840.57 964.17 49.05 o
 -4 18 4 298.51 250.33 27.74 o
 -3 18 4 787.15 831.07 38.87 o
 -2 18 4 91.39 187.36 22.44 o
 -1 18 4 62.19 135.68 18.91 o
 0 18 4 432.21 496.23 28.58 o
 1 18 4 412.24 379.64 25.07 o
 2 18 4 211.43 264.66 31.91 o
 3 18 4 384.20 513.40 77.05 o
 4 18 4 179.29 195.02 60.01 o
 5 18 4 20.27 25.23 66.14 o
 6 18 4 145.22 102.28 74.33 o
 -8 19 4 65.05 123.76 56.03 o
 -7 19 4 102.54 97.34 46.52 o
 -6 19 4 15.40 22.97 31.63 o
 -5 19 4 132.48 117.11 27.30 o
 -4 19 4 969.00 914.44 45.63 o
 -3 19 4 245.71 273.24 26.46 o
 -2 19 4 308.46 336.13 48.11 o
 -1 19 4 1819.73 1877.93 58.32 o
 0 19 4 1014.06 1048.47 39.99 o
 1 19 4 248.83 300.24 32.01 o
 2 19 4 94.56 139.93 28.10 o
 3 19 4 209.29 180.70 58.64 o
 4 19 4 24.49 51.14 54.55 o
 5 19 4 60.95 64.78 60.69 o
 6 19 4 291.52 327.31 88.65 o
 -7 20 4 94.81 101.79 68.87 o
 -6 20 4 185.24 240.42 40.79 o
 -5 20 4 321.80 294.21 38.05 o
 -4 20 4 597.13 537.58 37.23 o
 -3 20 4 297.03 299.10 27.80 o
 -2 20 4 1249.13 1276.15 46.52 o
 -1 20 4 1413.48 1408.22 54.80 o
 0 20 4 294.95 291.01 25.07 o
 1 20 4 424.59 464.13 37.31 o
 2 20 4 356.02 409.13 37.39 o
 3 20 4 101.62 183.43 57.28 o
 4 20 4 571.79 596.59 88.65 o
 5 20 4 118.08 108.42 66.83 o
 6 20 4 102.28 79.10 74.33 o
 -7 21 4 48.68 26.20 66.48 o
 -6 21 4 78.33 74.31 36.38 o
 -5 21 4 243.08 291.09 38.00 o
 -4 21 4 391.99 376.25 33.88 o
 -3 21 4 186.01 203.03 26.52 o
 -2 21 4 920.45 926.77 41.96 o
 -1 21 4 533.04 686.45 36.14 o
 0 21 4 78.73 119.88 20.78 o
 1 21 4 343.08 387.88 36.50 o
 2 21 4 199.49 238.27 33.19 o
 3 21 4 322.36 128.20 58.64 o
 4 21 4 20.01 17.73 57.28 o
 5 21 4 30.87 57.96 64.10 o
 6 21 4 11.98 77.74 72.28 o
 -7 22 4 115.17 95.30 53.08 o
 -6 22 4 2.63 -31.05 51.02 o
 -5 22 4 163.24 160.35 53.55 o
 -4 22 4 8.32 44.30 29.01 o
 -3 22 4 99.90 125.64 27.07 o
 -2 22 4 388.90 370.80 30.42 o
 -1 22 4 28.80 34.80 19.79 o
 0 22 4 189.02 232.74 29.92 o
 1 22 4 256.96 337.30 35.54 o
 2 22 4 46.44 82.05 29.13 o
 3 22 4 44.42 76.49 39.99 o
 4 22 4 272.63 239.34 66.83 o
 5 22 4 38.03 109.78 68.19 o
 -7 23 4 103.20 96.83 84.55 o
 -6 23 4 39.07 13.72 40.36 o
 -5 23 4 46.35 89.33 34.60 o
 -4 23 4 150.47 197.90 35.97 o
 -3 23 4 57.05 125.84 26.63 o
 -2 23 4 11.57 64.50 22.89 o
 -1 23 4 8.11 16.70 19.51 o
 0 23 4 232.77 226.07 32.37 o
 1 23 4 289.68 391.89 38.74 o
 2 23 4 1207.46 1103.19 62.03 o
 3 23 4 11.63 -45.28 103.99 o
 4 23 4 48.39 -27.96 56.60 o
 5 23 4 30.25 17.73 62.05 o
 -6 24 4 18.40 -6.44 37.16 o
 -5 24 4 56.69 23.78 35.82 o
 -4 24 4 47.62 1.30 35.21 o
 -3 24 4 421.51 454.97 48.17 o
 -2 24 4 432.60 408.66 33.00 o
 -1 24 4 662.06 631.68 37.36 o
 0 24 4 534.30 783.53 49.99 o
 1 24 4 5.69 48.94 27.62 o
 2 24 4 58.59 16.12 28.47 o
 3 24 4 98.82 102.43 51.48 o
 4 24 4 78.75 136.38 68.19 o
 5 24 4 45.60 81.83 66.83 o
 -6 25 4 222.81 118.87 55.70 o
 -5 25 4 22.09 15.00 35.99 o
 -4 25 4 24.07 40.04 58.23 o
 -3 25 4 5.66 38.49 30.04 o
 -2 25 4 261.38 323.39 38.15 o
 -1 25 4 52.83 26.42 27.41 o
 0 25 4 261.33 232.80 34.07 o
 1 25 4 27.80 -4.58 31.39 o
 2 25 4 128.50 198.65 36.73 o
 3 25 4 78.86 65.59 43.39 o
 4 25 4 108.07 121.38 71.60 o
 -6 26 4 94.07 85.25 57.18 o
 -5 26 4 38.96 61.22 38.42 o
 -4 26 4 214.35 235.51 40.62 o
 -3 26 4 25.83 26.63 32.72 o
 -2 26 4 177.02 272.34 38.20 o
 -1 26 4 38.20 21.39 28.23 o
 0 26 4 326.65 432.78 58.52 o
 1 26 4 271.41 398.35 42.67 o
 2 26 4 53.26 43.36 62.73 o
 3 26 4 13.19 50.72 68.19 o
 4 26 4 15.75 14.32 65.46 o
 -5 27 4 7.55 52.43 39.89 o
 -4 27 4 218.05 183.44 40.72 o
 -3 27 4 85.12 83.57 36.36 o
 -2 27 4 114.63 170.24 36.37 o
 -1 27 4 213.68 233.10 37.04 o
 0 27 4 45.49 85.80 32.00 o
 1 27 4 2.91 33.05 31.62 o
 2 27 4 62.24 123.67 43.47 o
 3 27 4 290.90 348.42 59.51 o
 4 27 4 73.77 70.23 70.23 o
 -5 28 4 38.52 60.21 54.48 o
 -4 28 4 7.55 -34.87 34.87 o
 -3 28 4 3.26 -24.19 46.69 o
 -2 28 4 46.67 39.32 50.04 o
 -1 28 4 32.17 60.45 55.51 o
 0 28 4 132.72 133.50 35.54 o
 1 28 4 314.80 354.13 54.60 o
 2 28 4 84.42 132.62 45.47 o
 3 28 4 117.40 139.93 83.87 o
 -4 29 4 35.13 11.68 38.30 o
 -3 29 4 101.02 146.20 40.97 o
 -2 29 4 49.06 54.03 36.29 o
 -1 29 4 48.81 47.78 33.39 o
 0 29 4 96.61 165.56 37.71 o
 1 29 4 38.45 89.08 43.32 o
 2 29 4 23.11 6.18 42.65 o
 3 29 4 42.37 55.63 47.47 o
 -4 30 4 22.52 -22.93 54.08 o
 -3 30 4 7.18 -2.49 37.23 o
 -2 30 4 21.87 49.02 37.48 o
 -1 30 4 4.52 -8.93 32.96 o
 0 30 4 31.48 71.02 48.72 o
 1 30 4 87.22 89.92 50.46 o
 2 30 4 34.01 12.43 43.15 o
 -3 31 4 218.52 307.79 49.86 o
 -2 31 4 32.27 33.24 37.73 o
 -1 31 4 43.46 56.61 38.23 o
 0 31 4 33.33 89.56 44.10 o
 1 31 4 22.27 13.98 43.68 o
 2 31 4 100.98 120.01 51.34 o
 -2 32 4 55.44 -35.28 35.28 o
 -1 32 4 31.30 29.32 37.38 o
 0 32 4 25.10 1.93 43.40 o
 1 32 4 18.74 75.05 49.15 o
 -4 -30 5 19.67 30.69 63.42 o
 2 -30 5 61.55 -8.86 70.23 o
 -4 -29 5 39.68 66.14 66.14 o
 2 -29 5 0.57 73.64 67.51 o
 -5 -28 5 103.93 154.11 72.28 o
 -4 -28 5 28.11 96.83 63.42 o
 -3 -28 5 40.57 88.65 59.32 o
 1 -28 5 75.26 130.24 64.78 o
 2 -28 5 94.34 -9.55 62.73 o
 3 -28 5 2.96 195.02 83.87 o
 -5 -27 5 30.12 -36.82 66.14 o
 -4 -27 5 6.32 -43.64 55.23 o
 -3 -27 5 70.15 116.60 56.60 o
 1 -27 5 92.19 57.96 57.28 o
 2 -27 5 6.12 77.05 66.83 o
 3 -27 5 57.27 127.51 74.33 o
 -6 -26 5 19.28 63.42 70.92 o
 -5 -26 5 46.03 103.65 70.92 o
 -4 -26 5 57.51 60.01 57.28 o
 -3 -26 5 10.79 2.73 49.10 o
 0 -26 5 30.11 33.41 48.41 o
 1 -26 5 85.86 52.51 55.23 o
 2 -26 5 58.24 74.33 62.73 o
 3 -26 5 53.38 71.60 67.51 o
 4 -26 5 9.79 42.96 78.42 o
 -6 -25 5 89.31 262.53 89.33 o
 -5 -25 5 5.64 -13.64 62.05 o
 -4 -25 5 89.84 140.47 62.73 o
 0 -25 5 42.56 25.23 49.10 o
 1 -25 5 164.52 137.06 56.60 o
 2 -25 5 111.93 76.37 59.32 o
 3 -25 5 183.19 30.69 66.83 o
 4 -25 5 69.48 -9.55 71.60 o
 -6 -24 5 46.53 90.69 66.83 o
 -5 -24 5 7.32 -8.86 55.23 o
 -1 -24 5 292.61 282.30 53.19 o
 0 -24 5 10.95 -40.91 40.91 o
 1 -24 5 650.37 622.50 82.51 o
 2 -24 5 24.15 32.05 55.23 o
 3 -24 5 27.80 151.38 70.92 o
 4 -24 5 3.45 42.96 71.60 o
 -7 -23 5 4.50 25.91 73.64 o
 -6 -23 5 312.61 292.53 90.01 o
 -5 -23 5 1.47 0.00 57.28 o
 -1 -23 5 11.25 45.00 38.19 o
 0 -23 5 214.02 241.39 55.92 o
 1 -23 5 544.10 487.48 75.01 o
 2 -23 5 31.17 85.92 59.32 o
 3 -23 5 312.87 336.17 85.24 o
 4 -23 5 79.89 185.47 80.46 o
 5 -23 5 41.04 46.37 79.78 o
 -7 -22 5 27.22 47.05 75.01 o
 -6 -22 5 48.05 14.32 66.14 o
 -1 -22 5 151.30 233.89 45.69 o
 0 -22 5 344.69 396.11 62.73 o
 1 -22 5 47.11 12.96 44.32 o
 2 -22 5 42.70 43.64 54.55 o
 3 -22 5 193.86 181.38 74.33 o
 4 -22 5 194.57 309.58 90.01 o
 5 -22 5 94.89 41.60 83.19 o
 -7 -21 5 15.54 46.37 69.55 o
 -6 -21 5 23.10 -28.64 53.87 o
 -2 -21 5 850.64 861.16 76.37 o
 -1 -21 5 4.80 42.28 35.46 o
 0 -21 5 1782.55 1840.22 119.33 o
 1 -21 5 130.44 124.10 51.82 o
 2 -21 5 188.86 213.43 57.28 o
 3 -21 5 140.59 195.70 70.23 o
 4 -21 5 3.56 17.73 60.01 o
 5 -21 5 17.12 120.69 75.01 o
 -7 -20 5 48.61 69.55 75.01 o
 -6 -20 5 108.23 162.29 71.60 o
 -2 -20 5 20.48 24.55 31.37 o
 -1 -20 5 95.12 130.92 39.55 o
 0 -20 5 145.35 122.06 43.64 o
 1 -20 5 318.19 338.22 59.32 o
 2 -20 5 702.27 739.79 92.06 o
 3 -20 5 332.54 362.70 77.05 o
 4 -20 5 464.80 525.67 95.46 o
 5 -20 5 132.79 144.56 84.55 o
 -8 -19 5 17.25 17.05 75.01 o
 -7 -19 5 78.47 188.88 81.15 o
 -2 -19 5 945.27 797.06 68.19 o
 -1 -19 5 189.13 107.06 36.14 o
 0 -19 5 1064.54 1278.41 92.06 o
 1 -19 5 66.08 83.87 47.05 o
 2 -19 5 111.21 76.37 47.05 o
 3 -19 5 28.52 33.41 55.23 o
 4 -19 5 315.47 280.94 74.33 o
 5 -19 5 31.53 36.14 65.46 o
 -8 -18 5 40.16 -27.96 76.37 o
 -7 -18 5 70.85 74.33 72.28 o
 -3 -18 5 409.19 411.11 44.32 o
 -2 -18 5 116.51 92.74 33.41 o
 -1 -18 5 327.11 497.03 53.87 o
 0 -18 5 1091.66 1062.25 82.51 o
 1 -18 5 867.96 751.38 82.51 o
 2 -18 5 854.12 947.08 94.10 o
 3 -18 5 47.30 128.20 63.42 o
 4 -18 5 220.09 290.49 77.74 o
 5 -18 5 43.57 74.33 74.33 o
 6 -18 5 23.10 147.97 83.87 o
 -8 -17 5 2.49 10.91 70.23 o
 -7 -17 5 67.28 137.74 72.96 o
 -3 -17 5 247.09 305.49 38.87 o
 -2 -17 5 396.15 362.70 47.73 o
 -1 -17 5 1018.34 877.53 69.55 o
 0 -17 5 1389.18 1327.51 93.42 o
 1 -17 5 102.74 145.93 47.73 o
 2 -17 5 61.45 60.01 48.41 o
 3 -17 5 177.28 211.39 63.42 o
 4 -17 5 516.27 593.86 96.15 o
 5 -17 5 150.44 70.23 78.42 o
 6 -17 5 223.34 207.30 84.55 o
 -8 -16 5 2.05 83.87 78.42 o
 -7 -16 5 94.96 180.70 65.46 o
 -3 -16 5 848.57 808.66 58.64 o
 -2 -16 5 110.91 162.29 33.41 o
 -1 -16 5 626.05 684.55 64.10 o
 0 -16 5 596.17 571.36 64.10 o
 1 -16 5 975.96 793.65 78.42 o
 2 -16 5 741.50 931.40 92.06 o
 3 -16 5 54.97 15.00 47.05 o
 4 -16 5 43.14 40.23 60.01 o
 5 -16 5 108.94 77.74 75.01 o
 6 -16 5 18.86 -21.14 64.10 o
 -8 -15 5 7.00 -43.64 66.14 o
 -7 -15 5 57.51 -1.36 56.60 o
 -4 -15 5 437.59 463.62 45.00 o
 -3 -15 5 70.64 114.56 27.96 o
 -2 -15 5 138.10 205.25 35.46 o
 -1 -15 5 1653.50 1631.63 98.87 o
 0 -15 5 797.95 743.88 68.87 o
 1 -15 5 514.40 410.43 56.60 o
 2 -15 5 490.07 468.39 70.23 o
 3 -15 5 1346.84 1050.66 105.69 o
 4 -15 5 688.62 727.51 98.87 o
 5 -15 5 150.41 100.92 71.60 o
 6 -15 5 20.80 -47.05 60.01 o
 -8 -14 5 287.60 422.02 95.46 o
 -4 -14 5 226.65 240.03 34.09 o
 -3 -14 5 380.15 430.21 43.64 o
 -2 -14 5 800.15 697.51 57.96 o
 -1 -14 5 915.60 724.78 60.69 o
 0 -14 5 1136.97 953.22 73.64 o
 1 -14 5 916.96 925.94 82.51 o
 2 -14 5 783.91 692.73 75.69 o
 3 -14 5 64.06 110.47 54.55 o
 4 -14 5 477.46 497.71 83.87 o
 5 -14 5 369.72 341.56 83.19 o
 6 -14 5 35.03 60.69 69.55 o
 -8 -13 5 88.83 63.42 74.33 o
 -5 -13 5 1087.29 1064.30 72.28 o
 -4 -13 5 352.50 393.38 41.60 o
 -3 -13 5 340.70 475.89 45.00 o
 -2 -13 5 1922.13 1694.37 102.97 o
 -1 -13 5 165.56 282.30 38.87 o
 0 -13 5 4251.74 4236.87 210.70 o
 1 -13 5 1476.30 1411.38 96.15 o
 2 -13 5 192.70 241.39 52.51 o
 3 -13 5 2335.11 2237.77 142.52 o
 4 -13 5 277.15 186.16 66.14 o
 5 -13 5 179.40 171.16 72.96 o
 6 -13 5 11.41 38.19 72.96 o
 -9 -12 5 12.20 51.82 77.05 o
 -8 -12 5 357.58 435.66 91.37 o
 -5 -12 5 141.43 115.92 31.37 o
 -4 -12 5 297.83 363.38 40.91 o
 -3 -12 5 278.58 375.65 40.23 o
 -2 -12 5 4411.53 3613.69 191.61 o
 -1 -12 5 881.24 905.49 64.10 o
 0 -12 5 2232.94 2111.62 120.69 o
 1 -12 5 507.64 462.94 55.92 o
 2 -12 5 136.49 139.11 43.64 o
 3 -12 5 2487.59 2219.36 141.83 o
 4 -12 5 305.33 226.39 62.05 o
 5 -12 5 540.69 456.80 82.51 o
 6 -12 5 54.35 -3.41 73.64 o
 7 -12 5 129.66 76.37 87.28 o
 -9 -11 5 28.93 9.55 65.46 o
 -8 -11 5 357.04 265.26 77.74 o
 -6 -11 5 1211.07 1165.22 81.83 o
 -5 -11 5 79.50 79.78 28.64 o
 -4 -11 5 787.55 809.34 58.64 o
 -3 -11 5 750.66 790.93 57.28 o
 -2 -11 5 446.22 505.21 47.73 o
 -1 -11 5 1116.73 1663.68 91.37 o
 0 -11 5 2792.11 2928.46 150.70 o
 1 -11 5 877.96 1034.98 76.37 o
 2 -11 5 1178.11 1067.71 82.51 o
 3 -11 5 509.78 469.76 70.92 o
 4 -11 5 107.82 258.44 66.14 o
 5 -11 5 38.63 93.42 68.19 o
 6 -11 5 15.88 30.69 62.05 o
 7 -11 5 33.60 179.34 85.24 o
 -9 -10 5 59.07 60.69 69.55 o
 -8 -10 5 545.77 519.53 93.42 o
 -6 -10 5 235.36 252.98 44.32 o
 -5 -10 5 115.65 216.16 35.46 o
 -4 -10 5 574.83 567.27 51.14 o
 -3 -10 5 1441.83 1590.72 88.65 o
 -2 -10 5 2336.64 2256.86 122.74 o
 -1 -10 5 3812.88 3229.10 162.29 o
 0 -10 5 3975.14 3744.61 192.98 o
 1 -10 5 243.28 227.07 40.91 o
 2 -10 5 739.06 958.67 77.05 o
 3 -10 5 187.71 157.52 54.55 o
 4 -10 5 64.72 77.74 50.46 o
 5 -10 5 396.94 296.62 70.92 o
 6 -10 5 125.17 141.15 77.74 o
 7 -10 5 76.63 109.10 84.55 o
 -9 -9 5 251.94 446.57 97.51 o
 -8 -9 5 138.39 62.73 68.87 o
 -6 -9 5 751.43 830.48 72.28 o
 -5 -9 5 594.24 683.19 38.83 o
 -4 -9 5 543.55 507.26 29.31 o
 -3 -9 5 1413.20 1360.92 79.78 o
 -2 -9 5 502.31 520.22 47.73 o
 -1 -9 5 3000.60 3546.86 172.52 o
 0 -9 5 3926.34 3768.41 182.07 o
 1 -9 5 208.25 252.98 41.60 o
 2 -9 5 443.12 523.63 60.69 o
 3 -9 5 633.94 661.37 79.78 o
 4 -9 5 9.46 47.05 47.05 o
 5 -9 5 262.57 267.98 75.69 o
 6 -9 5 240.96 263.21 80.46 o
 7 -9 5 80.66 40.23 72.96 o
 -9 -8 5 10.55 2.73 68.87 o
 -8 -8 5 113.58 105.01 68.19 o
 -7 -8 5 1004.17 938.22 82.51 o
 -6 -8 5 75.67 117.29 36.82 o
 -5 -8 5 398.93 467.51 32.41 o
 -4 -8 5 1648.72 1583.35 62.41 o
 -3 -8 5 989.90 1122.16 45.62 o
 -2 -8 5 3595.81 3585.73 178.66 o
 -1 -8 5 857.82 836.61 57.96 o
 0 -8 5 2095.90 1936.37 106.38 o
 1 -8 5 390.51 334.13 43.64 o
 2 -8 5 1472.22 1568.22 101.60 o
 3 -8 5 114.09 160.24 51.14 o
 4 -8 5 405.06 364.06 64.78 o
 5 -8 5 229.35 355.20 78.42 o
 6 -8 5 62.01 -41.60 55.23 o
 7 -8 5 26.57 31.37 75.01 o
 -9 -7 5 299.96 257.07 78.42 o
 -7 -7 5 226.51 281.62 51.14 o
 -6 -7 5 592.66 644.69 43.47 o
 -5 -7 5 498.03 630.97 62.05 o
 -4 -7 5 551.49 497.72 41.25 o
 -3 -7 5 2741.03 3118.72 121.68 o
 -2 -7 5 2112.67 1991.60 107.06 o
 -1 -7 5 6262.26 6278.25 295.26 o
 0 -7 5 2334.35 2251.40 123.42 o
 1 -7 5 17.21 64.10 29.32 o
 2 -7 5 96.09 419.98 53.87 o
 3 -7 5 671.82 516.12 66.83 o
 4 -7 5 336.92 348.38 64.78 o
 5 -7 5 191.73 375.65 75.69 o
 6 -7 5 494.48 632.73 93.42 o
 7 -7 5 284.35 100.92 82.51 o
 -9 -6 5 0.53 -60.69 60.69 o
 -8 -6 5 13.31 -32.05 37.50 o
 -7 -6 5 362.61 373.61 57.28 o
 -6 -6 5 6.89 11.46 20.87 o
 -5 -6 5 1997.38 1833.10 73.87 o
 -4 -6 5 519.87 555.23 57.28 o
 -3 -6 5 3796.42 3802.45 130.64 o
 -2 -6 5 917.39 1122.26 68.19 o
 -1 -6 5 275.70 402.93 41.60 o
 0 -6 5 1710.72 1820.45 98.87 o
 1 -6 5 125.53 102.28 29.32 o
 2 -6 5 2604.58 2594.33 135.70 o
 3 -6 5 209.17 156.15 47.05 o
 4 -6 5 668.45 825.02 89.33 o
 5 -6 5 11.01 24.55 55.92 o
 6 -6 5 81.12 139.11 70.23 o
 7 -6 5 29.29 65.46 79.10 o
 -9 -5 5 369.92 398.16 84.55 o
 -8 -5 5 332.70 260.48 58.64 o
 -7 -5 5 427.84 450.26 43.15 o
 -6 -5 5 72.62 93.82 23.98 o
 -5 -5 5 658.82 616.41 38.92 o
 -4 -5 5 170.40 195.47 28.98 o
 -3 -5 5 4985.93 5266.63 176.95 o
 -2 -5 5 7080.52 6278.88 205.88 o
 -1 -5 5 3302.02 3065.52 156.15 o
 0 -5 5 1612.36 1592.76 86.60 o
 1 -5 5 228.79 200.48 35.46 o
 2 -5 5 464.96 604.77 60.69 o
 3 -5 5 37.91 16.37 38.19 o
 4 -5 5 536.89 628.64 75.01 o
 5 -5 5 35.45 53.19 56.60 o
 6 -5 5 291.27 249.57 79.78 o
 7 -5 5 12.48 84.55 75.01 o
 -9 -4 5 62.81 -5.46 64.10 o
 -8 -4 5 152.03 333.45 60.01 o
 -7 -4 5 86.69 60.69 41.60 o
 -6 -4 5 15.95 37.16 50.80 o
 -5 -4 5 4925.06 4605.71 158.60 o
 -4 -4 5 1114.41 1258.96 54.65 o
 -3 -4 5 503.24 471.49 56.60 o
 -2 -4 5 1920.55 2002.21 74.48 o
 -1 -4 5 1591.60 1799.99 101.60 o
 0 -4 5 3907.17 3754.09 185.47 o
 1 -4 5 405.06 316.40 40.23 o
 2 -4 5 1172.42 1132.49 79.10 o
 3 -4 5 264.02 207.30 47.05 o
 4 -4 5 1424.36 1320.01 107.06 o
 5 -4 5 19.69 23.87 53.87 o
 6 -4 5 204.38 158.88 69.55 o
 7 -4 5 125.79 90.01 75.69 o
 -9 -3 5 103.19 35.46 60.69 o
 -8 -3 5 43.90 20.46 43.64 o
 -7 -3 5 1099.94 1128.40 96.15 o
 -6 -3 5 974.76 881.49 52.23 o
 -5 -3 5 83.46 116.19 26.25 o
 -4 -3 5 802.45 1015.96 47.35 o
 -3 -3 5 3855.63 3429.36 122.22 o
 -2 -3 5 4064.44 4027.99 189.23 o
 -1 -3 5 127.74 381.11 40.91 o
 0 -3 5 564.95 478.62 47.05 o
 1 -3 5 392.82 441.80 47.05 o
 2 -3 5 405.91 420.66 48.41 o
 3 -3 5 481.61 400.88 55.23 o
 4 -3 5 635.28 563.86 72.28 o
 5 -3 5 118.27 184.79 62.73 o
 6 -3 5 466.43 453.39 85.24 o
 7 -3 5 75.12 70.23 72.96 o
 -9 -2 5 33.82 14.32 56.60 o
 -8 -2 5 464.85 498.40 70.23 o
 -7 -2 5 19.77 44.32 40.91 o
 -6 -2 5 79.43 111.44 26.12 o
 -5 -2 5 1548.48 1465.69 65.04 o
 -4 -2 5 1090.42 951.69 58.30 o
 -3 -2 5 859.73 818.92 39.78 o
 -2 -2 5 9967.87 10202.32 333.85 o
 -1 -2 5 3337.82 2902.32 82.11 o
 0 -2 5 385.40 316.98 27.62 o
 1 -2 5 1645.04 1929.55 100.92 o
 2 -2 5 79.26 147.97 32.05 o
 3 -2 5 591.27 545.45 62.73 o
 4 -2 5 835.86 851.62 83.87 o
 5 -2 5 321.67 267.30 65.46 o
 6 -2 5 10.32 79.10 62.05 o
 7 -2 5 73.64 135.74 63.42 o
 -9 -1 5 27.52 51.82 62.73 o
 -8 -1 5 122.63 22.50 46.37 o
 -7 -1 5 248.49 267.30 54.55 o
 -6 -1 5 2433.68 2350.98 172.14 o
 -5 -1 5 337.54 303.17 31.30 o
 -4 -1 5 11350.30 11571.58 378.46 o
 -3 -1 5 2122.20 2695.58 97.88 o
 -2 -1 5 381.71 392.25 39.21 o
 -1 -1 5 252.53 562.08 65.00 o
 0 -1 5 1564.76 1357.02 55.35 o
 1 -1 5 2747.93 2195.57 194.00 o
 2 -1 5 568.61 547.49 55.92 o
 3 -1 5 2878.02 2728.66 147.97 o
 4 -1 5 593.58 771.15 78.42 o
 5 -1 5 135.30 273.44 61.37 o
 6 -1 5 37.45 33.85 42.17 o
 7 -1 5 87.96 115.57 51.15 o
 -9 0 5 42.53 32.73 54.55 o
 -8 0 5 723.45 681.14 81.83 o
 -7 0 5 3.98 72.96 44.32 o
 -6 0 5 164.64 301.54 35.92 o
 -5 0 5 21.67 33.90 20.45 o
 -4 0 5 4864.17 5015.66 173.10 o
 -3 0 5 1560.22 1424.41 59.28 o
 -2 0 5 6668.37 6884.96 183.72 o
 -1 0 5 1856.37 1775.85 53.55 o
 0 0 5 270.36 362.68 49.74 o
 1 0 5 493.46 602.49 113.88 o
 2 0 5 1828.26 1694.16 131.91 o
 3 0 5 73.83 98.87 39.55 o
 4 0 5 206.56 431.22 44.60 o
 5 0 5 387.07 435.62 50.37 o
 6 0 5 2.35 -14.75 37.83 o
 7 0 5 84.33 49.59 48.31 o
 -9 1 5 27.52 156.84 64.78 o
 -8 1 5 122.63 97.51 49.10 o
 -7 1 5 248.49 212.07 51.82 o
 -6 1 5 2433.67 2285.87 114.52 o
 -5 1 5 337.54 248.83 51.48 o
 -4 1 5 11350.30 11621.33 379.90 o
 -3 1 5 2122.20 2684.34 140.47 o
 -2 1 5 381.71 411.69 20.64 o
 -1 1 5 252.53 536.45 57.83 o
 0 1 5 1564.76 1486.50 56.74 o
 1 1 5 2747.93 2151.36 95.81 o
 2 1 5 568.61 569.88 38.76 o
 3 1 5 2878.02 2549.29 104.67 o
 4 1 5 593.58 450.69 46.70 o
 5 1 5 135.30 141.08 38.91 o
 6 1 5 37.45 -9.31 38.05 o
 7 1 5 87.96 152.20 51.70 o
 -9 2 5 33.82 -39.32 39.32 o
 -8 2 5 464.85 455.44 75.69 o
 -7 2 5 19.77 40.23 42.28 o
 -6 2 5 79.43 50.89 25.63 o
 -5 2 5 1548.48 1485.23 68.70 o
 -4 2 5 1090.42 937.02 49.12 o
 -3 2 5 859.73 852.96 34.12 o
 -2 2 5 9967.87 10310.94 271.12 o
 -1 2 5 3337.82 2969.91 83.91 o
 0 2 5 385.40 390.21 22.88 o
 1 2 5 1645.05 1650.39 98.16 o
 2 2 5 79.26 78.61 25.57 o
 3 2 5 591.27 507.32 62.39 o
 4 2 5 835.86 843.06 58.25 o
 5 2 5 321.67 311.87 44.60 o
 6 2 5 10.32 -42.63 52.85 o
 7 2 5 73.64 55.45 47.55 o
 -9 3 5 103.19 104.49 61.71 o
 -8 3 5 43.90 25.94 37.50 o
 -7 3 5 1099.94 1029.52 98.87 o
 -6 3 5 974.76 1023.22 63.40 o
 -5 3 5 83.46 154.73 27.47 o
 -4 3 5 802.45 1007.32 52.05 o
 -3 3 5 3855.62 3572.85 101.33 o
 -2 3 5 4064.44 4098.94 113.23 o
 -1 3 5 127.74 368.56 31.89 o
 0 3 5 564.95 502.32 40.22 o
 1 3 5 392.82 410.61 30.38 o
 2 3 5 405.91 526.44 54.21 o
 3 3 5 481.61 473.03 40.77 o
 4 3 5 635.28 610.29 92.74 o
 5 3 5 118.27 154.62 39.51 o
 6 3 5 466.43 525.46 87.62 o
 7 3 5 75.12 95.46 74.33 o
 -9 4 5 62.81 88.65 64.10 o
 -8 4 5 152.03 217.16 44.99 o
 -7 4 5 86.69 128.59 55.23 o
 -6 4 5 15.95 -25.19 26.40 o
 -5 4 5 4925.06 4492.04 163.94 o
 -4 4 5 1114.41 1296.12 47.26 o
 -3 4 5 503.24 454.71 31.30 o
 -2 4 5 1920.55 1991.10 61.52 o
 -1 4 5 1591.60 1881.38 57.77 o
 0 4 5 3907.17 3776.35 119.17 o
 1 4 5 405.06 348.67 47.70 o
 2 4 5 1172.42 1149.71 55.02 o
 3 4 5 264.02 232.56 31.06 o
 4 4 5 1424.36 1396.40 91.03 o
 5 4 5 19.69 -0.66 48.07 o
 6 4 5 204.38 228.17 46.52 o
 7 4 5 125.79 51.82 68.87 o
 -9 5 5 369.92 484.08 88.65 o
 -8 5 5 332.70 470.12 53.72 o
 -7 5 5 427.84 545.18 51.70 o
 -6 5 5 72.62 64.25 23.79 o
 -5 5 5 658.82 694.22 48.57 o
 -4 5 5 170.40 175.53 19.64 o
 -3 5 5 4985.93 5294.79 125.91 o
 -2 5 5 7080.53 6187.12 169.32 o
 -1 5 5 3302.01 3146.38 90.05 o
 0 5 5 1612.37 1385.00 47.96 o
 1 5 5 228.78 202.50 32.73 o
 2 5 5 464.96 515.41 38.62 o
 3 5 5 37.91 57.77 35.46 o
 4 5 5 536.89 594.47 74.67 o
 5 5 5 35.45 60.34 34.54 o
 6 5 5 291.27 341.50 50.00 o
 7 5 5 12.48 73.64 72.96 o
 -9 6 5 0.53 42.28 60.69 o
 -8 6 5 13.31 -7.40 35.90 o
 -7 6 5 362.61 374.93 44.83 o
 -6 6 5 6.89 37.26 28.83 o
 -5 6 5 1997.37 1856.53 65.57 o
 -4 6 5 519.87 639.57 56.58 o
 -3 6 5 3796.42 3823.57 94.07 o
 -2 6 5 917.39 1066.19 47.43 o
 -1 6 5 275.70 426.94 26.07 o
 0 6 5 1710.71 1685.48 55.55 o
 1 6 5 125.53 94.64 19.42 o
 2 6 5 2604.59 2207.84 163.65 o
 3 6 5 209.17 115.11 38.87 o
 4 6 5 668.45 707.05 53.20 o
 5 6 5 11.01 36.52 32.27 o
 6 6 5 81.12 94.10 64.10 o
 7 6 5 29.29 78.42 70.92 o
 -9 7 5 299.96 236.62 74.33 o
 -8 7 5 19.45 -3.73 55.92 o
 -7 7 5 226.51 241.29 40.16 o
 -6 7 5 592.66 603.57 76.79 o
 -5 7 5 498.03 704.60 40.24 o
 -4 7 5 551.49 527.47 26.80 o
 -3 7 5 2741.03 2898.23 75.68 o
 -2 7 5 2112.68 1990.51 52.09 o
 -1 7 5 6262.23 6229.63 170.66 o
 0 7 5 2334.36 2307.43 71.15 o
 1 7 5 17.21 19.68 16.69 o
 2 7 5 96.09 311.77 34.40 o
 3 7 5 671.82 670.18 57.62 o
 4 7 5 336.92 333.63 38.31 o
 5 7 5 191.73 238.15 41.62 o
 6 7 5 494.48 491.58 89.33 o
 7 7 5 284.35 274.12 83.19 o
 -9 8 5 10.55 11.59 60.69 o
 -8 8 5 113.58 153.17 43.10 o
 -7 8 5 1004.18 1172.95 61.39 o
 -6 8 5 75.67 148.22 28.19 o
 -5 8 5 398.93 446.62 32.62 o
 -4 8 5 1648.72 1645.97 56.29 o
 -3 8 5 989.90 1110.81 35.44 o
 -2 8 5 3595.82 3635.59 88.77 o
 -1 8 5 857.82 741.75 35.43 o
 0 8 5 2095.90 1864.23 76.86 o
 1 8 5 390.51 321.31 24.27 o
 2 8 5 1472.22 1471.21 80.12 o
 3 8 5 114.09 123.41 27.02 o
 4 8 5 405.06 444.30 66.48 o
 5 8 5 229.35 213.50 76.37 o
 6 8 5 62.01 15.68 58.64 o
 7 8 5 26.57 96.83 75.01 o
 -9 9 5 251.94 385.88 81.83 o
 -8 9 5 138.39 178.27 44.27 o
 -7 9 5 187.84 189.02 33.83 o
 -6 9 5 751.43 860.80 82.85 o
 -5 9 5 594.24 739.58 43.35 o
 -4 9 5 543.55 575.65 28.91 o
 -3 9 5 1413.19 1337.32 41.18 o
 -2 9 5 502.31 518.25 21.65 o
 -1 9 5 3000.61 3401.68 85.02 o
 0 9 5 3926.34 3530.86 126.55 o
 1 9 5 208.25 221.96 21.87 o
 2 9 5 443.13 460.24 63.08 o
 3 9 5 633.94 702.38 47.99 o
 4 9 5 9.46 48.49 27.37 o
 5 9 5 262.57 214.80 65.46 o
 6 9 5 240.96 366.11 81.83 o
 7 9 5 80.66 108.42 76.37 o
 -9 10 5 59.07 78.42 73.64 o
 -8 10 5 545.77 568.17 83.19 o
 -7 10 5 231.96 226.44 34.33 o
 -6 10 5 235.36 251.51 32.52 o
 -5 10 5 115.65 125.48 21.00 o
 -4 10 5 574.83 583.47 30.24 o
 -3 10 5 1441.83 1549.67 46.51 o
 -2 10 5 2336.63 2358.47 61.91 o
 -1 10 5 3812.89 3168.65 80.33 o
 0 10 5 3975.13 3887.85 96.13 o
 1 10 5 243.27 227.17 22.18 o
 2 10 5 739.06 893.97 49.97 o
 3 10 5 187.71 234.80 31.41 o
 4 10 5 64.72 61.50 33.07 o
 5 10 5 396.93 274.12 74.33 o
 6 10 5 125.17 181.38 77.74 o
 7 10 5 76.63 105.01 82.51 o
 -9 11 5 28.93 -27.96 70.23 o
 -8 11 5 357.04 414.42 62.70 o
 -7 11 5 126.67 100.26 32.61 o
 -6 11 5 1211.07 1166.21 59.90 o
 -5 11 5 79.50 27.86 18.24 o
 -4 11 5 787.55 843.60 35.83 o
 -3 11 5 750.66 849.52 45.94 o
 -2 11 5 446.22 511.64 32.69 o
 -1 11 5 1116.74 1493.80 44.63 o
 0 11 5 2792.11 2805.56 73.85 o
 1 11 5 877.96 930.30 40.73 o
 2 11 5 1178.10 993.94 52.59 o
 3 11 5 509.77 450.36 68.19 o
 4 11 5 107.82 111.83 51.82 o
 5 11 5 38.63 15.00 55.23 o
 6 11 5 15.88 4.09 66.14 o
 7 11 5 33.60 -66.83 66.83 o
 -9 12 5 12.20 70.92 79.10 o
 -8 12 5 357.58 438.22 58.49 o
 -7 12 5 16.63 18.66 28.61 o
 -6 12 5 93.94 193.49 38.70 o
 -5 12 5 141.43 140.04 22.66 o
 -4 12 5 297.83 318.49 25.12 o
 -3 12 5 278.58 296.71 36.92 o
 -2 12 5 4411.52 3991.04 97.74 o
 -1 12 5 881.24 885.45 32.52 o
 0 12 5 2232.94 2130.23 59.16 o
 1 12 5 507.65 577.25 32.69 o
 2 12 5 136.50 237.73 28.29 o
 3 12 5 2487.61 2180.74 91.36 o
 4 12 5 305.33 261.16 68.87 o
 5 12 5 540.69 419.98 79.10 o
 6 12 5 54.35 124.10 72.96 o
 7 12 5 129.66 167.75 82.51 o
 -8 13 5 88.83 168.34 48.41 o
 -7 13 5 216.76 258.97 38.67 o
 -6 13 5 645.69 782.95 56.62 o
 -5 13 5 1087.29 1110.65 47.67 o
 -4 13 5 352.50 352.48 26.34 o
 -3 13 5 340.70 441.89 27.07 o
 -2 13 5 1922.13 1893.14 53.52 o
 -1 13 5 165.56 280.85 19.94 o
 0 13 5 4251.74 4147.80 104.16 o
 1 13 5 1476.30 1363.66 52.47 o
 2 13 5 192.69 168.33 26.11 o
 3 13 5 2335.11 1982.30 86.33 o
 4 13 5 277.15 170.47 60.01 o
 5 13 5 179.40 84.55 63.42 o
 6 13 5 11.41 53.19 68.19 o
 -8 14 5 287.60 454.75 97.51 o
 -7 14 5 533.84 585.02 65.10 o
 -6 14 5 99.49 114.90 30.57 o
 -5 14 5 139.44 177.11 25.47 o
 -4 14 5 226.65 208.08 23.09 o
 -3 14 5 380.14 402.32 25.31 o
 -2 14 5 800.15 799.16 32.44 o
 -1 14 5 915.61 826.24 32.27 o
 0 14 5 1136.98 997.65 36.37 o
 1 14 5 916.96 858.80 35.56 o
 2 14 5 783.91 701.91 44.78 o
 3 14 5 64.06 84.55 49.78 o
 4 14 5 477.46 473.17 77.74 o
 5 14 5 369.72 275.48 72.28 o
 6 14 5 35.03 21.14 66.14 o
 -8 15 5 7.00 18.41 67.51 o
 -7 15 5 57.51 42.45 31.95 o
 -6 15 5 113.41 116.76 27.29 o
 -5 15 5 91.59 110.68 24.03 o
 -4 15 5 437.59 442.06 34.82 o
 -3 15 5 70.64 104.53 23.98 o
 -2 15 5 138.10 250.90 21.47 o
 -1 15 5 1653.51 1642.21 50.42 o
 0 15 5 797.96 750.09 34.14 o
 1 15 5 514.41 562.85 29.86 o
 2 15 5 490.07 512.94 89.67 o
 3 15 5 1346.85 1270.23 111.83 o
 4 15 5 688.62 798.43 94.10 o
 5 15 5 150.41 54.55 59.32 o
 6 15 5 20.80 61.37 70.92 o
 -8 16 5 2.05 72.28 77.05 o
 -7 16 5 94.96 95.34 36.36 o
 -6 16 5 26.35 51.10 35.94 o
 -5 16 5 346.25 331.64 31.38 o
 -4 16 5 245.21 255.61 29.72 o
 -3 16 5 848.56 778.88 41.83 o
 -2 16 5 110.92 193.04 24.51 o
 -1 16 5 626.05 704.95 45.26 o
 0 16 5 596.18 624.81 54.72 o
 1 16 5 975.96 755.06 34.76 o
 2 16 5 741.50 768.42 82.51 o
 3 16 5 54.97 99.56 51.14 o
 4 16 5 43.14 38.19 58.64 o
 5 16 5 108.94 30.69 60.01 o
 6 16 5 18.86 44.32 72.28 o
 -8 17 5 2.49 -9.55 80.46 o
 -7 17 5 67.27 -36.14 68.87 o
 -6 17 5 178.72 216.55 36.91 o
 -5 17 5 10.85 55.66 23.16 o
 -4 17 5 47.57 103.22 22.04 o
 -3 17 5 247.09 287.35 34.45 o
 -2 17 5 396.15 453.42 27.71 o
 -1 17 5 1018.34 835.52 35.48 o
 0 17 5 1389.18 1280.93 44.94 o
 1 17 5 102.74 98.84 19.44 o
 2 17 5 61.45 47.05 42.96 o
 3 17 5 177.28 215.48 60.01 o
 4 17 5 516.27 424.75 80.46 o
 5 17 5 150.44 128.20 70.92 o
 6 17 5 223.34 191.61 79.78 o
 -8 18 5 40.16 0.68 78.42 o
 -7 18 5 70.85 94.78 77.05 o
 -6 18 5 522.49 603.27 58.27 o
 -5 18 5 484.43 515.55 37.75 o
 -4 18 5 98.67 145.28 24.85 o
 -3 18 5 409.19 385.06 28.37 o
 -2 18 5 116.50 123.75 19.67 o
 -1 18 5 327.10 355.31 25.72 o
 0 18 5 1091.66 1028.14 40.50 o
 1 18 5 867.96 800.95 57.81 o
 2 18 5 854.12 752.06 86.60 o
 3 18 5 47.30 42.28 52.51 o
 4 18 5 220.10 163.65 65.46 o
 5 18 5 43.57 12.27 66.83 o
 6 18 5 23.10 -19.09 70.92 o
 -8 19 5 17.25 -6.82 83.87 o
 -7 19 5 78.47 143.88 89.33 o
 -6 19 5 39.70 87.26 30.23 o
 -5 19 5 15.42 51.22 25.69 o
 -4 19 5 171.94 116.13 25.41 o
 -3 19 5 1297.28 1133.36 46.08 o
 -2 19 5 945.26 1003.05 41.82 o
 -1 19 5 189.13 173.54 21.49 o
 0 19 5 1064.54 1265.96 46.16 o
 1 19 5 66.08 57.87 24.61 o
 2 19 5 111.21 208.66 57.96 o
 3 19 5 28.52 17.05 51.14 o
 4 19 5 315.47 262.53 67.51 o
 5 19 5 31.53 71.60 62.73 o
 -7 20 5 48.61 58.64 81.83 o
 -6 20 5 108.23 190.27 53.36 o
 -5 20 5 224.27 250.42 36.32 o
 -4 20 5 96.73 95.51 24.67 o
 -3 20 5 160.87 249.59 26.53 o
 -2 20 5 20.48 50.90 20.33 o
 -1 20 5 95.12 89.23 20.16 o
 0 20 5 145.35 155.31 22.32 o
 1 20 5 318.18 295.30 33.81 o
 2 20 5 702.27 676.96 76.37 o
 3 20 5 332.54 364.06 68.19 o
 4 20 5 464.80 388.61 80.46 o
 5 20 5 132.79 104.33 68.87 o
 -7 21 5 15.54 -16.37 83.19 o
 -6 21 5 23.10 7.27 45.81 o
 -5 21 5 38.73 67.39 28.48 o
 -4 21 5 369.77 461.81 47.53 o
 -3 21 5 1680.16 1690.23 59.76 o
 -2 21 5 850.64 912.82 68.25 o
 -1 21 5 4.80 11.25 19.98 o
 0 21 5 1782.55 1734.28 58.09 o
 1 21 5 130.44 152.57 29.97 o
 2 21 5 188.86 136.82 72.28 o
 3 21 5 140.59 39.55 54.55 o
 4 21 5 3.56 -19.09 61.37 o
 5 21 5 17.12 71.60 67.51 o
 -7 22 5 27.22 45.00 88.65 o
 -6 22 5 48.05 111.74 52.91 o
 -5 22 5 76.21 95.69 30.50 o
 -4 22 5 12.49 47.41 26.13 o
 -3 22 5 99.36 94.56 25.35 o
 -2 22 5 1761.24 1622.70 57.71 o
 -1 22 5 151.30 128.91 23.72 o
 0 22 5 344.68 357.60 70.61 o
 1 22 5 47.11 35.70 26.52 o
 2 22 5 42.70 38.04 29.37 o
 3 22 5 193.86 157.52 66.14 o
 4 22 5 194.56 163.65 66.14 o
 5 22 5 94.89 24.55 62.05 o
 -7 23 5 4.50 -70.23 70.23 o
 -6 23 5 312.61 341.12 63.01 o
 -5 23 5 1.47 -8.69 47.05 o
 -4 23 5 669.03 635.86 42.25 o
 -3 23 5 36.68 59.55 24.37 o
 -2 23 5 31.14 76.36 24.46 o
 -1 23 5 11.25 4.79 20.93 o
 0 23 5 214.01 216.21 43.73 o
 1 23 5 544.09 445.96 40.50 o
 2 23 5 31.17 36.32 30.25 o
 3 23 5 312.87 482.03 86.60 o
 4 23 5 79.89 83.19 66.83 o
 5 23 5 41.04 107.06 75.01 o
 -6 24 5 46.53 -1.22 54.72 o
 -5 24 5 7.32 59.47 47.70 o
 -4 24 5 139.33 140.00 30.02 o
 -3 24 5 1267.41 1329.48 57.32 o
 -2 24 5 301.94 311.47 31.52 o
 -1 24 5 292.61 236.27 33.60 o
 0 24 5 10.96 25.98 28.14 o
 1 24 5 650.36 571.13 51.97 o
 2 24 5 24.15 25.39 30.69 o
 3 24 5 27.80 98.87 62.73 o
 4 24 5 3.45 4.09 66.83 o
 -6 25 5 89.31 47.28 55.87 o
 -5 25 5 5.64 54.63 48.31 o
 -4 25 5 89.84 136.40 49.70 o
 -3 25 5 309.42 328.29 34.77 o
 -2 25 5 35.97 29.27 24.54 o
 -1 25 5 22.16 8.41 26.36 o
 0 25 5 42.56 19.94 38.05 o
 1 25 5 164.52 192.29 35.52 o
 2 25 5 111.94 83.45 35.14 o
 3 25 5 183.20 167.06 70.23 o
 4 25 5 69.48 80.46 70.92 o
 -6 26 5 19.28 -25.13 62.05 o
 -5 26 5 46.03 16.55 48.91 o
 -4 26 5 57.51 71.99 50.19 o
 -3 26 5 10.79 -17.58 26.05 o
 -2 26 5 52.87 7.20 25.33 o
 -1 26 5 388.86 407.61 41.93 o
 0 26 5 30.11 -6.35 29.57 o
 1 26 5 85.86 99.12 33.64 o
 2 26 5 58.24 36.08 33.53 o
 3 26 5 53.38 -29.32 64.10 o
 4 26 5 9.79 -62.05 66.14 o
 -5 27 5 30.12 115.25 56.77 o
 -4 27 5 6.32 -20.07 46.47 o
 -3 27 5 70.15 92.18 49.31 o
 -2 27 5 124.01 102.94 34.86 o
 -1 27 5 39.16 41.34 30.57 o
 0 27 5 17.22 53.02 32.34 o
 1 27 5 92.19 112.41 34.96 o
 2 27 5 6.12 35.29 42.57 o
 3 27 5 57.27 57.28 68.87 o
 -5 28 5 103.93 45.69 62.39 o
 -4 28 5 28.11 63.52 49.30 o
 -3 28 5 40.57 -33.15 60.01 o
 -2 28 5 30.22 73.99 42.51 o
 -1 28 5 165.32 128.95 34.61 o
 0 28 5 192.32 183.52 49.64 o
 1 28 5 75.26 83.27 63.47 o
 2 28 5 94.34 143.76 91.03 o
 3 28 5 2.96 68.87 72.28 o
 -4 29 5 39.68 53.70 53.36 o
 -3 29 5 94.06 30.51 50.09 o
 -2 29 5 37.94 36.00 55.32 o
 -1 29 5 20.83 -10.83 31.55 o
 0 29 5 28.13 11.28 33.52 o
 1 29 5 14.47 68.44 43.85 o
 2 29 5 0.57 -32.12 42.88 o
 -4 30 5 19.67 -26.56 50.67 o
 -3 30 5 27.68 98.97 53.85 o
 -2 30 5 40.20 46.02 49.28 o
 -1 30 5 2.35 -16.89 34.29 o
 0 30 5 56.40 60.08 36.59 o
 1 30 5 78.22 76.87 47.89 o
 2 30 5 61.55 -40.86 47.25 o
 -3 31 5 54.22 158.22 58.65 o
 -2 31 5 103.59 146.51 78.76 o
 -1 31 5 12.10 67.50 50.60 o
 0 31 5 49.66 24.71 45.52 o
 1 31 5 62.14 20.48 44.83 o
 -1 32 5 17.44 60.99 53.42 o
 -4 -29 6 21.56 38.19 64.78 o
 1 -29 6 39.88 79.10 70.23 o
 -4 -28 6 8.35 12.96 59.32 o
 1 -28 6 163.97 245.48 76.37 o
 2 -28 6 29.90 127.51 75.69 o
 -5 -27 6 193.68 235.25 77.74 o
 -4 -27 6 3.09 -52.51 52.51 o
 0 -27 6 46.66 95.46 58.64 o
 1 -27 6 22.58 32.73 60.01 o
 2 -27 6 85.50 219.57 78.42 o
 3 -27 6 84.67 60.01 79.10 o
 -5 -26 6 104.04 52.51 64.10 o
 0 -26 6 66.23 59.32 55.23 o
 1 -26 6 96.44 94.78 62.73 o
 2 -26 6 65.13 11.59 66.83 o
 3 -26 6 8.70 -57.28 69.55 o
 -6 -25 6 2.34 56.60 63.42 o
 0 -25 6 10.86 -29.32 46.37 o
 1 -25 6 385.87 400.88 79.78 o
 2 -25 6 72.68 207.98 72.96 o
 3 -25 6 27.93 -59.32 70.92 o
 -6 -24 6 25.05 42.28 72.96 o
 -1 -24 6 121.87 275.48 57.28 o
 0 -24 6 382.29 345.65 65.46 o
 1 -24 6 13.41 -32.05 48.41 o
 2 -24 6 6.84 113.19 63.42 o
 3 -24 6 157.96 215.48 81.83 o
 4 -24 6 67.59 131.61 87.28 o
 -6 -23 6 38.93 72.96 62.05 o
 -1 -23 6 51.86 115.92 47.73 o
 0 -23 6 46.12 37.50 48.41 o
 1 -23 6 1149.79 1223.18 113.88 o
 2 -23 6 145.11 162.97 65.46 o
 3 -23 6 40.50 -30.00 56.60 o
 4 -23 6 2.52 95.46 71.60 o
 -7 -22 6 21.31 182.75 79.10 o
 -2 -22 6 244.21 266.62 51.82 o
 -1 -22 6 123.52 71.60 43.64 o
 0 -22 6 169.29 161.61 53.19 o
 1 -22 6 30.35 -44.32 46.37 o
 2 -22 6 31.68 -4.77 55.92 o
 3 -22 6 234.01 276.85 81.15 o
 4 -22 6 11.79 70.23 77.05 o
 -7 -21 6 6.31 0.00 70.92 o
 -2 -21 6 134.07 120.69 42.96 o
 -1 -21 6 281.28 257.07 52.51 o
 0 -21 6 380.52 488.85 69.55 o
 1 -21 6 351.98 349.74 67.51 o
 2 -21 6 205.57 134.33 61.37 o
 3 -21 6 59.26 34.09 62.73 o
 4 -21 6 17.74 45.69 71.60 o
 5 -21 6 64.97 -10.23 81.15 o
 -7 -20 6 193.61 77.74 74.33 o
 -2 -20 6 900.84 922.53 80.46 o
 -1 -20 6 93.96 178.66 45.69 o
 0 -20 6 440.45 383.16 64.10 o
 1 -20 6 43.91 49.10 45.00 o
 2 -20 6 230.49 210.70 64.78 o
 3 -20 6 344.15 311.62 80.46 o
 4 -20 6 86.79 56.60 75.69 o
 5 -20 6 9.55 25.91 82.51 o
 -3 -19 6 331.01 298.67 44.32 o
 -2 -19 6 1465.06 1283.87 94.78 o
 -1 -19 6 15.80 79.10 39.55 o
 0 -19 6 378.20 393.38 61.37 o
 1 -19 6 54.90 62.73 46.37 o
 2 -19 6 9.72 -6.82 51.14 o
 3 -19 6 56.07 152.74 63.42 o
 4 -19 6 26.98 48.41 68.87 o
 5 -19 6 52.80 137.74 76.37 o
 -8 -18 6 58.56 157.52 83.19 o
 -3 -18 6 47.03 147.97 35.46 o
 -2 -18 6 276.30 368.15 51.14 o
 -1 -18 6 64.13 106.38 39.55 o
 0 -18 6 1067.29 1082.03 92.06 o
 1 -18 6 63.58 117.97 46.37 o
 2 -18 6 984.73 1238.18 115.24 o
 3 -18 6 78.52 -0.68 51.14 o
 4 -18 6 101.16 220.25 71.60 o
 5 -18 6 83.31 173.20 83.87 o
 -8 -17 6 42.54 -59.32 69.55 o
 -3 -17 6 250.51 320.49 43.64 o
 -2 -17 6 3562.45 3079.77 174.56 o
 -1 -17 6 156.06 157.52 42.28 o
 0 -17 6 193.69 311.62 54.55 o
 1 -17 6 1952.37 1804.77 124.10 o
 2 -17 6 128.85 150.02 57.96 o
 3 -17 6 96.47 75.69 54.55 o
 4 -17 6 127.18 134.33 69.55 o
 5 -17 6 90.88 0.00 78.42 o
 -8 -16 6 93.09 65.46 68.19 o
 -4 -16 6 596.18 762.97 64.78 o
 -3 -16 6 531.46 655.23 60.01 o
 -2 -16 6 1106.83 877.53 73.64 o
 -1 -16 6 317.80 281.62 47.73 o
 0 -16 6 245.05 284.35 49.78 o
 1 -16 6 1766.26 1690.28 117.29 o
 2 -16 6 224.54 310.94 65.46 o
 3 -16 6 428.01 364.74 72.28 o
 4 -16 6 79.64 148.65 64.78 o
 5 -16 6 15.69 88.65 79.78 o
 6 -16 6 88.13 188.20 88.65 o
 -8 -15 6 22.99 -5.46 67.51 o
 -4 -15 6 729.96 714.56 61.37 o
 -3 -15 6 491.35 435.66 49.10 o
 -2 -15 6 947.46 922.53 72.96 o
 -1 -15 6 48.78 90.01 35.46 o
 0 -15 6 210.75 137.06 40.91 o
 1 -15 6 831.91 731.60 78.42 o
 2 -15 6 290.59 227.07 55.23 o
 3 -15 6 15.41 -28.64 50.46 o
 4 -15 6 591.99 529.76 87.28 o
 5 -15 6 85.23 28.64 72.96 o
 6 -15 6 18.15 34.78 72.28 o
 -5 -14 6 285.42 279.58 43.64 o
 -4 -14 6 110.33 233.21 38.19 o
 -3 -14 6 277.04 293.90 42.96 o
 -2 -14 6 1785.43 1345.92 94.10 o
 -1 -14 6 1002.73 989.36 77.05 o
 0 -14 6 83.25 138.42 40.23 o
 1 -14 6 1023.05 1030.20 92.74 o
 2 -14 6 167.01 244.80 58.64 o
 3 -14 6 133.43 158.20 62.05 o
 4 -14 6 373.22 519.53 87.28 o
 5 -14 6 8.03 62.05 66.83 o
 6 -14 6 414.18 645.68 111.15 o
 -5 -13 6 1412.58 1244.32 85.92 o
 -4 -13 6 338.33 322.54 43.64 o
 -3 -13 6 1186.69 1096.35 76.37 o
 -2 -13 6 149.51 218.21 38.87 o
 -1 -13 6 438.04 441.80 51.14 o
 0 -13 6 325.70 289.12 46.37 o
 1 -13 6 742.15 679.10 72.28 o
 2 -13 6 3504.35 3296.61 188.88 o
 3 -13 6 1393.28 1383.42 113.88 o
 4 -13 6 405.90 409.07 81.83 o
 5 -13 6 73.36 120.01 73.64 o
 6 -13 6 27.02 204.57 85.92 o
 -9 -12 6 9.83 -49.10 62.05 o
 -5 -12 6 53.63 73.64 32.73 o
 -4 -12 6 912.32 917.08 67.51 o
 -3 -12 6 5930.08 5960.49 285.71 o
 -2 -12 6 1493.60 1516.39 97.51 o
 -1 -12 6 1394.90 1395.02 88.65 o
 0 -12 6 813.52 814.11 73.64 o
 1 -12 6 527.54 718.65 72.96 o
 2 -12 6 707.39 1013.91 92.74 o
 3 -12 6 399.59 467.71 77.05 o
 4 -12 6 181.29 222.98 64.78 o
 5 -12 6 176.85 300.03 81.15 o
 6 -12 6 104.07 32.73 74.33 o
 -9 -11 6 1.73 42.28 69.55 o
 -6 -11 6 656.98 636.14 63.42 o
 -5 -11 6 2150.47 1960.92 117.29 o
 -4 -11 6 930.06 917.08 68.87 o
 -3 -11 6 221.08 265.94 39.55 o
 -2 -11 6 2466.85 2269.13 123.42 o
 -1 -11 6 1441.97 1354.78 90.01 o
 0 -11 6 585.89 762.97 68.87 o
 1 -11 6 598.02 597.95 67.51 o
 2 -11 6 129.21 117.97 47.05 o
 3 -11 6 243.38 263.21 64.78 o
 4 -11 6 376.12 389.29 75.69 o
 5 -11 6 37.39 95.46 69.55 o
 6 -11 6 1.44 24.55 76.37 o
 -9 -10 6 46.09 40.23 66.83 o
 -6 -10 6 814.17 792.29 72.96 o
 -5 -10 6 627.33 698.19 63.42 o
 -4 -10 6 384.83 507.26 51.82 o
 -3 -10 6 1259.67 1167.26 78.42 o
 -2 -10 6 2742.08 2707.52 144.56 o
 -1 -10 6 755.57 793.65 64.10 o
 0 -10 6 499.31 485.44 55.92 o
 1 -10 6 502.39 445.89 56.60 o
 2 -10 6 959.91 1119.53 96.15 o
 3 -10 6 69.15 164.34 55.23 o
 4 -10 6 991.47 1165.22 117.29 o
 5 -10 6 996.35 963.45 110.47 o
 6 -10 6 114.29 190.25 74.33 o
 -9 -9 6 5.54 -14.32 60.01 o
 -7 -9 6 136.64 156.84 45.00 o
 -6 -9 6 207.51 205.93 42.28 o
 -5 -9 6 1132.37 1223.18 83.87 o
 -4 -9 6 1166.18 1024.57 46.48 o
 -3 -9 6 343.18 331.40 43.64 o
 -2 -9 6 1209.65 1342.51 85.92 o
 -1 -9 6 323.39 309.58 43.64 o
 0 -9 6 523.60 553.63 59.32 o
 1 -9 6 2047.72 1953.42 122.06 o
 2 -9 6 1153.56 1082.71 88.65 o
 3 -9 6 1307.92 1285.23 109.10 o
 4 -9 6 724.62 810.70 98.87 o
 5 -9 6 175.16 324.58 78.42 o
 6 -9 6 124.07 235.93 80.46 o
 -9 -8 6 82.97 53.87 68.19 o
 -7 -8 6 416.83 340.88 56.60 o
 -6 -8 6 1109.30 1067.03 79.10 o
 -5 -8 6 2141.33 1803.87 72.50 o
 -4 -8 6 2328.23 2438.73 89.54 o
 -3 -8 6 268.53 358.61 44.32 o
 -2 -8 6 1022.68 1048.61 73.64 o
 -1 -8 6 68.24 202.52 35.46 o
 0 -8 6 759.51 633.41 60.01 o
 1 -8 6 487.04 480.67 58.64 o
 2 -8 6 733.99 917.76 83.19 o
 3 -8 6 1160.36 1364.33 106.38 o
 4 -8 6 11.74 -29.32 48.41 o
 5 -8 6 48.76 115.92 64.78 o
 6 -8 6 50.03 210.70 79.10 o
 -9 -7 6 78.66 92.06 69.55 o
 -7 -7 6 322.69 382.47 57.96 o
 -6 -7 6 83.48 186.84 42.28 o
 -5 -7 6 354.59 394.32 32.22 o
 -4 -7 6 673.87 789.11 39.78 o
 -3 -7 6 658.84 645.18 35.69 o
 -2 -7 6 689.13 720.01 58.64 o
 -1 -7 6 386.60 430.89 47.05 o
 0 -7 6 182.42 240.71 40.23 o
 1 -7 6 865.69 848.21 72.28 o
 2 -7 6 48.85 38.19 35.46 o
 3 -7 6 54.16 76.37 43.64 o
 4 -7 6 121.57 132.97 54.55 o
 5 -7 6 233.69 295.26 70.92 o
 6 -7 6 67.90 51.14 70.92 o
 7 -7 6 125.22 127.51 85.24 o
 -9 -6 6 117.68 205.93 73.64 o
 -8 -6 6 75.04 80.46 46.37 o
 -7 -6 6 175.89 210.70 49.10 o
 -6 -6 6 302.19 379.20 74.63 o
 -5 -6 6 248.99 213.02 27.36 o
 -4 -6 6 1868.59 1990.45 77.03 o
 -3 -6 6 1129.97 1379.54 89.33 o
 -2 -6 6 269.33 334.13 42.28 o
 -1 -6 6 56.66 45.00 23.87 o
 0 -6 6 2457.57 2348.92 129.56 o
 1 -6 6 306.47 379.06 47.73 o
 2 -6 6 1684.81 1678.68 109.10 o
 3 -6 6 1500.36 1624.81 116.60 o
 4 -6 6 1231.75 1255.23 115.24 o
 5 -6 6 315.05 436.34 81.15 o
 6 -6 6 42.40 8.86 59.32 o
 7 -6 6 43.71 82.51 81.15 o
 -9 -5 6 389.29 329.35 83.87 o
 -8 -5 6 148.77 132.29 51.14 o
 -7 -5 6 169.17 210.70 49.10 o
 -6 -5 6 332.81 356.66 35.80 o
 -5 -5 6 400.41 418.55 47.73 o
 -4 -5 6 772.94 750.40 40.57 o
 -3 -5 6 22.44 27.12 16.87 o
 -2 -5 6 1505.83 1682.09 92.06 o
 -1 -5 6 728.18 637.67 30.35 o
 0 -5 6 2625.25 2749.80 146.61 o
 1 -5 6 67.65 100.92 34.78 o
 2 -5 6 710.61 747.29 74.33 o
 3 -5 6 1672.02 1751.58 118.65 o
 4 -5 6 477.97 554.31 72.96 o
 5 -5 6 366.79 389.29 79.10 o
 6 -5 6 138.65 218.89 78.42 o
 7 -5 6 112.98 55.23 81.83 o
 -9 -4 6 0.80 89.33 64.78 o
 -8 -4 6 155.17 126.83 50.46 o
 -7 -4 6 233.17 295.95 38.05 o
 -6 -4 6 2673.50 2498.94 113.84 o
 -5 -4 6 373.45 321.19 32.00 o
 -4 -4 6 821.79 815.14 43.32 o
 -3 -4 6 1561.43 1589.68 64.56 o
 -2 -4 6 466.16 384.91 31.24 o
 -1 -4 6 303.95 277.29 29.32 o
 0 -4 6 4879.33 5119.79 244.80 o
 1 -4 6 237.51 293.21 44.32 o
 2 -4 6 666.76 696.14 68.19 o
 3 -4 6 495.69 493.62 66.14 o
 4 -4 6 43.85 40.91 49.10 o
 5 -4 6 67.86 90.69 60.69 o
 6 -4 6 204.54 284.35 77.05 o
 7 -4 6 33.20 61.95 51.34 o
 -9 -3 6 429.81 438.39 75.01 o
 -8 -3 6 132.25 82.51 49.78 o
 -7 -3 6 380.43 338.27 40.16 o
 -6 -3 6 1910.00 1534.19 72.28 o
 -5 -3 6 1298.83 1347.69 63.34 o
 -4 -3 6 388.38 425.79 62.73 o
 -3 -3 6 123.80 192.10 76.37 o
 -2 -3 6 5860.73 5962.56 203.72 o
 -1 -3 6 1543.76 1393.03 53.25 o
 0 -3 6 1025.43 1056.83 46.78 o
 1 -3 6 1087.20 1172.72 82.51 o
 2 -3 6 774.92 935.49 77.74 o
 3 -3 6 394.04 446.57 61.37 o
 4 -3 6 988.99 1021.41 100.92 o
 5 -3 6 358.49 240.71 68.87 o
 6 -3 6 44.15 52.51 68.19 o
 7 -3 6 49.56 100.50 64.10 o
 -9 -2 6 97.08 62.05 57.28 o
 -8 -2 6 377.39 352.47 67.51 o
 -7 -2 6 68.29 54.66 68.53 o
 -6 -2 6 191.87 132.96 29.99 o
 -5 -2 6 54.69 69.55 32.05 o
 -4 -2 6 170.22 181.40 58.98 o
 -3 -2 6 1524.44 1408.50 60.50 o
 -2 -2 6 235.57 221.82 54.21 o
 -1 -2 6 1973.96 1774.99 91.34 o
 0 -2 6 1505.91 1531.36 79.78 o
 1 -2 6 3061.54 3552.46 207.98 o
 2 -2 6 2343.24 2447.72 138.42 o
 3 -2 6 949.27 1075.21 92.74 o
 4 -2 6 160.35 128.20 47.05 o
 5 -2 6 283.50 342.92 69.55 o
 6 -2 6 225.21 225.75 52.27 o
 7 -2 6 41.16 -9.54 49.49 o
 -9 -1 6 116.77 51.82 58.64 o
 -8 -1 6 308.96 302.54 44.58 o
 -7 -1 6 42.28 93.01 31.07 o
 -6 -1 6 835.18 848.38 55.35 o
 -5 -1 6 1309.51 1198.55 139.45 o
 -4 -1 6 3645.34 3456.76 127.52 o
 -3 -1 6 445.09 440.13 34.35 o
 -2 -1 6 1025.55 1158.12 56.60 o
 -1 -1 6 470.48 519.99 23.82 o
 0 -1 6 772.22 881.50 59.32 o
 1 -1 6 2896.13 3015.48 111.35 o
 2 -1 6 454.83 345.07 44.97 o
 3 -1 6 40.85 82.85 28.93 o
 4 -1 6 640.62 504.66 95.46 o
 5 -1 6 21.14 -8.99 36.56 o
 6 -1 6 10.82 -40.98 40.98 o
 7 -1 6 48.88 100.68 52.80 o
 -9 0 6 306.21 96.83 60.01 o
 -8 0 6 356.56 332.16 85.20 o
 -7 0 6 78.76 119.67 33.27 o
 -6 0 6 1077.29 1025.12 60.75 o
 -5 0 6 472.52 503.07 40.69 o
 -4 0 6 2372.78 1958.34 123.08 o
 -3 0 6 30.53 59.52 20.18 o
 -2 0 6 456.02 563.57 24.63 o
 -1 0 6 2558.42 2017.90 61.35 o
 0 0 6 106.85 87.96 39.55 o
 1 0 6 89.58 288.23 43.30 o
 2 0 6 183.19 291.31 33.41 o
 3 0 6 1487.80 1582.93 75.93 o
 4 0 6 147.90 284.72 41.33 o
 5 0 6 408.44 462.04 57.62 o
 6 0 6 160.96 110.92 46.97 o
 7 0 6 0.47 46.27 67.85 o
 -9 1 6 116.77 79.78 58.64 o
 -8 1 6 308.96 429.99 50.39 o
 -7 1 6 42.28 37.31 30.37 o
 -6 1 6 835.18 1027.74 62.97 o
 -5 1 6 1309.51 1198.11 60.82 o
 -4 1 6 3645.34 3603.17 129.93 o
 -3 1 6 445.09 476.83 35.92 o
 -2 1 6 1025.55 1205.61 40.33 o
 -1 1 6 470.48 484.27 24.62 o
 0 1 6 772.22 828.13 40.57 o
 1 1 6 2896.14 3075.20 111.60 o
 2 1 6 454.83 467.58 58.98 o
 3 1 6 40.85 43.31 26.50 o
 4 1 6 640.62 566.58 55.92 o
 5 1 6 21.14 39.04 36.64 o
 6 1 6 10.82 39.41 43.63 o
 7 1 6 48.88 -16.90 47.67 o
 -9 2 6 97.08 88.63 51.43 o
 -8 2 6 377.39 327.02 47.71 o
 -7 2 6 68.29 68.86 31.45 o
 -6 2 6 191.87 187.93 34.44 o
 -5 2 6 54.69 82.98 31.37 o
 -4 2 6 170.22 198.00 27.43 o
 -3 2 6 1524.44 1429.66 50.44 o
 -2 2 6 235.57 246.54 17.50 o
 -1 2 6 1973.96 1768.67 56.05 o
 0 2 6 1505.91 1513.13 61.58 o
 1 2 6 3061.54 3674.88 128.98 o
 2 2 6 2343.24 2421.84 96.18 o
 3 2 6 949.27 1012.73 80.09 o
 4 2 6 160.35 206.15 38.81 o
 5 2 6 283.50 346.47 51.08 o
 6 2 6 225.21 248.26 51.48 o
 7 2 6 41.16 84.53 52.32 o
 -9 3 6 429.81 410.14 65.33 o
 -8 3 6 132.25 169.63 35.16 o
 -7 3 6 380.43 314.72 42.62 o
 -6 3 6 1910.00 1512.22 85.24 o
 -5 3 6 1298.83 1379.14 67.26 o
 -4 3 6 388.38 351.92 34.41 o
 -3 3 6 123.80 141.74 21.36 o
 -2 3 6 5860.72 6104.62 165.28 o
 -1 3 6 1543.76 1418.82 47.68 o
 0 3 6 1025.43 1010.91 47.13 o
 1 3 6 1087.20 1262.13 57.14 o
 2 3 6 774.91 704.16 47.48 o
 3 3 6 394.04 646.83 48.07 o
 4 3 6 988.99 984.25 65.04 o
 5 3 6 358.49 393.39 50.73 o
 6 3 6 44.15 140.00 47.13 o
 7 3 6 49.56 -15.00 68.87 o
 -9 4 6 0.80 -6.59 42.30 o
 -8 4 6 155.17 121.63 32.62 o
 -7 4 6 233.17 184.19 31.32 o
 -6 4 6 2673.50 2443.06 109.41 o
 -5 4 6 373.46 369.22 73.35 o
 -4 4 6 821.80 797.44 50.70 o
 -3 4 6 1561.42 1533.83 76.25 o
 -2 4 6 466.16 479.15 28.00 o
 -1 4 6 303.95 286.43 20.78 o
 0 4 6 4879.33 4943.35 140.07 o
 1 4 6 237.51 266.77 28.45 o
 2 4 6 666.76 793.65 49.61 o
 3 4 6 495.69 518.96 44.46 o
 4 4 6 43.85 66.93 61.03 o
 5 4 6 67.86 182.77 52.85 o
 6 4 6 204.54 321.87 53.88 o
 7 4 6 33.20 60.69 72.28 o
 -9 5 6 389.29 382.88 102.93 o
 -8 5 6 148.77 92.49 33.16 o
 -7 5 6 169.17 158.78 30.78 o
 -6 5 6 332.81 363.82 33.30 o
 -5 5 6 400.41 415.14 31.09 o
 -4 5 6 772.94 697.89 30.25 o
 -3 5 6 22.44 34.61 18.28 o
 -2 5 6 1505.83 1478.40 50.98 o
 -1 5 6 728.18 700.52 50.56 o
 0 5 6 2625.26 2763.79 84.01 o
 1 5 6 67.65 141.41 23.38 o
 2 5 6 710.62 790.03 96.49 o
 3 5 6 1672.02 1691.17 79.20 o
 4 5 6 477.97 540.60 50.13 o
 5 5 6 366.79 384.17 48.73 o
 6 5 6 138.65 187.50 48.37 o
 7 5 6 112.98 42.28 75.69 o
 -9 6 6 117.68 60.62 89.33 o
 -8 6 6 75.04 47.82 49.04 o
 -7 6 6 175.89 207.66 31.90 o
 -6 6 6 302.19 320.34 32.39 o
 -5 6 6 248.99 219.94 25.16 o
 -4 6 6 1868.59 1982.27 57.87 o
 -3 6 6 1129.97 1310.69 48.88 o
 -2 6 6 269.33 353.18 24.05 o
 -1 6 6 56.66 66.46 15.18 o
 0 6 6 2457.57 2368.72 73.92 o
 1 6 6 306.47 382.47 32.52 o
 2 6 6 1684.82 1616.03 72.73 o
 3 6 6 1500.36 1647.19 77.41 o
 4 6 6 1231.75 1222.12 71.82 o
 5 6 6 315.05 384.72 48.63 o
 6 6 6 42.40 -17.05 58.64 o
 7 6 6 43.71 21.14 73.64 o
 -9 7 6 78.66 192.98 74.33 o
 -8 7 6 248.74 220.42 37.10 o
 -7 7 6 322.69 302.85 35.72 o
 -6 7 6 83.48 54.03 24.36 o
 -5 7 6 354.59 332.91 35.77 o
 -4 7 6 673.88 643.94 30.37 o
 -3 7 6 658.83 556.18 25.39 o
 -2 7 6 689.13 752.23 34.66 o
 -1 7 6 386.60 417.94 27.15 o
 0 7 6 182.42 220.64 21.39 o
 1 7 6 865.69 905.95 65.80 o
 2 7 6 48.85 59.59 29.66 o
 3 7 6 54.16 137.45 30.63 o
 4 7 6 121.57 179.43 34.72 o
 5 7 6 233.69 266.22 56.60 o
 6 7 6 67.90 23.87 64.10 o
 7 7 6 125.22 105.69 77.05 o
 -9 8 6 82.97 90.69 72.28 o
 -8 8 6 128.74 10.52 41.21 o
 -7 8 6 416.83 428.82 76.64 o
 -6 8 6 1109.29 943.27 50.59 o
 -5 8 6 2141.32 1788.13 65.96 o
 -4 8 6 2328.23 2428.17 67.56 o
 -3 8 6 268.53 334.05 33.94 o
 -2 8 6 1022.68 1157.63 67.80 o
 -1 8 6 68.24 154.03 22.68 o
 0 8 6 759.51 725.38 34.96 o
 1 8 6 487.04 516.46 38.49 o
 2 8 6 733.99 785.30 51.65 o
 3 8 6 1160.36 1224.59 66.02 o
 4 8 6 11.74 35.17 30.24 o
 5 8 6 48.76 85.92 62.73 o
 6 8 6 50.03 59.32 68.87 o
 -9 9 6 5.54 -62.05 62.05 o
 -8 9 6 97.79 96.15 41.47 o
 -7 9 6 136.64 133.56 31.61 o
 -6 9 6 207.51 197.11 40.19 o
 -5 9 6 1132.37 1247.08 47.06 o
 -4 9 6 1166.18 1049.01 37.63 o
 -3 9 6 343.18 329.60 22.91 o
 -2 9 6 1209.66 1397.22 40.93 o
 -1 9 6 323.39 336.18 44.33 o
 0 9 6 523.60 610.18 33.94 o
 1 9 6 2047.73 2085.77 106.38 o
 2 9 6 1153.57 1248.15 65.12 o
 3 9 6 1307.92 1397.92 69.71 o
 4 9 6 724.62 838.74 61.71 o
 5 9 6 175.16 22.50 59.32 o
 6 9 6 124.07 225.02 77.05 o
 -9 10 6 46.09 51.82 72.28 o
 -8 10 6 176.01 209.51 50.25 o
 -7 10 6 143.78 93.34 31.48 o
 -6 10 6 814.16 810.22 48.42 o
 -5 10 6 627.33 593.16 33.87 o
 -4 10 6 384.83 392.77 24.69 o
 -3 10 6 1259.67 1253.88 39.28 o
 -2 10 6 2742.07 2763.07 71.95 o
 -1 10 6 755.57 777.05 69.05 o
 0 10 6 499.31 454.29 30.75 o
 1 10 6 502.39 577.31 34.81 o
 2 10 6 959.91 1082.15 59.47 o
 3 10 6 69.15 108.12 32.05 o
 4 10 6 991.48 1012.82 66.52 o
 5 10 6 996.35 946.40 110.47 o
 6 10 6 114.29 168.43 75.69 o
 -9 11 6 1.73 8.18 71.60 o
 -8 11 6 58.63 64.80 47.45 o
 -7 11 6 69.01 38.22 40.95 o
 -6 11 6 656.98 594.16 43.80 o
 -5 11 6 2150.48 2081.88 64.51 o
 -4 11 6 930.05 968.64 64.94 o
 -3 11 6 221.08 253.59 17.91 o
 -2 11 6 2466.83 2225.76 61.19 o
 -1 11 6 1441.98 1428.13 43.85 o
 0 11 6 585.89 740.92 39.77 o
 1 11 6 598.02 614.46 36.45 o
 2 11 6 129.21 233.82 30.97 o
 3 11 6 243.38 274.48 36.00 o
 4 11 6 376.12 206.61 68.19 o
 5 11 6 37.39 93.42 64.78 o
 6 11 6 1.44 -4.09 66.83 o
 -9 12 6 9.83 109.78 78.42 o
 -8 12 6 57.41 -45.29 51.48 o
 -7 12 6 267.10 208.18 47.45 o
 -6 12 6 98.50 149.92 29.73 o
 -5 12 6 53.63 85.41 21.22 o
 -4 12 6 912.33 886.10 53.44 o
 -3 12 6 5930.08 5962.61 144.72 o
 -2 12 6 1493.60 1689.77 49.25 o
 -1 12 6 1394.90 1308.43 42.40 o
 0 12 6 813.52 772.03 48.33 o
 1 12 6 527.54 790.19 40.97 o
 2 12 6 707.39 821.27 80.12 o
 3 12 6 399.59 501.28 95.12 o
 4 12 6 181.29 230.48 67.51 o
 5 12 6 176.85 80.46 69.55 o
 6 12 6 104.07 95.46 77.74 o
 -8 13 6 45.43 19.14 47.89 o
 -7 13 6 91.05 50.37 41.66 o
 -6 13 6 514.91 559.28 88.65 o
 -5 13 6 1412.58 1424.61 52.71 o
 -4 13 6 338.33 334.16 24.93 o
 -3 13 6 1186.68 1159.83 43.21 o
 -2 13 6 149.51 231.43 25.51 o
 -1 13 6 438.04 448.76 33.76 o
 0 13 6 325.70 353.04 28.78 o
 1 13 6 742.15 693.90 39.63 o
 2 13 6 3504.36 3412.01 127.80 o
 3 13 6 1393.28 1512.06 87.96 o
 4 13 6 405.90 397.48 74.33 o
 5 13 6 73.36 -53.87 62.05 o
 6 13 6 27.02 -6.82 69.55 o
 -8 14 6 40.99 13.33 48.73 o
 -7 14 6 14.44 14.77 42.67 o
 -6 14 6 48.15 162.68 45.55 o
 -5 14 6 285.42 291.67 29.81 o
 -4 14 6 110.33 182.13 29.80 o
 -3 14 6 277.04 378.71 28.03 o
 -2 14 6 1785.43 1555.35 47.81 o
 -1 14 6 1002.73 1059.19 39.09 o
 0 14 6 83.25 156.49 19.23 o
 1 14 6 1023.05 1072.61 50.12 o
 2 14 6 167.01 199.04 30.97 o
 3 14 6 133.43 268.67 66.14 o
 4 14 6 373.22 454.75 77.74 o
 5 14 6 8.03 150.70 68.19 o
 6 14 6 414.18 513.40 103.65 o
 -8 15 6 22.99 -23.12 47.01 o
 -7 15 6 135.45 173.74 56.94 o
 -6 15 6 540.04 459.89 50.71 o
 -5 15 6 563.82 646.90 52.85 o
 -4 15 6 729.95 686.98 36.06 o
 -3 15 6 491.35 453.94 27.04 o
 -2 15 6 947.46 1018.75 38.38 o
 -1 15 6 48.78 77.77 23.13 o
 0 15 6 210.75 195.59 21.12 o
 1 15 6 831.92 826.19 63.12 o
 2 15 6 290.59 287.78 33.93 o
 3 15 6 15.41 58.64 49.78 o
 4 15 6 591.99 574.77 85.24 o
 5 15 6 85.23 87.28 64.78 o
 6 15 6 18.15 30.00 70.23 o
 -8 16 6 93.09 -23.18 75.69 o
 -7 16 6 152.63 74.74 48.19 o
 -6 16 6 348.15 327.08 42.61 o
 -5 16 6 627.70 622.12 49.67 o
 -4 16 6 596.18 760.77 38.98 o
 -3 16 6 531.46 589.71 31.79 o
 -2 16 6 1106.83 1009.74 39.55 o
 -1 16 6 317.79 366.22 25.08 o
 0 16 6 245.05 285.94 24.74 o
 1 16 6 1766.26 1690.13 64.64 o
 2 16 6 224.53 150.70 52.51 o
 3 16 6 428.01 381.11 73.64 o
 4 16 6 79.64 66.83 62.73 o
 5 16 6 15.69 14.32 66.14 o
 6 16 6 88.13 157.52 79.78 o
 -8 17 6 42.54 113.88 84.55 o
 -7 17 6 30.39 44.21 45.80 o
 -6 17 6 2.34 -32.15 32.15 o
 -5 17 6 68.42 89.10 30.72 o
 -4 17 6 236.10 215.87 27.16 o
 -3 17 6 250.51 274.58 24.48 o
 -2 17 6 3562.44 3405.18 90.47 o
 -1 17 6 156.06 207.24 27.07 o
 0 17 6 193.70 238.49 31.63 o
 1 17 6 1952.37 2013.59 72.93 o
 2 17 6 128.86 184.11 53.87 o
 3 17 6 96.47 6.82 49.78 o
 4 17 6 127.18 127.51 63.42 o
 5 17 6 90.88 182.07 79.78 o
 -8 18 6 58.56 145.93 92.74 o
 -7 18 6 68.03 96.95 55.29 o
 -6 18 6 193.52 213.03 40.22 o
 -5 18 6 518.14 501.67 47.48 o
 -4 18 6 288.85 388.77 40.66 o
 -3 18 6 47.03 99.01 20.65 o
 -2 18 6 276.31 325.16 25.81 o
 -1 18 6 64.13 102.30 20.45 o
 0 18 6 1067.30 1022.80 43.19 o
 1 18 6 63.58 52.25 23.37 o
 2 18 6 984.74 1110.67 109.10 o
 3 18 6 78.52 40.23 49.10 o
 4 18 6 101.16 171.16 68.19 o
 5 18 6 83.31 128.88 70.92 o
 -7 19 6 130.56 293.21 74.97 o
 -6 19 6 37.46 54.20 43.79 o
 -5 19 6 902.71 763.54 56.12 o
 -4 19 6 403.16 344.31 38.69 o
 -3 19 6 331.00 299.42 29.91 o
 -2 19 6 1465.06 1477.46 51.80 o
 -1 19 6 15.80 -3.33 18.35 o
 0 19 6 378.20 498.51 31.67 o
 1 19 6 54.90 59.45 26.84 o
 2 19 6 9.72 13.64 48.41 o
 3 19 6 56.08 64.10 57.96 o
 4 19 6 26.98 -42.28 51.14 o
 5 19 6 52.80 67.51 68.19 o
 -7 20 6 193.61 253.40 101.91 o
 -6 20 6 277.53 368.85 50.60 o
 -5 20 6 211.34 139.65 37.42 o
 -4 20 6 490.99 463.18 61.78 o
 -3 20 6 564.50 564.76 36.97 o
 -2 20 6 900.84 909.73 42.14 o
 -1 20 6 93.96 82.40 25.56 o
 0 20 6 440.45 535.48 49.42 o
 1 20 6 43.91 90.59 27.52 o
 2 20 6 230.49 252.30 66.83 o
 3 20 6 344.15 300.03 70.23 o
 4 20 6 86.79 64.78 64.78 o
 5 20 6 9.55 1.36 62.73 o
 -7 21 6 6.31 49.78 90.01 o
 -6 21 6 393.70 338.94 48.43 o
 -5 21 6 100.75 82.91 37.07 o
 -4 21 6 22.71 84.91 32.71 o
 -3 21 6 72.06 124.94 32.09 o
 -2 21 6 134.07 165.12 24.75 o
 -1 21 6 281.27 254.36 27.18 o
 0 21 6 380.52 477.79 40.23 o
 1 21 6 351.98 349.26 37.64 o
 2 21 6 205.57 320.49 68.19 o
 3 21 6 59.27 -5.46 56.60 o
 4 21 6 17.74 -28.64 57.28 o
 5 21 6 64.97 -53.87 65.46 o
 -7 22 6 21.31 42.56 55.12 o
 -6 22 6 207.15 79.85 42.62 o
 -5 22 6 42.87 66.68 34.96 o
 -4 22 6 342.31 244.90 45.30 o
 -3 22 6 285.13 211.23 36.54 o
 -2 22 6 244.21 229.42 37.01 o
 -1 22 6 123.52 103.48 23.20 o
 0 22 6 169.29 176.46 31.04 o
 1 22 6 30.35 23.62 30.48 o
 2 22 6 31.68 91.37 55.23 o
 3 22 6 234.01 327.31 76.37 o
 4 22 6 11.79 5.46 59.32 o
 -6 23 6 38.93 46.19 42.26 o
 -5 23 6 114.28 113.98 38.78 o
 -4 23 6 65.11 105.12 36.80 o
 -3 23 6 95.44 216.11 67.15 o
 -2 23 6 71.19 146.84 32.28 o
 -1 23 6 51.86 67.26 29.63 o
 0 23 6 46.12 45.30 29.00 o
 1 23 6 1149.79 1229.26 65.58 o
 2 23 6 145.11 107.74 59.32 o
 3 23 6 40.50 77.74 66.14 o
 4 23 6 2.52 -49.78 62.05 o
 -6 24 6 25.05 96.37 53.54 o
 -5 24 6 27.35 38.74 38.15 o
 -4 24 6 128.02 92.54 36.77 o
 -3 24 6 408.01 317.09 42.35 o
 -2 24 6 24.32 20.67 39.49 o
 -1 24 6 121.87 208.54 34.96 o
 0 24 6 382.29 407.21 50.98 o
 1 24 6 13.41 47.35 31.20 o
 2 24 6 6.84 20.46 57.96 o
 3 24 6 157.96 118.65 71.60 o
 4 24 6 67.59 112.51 79.10 o
 -6 25 6 2.34 11.30 52.47 o
 -5 25 6 92.71 59.78 52.61 o
 -4 25 6 246.84 182.04 40.20 o
 -3 25 6 109.68 95.75 34.42 o
 -2 25 6 147.55 152.35 35.02 o
 -1 25 6 1.75 32.02 29.57 o
 0 25 6 10.86 30.18 29.64 o
 1 25 6 385.87 443.87 45.11 o
 2 25 6 72.68 78.42 62.05 o
 3 25 6 27.93 -13.64 60.01 o
 -5 26 6 104.04 71.68 53.86 o
 -4 26 6 149.48 76.41 38.50 o
 -3 26 6 167.79 189.99 39.20 o
 -2 26 6 142.27 128.37 51.48 o
 -1 26 6 85.75 85.13 52.16 o
 0 26 6 66.23 116.29 34.86 o
 1 26 6 96.44 73.53 33.93 o
 2 26 6 65.13 72.96 65.46 o
 3 26 6 8.70 -20.46 66.83 o
 -5 27 6 193.68 164.57 59.64 o
 -4 27 6 3.09 -32.65 52.74 o
 -3 27 6 56.92 7.38 35.73 o
 -2 27 6 176.24 192.36 51.16 o
 -1 27 6 10.62 25.25 40.79 o
 0 27 6 46.66 61.32 34.56 o
 1 27 6 22.58 39.64 59.97 o
 2 27 6 85.50 87.28 62.05 o
 3 27 6 84.67 127.51 73.64 o
 -4 28 6 8.35 105.18 54.72 o
 -3 28 6 33.19 33.80 38.96 o
 -2 28 6 21.64 53.64 46.04 o
 -1 28 6 22.76 4.14 41.65 o
 0 28 6 98.33 179.60 50.18 o
 1 28 6 163.97 196.27 42.12 o
 2 28 6 29.90 43.94 45.55 o
 -4 29 6 21.56 15.41 54.26 o
 -3 29 6 45.08 31.60 50.97 o
 -2 29 6 37.31 6.50 67.85 o
 -1 29 6 19.91 38.95 64.44 o
 0 29 6 19.39 65.73 51.82 o
 1 29 6 39.88 43.52 39.11 o
 -3 30 6 0.98 -48.82 48.82 o
 -2 30 6 0.22 -73.99 73.99 o
 -1 30 6 39.71 -3.17 61.37 o
 0 30 6 26.47 103.19 51.15 o
 1 30 6 10.10 56.60 66.14 o
 -2 31 6 32.75 35.43 52.45 o
 -1 31 6 31.61 27.45 50.25 o
 1 -28 7 58.11 79.10 67.51 o
 0 -27 7 83.35 18.41 55.23 o
 1 -27 7 85.32 40.91 66.14 o
 2 -27 7 72.78 85.92 73.64 o
 0 -26 7 169.07 148.65 62.05 o
 1 -26 7 30.92 -56.60 56.60 o
 2 -26 7 12.45 47.05 71.60 o
 -1 -25 7 110.05 128.88 57.96 o
 0 -25 7 224.33 227.07 65.46 o
 1 -25 7 308.98 246.16 72.96 o
 2 -25 7 71.14 98.19 73.64 o
 3 -25 7 95.72 94.10 83.19 o
 -1 -24 7 16.27 -16.37 47.73 o
 0 -24 7 355.12 429.52 72.96 o
 1 -24 7 136.44 91.37 64.10 o
 2 -24 7 7.64 63.42 64.78 o
 3 -24 7 33.49 -67.51 68.19 o
 -1 -23 7 368.64 505.90 71.60 o
 0 -23 7 203.12 127.51 55.92 o
 1 -23 7 93.62 76.37 57.28 o
 2 -23 7 253.33 265.94 79.10 o
 3 -23 7 4.57 -21.14 69.55 o
 -2 -22 7 74.32 105.01 47.05 o
 -1 -22 7 46.46 110.47 48.41 o
 0 -22 7 42.80 52.51 47.73 o
 1 -22 7 25.52 50.46 54.55 o
 2 -22 7 1.29 51.82 59.32 o
 3 -22 7 110.59 143.20 75.01 o
 4 -22 7 123.81 -35.46 77.74 o
 -2 -21 7 29.56 43.64 40.23 o
 -1 -21 7 99.22 158.20 51.82 o
 0 -21 7 63.54 0.00 47.05 o
 1 -21 7 281.76 272.08 70.92 o
 2 -21 7 241.80 194.34 71.60 o
 3 -21 7 23.69 -15.68 66.83 o
 4 -21 7 29.88 32.05 77.05 o
 -3 -20 7 25.06 94.10 40.91 o
 -2 -20 7 73.22 147.97 47.05 o
 -1 -20 7 172.43 61.37 44.32 o
 0 -20 7 11.50 -14.32 42.96 o
 1 -20 7 887.85 940.26 99.56 o
 2 -20 7 67.63 55.23 62.05 o
 3 -20 7 320.39 282.99 75.69 o
 4 -20 7 210.87 205.93 79.10 o
 -3 -19 7 377.89 398.16 54.55 o
 -2 -19 7 486.09 707.05 72.96 o
 -1 -19 7 48.39 47.73 44.32 o
 0 -19 7 66.32 162.29 53.19 o
 1 -19 7 156.23 97.51 55.92 o
 2 -19 7 17.05 111.83 60.01 o
 3 -19 7 297.63 359.29 77.05 o
 4 -19 7 91.08 163.65 79.10 o
 -3 -18 7 74.13 38.87 34.78 o
 -2 -18 7 104.70 218.21 47.73 o
 -1 -18 7 24.18 58.64 41.60 o
 0 -18 7 537.03 503.17 69.55 o
 1 -18 7 848.06 1144.76 106.38 o
 2 -18 7 87.25 114.56 57.96 o
 3 -18 7 114.05 25.23 54.55 o
 4 -18 7 30.60 135.70 75.69 o
 5 -18 7 2.15 44.32 81.15 o
 -4 -17 7 271.79 386.56 51.82 o
 -3 -17 7 123.84 147.97 40.23 o
 -2 -17 7 561.01 655.91 71.60 o
 -1 -17 7 635.46 666.82 72.96 o
 0 -17 7 117.21 115.24 47.73 o
 1 -17 7 319.12 270.03 63.42 o
 2 -17 7 378.77 392.70 75.01 o
 3 -17 7 183.98 252.30 67.51 o
 4 -17 7 372.09 250.25 85.24 o
 5 -17 7 145.92 66.14 83.19 o
 -4 -16 7 210.65 174.56 41.60 o
 -3 -16 7 468.76 563.17 63.42 o
 -2 -16 7 166.55 265.94 51.14 o
 -1 -16 7 378.68 522.94 62.05 o
 0 -16 7 2693.07 2805.72 160.93 o
 1 -16 7 381.29 255.03 55.23 o
 2 -16 7 466.72 370.88 71.60 o
 3 -16 7 41.35 112.51 57.96 o
 4 -16 7 299.57 285.71 77.74 o
 5 -16 7 35.55 40.23 79.10 o
 -4 -15 7 163.78 204.57 42.96 o
 -3 -15 7 23.84 32.05 32.73 o
 -2 -15 7 1085.12 1062.93 82.51 o
 -1 -15 7 454.61 398.16 56.60 o
 0 -15 7 648.46 610.23 71.60 o
 1 -15 7 175.52 235.25 59.32 o
 2 -15 7 599.14 479.98 73.64 o
 3 -15 7 373.40 408.39 80.46 o
 4 -15 7 80.08 100.92 63.42 o
 5 -15 7 16.87 -30.00 72.28 o
 -5 -14 7 62.41 66.14 36.14 o
 -4 -14 7 100.89 162.97 39.55 o
 -3 -14 7 655.43 741.15 70.23 o
 -2 -14 7 929.56 950.49 77.74 o
 -1 -14 7 468.50 477.26 59.32 o
 0 -14 7 446.01 612.27 68.87 o
 1 -14 7 148.64 94.78 46.37 o
 2 -14 7 441.49 394.75 71.60 o
 3 -14 7 470.24 412.48 73.64 o
 4 -14 7 247.85 240.71 77.74 o
 5 -14 7 95.37 105.69 70.23 o
 -5 -13 7 136.96 146.61 40.23 o
 -4 -13 7 58.81 138.42 37.50 o
 -3 -13 7 233.22 227.07 44.32 o
 -2 -13 7 28.32 122.74 38.19 o
 -1 -13 7 353.98 325.26 53.19 o
 0 -13 7 545.29 542.72 66.14 o
 1 -13 7 248.59 315.72 55.23 o
 2 -13 7 1614.51 1512.30 117.29 o
 3 -13 7 116.77 57.96 57.28 o
 4 -13 7 68.95 -0.68 55.92 o
 5 -13 7 41.02 104.33 78.42 o
 -6 -12 7 10.19 33.41 35.46 o
 -5 -12 7 266.67 206.61 44.32 o
 -4 -12 7 107.09 192.29 40.23 o
 -3 -12 7 82.05 107.06 35.46 o
 -2 -12 7 527.22 505.90 58.64 o
 -1 -12 7 3397.55 2848.67 165.02 o
 0 -12 7 548.08 512.03 61.37 o
 1 -12 7 399.17 335.49 55.23 o
 2 -12 7 736.73 622.50 78.42 o
 3 -12 7 61.93 23.87 47.73 o
 4 -12 7 108.81 187.52 75.01 o
 5 -12 7 9.40 -6.14 66.14 o
 6 -12 7 90.22 11.59 78.42 o
 -6 -11 7 94.00 214.11 47.73 o
 -5 -11 7 143.88 126.15 38.87 o
 -4 -11 7 483.18 595.22 60.69 o
 -3 -11 7 68.12 49.78 32.05 o
 -2 -11 7 125.81 208.66 40.91 o
 -1 -11 7 148.14 195.02 43.64 o
 0 -11 7 1224.69 1167.26 87.28 o
 1 -11 7 3329.08 2932.55 171.84 o
 2 -11 7 352.82 237.98 53.87 o
 3 -11 7 98.86 125.47 51.14 o
 4 -11 7 32.96 30.00 57.28 o
 5 -11 7 6.43 -53.19 68.19 o
 6 -11 7 37.53 75.69 82.51 o
 -6 -10 7 148.00 171.16 45.69 o
 -5 -10 7 1237.58 1192.49 88.65 o
 -4 -10 7 87.72 165.02 38.87 o
 -3 -10 7 590.13 692.73 66.14 o
 -2 -10 7 3049.16 2787.30 154.11 o
 -1 -10 7 556.93 583.63 62.73 o
 0 -10 7 294.14 398.16 52.51 o
 1 -10 7 882.64 737.74 76.37 o
 2 -10 7 183.15 265.26 55.92 o
 3 -10 7 997.19 798.43 90.69 o
 4 -10 7 223.37 179.34 62.05 o
 5 -10 7 38.09 28.64 69.55 o
 6 -10 7 11.91 -10.23 74.33 o
 -7 -9 7 70.36 82.51 45.00 o
 -6 -9 7 7.69 44.32 37.50 o
 -5 -9 7 895.07 920.49 83.19 o
 -4 -9 7 975.50 1061.57 77.74 o
 -3 -9 7 438.59 463.62 55.92 o
 -2 -9 7 1066.82 1120.21 81.15 o
 -1 -9 7 1078.72 1190.45 81.83 o
 0 -9 7 1146.15 1194.54 82.51 o
 1 -9 7 923.07 700.92 75.01 o
 2 -9 7 1164.34 1178.86 97.51 o
 3 -9 7 287.15 240.03 56.60 o
 4 -9 7 125.48 102.28 55.23 o
 5 -9 7 94.48 167.06 70.92 o
 6 -9 7 71.25 -23.18 65.46 o
 -7 -8 7 5.22 43.64 41.60 o
 -6 -8 7 250.46 359.29 55.92 o
 -5 -8 7 1316.09 1172.04 88.65 o
 -4 -8 7 229.95 252.76 34.78 o
 -3 -8 7 773.77 805.25 69.55 o
 -2 -8 7 1229.61 1180.90 84.55 o
 -1 -8 7 243.00 330.04 46.37 o
 0 -8 7 1147.11 1037.70 80.46 o
 1 -8 7 1901.34 1740.67 112.51 o
 2 -8 7 1030.30 773.20 80.46 o
 3 -8 7 259.62 299.35 61.37 o
 4 -8 7 304.58 361.33 73.64 o
 5 -8 7 29.83 64.78 66.14 o
 6 -8 7 29.98 60.01 63.42 o
 -8 -7 7 709.05 838.66 90.01 o
 -7 -7 7 2.82 62.73 42.28 o
 -6 -7 7 513.26 678.41 73.64 o
 -5 -7 7 996.12 949.73 51.26 o
 -4 -7 7 1138.78 1112.33 53.29 o
 -3 -7 7 1079.31 1114.08 79.78 o
 -2 -7 7 4219.14 3919.11 203.89 o
 -1 -7 7 3311.50 3307.52 167.75 o
 0 -7 7 196.33 145.93 40.23 o
 1 -7 7 183.59 195.02 42.96 o
 2 -7 7 697.74 529.08 66.83 o
 3 -7 7 413.64 289.80 57.96 o
 4 -7 7 72.18 109.10 60.01 o
 5 -7 7 154.31 214.80 75.01 o
 6 -7 7 175.73 156.84 76.37 o
 -8 -6 7 523.19 672.28 83.19 o
 -7 -6 7 35.24 63.42 42.96 o
 -6 -6 7 1160.06 1186.36 100.92 o
 -5 -6 7 117.62 107.95 24.58 o
 -4 -6 7 337.09 364.42 33.10 o
 -3 -6 7 318.85 415.63 34.44 o
 -2 -6 7 264.86 370.20 47.73 o
 -1 -6 7 727.94 749.29 98.53 o
 0 -6 7 583.46 567.27 59.32 o
 1 -6 7 1290.03 1079.30 84.55 o
 2 -6 7 204.02 91.37 42.28 o
 3 -6 7 465.30 424.75 69.55 o
 4 -6 7 78.36 124.79 52.51 o
 5 -6 7 12.76 0.68 58.64 o
 6 -6 7 40.06 152.74 77.05 o
 -8 -5 7 88.38 214.80 55.92 o
 -7 -5 7 137.28 212.75 54.55 o
 -6 -5 7 652.51 846.07 59.32 o
 -5 -5 7 102.59 166.37 27.57 o
 -4 -5 7 2755.53 2781.58 106.73 o
 -3 -5 7 1415.00 1594.59 76.03 o
 -2 -5 7 849.48 931.40 67.51 o
 -1 -5 7 1226.29 1120.77 71.60 o
 0 -5 7 105.65 100.24 36.14 o
 1 -5 7 987.32 1167.95 82.51 o
 2 -5 7 720.58 616.36 68.19 o
 3 -5 7 445.12 397.48 68.19 o
 4 -5 7 166.45 114.56 55.23 o
 5 -5 7 231.03 340.26 77.74 o
 6 -5 7 5.36 13.64 68.87 o
 -9 -4 7 66.22 77.74 58.64 o
 -8 -4 7 100.64 70.92 53.19 o
 -7 -4 7 17.36 -6.82 40.23 o
 -6 -4 7 2284.90 2120.61 92.22 o
 -5 -4 7 2374.44 2328.27 106.34 o
 -4 -4 7 2014.18 2068.04 83.79 o
 -3 -4 7 136.44 216.63 40.91 o
 -2 -4 7 3670.88 3761.33 132.59 o
 -1 -4 7 1153.37 1180.75 85.92 o
 0 -4 7 2047.03 2251.80 84.45 o
 1 -4 7 677.51 705.69 70.23 o
 2 -4 7 73.32 168.43 46.37 o
 3 -4 7 484.01 511.35 70.23 o
 4 -4 7 93.29 151.38 57.28 o
 5 -4 7 18.91 102.28 58.64 o
 6 -4 7 29.62 23.64 47.07 o
 -9 -3 7 26.43 76.37 58.64 o
 -8 -3 7 116.28 122.74 56.60 o
 -7 -3 7 318.20 395.86 87.93 o
 -6 -3 7 444.75 529.73 52.16 o
 -5 -3 7 126.91 164.34 28.81 o
 -4 -3 7 1799.42 1820.05 79.52 o
 -3 -3 7 371.64 480.53 36.34 o
 -2 -3 7 3313.39 3456.72 124.64 o
 -1 -3 7 2584.78 2435.09 104.30 o
 0 -3 7 869.68 847.09 43.73 o
 1 -3 7 604.19 534.43 50.46 o
 2 -3 7 557.40 423.39 58.64 o
 3 -3 7 211.41 332.76 60.69 o
 4 -3 7 212.49 287.08 64.78 o
 5 -3 7 39.50 52.55 40.26 o
 6 -3 7 20.32 38.50 46.05 o
 -9 -2 7 198.53 154.79 65.46 o
 -8 -2 7 4.04 -2.05 48.41 o
 -7 -2 7 23.49 25.17 68.19 o
 -6 -2 7 761.92 869.87 60.13 o
 -5 -2 7 81.06 134.08 27.77 o
 -4 -2 7 800.02 836.41 67.17 o
 -3 -2 7 917.50 816.86 47.13 o
 -2 -2 7 1248.80 1090.83 53.01 o
 -1 -2 7 417.43 620.29 41.60 o
 0 -2 7 1587.38 1542.20 63.69 o
 1 -2 7 153.42 222.19 28.25 o
 2 -2 7 33.08 160.39 48.07 o
 3 -2 7 471.13 459.32 65.46 o
 4 -2 7 1075.49 846.56 65.53 o
 5 -2 7 21.25 -9.35 37.37 o
 6 -2 7 176.77 220.94 54.00 o
 -9 -1 7 22.10 -12.96 55.23 o
 -8 -1 7 105.42 31.37 52.51 o
 -7 -1 7 260.96 191.29 38.91 o
 -6 -1 7 1163.21 1115.06 66.23 o
 -5 -1 7 4779.41 4367.91 162.47 o
 -4 -1 7 231.63 347.09 34.40 o
 -3 -1 7 350.79 507.52 38.79 o
 -2 -1 7 509.37 786.28 82.85 o
 -1 -1 7 479.63 561.01 30.64 o
 0 -1 7 1662.30 1657.65 82.82 o
 1 -1 7 115.52 127.05 24.17 o
 2 -1 7 560.81 556.26 44.99 o
 3 -1 7 373.01 296.02 38.28 o
 4 -1 7 756.19 757.82 61.71 o
 5 -1 7 14.85 -7.02 39.24 o
 6 -1 7 117.60 140.52 137.74 o
 -9 0 7 188.89 210.70 68.19 o
 -8 0 7 9.12 19.46 55.92 o
 -7 0 7 711.12 893.84 65.46 o
 -6 0 7 20.86 35.46 41.25 o
 -5 0 7 48.10 101.00 27.16 o
 -4 0 7 85.88 121.03 28.30 o
 -3 0 7 5798.32 5691.58 196.97 o
 -2 0 7 1846.38 1678.03 53.49 o
 -1 0 7 2654.15 2794.83 82.87 o
 0 0 7 182.67 186.96 27.28 o
 1 0 7 205.58 262.88 30.09 o
 2 0 7 105.73 253.09 32.54 o
 3 0 7 137.30 136.86 33.20 o
 4 0 7 286.01 274.29 43.36 o
 5 0 7 105.74 116.90 43.85 o
 6 0 7 104.73 135.77 51.53 o
 -9 1 7 22.10 -27.96 55.23 o
 -8 1 7 105.42 137.40 40.50 o
 -7 1 7 260.96 208.31 39.19 o
 -6 1 7 1163.21 1397.63 73.95 o
 -5 1 7 4779.41 4637.38 164.87 o
 -4 1 7 231.63 296.66 34.27 o
 -3 1 7 350.79 474.71 38.79 o
 -2 1 7 509.37 790.89 31.40 o
 -1 1 7 479.63 560.25 30.33 o
 0 1 7 1662.29 1506.64 64.96 o
 1 1 7 115.52 143.73 38.19 o
 2 1 7 560.81 610.30 58.98 o
 3 1 7 373.01 354.24 40.69 o
 4 1 7 756.19 680.95 66.83 o
 5 1 7 14.85 1.20 37.25 o
 6 1 7 117.60 169.96 98.19 o
 -9 2 7 198.53 351.11 79.78 o
 -8 2 7 4.04 30.11 36.88 o
 -7 2 7 23.49 73.36 35.11 o
 -6 2 7 761.92 942.00 158.16 o
 -5 2 7 81.06 71.04 28.81 o
 -4 2 7 800.02 914.02 97.51 o
 -3 2 7 917.50 878.44 36.01 o
 -2 2 7 1248.80 1020.83 58.19 o
 -1 2 7 417.43 619.61 30.40 o
 0 2 7 1587.38 1464.31 80.46 o
 1 2 7 153.42 202.36 39.55 o
 2 2 7 33.08 124.78 29.17 o
 3 2 7 471.13 400.65 43.59 o
 4 2 7 1075.49 904.14 77.74 o
 5 2 7 21.25 -19.45 36.56 o
 6 2 7 176.77 189.68 84.90 o
 -9 3 7 26.43 40.21 42.28 o
 -8 3 7 116.28 109.75 52.16 o
 -7 3 7 318.20 402.11 50.83 o
 -6 3 7 444.75 411.18 93.73 o
 -5 3 7 126.91 164.50 31.72 o
 -4 3 7 1799.42 2030.33 64.32 o
 -3 3 7 371.65 422.22 28.72 o
 -2 3 7 3313.39 3377.13 99.44 o
 -1 3 7 2584.78 2511.73 76.41 o
 0 3 7 869.68 845.31 49.78 o
 1 3 7 604.19 558.19 39.99 o
 2 3 7 557.40 509.61 55.23 o
 3 3 7 211.41 284.28 39.40 o
 4 3 7 212.49 200.63 40.29 o
 5 3 7 39.50 19.94 41.60 o
 6 3 7 20.32 39.30 48.07 o
 -9 4 7 66.22 36.14 46.71 o
 -8 4 7 100.63 166.05 43.96 o
 -7 4 7 17.36 24.64 32.75 o
 -6 4 7 2284.90 2148.39 75.83 o
 -5 4 7 2374.44 2278.74 111.38 o
 -4 4 7 2014.19 2062.44 57.53 o
 -3 4 7 136.44 264.60 21.99 o
 -2 4 7 3670.87 3610.39 106.36 o
 -1 4 7 1153.37 1134.91 42.98 o
 0 4 7 2047.03 2130.30 85.08 o
 1 4 7 677.51 587.74 42.19 o
 2 4 7 73.32 111.73 27.72 o
 3 4 7 484.01 413.64 93.04 o
 4 4 7 93.29 55.05 34.35 o
 5 4 7 18.91 74.69 39.90 o
 6 4 7 29.62 -14.95 43.40 o
 -9 5 7 123.25 156.98 122.74 o
 -8 5 7 88.38 82.95 44.66 o
 -7 5 7 137.28 153.18 41.47 o
 -6 5 7 652.51 794.64 45.86 o
 -5 5 7 102.59 141.02 22.33 o
 -4 5 7 2755.53 2854.69 83.56 o
 -3 5 7 1415.00 1550.20 78.37 o
 -2 5 7 849.48 928.74 38.38 o
 -1 5 7 1226.29 1139.45 43.62 o
 0 5 7 105.65 104.15 19.00 o
 1 5 7 987.32 964.83 54.00 o
 2 5 7 720.58 651.48 55.23 o
 3 5 7 445.11 522.19 47.22 o
 4 5 7 166.45 236.97 45.00 o
 5 5 7 231.03 176.72 137.06 o
 6 5 7 5.36 12.27 66.14 o
 -9 6 7 30.65 64.08 47.73 o
 -8 6 7 523.19 637.89 94.44 o
 -7 6 7 35.24 40.52 59.32 o
 -6 6 7 1160.07 1292.12 88.99 o
 -5 6 7 117.62 61.97 20.94 o
 -4 6 7 337.09 343.37 24.49 o
 -3 6 7 318.85 481.67 49.27 o
 -2 6 7 264.86 400.67 26.80 o
 -1 6 7 727.94 831.76 40.20 o
 0 6 7 583.46 608.29 34.42 o
 1 6 7 1290.03 1129.69 106.34 o
 2 6 7 204.02 155.55 30.11 o
 3 6 7 465.30 424.10 43.96 o
 4 6 7 78.36 35.15 33.75 o
 5 6 7 12.76 -5.18 35.92 o
 6 6 7 40.06 31.37 64.10 o
 -9 7 7 62.37 101.96 48.04 o
 -8 7 7 709.05 765.51 157.52 o
 -7 7 7 2.82 -17.42 35.59 o
 -6 7 7 513.26 726.23 60.27 o
 -5 7 7 996.12 1036.89 48.87 o
 -4 7 7 1138.77 1025.43 40.53 o
 -3 7 7 1079.32 1132.41 46.43 o
 -2 7 7 4219.14 4103.44 118.99 o
 -1 7 7 3311.50 3098.89 98.18 o
 0 7 7 196.33 213.70 22.54 o
 1 7 7 183.59 288.15 32.54 o
 2 7 7 697.74 731.71 50.73 o
 3 7 7 413.64 447.14 98.87 o
 4 7 7 72.18 64.78 34.35 o
 5 7 7 154.31 105.15 40.63 o
 6 7 7 175.73 135.01 70.23 o
 -9 8 7 62.50 84.62 49.77 o
 -8 8 7 301.20 426.40 60.25 o
 -7 8 7 5.22 -5.92 35.39 o
 -6 8 7 250.46 261.28 44.23 o
 -5 8 7 1316.09 1214.04 58.94 o
 -4 8 7 229.95 218.35 26.59 o
 -3 8 7 773.77 959.40 44.93 o
 -2 8 7 1229.61 1299.07 50.02 o
 -1 8 7 242.99 364.98 27.34 o
 0 8 7 1147.11 1221.02 48.53 o
 1 8 7 1901.34 1815.07 78.52 o
 2 8 7 1030.30 914.95 56.60 o
 3 8 7 259.62 199.09 43.30 o
 4 8 7 304.58 323.78 44.04 o
 5 8 7 29.83 23.87 62.05 o
 6 8 7 29.98 22.50 70.92 o
 -9 9 7 1.28 -33.48 44.35 o
 -8 9 7 44.94 109.32 69.21 o
 -7 9 7 70.36 95.46 42.91 o
 -6 9 7 7.69 2.52 33.03 o
 -5 9 7 895.07 1016.05 54.49 o
 -4 9 7 975.51 942.50 73.96 o
 -3 9 7 438.59 584.28 48.37 o
 -2 9 7 1066.81 1209.40 90.94 o
 -1 9 7 1078.72 1059.39 45.28 o
 0 9 7 1146.15 1105.66 48.09 o
 1 9 7 923.07 818.78 55.23 o
 2 9 7 1164.34 1186.83 64.85 o
 3 9 7 287.15 294.68 52.51 o
 4 9 7 125.48 130.70 37.33 o
 5 9 7 94.48 121.38 64.10 o
 6 9 7 71.25 83.87 71.60 o
 -9 10 7 300.94 291.99 62.06 o
 -8 10 7 154.40 175.34 69.21 o
 -7 10 7 15.01 38.25 41.66 o
 -6 10 7 148.00 110.51 45.69 o
 -5 10 7 1237.57 1257.41 68.50 o
 -4 10 7 87.72 127.29 33.32 o
 -3 10 7 590.13 706.38 41.56 o
 -2 10 7 3049.14 2904.83 91.06 o
 -1 10 7 556.93 535.06 35.32 o
 0 10 7 294.14 382.90 38.62 o
 1 10 7 882.64 735.66 49.34 o
 2 10 7 183.15 230.16 46.71 o
 3 10 7 997.19 863.57 113.54 o
 4 10 7 223.37 346.33 72.28 o
 5 10 7 38.09 -26.59 59.32 o
 6 10 7 11.91 124.79 74.33 o
 -9 11 7 17.03 51.48 52.31 o
 -8 11 7 121.65 216.98 55.42 o
 -7 11 7 1002.90 1111.87 97.82 o
 -6 11 7 94.01 191.61 46.77 o
 -5 11 7 143.88 65.13 26.92 o
 -4 11 7 483.18 434.27 35.85 o
 -3 11 7 68.12 158.51 24.89 o
 -2 11 7 125.81 209.32 43.87 o
 -1 11 7 148.14 152.48 22.33 o
 0 11 7 1224.69 1148.36 50.76 o
 1 11 7 3329.08 3126.35 159.19 o
 2 11 7 352.82 416.26 40.57 o
 3 11 7 98.86 114.33 53.87 o
 4 11 7 32.96 89.33 62.05 o
 5 11 7 6.43 -46.37 57.28 o
 6 11 7 37.53 27.28 73.64 o
 -8 12 7 32.64 -3.28 43.96 o
 -7 12 7 192.15 318.71 57.93 o
 -6 12 7 10.19 50.92 45.35 o
 -5 12 7 266.67 302.14 35.17 o
 -4 12 7 107.09 182.78 45.65 o
 -3 12 7 82.05 116.60 24.16 o
 -2 12 7 527.22 506.44 29.23 o
 -1 12 7 3397.54 3143.98 97.35 o
 0 12 7 548.07 540.97 36.47 o
 1 12 7 399.17 405.95 39.71 o
 2 12 7 736.73 801.05 61.03 o
 3 12 7 61.93 170.96 34.40 o
 4 12 7 108.81 70.92 60.69 o
 5 12 7 9.40 55.92 68.87 o
 6 12 7 90.22 152.74 81.83 o
 -8 13 7 81.36 18.76 47.76 o
 -7 13 7 376.67 426.43 60.37 o
 -6 13 7 184.41 236.62 37.98 o
 -5 13 7 136.96 166.65 32.46 o
 -4 13 7 58.81 93.86 25.44 o
 -3 13 7 233.22 301.32 32.27 o
 -2 13 7 28.32 93.42 20.67 o
 -1 13 7 353.98 378.30 31.78 o
 0 13 7 545.28 554.07 36.81 o
 1 13 7 248.59 281.68 37.78 o
 2 13 7 1614.51 1503.05 121.04 o
 3 13 7 116.77 53.19 55.23 o
 4 13 7 68.95 90.01 63.42 o
 5 13 7 41.02 21.14 65.46 o
 -8 14 7 152.12 129.88 54.06 o
 -7 14 7 65.76 52.19 42.91 o
 -6 14 7 36.82 45.84 32.78 o
 -5 14 7 62.41 47.25 29.53 o
 -4 14 7 100.89 129.35 28.08 o
 -3 14 7 655.43 731.39 79.67 o
 -2 14 7 929.57 894.94 37.13 o
 -1 14 7 468.50 512.00 28.95 o
 0 14 7 446.01 461.64 36.07 o
 1 14 7 148.64 180.83 27.06 o
 2 14 7 441.49 496.90 44.39 o
 3 14 7 470.24 428.84 75.69 o
 4 14 7 247.85 278.21 77.05 o
 5 14 7 95.37 83.87 67.51 o
 -8 15 7 53.38 53.89 50.56 o
 -7 15 7 185.51 166.53 50.30 o
 -6 15 7 291.89 365.19 45.00 o
 -5 15 7 223.57 294.00 38.14 o
 -4 15 7 163.78 160.66 30.92 o
 -3 15 7 23.84 66.72 25.43 o
 -2 15 7 1085.12 1103.01 54.35 o
 -1 15 7 454.60 430.36 28.11 o
 0 15 7 648.46 459.42 36.40 o
 1 15 7 175.52 241.09 30.50 o
 2 15 7 599.14 634.23 107.06 o
 3 15 7 373.40 299.35 66.83 o
 4 15 7 80.08 -51.14 55.92 o
 5 15 7 16.87 55.23 70.23 o
 -8 16 7 324.14 376.90 99.86 o
 -7 16 7 36.64 -37.57 92.40 o
 -6 16 7 253.99 314.05 66.61 o
 -5 16 7 382.74 404.50 43.13 o
 -4 16 7 210.65 214.37 31.55 o
 -3 16 7 468.76 608.33 44.17 o
 -2 16 7 166.55 177.99 28.89 o
 -1 16 7 378.68 399.51 28.43 o
 0 16 7 2693.07 2758.82 92.31 o
 1 16 7 381.29 391.84 47.84 o
 2 16 7 466.71 396.79 70.23 o
 3 16 7 41.35 107.06 58.64 o
 4 16 7 299.57 312.31 79.10 o
 5 16 7 35.55 45.69 70.23 o
 -8 17 7 133.98 152.79 67.51 o
 -7 17 7 188.38 104.46 53.55 o
 -6 17 7 87.32 128.38 55.98 o
 -5 17 7 60.12 161.43 36.82 o
 -4 17 7 271.79 260.70 50.18 o
 -3 17 7 123.84 172.73 31.47 o
 -2 17 7 561.01 643.02 44.64 o
 -1 17 7 635.46 735.82 36.42 o
 0 17 7 117.21 160.40 28.29 o
 1 17 7 319.12 364.02 34.93 o
 2 17 7 378.77 327.99 66.83 o
 3 17 7 183.98 173.88 64.10 o
 4 17 7 372.09 463.62 85.92 o
 5 17 7 145.92 145.93 79.10 o
 -7 18 7 176.10 271.46 109.41 o
 -6 18 7 713.28 818.62 61.26 o
 -5 18 7 31.04 43.88 33.10 o
 -4 18 7 143.60 68.28 44.18 o
 -3 18 7 74.13 112.84 29.71 o
 -2 18 7 104.70 141.62 29.72 o
 -1 18 7 24.18 3.89 18.81 o
 0 18 7 537.02 590.80 34.96 o
 1 18 7 848.05 863.65 68.56 o
 2 18 7 87.25 94.10 53.19 o
 3 18 7 114.05 60.69 57.96 o
 4 18 7 30.60 -55.23 57.96 o
 5 18 7 2.15 117.29 72.28 o
 -7 19 7 34.03 115.06 56.20 o
 -6 19 7 46.42 145.68 41.58 o
 -5 19 7 67.08 96.28 35.47 o
 -4 19 7 279.88 374.10 56.66 o
 -3 19 7 377.90 374.34 44.49 o
 -2 19 7 486.09 533.80 43.29 o
 -1 19 7 48.39 82.56 27.12 o
 0 19 7 66.32 94.46 30.31 o
 1 19 7 156.23 194.69 61.37 o
 2 19 7 17.05 68.87 56.60 o
 3 19 7 297.63 242.07 70.92 o
 4 19 7 91.08 44.32 66.14 o
 -7 20 7 49.85 38.70 41.40 o
 -6 20 7 64.84 106.49 38.90 o
 -5 20 7 3.29 31.04 34.34 o
 -4 20 7 844.89 915.39 59.91 o
 -3 20 7 25.06 33.55 32.11 o
 -2 20 7 73.22 180.32 39.95 o
 -1 20 7 172.44 192.90 32.29 o
 0 20 7 11.50 12.90 20.68 o
 1 20 7 887.84 806.51 112.51 o
 2 20 7 67.63 107.74 62.05 o
 3 20 7 320.39 257.76 70.23 o
 4 20 7 210.87 265.94 76.37 o
 -7 21 7 50.39 11.70 44.35 o
 -6 21 7 129.77 158.45 45.66 o
 -5 21 7 93.73 112.47 38.55 o
 -4 21 7 137.53 100.60 34.35 o
 -3 21 7 50.81 74.40 32.99 o
 -2 21 7 29.56 53.72 37.48 o
 -1 21 7 99.22 158.70 31.17 o
 0 21 7 63.54 61.38 29.23 o
 1 21 7 281.76 292.42 70.20 o
 2 21 7 241.80 239.34 68.87 o
 3 21 7 23.69 -51.82 60.01 o
 4 21 7 29.88 -0.68 63.42 o
 -7 22 7 16.20 63.00 44.78 o
 -6 22 7 102.99 148.14 42.53 o
 -5 22 7 49.17 47.30 36.73 o
 -4 22 7 3.13 68.28 34.41 o
 -3 22 7 216.37 149.42 50.77 o
 -2 22 7 74.32 25.53 29.96 o
 -1 22 7 46.46 38.49 28.18 o
 0 22 7 42.80 2.62 57.62 o
 1 22 7 25.52 54.59 38.33 o
 2 22 7 1.29 -12.96 53.87 o
 3 22 7 110.59 68.19 67.51 o
 4 22 7 123.81 124.10 73.64 o
 -6 23 7 46.10 75.57 43.56 o
 -5 23 7 587.20 639.17 96.99 o
 -4 23 7 23.52 -7.03 32.12 o
 -3 23 7 32.51 45.61 32.77 o
 -2 23 7 58.86 88.74 31.47 o
 -1 23 7 368.64 359.92 50.78 o
 0 23 7 203.12 210.93 84.21 o
 1 23 7 93.62 120.77 42.91 o
 2 23 7 253.33 270.71 72.96 o
 3 23 7 4.57 8.86 64.78 o
 -6 24 7 43.78 18.58 42.60 o
 -5 24 7 62.41 38.92 39.44 o
 -4 24 7 20.32 -32.76 32.76 o
 -3 24 7 314.50 295.99 43.00 o
 -2 24 7 51.85 53.40 33.06 o
 -1 24 7 16.27 20.60 39.03 o
 0 24 7 355.12 317.09 53.69 o
 1 24 7 136.44 124.18 44.60 o
 2 24 7 7.64 21.14 57.96 o
 3 24 7 33.49 55.23 70.23 o
 -5 25 7 46.20 0.44 39.98 o
 -4 25 7 9.41 19.07 64.94 o
 -3 25 7 155.36 193.29 41.09 o
 -2 25 7 11.93 -12.96 30.90 o
 -1 25 7 110.05 174.31 48.80 o
 0 25 7 224.33 265.58 51.75 o
 1 25 7 308.98 177.32 48.41 o
 2 25 7 71.14 84.55 65.46 o
 3 25 7 95.73 129.56 72.96 o
 -5 26 7 11.57 46.49 40.69 o
 -4 26 7 4.20 -20.24 44.95 o
 -3 26 7 171.27 281.20 54.53 o
 -2 26 7 261.81 239.89 51.58 o
 -1 26 7 41.74 -11.88 40.64 o
 0 26 7 169.07 151.62 63.42 o
 1 26 7 30.92 64.80 45.08 o
 2 26 7 12.45 -57.96 57.96 o
 -5 27 7 20.19 6.37 55.99 o
 -4 27 7 64.90 15.78 53.34 o
 -3 27 7 1.88 104.90 38.77 o
 -2 27 7 98.69 121.90 50.56 o
 -1 27 7 2.05 71.27 45.43 o
 0 27 7 83.35 105.61 61.37 o
 1 27 7 85.32 180.99 51.35 o
 2 27 7 72.78 19.77 66.83 o
 -4 28 7 4.37 1.15 62.47 o
 -3 28 7 39.53 37.02 50.73 o
 -2 28 7 216.67 205.78 56.79 o
 -1 28 7 122.97 168.02 52.02 o
 0 28 7 132.53 99.45 78.76 o
 1 28 7 58.11 22.03 47.01 o
 -3 29 7 131.22 131.10 56.29 o
 -2 29 7 31.21 81.11 50.77 o
 -1 29 7 136.76 131.27 50.29 o
 0 29 7 3.67 -39.51 44.16 o
 -2 30 7 20.15 1.99 50.43 o
 -1 30 7 13.46 -19.71 45.88 o
 0 -27 8 35.05 8.86 60.01 o
 1 -27 8 50.10 126.15 68.87 o
 0 -26 8 72.20 105.69 65.46 o
 1 -26 8 100.64 246.16 74.33 o
 -1 -25 8 44.87 62.73 57.28 o
 0 -25 8 177.09 262.53 71.60 o
 1 -25 8 26.53 -38.19 61.37 o
 2 -25 8 77.91 2.05 69.55 o
 -1 -24 8 527.31 711.15 89.33 o
 0 -24 8 34.58 109.10 59.32 o
 1 -24 8 10.74 -8.86 56.60 o
 2 -24 8 28.93 -6.14 68.87 o
 -2 -23 8 21.53 51.82 51.82 o
 -1 -23 8 102.27 132.97 60.69 o
 0 -23 8 183.62 227.75 67.51 o
 1 -23 8 163.47 218.89 72.96 o
 2 -23 8 30.17 98.19 70.92 o
 3 -23 8 39.45 6.14 70.92 o
 -2 -22 8 270.44 347.02 63.42 o
 -1 -22 8 31.53 77.74 51.14 o
 0 -22 8 4.38 45.00 53.19 o
 1 -22 8 99.04 144.56 64.10 o
 2 -22 8 167.81 223.66 77.74 o
 3 -22 8 6.72 1.36 74.33 o
 -2 -21 8 194.09 267.30 61.37 o
 -1 -21 8 270.52 366.11 65.46 o
 0 -21 8 473.49 494.99 77.05 o
 1 -21 8 39.47 -40.23 47.73 o
 2 -21 8 25.98 66.83 67.51 o
 3 -21 8 3.57 38.19 76.37 o
 -3 -20 8 212.18 79.78 43.64 o
 -2 -20 8 114.49 100.92 51.14 o
 -1 -20 8 83.19 108.42 53.19 o
 0 -20 8 22.99 67.51 51.14 o
 1 -20 8 538.32 586.36 81.83 o
 2 -20 8 348.08 434.30 87.28 o
 3 -20 8 44.44 31.37 70.92 o
 4 -20 8 70.58 92.74 78.42 o
 -3 -19 8 446.19 213.43 51.82 o
 -2 -19 8 223.69 219.57 56.60 o
 -1 -19 8 469.96 593.86 76.37 o
 0 -19 8 101.31 99.56 55.23 o
 1 -19 8 38.32 25.23 49.10 o
 2 -19 8 0.35 -55.23 55.23 o
 3 -19 8 118.18 165.70 77.05 o
 4 -19 8 21.91 20.46 66.83 o
 -4 -18 8 202.57 207.98 49.78 o
 -3 -18 8 56.01 32.73 38.19 o
 -2 -18 8 70.94 126.83 47.73 o
 -1 -18 8 789.08 877.53 87.96 o
 0 -18 8 58.58 7.50 46.37 o
 1 -18 8 542.92 430.21 74.33 o
 2 -18 8 37.73 10.23 62.73 o
 3 -18 8 149.46 255.03 77.74 o
 4 -18 8 27.77 32.73 68.19 o
 -4 -17 8 353.99 327.31 54.55 o
 -3 -17 8 701.80 477.94 64.78 o
 -2 -17 8 393.68 524.99 66.14 o
 -1 -17 8 58.60 1.36 43.64 o
 0 -17 8 110.26 87.28 51.14 o
 1 -17 8 109.54 102.97 55.92 o
 2 -17 8 37.49 -19.09 55.92 o
 3 -17 8 407.50 578.18 96.83 o
 4 -17 8 68.82 41.60 72.28 o
 -4 -16 8 30.00 103.65 41.60 o
 -3 -16 8 5.91 -26.59 34.09 o
 -2 -16 8 472.37 533.17 68.87 o
 -1 -16 8 367.76 313.67 58.64 o
 0 -16 8 1208.78 1215.68 102.28 o
 1 -16 8 527.12 558.40 74.33 o
 2 -16 8 101.29 115.24 55.92 o
 3 -16 8 37.66 102.28 66.14 o
 4 -16 8 0.17 -8.18 70.23 o
 -5 -15 8 118.70 136.38 44.32 o
 -4 -15 8 374.15 437.71 59.32 o
 -3 -15 8 662.97 595.91 68.19 o
 -2 -15 8 253.26 242.07 51.14 o
 -1 -15 8 223.58 162.29 48.41 o
 0 -15 8 1242.52 1150.90 96.83 o
 1 -15 8 187.62 282.30 62.05 o
 2 -15 8 12.74 1.36 53.87 o
 3 -15 8 48.58 24.55 53.87 o
 4 -15 8 267.93 200.48 81.15 o
 5 -15 8 51.83 30.69 70.23 o
 -5 -14 8 509.45 531.13 65.46 o
 -4 -14 8 292.35 351.11 53.87 o
 -3 -14 8 352.27 291.85 51.82 o
 -2 -14 8 1622.32 1720.21 108.42 o
 -1 -14 8 356.90 317.08 54.55 o
 0 -14 8 163.24 229.12 53.87 o
 1 -14 8 123.23 133.65 53.87 o
 2 -14 8 17.69 26.59 49.10 o
 3 -14 8 36.88 70.23 63.42 o
 4 -14 8 20.25 -10.91 59.32 o
 5 -14 8 119.44 271.39 88.65 o
 -5 -13 8 489.93 514.76 64.10 o
 -4 -13 8 1679.65 1611.18 107.74 o
 -3 -13 8 117.44 219.57 45.69 o
 -2 -13 8 866.86 980.49 81.83 o
 -1 -13 8 47.42 99.56 44.32 o
 0 -13 8 250.47 331.40 59.32 o
 1 -13 8 2021.28 1927.51 128.20 o
 2 -13 8 1490.27 1264.77 112.51 o
 3 -13 8 105.44 52.51 58.64 o
 4 -13 8 23.33 57.28 66.14 o
 5 -13 8 45.85 25.91 62.73 o
 -6 -12 8 53.07 91.37 43.64 o
 -5 -12 8 385.48 513.40 64.10 o
 -4 -12 8 2136.70 2140.94 122.74 o
 -3 -12 8 75.76 155.47 42.96 o
 -2 -12 8 1770.07 1874.32 114.56 o
 -1 -12 8 171.64 135.70 45.69 o
 0 -12 8 126.73 135.70 47.73 o
 1 -12 8 908.42 863.21 90.01 o
 2 -12 8 641.01 605.45 84.55 o
 3 -12 8 170.97 169.79 58.64 o
 4 -12 8 268.25 388.61 81.83 o
 5 -12 8 76.77 19.09 72.96 o
 -6 -11 8 322.41 419.98 61.37 o
 -5 -11 8 1366.94 1338.42 92.06 o
 -4 -11 8 442.49 488.17 59.32 o
 -3 -11 8 101.45 96.15 36.82 o
 -2 -11 8 1780.45 1602.99 102.28 o
 -1 -11 8 100.78 246.16 50.46 o
 0 -11 8 1550.35 1487.75 106.38 o
 1 -11 8 548.29 402.25 68.19 o
 2 -11 8 282.06 279.58 63.42 o
 3 -11 8 364.51 359.29 71.60 o
 4 -11 8 4.30 39.55 56.60 o
 5 -11 8 73.29 95.46 73.64 o
 -7 -10 8 39.98 52.51 47.05 o
 -6 -10 8 81.14 64.78 43.64 o
 -5 -10 8 471.69 507.26 66.14 o
 -4 -10 8 1145.40 1198.63 87.96 o
 -3 -10 8 373.59 398.16 55.92 o
 -2 -10 8 710.02 681.82 69.55 o
 -1 -10 8 187.95 229.12 45.00 o
 0 -10 8 13.95 30.69 38.87 o
 1 -10 8 305.64 479.30 66.14 o
 2 -10 8 327.01 233.21 56.60 o
 3 -10 8 108.22 45.00 50.46 o
 4 -10 8 756.65 683.19 96.15 o
 5 -10 8 71.96 135.01 72.28 o
 -7 -9 8 101.70 112.51 47.05 o
 -6 -9 8 64.84 139.79 49.10 o
 -5 -9 8 239.41 229.80 50.46 o
 -4 -9 8 985.36 986.63 81.83 o
 -3 -9 8 1576.82 1513.67 104.33 o
 -2 -9 8 945.63 906.17 72.28 o
 -1 -9 8 235.92 219.57 43.64 o
 0 -9 8 332.12 255.71 52.51 o
 1 -9 8 427.34 471.80 66.83 o
 2 -9 8 122.90 128.20 53.19 o
 3 -9 8 133.38 83.19 51.14 o
 4 -9 8 43.52 -21.82 52.51 o
 5 -9 8 132.65 63.42 64.78 o
 -7 -8 8 133.60 130.92 49.78 o
 -6 -8 8 76.94 40.23 40.91 o
 -5 -8 8 932.79 1005.72 83.87 o
 -4 -8 8 254.61 380.19 35.69 o
 -3 -8 8 23.18 33.41 31.37 o
 -2 -8 8 822.47 739.10 73.64 o
 -1 -8 8 1335.62 1368.42 87.28 o
 0 -8 8 114.29 132.29 43.64 o
 1 -8 8 74.89 53.19 38.19 o
 2 -8 8 1088.78 1107.94 102.28 o
 3 -8 8 62.70 107.06 57.96 o
 4 -8 8 65.86 17.73 60.01 o
 5 -8 8 115.14 162.97 73.64 o
 -8 -7 8 13.69 -2.73 48.41 o
 -7 -7 8 24.48 19.77 42.28 o
 -6 -7 8 11.66 100.92 44.32 o
 -5 -7 8 535.32 531.13 64.10 o
 -4 -7 8 362.31 383.60 36.01 o
 -3 -7 8 1071.70 1082.71 83.87 o
 -2 -7 8 47.70 75.01 36.82 o
 -1 -7 8 823.38 939.46 43.51 o
 0 -7 8 685.04 669.55 72.28 o
 1 -7 8 65.88 138.42 42.96 o
 2 -7 8 41.10 195.70 55.23 o
 3 -7 8 131.72 99.56 49.78 o
 4 -7 8 158.22 19.77 60.69 o
 5 -7 8 34.49 2.05 68.87 o
 -8 -6 8 121.30 143.88 57.28 o
 -7 -6 8 86.00 12.27 45.00 o
 -6 -6 8 235.17 191.61 52.51 o
 -5 -6 8 2584.08 2279.39 94.54 o
 -4 -6 8 980.76 1030.13 55.91 o
 -3 -6 8 84.53 104.33 38.87 o
 -2 -6 8 467.38 509.31 57.96 o
 -1 -6 8 181.49 126.53 17.42 o
 0 -6 8 4.22 -7.45 18.15 o
 1 -6 8 341.90 366.79 55.23 o
 2 -6 8 911.66 795.02 89.33 o
 3 -6 8 232.31 312.99 66.83 o
 4 -6 8 77.29 40.23 60.01 o
 5 -6 8 84.37 21.14 62.73 o
 6 -6 8 4.77 -12.67 55.57 o
 -8 -5 8 132.16 166.38 58.64 o
 -7 -5 8 135.49 72.28 46.37 o
 -6 -5 8 470.13 600.68 75.01 o
 -5 -5 8 1211.23 1111.19 60.67 o
 -4 -5 8 505.54 504.33 54.21 o
 -3 -5 8 734.53 737.74 48.58 o
 -2 -5 8 438.68 344.29 49.10 o
 -1 -5 8 1938.71 2020.18 125.81 o
 0 -5 8 178.89 155.04 24.89 o
 1 -5 8 310.19 280.60 32.96 o
 2 -5 8 15.34 163.65 49.78 o
 3 -5 8 303.52 321.17 68.19 o
 4 -5 8 112.50 87.28 58.64 o
 5 -5 8 50.72 -28.36 45.01 o
 6 -5 8 79.43 124.14 55.13 o
 -9 -4 8 32.04 44.32 58.64 o
 -8 -4 8 228.62 225.02 62.05 o
 -7 -4 8 524.83 558.40 75.69 o
 -6 -4 8 182.39 178.55 33.38 o
 -5 -4 8 478.99 614.75 66.14 o
 -4 -4 8 510.63 552.71 43.14 o
 -3 -4 8 88.85 93.56 24.09 o
 -2 -4 8 1426.75 1575.04 105.01 o
 -1 -4 8 371.34 395.89 26.29 o
 0 -4 8 29.91 41.73 19.00 o
 1 -4 8 1534.99 1675.06 75.05 o
 2 -4 8 673.95 672.52 51.75 o
 3 -4 8 73.90 23.44 33.10 o
 4 -4 8 137.57 75.43 89.33 o
 5 -4 8 62.43 91.71 46.77 o
 6 -4 8 25.87 36.42 90.35 o
 -9 -3 8 124.05 88.65 61.37 o
 -8 -3 8 107.90 143.20 59.32 o
 -7 -3 8 86.54 45.00 47.05 o
 -6 -3 8 10.24 21.57 27.17 o
 -5 -3 8 1107.39 1177.32 62.27 o
 -4 -3 8 1355.36 1503.30 69.04 o
 -3 -3 8 310.86 332.29 43.27 o
 -2 -3 8 508.83 569.99 58.64 o
 -1 -3 8 595.50 497.96 29.91 o
 0 -3 8 1085.76 1094.84 53.23 o
 1 -3 8 451.32 420.38 66.83 o
 2 -3 8 285.37 300.25 36.61 o
 3 -3 8 1159.27 1363.79 76.37 o
 4 -3 8 105.10 27.67 66.14 o
 5 -3 8 117.19 71.80 44.77 o
 6 -3 8 33.07 0.48 56.94 o
 -9 -2 8 271.62 343.61 79.78 o
 -8 -2 8 486.45 434.98 75.01 o
 -7 -2 8 103.93 91.21 59.32 o
 -6 -2 8 743.26 742.30 55.71 o
 -5 -2 8 182.25 190.28 32.76 o
 -4 -2 8 651.36 579.92 44.29 o
 -3 -2 8 69.29 85.51 25.02 o
 -2 -2 8 668.13 727.79 48.70 o
 -1 -2 8 1304.73 1205.25 71.60 o
 0 -2 8 299.65 376.70 58.27 o
 1 -2 8 481.67 528.38 41.26 o
 2 -2 8 352.72 445.16 44.55 o
 3 -2 8 44.05 115.57 55.57 o
 4 -2 8 390.58 293.59 73.95 o
 5 -2 8 306.40 267.85 52.50 o
 6 -2 8 38.85 23.58 48.37 o
 -9 -1 8 76.31 49.78 60.69 o
 -8 -1 8 339.82 224.34 64.10 o
 -7 -1 8 247.57 343.84 46.17 o
 -6 -1 8 1562.37 1358.40 72.95 o
 -5 -1 8 77.71 111.74 49.44 o
 -4 -1 8 128.78 105.94 28.18 o
 -3 -1 8 130.57 198.12 28.92 o
 -2 -1 8 90.25 104.11 26.02 o
 -1 -1 8 111.47 157.44 44.66 o
 0 -1 8 1414.14 1353.44 61.24 o
 1 -1 8 230.15 153.69 29.71 o
 2 -1 8 878.43 925.58 59.99 o
 3 -1 8 467.63 368.78 70.20 o
 4 -1 8 133.95 136.44 55.92 o
 5 -1 8 95.59 207.87 121.72 o
 6 -1 8 120.94 203.06 56.10 o
 -9 0 8 260.70 317.08 77.05 o
 -8 0 8 1.65 -2.05 53.87 o
 -7 0 8 100.61 130.89 36.89 o
 -6 0 8 467.66 440.75 44.77 o
 -5 0 8 64.70 31.23 27.43 o
 -4 0 8 113.27 199.13 57.28 o
 -3 0 8 1.14 8.33 21.14 o
 -2 0 8 2471.26 2628.30 79.41 o
 -1 0 8 326.83 338.93 53.15 o
 0 0 8 8.98 21.48 18.78 o
 1 0 8 135.08 132.22 27.52 o
 2 0 8 2786.30 2864.30 115.93 o
 3 0 8 33.40 62.77 32.78 o
 4 0 8 3.74 36.22 42.96 o
 5 0 8 167.19 235.22 50.57 o
 6 0 8 8.26 17.20 46.74 o
 -9 1 8 76.31 87.28 66.14 o
 -8 1 8 339.82 280.40 48.80 o
 -7 1 8 247.57 323.03 46.28 o
 -6 1 8 1562.37 1394.00 91.03 o
 -5 1 8 77.71 113.26 30.34 o
 -4 1 8 128.78 142.73 31.10 o
 -3 1 8 130.57 227.73 20.10 o
 -2 1 8 90.25 111.78 14.67 o
 -1 1 8 111.47 146.38 20.62 o
 0 1 8 1414.14 1447.22 63.10 o
 1 1 8 230.15 212.37 29.63 o
 2 1 8 878.43 857.90 68.19 o
 3 1 8 467.63 435.04 56.26 o
 4 1 8 133.95 134.28 48.41 o
 5 1 8 95.59 124.72 47.05 o
 6 1 8 120.94 178.62 53.90 o
 -9 2 8 271.62 160.93 73.64 o
 -8 2 8 486.45 477.94 75.01 o
 -7 2 8 103.93 122.70 39.88 o
 -6 2 8 743.26 773.85 105.01 o
 -5 2 8 182.25 167.77 34.68 o
 -4 2 8 651.36 610.07 47.93 o
 -3 2 8 69.29 89.81 15.80 o
 -2 2 8 668.13 699.70 53.00 o
 -1 2 8 1304.73 1126.81 45.13 o
 0 2 8 299.65 330.16 44.97 o
 1 2 8 481.67 458.94 39.78 o
 2 2 8 352.72 414.48 42.40 o
 3 2 8 44.05 41.88 32.54 o
 4 2 8 390.58 365.04 77.36 o
 5 2 8 306.40 308.67 51.79 o
 6 2 8 38.85 -17.33 45.55 o
 -9 3 8 124.05 31.37 61.37 o
 -8 3 8 107.90 105.60 50.12 o
 -7 3 8 86.54 112.57 57.62 o
 -6 3 8 10.24 23.46 33.20 o
 -5 3 8 1107.39 992.00 93.39 o
 -4 3 8 1355.36 1300.31 127.17 o
 -3 3 8 310.86 386.02 26.89 o
 -2 3 8 508.83 538.61 29.23 o
 -1 3 8 595.50 546.85 31.50 o
 0 3 8 1085.76 1116.10 63.08 o
 1 3 8 451.32 478.90 40.26 o
 2 3 8 285.37 190.90 36.82 o
 3 3 8 1159.27 1178.43 73.33 o
 4 3 8 105.10 70.49 37.37 o
 5 3 8 117.19 122.02 45.25 o
 6 3 8 33.07 69.92 48.43 o
 -9 4 8 32.04 -1.65 44.81 o
 -8 4 8 228.62 234.07 56.94 o
 -7 4 8 524.83 596.91 61.14 o
 -6 4 8 182.39 215.40 40.57 o
 -5 4 8 478.99 518.42 149.33 o
 -4 4 8 510.63 531.11 34.61 o
 -3 4 8 88.85 124.72 24.77 o
 -2 4 8 1426.74 1671.76 57.36 o
 -1 4 8 371.34 349.76 26.81 o
 0 4 8 29.91 46.64 29.66 o
 1 4 8 1534.99 1624.28 74.98 o
 2 4 8 673.95 620.17 49.76 o
 3 4 8 73.90 95.04 34.41 o
 4 4 8 137.57 114.08 38.43 o
 5 4 8 62.43 84.32 42.62 o
 6 4 8 25.87 39.55 69.55 o
 -9 5 8 96.92 113.78 52.45 o
 -8 5 8 132.16 150.66 103.99 o
 -7 5 8 135.49 162.93 43.98 o
 -6 5 8 470.13 547.92 71.26 o
 -5 5 8 1211.22 1153.45 69.09 o
 -4 5 8 505.54 546.89 35.13 o
 -3 5 8 734.53 637.27 35.41 o
 -2 5 8 438.68 422.87 28.03 o
 -1 5 8 1938.71 1960.65 66.78 o
 0 5 8 178.89 166.20 26.40 o
 1 5 8 310.19 313.45 40.54 o
 2 5 8 15.34 50.40 28.92 o
 3 5 8 303.52 397.62 46.48 o
 4 5 8 112.50 145.76 105.69 o
 5 5 8 50.72 93.42 43.27 o
 6 5 8 79.43 92.74 75.01 o
 -9 6 8 55.92 -39.84 45.41 o
 -8 6 8 121.30 74.53 43.88 o
 -7 6 8 86.00 -3.70 38.08 o
 -6 6 8 235.17 295.90 46.58 o
 -5 6 8 2584.07 2346.11 247.83 o
 -4 6 8 980.77 1002.61 64.18 o
 -3 6 8 84.53 94.98 29.30 o
 -2 6 8 467.38 402.86 35.68 o
 -1 6 8 181.49 217.67 23.34 o
 0 6 8 4.22 -3.71 28.64 o
 1 6 8 341.90 438.65 70.23 o
 2 6 8 911.66 1021.58 62.00 o
 3 6 8 232.31 329.32 43.27 o
 4 6 8 77.29 169.36 41.66 o
 5 6 8 84.37 25.37 41.74 o
 6 6 8 4.77 -47.73 67.51 o
 -9 7 8 32.05 -10.36 45.07 o
 -8 7 8 13.69 52.03 45.20 o
 -7 7 8 24.48 13.97 40.09 o
 -6 7 8 11.66 115.01 39.72 o
 -5 7 8 535.32 469.03 47.97 o
 -4 7 8 362.31 369.65 48.65 o
 -3 7 8 1071.70 1062.63 66.92 o
 -2 7 8 47.70 117.01 20.55 o
 -1 7 8 823.38 899.09 44.09 o
 0 7 8 685.04 621.92 38.38 o
 1 7 8 65.88 154.33 30.11 o
 2 7 8 41.10 82.27 49.78 o
 3 7 8 131.72 111.53 34.68 o
 4 7 8 158.22 264.99 95.09 o
 5 7 8 34.49 -11.59 63.42 o
 -9 8 8 245.02 296.88 59.79 o
 -8 8 8 53.57 133.64 49.64 o
 -7 8 8 133.60 137.65 44.33 o
 -6 8 8 76.94 141.19 40.49 o
 -5 8 8 932.79 967.94 52.78 o
 -4 8 8 254.60 382.22 33.17 o
 -3 8 8 23.18 58.04 20.05 o
 -2 8 8 822.47 728.93 62.69 o
 -1 8 8 1335.62 1117.75 56.18 o
 0 8 8 114.29 143.16 28.60 o
 1 8 8 74.89 82.39 27.65 o
 2 8 8 1088.78 1177.30 68.29 o
 3 8 8 62.70 103.92 35.52 o
 4 8 8 65.86 74.85 38.33 o
 5 8 8 115.15 91.37 67.51 o
 -9 9 8 42.35 -8.95 71.60 o
 -8 9 8 10.65 110.02 50.38 o
 -7 9 8 101.70 85.08 40.38 o
 -6 9 8 64.84 113.69 70.58 o
 -5 9 8 239.40 304.58 34.23 o
 -4 9 8 985.36 996.83 62.82 o
 -3 9 8 1576.83 1654.87 103.34 o
 -2 9 8 945.63 870.20 46.28 o
 -1 9 8 235.92 184.71 24.28 o
 0 9 8 332.13 268.59 28.54 o
 1 9 8 427.33 444.76 41.94 o
 2 9 8 122.90 123.93 32.42 o
 3 9 8 133.38 109.38 35.24 o
 4 9 8 43.52 43.93 37.46 o
 5 9 8 132.65 77.74 66.14 o
 -8 10 8 16.73 19.13 46.99 o
 -7 10 8 39.98 12.87 64.78 o
 -6 10 8 81.14 103.34 42.42 o
 -5 10 8 471.69 565.49 42.67 o
 -4 10 8 1145.40 1074.83 83.78 o
 -3 10 8 373.59 417.75 34.49 o
 -2 10 8 710.02 762.97 69.27 o
 -1 10 8 187.95 172.04 24.24 o
 0 10 8 13.95 33.17 21.41 o
 1 10 8 305.64 352.73 39.19 o
 2 10 8 327.01 382.50 51.11 o
 3 10 8 108.22 109.66 35.69 o
 4 10 8 756.65 1014.59 112.51 o
 5 10 8 71.96 -55.23 60.01 o
 -8 11 8 121.76 220.74 56.84 o
 -7 11 8 85.02 63.19 44.56 o
 -6 11 8 322.41 297.12 87.93 o
 -5 11 8 1366.93 1088.84 121.95 o
 -4 11 8 442.49 469.74 38.48 o
 -3 11 8 101.45 114.44 24.95 o
 -2 11 8 1780.46 1562.12 73.43 o
 -1 11 8 100.78 256.51 28.16 o
 0 11 8 1550.35 1663.34 63.97 o
 1 11 8 548.29 592.31 48.15 o
 2 11 8 282.05 263.47 55.92 o
 3 11 8 364.51 436.17 47.67 o
 4 11 8 4.30 68.19 60.01 o
 5 11 8 73.29 43.64 68.19 o
 -8 12 8 75.97 0.35 45.43 o
 -7 12 8 18.99 36.93 46.53 o
 -6 12 8 53.07 102.87 46.79 o
 -5 12 8 385.48 298.46 35.75 o
 -4 12 8 2136.71 1832.48 73.77 o
 -3 12 8 75.76 140.50 26.10 o
 -2 12 8 1770.08 1775.61 134.23 o
 -1 12 8 171.64 132.48 24.39 o
 0 12 8 126.73 153.93 26.52 o
 1 12 8 908.42 1007.16 62.69 o
 2 12 8 641.01 636.31 71.94 o
 3 12 8 170.97 126.86 38.76 o
 4 12 8 268.25 239.34 73.64 o
 5 12 8 76.77 6.14 64.78 o
 -8 13 8 51.63 61.87 54.64 o
 -7 13 8 13.51 127.85 50.12 o
 -6 13 8 512.82 511.07 48.77 o
 -5 13 8 489.93 422.57 41.33 o
 -4 13 8 1679.64 1538.05 83.62 o
 -3 13 8 117.44 187.92 31.11 o
 -2 13 8 866.87 951.14 49.90 o
 -1 13 8 47.42 42.92 23.29 o
 0 13 8 250.48 234.83 55.35 o
 1 13 8 2021.29 1930.42 87.97 o
 2 13 8 1490.27 1555.24 113.54 o
 3 13 8 105.44 101.60 58.64 o
 4 13 8 23.33 47.05 62.05 o
 5 13 8 45.85 102.97 73.64 o
 -8 14 8 45.31 94.31 55.91 o
 -7 14 8 167.79 175.27 87.28 o
 -6 14 8 4.31 29.22 32.19 o
 -5 14 8 509.45 496.76 72.10 o
 -4 14 8 292.35 259.39 34.59 o
 -3 14 8 352.27 275.79 32.95 o
 -2 14 8 1622.31 1499.44 113.45 o
 -1 14 8 356.90 379.15 35.85 o
 0 14 8 163.24 178.82 28.76 o
 1 14 8 123.23 98.91 33.10 o
 2 14 8 17.69 64.87 32.76 o
 3 14 8 36.88 4.77 51.14 o
 4 14 8 20.25 57.96 64.10 o
 5 14 8 119.44 171.84 77.74 o
 -8 15 8 61.43 26.44 55.57 o
 -7 15 8 161.06 87.30 110.81 o
 -6 15 8 212.96 234.23 40.93 o
 -5 15 8 118.70 127.89 32.38 o
 -4 15 8 374.15 386.87 38.76 o
 -3 15 8 662.97 623.65 43.70 o
 -2 15 8 253.26 268.78 32.47 o
 -1 15 8 223.58 229.47 30.32 o
 0 15 8 1242.52 1187.44 57.54 o
 1 15 8 187.62 211.65 79.78 o
 2 15 8 12.74 -10.23 49.78 o
 3 15 8 48.58 0.68 53.19 o
 4 15 8 267.93 256.39 79.10 o
 5 15 8 51.83 137.06 77.74 o
 -8 16 8 96.24 85.03 53.97 o
 -7 16 8 21.46 3.15 48.98 o
 -6 16 8 98.00 29.96 34.31 o
 -5 16 8 218.71 253.76 39.09 o
 -4 16 8 30.00 29.69 29.35 o
 -3 16 8 5.91 5.94 30.97 o
 -2 16 8 472.37 453.06 55.19 o
 -1 16 8 367.77 359.86 35.64 o
 0 16 8 1208.78 1215.23 59.62 o
 1 16 8 527.12 571.18 121.72 o
 2 16 8 101.29 137.74 55.92 o
 3 16 8 37.66 45.00 59.32 o
 4 16 8 0.17 84.55 63.42 o
 -7 17 8 169.51 104.47 54.11 o
 -6 17 8 17.31 80.89 45.26 o
 -5 17 8 83.46 53.56 33.15 o
 -4 17 8 353.99 284.01 38.06 o
 -3 17 8 701.81 559.91 44.57 o
 -2 17 8 393.68 300.46 35.42 o
 -1 17 8 58.60 85.56 26.90 o
 0 17 8 110.26 164.43 31.05 o
 1 17 8 109.54 135.50 31.00 o
 2 17 8 37.49 78.42 55.92 o
 3 17 8 407.50 412.48 83.87 o
 4 17 8 68.82 22.50 62.73 o
 -7 18 8 97.48 21.51 54.39 o
 -6 18 8 246.33 154.76 40.69 o
 -5 18 8 168.64 211.91 39.18 o
 -4 18 8 202.57 89.94 36.18 o
 -3 18 8 56.01 35.77 44.45 o
 -2 18 8 70.94 174.60 38.58 o
 -1 18 8 789.08 809.50 50.90 o
 0 18 8 58.58 67.56 27.15 o
 1 18 8 542.92 604.28 58.53 o
 2 18 8 37.73 132.97 59.32 o
 3 18 8 149.46 40.23 63.42 o
 4 18 8 27.77 94.78 68.19 o
 -7 19 8 41.02 42.26 42.74 o
 -6 19 8 126.34 99.86 40.41 o
 -5 19 8 27.85 -22.14 31.91 o
 -4 19 8 29.09 10.31 37.63 o
 -3 19 8 446.19 382.96 66.78 o
 -2 19 8 223.69 194.52 34.73 o
 -1 19 8 469.96 415.46 48.26 o
 0 19 8 101.31 128.56 30.16 o
 1 19 8 38.32 32.71 37.57 o
 2 19 8 0.35 -10.23 55.23 o
 3 19 8 118.18 70.92 61.37 o
 4 19 8 21.91 -64.10 64.10 o
 -7 20 8 20.21 -0.23 39.65 o
 -6 20 8 17.63 30.32 37.20 o
 -5 20 8 81.19 52.12 36.24 o
 -4 20 8 66.68 112.35 34.89 o
 -3 20 8 212.18 150.24 34.37 o
 -2 20 8 114.49 156.70 33.33 o
 -1 20 8 83.19 134.02 30.77 o
 0 20 8 22.99 74.29 50.46 o
 1 20 8 538.32 524.88 58.40 o
 2 20 8 348.08 462.94 84.55 o
 3 20 8 44.44 73.64 68.87 o
 4 20 8 70.58 11.59 68.87 o
 -6 21 8 35.03 24.79 38.59 o
 -5 21 8 66.33 133.17 40.64 o
 -4 21 8 23.58 3.09 37.52 o
 -3 21 8 367.62 341.04 61.02 o
 -2 21 8 194.10 227.61 36.03 o
 -1 21 8 270.52 274.58 37.37 o
 0 21 8 473.49 498.61 78.42 o
 1 21 8 39.47 22.43 52.16 o
 2 21 8 25.98 30.69 62.05 o
 3 21 8 3.57 101.60 69.55 o
 -6 22 8 73.72 21.61 38.95 o
 -5 22 8 268.21 260.90 46.41 o
 -4 22 8 197.68 294.06 44.09 o
 -3 22 8 89.33 84.60 35.21 o
 -2 22 8 270.44 183.90 36.27 o
 -1 22 8 31.53 26.27 29.68 o
 0 22 8 4.38 -31.86 38.87 o
 1 22 8 99.04 94.02 42.17 o
 2 22 8 167.81 196.39 70.92 o
 3 22 8 6.72 -7.50 64.78 o
 -6 23 8 131.05 159.67 45.05 o
 -5 23 8 47.99 80.38 39.21 o
 -4 23 8 137.25 63.12 37.62 o
 -3 23 8 88.96 83.01 35.64 o
 -2 23 8 21.53 74.99 33.81 o
 -1 23 8 102.28 123.88 44.66 o
 0 23 8 183.62 218.87 49.34 o
 1 23 8 163.47 164.24 64.10 o
 2 23 8 30.17 -20.46 62.05 o
 3 23 8 39.45 -67.51 67.51 o
 -5 24 8 110.07 59.83 40.40 o
 -4 24 8 113.61 41.49 37.86 o
 -3 24 8 84.59 96.20 38.22 o
 -2 24 8 396.16 400.55 51.34 o
 -1 24 8 527.31 393.39 59.29 o
 0 24 8 34.58 4.63 41.24 o
 1 24 8 10.74 28.48 42.65 o
 2 24 8 28.93 50.46 64.78 o
 -5 25 8 88.39 33.21 39.63 o
 -4 25 8 32.66 23.73 38.87 o
 -3 25 8 12.02 20.18 37.71 o
 -2 25 8 9.19 -39.74 43.41 o
 -1 25 8 44.86 33.48 43.24 o
 0 25 8 177.09 209.35 82.17 o
 1 25 8 26.53 50.12 45.32 o
 2 25 8 77.91 68.87 69.55 o
 -5 26 8 50.61 89.55 43.23 o
 -4 26 8 75.29 86.97 42.31 o
 -3 26 8 39.79 18.40 41.15 o
 -2 26 8 213.07 144.61 51.75 o
 -1 26 8 107.58 49.49 59.67 o
 0 26 8 72.20 94.10 99.22 o
 1 26 8 100.64 64.15 64.78 o
 -4 27 8 31.67 53.08 48.51 o
 -3 27 8 155.17 75.71 51.76 o
 -2 27 8 21.92 29.28 45.71 o
 -1 27 8 52.75 47.26 47.55 o
 0 27 8 35.05 73.78 49.41 o
 1 27 8 50.10 77.46 68.19 o
 -3 28 8 0.63 18.91 52.38 o
 -2 28 8 64.96 57.36 50.74 o
 -1 28 8 13.75 62.09 48.61 o
 0 28 8 4.46 4.83 56.26 o
 0 -26 9 8.03 -57.96 57.96 o
 -1 -25 9 116.06 184.79 68.87 o
 0 -25 9 22.20 -45.00 58.64 o
 1 -25 9 82.76 73.64 67.51 o
 -1 -24 9 215.70 225.71 71.60 o
 0 -24 9 74.99 93.42 66.14 o
 1 -24 9 5.45 17.05 64.78 o
 -2 -23 9 306.95 408.39 74.33 o
 -1 -23 9 11.38 68.87 55.92 o
 0 -23 9 102.75 69.55 61.37 o
 1 -23 9 67.15 100.92 69.55 o
 2 -23 9 15.74 23.18 74.33 o
 -2 -22 9 162.86 175.93 61.37 o
 -1 -22 9 80.40 135.70 59.32 o
 0 -22 9 39.92 98.19 60.69 o
 1 -22 9 26.73 38.87 62.05 o
 2 -22 9 49.00 53.87 70.23 o
 -3 -21 9 328.28 250.25 64.10 o
 -2 -21 9 50.29 57.96 51.82 o
 -1 -21 9 19.94 35.46 53.19 o
 0 -21 9 165.56 197.75 65.46 o
 1 -21 9 242.18 234.57 68.87 o
 2 -21 9 25.42 89.33 70.23 o
 -3 -20 9 60.23 75.01 51.14 o
 -2 -20 9 6.83 -17.05 47.73 o
 -1 -20 9 35.57 71.60 54.55 o
 0 -20 9 74.50 115.24 59.32 o
 1 -20 9 66.12 129.56 60.69 o
 2 -20 9 85.09 68.19 62.05 o
 3 -20 9 57.50 1.36 66.83 o
 -3 -19 9 432.95 296.62 65.46 o
 -2 -19 9 555.45 592.50 80.46 o
 -1 -19 9 57.46 175.93 59.32 o
 0 -19 9 218.42 190.25 60.69 o
 1 -19 9 3.51 -8.86 53.87 o
 2 -19 9 6.18 -27.28 56.60 o
 3 -19 9 8.17 -27.28 66.83 o
 -4 -18 9 16.99 44.32 45.69 o
 -3 -18 9 15.11 -41.60 41.60 o
 -2 -18 9 67.03 24.55 46.37 o
 -1 -18 9 742.26 816.16 88.65 o
 0 -18 9 109.02 152.06 58.64 o
 1 -18 9 93.34 60.01 61.37 o
 2 -18 9 267.40 258.44 78.42 o
 3 -18 9 23.71 -65.46 65.46 o
 -4 -17 9 190.60 209.34 54.55 o
 -3 -17 9 64.49 4.09 42.96 o
 -2 -17 9 68.09 34.09 45.69 o
 -1 -17 9 402.65 458.85 72.28 o
 0 -17 9 136.42 193.66 60.01 o
 1 -17 9 73.85 45.00 57.28 o
 2 -17 9 40.20 130.24 66.83 o
 3 -17 9 216.47 233.21 84.55 o
 -5 -16 9 44.46 16.37 45.00 o
 -4 -16 9 129.40 165.70 51.82 o
 -3 -16 9 52.00 28.64 44.32 o
 -2 -16 9 4.42 77.05 45.69 o
 -1 -16 9 231.29 259.80 60.01 o
 0 -16 9 270.19 305.49 66.14 o
 1 -16 9 126.35 152.06 60.69 o
 2 -16 9 158.16 116.60 59.32 o
 3 -16 9 127.31 139.11 75.01 o
 4 -16 9 1.34 -72.28 72.28 o
 -5 -15 9 103.15 124.79 52.51 o
 -4 -15 9 246.76 308.22 57.96 o
 -3 -15 9 19.68 57.28 44.32 o
 -2 -15 9 279.45 237.30 53.87 o
 -1 -15 9 113.30 89.33 48.41 o
 0 -15 9 33.14 104.33 49.10 o
 1 -15 9 478.66 382.47 73.64 o
 2 -15 9 74.66 12.96 59.32 o
 3 -15 9 117.09 10.23 65.46 o
 4 -15 9 82.55 76.37 74.33 o
 -5 -14 9 145.76 160.24 51.14 o
 -4 -14 9 352.64 372.25 61.37 o
 -3 -14 9 118.15 66.14 45.69 o
 -2 -14 9 929.44 1074.53 96.83 o
 -1 -14 9 213.66 187.52 50.46 o
 0 -14 9 945.44 1049.30 100.92 o
 1 -14 9 738.67 732.97 92.74 o
 2 -14 9 52.68 68.87 55.92 o
 3 -14 9 141.32 192.98 77.05 o
 4 -14 9 36.94 91.37 78.42 o
 -6 -13 9 127.83 192.98 56.60 o
 -5 -13 9 566.26 798.43 85.24 o
 -4 -13 9 44.36 0.68 38.19 o
 -3 -13 9 125.69 288.44 55.92 o
 -2 -13 9 668.06 795.70 84.55 o
 -1 -13 9 51.73 122.06 45.69 o
 0 -13 9 326.82 345.65 63.42 o
 1 -13 9 505.64 713.19 86.60 o
 2 -13 9 193.50 126.83 60.69 o
 3 -13 9 53.00 133.65 71.60 o
 4 -13 9 151.99 49.78 65.46 o
 -6 -12 9 757.75 777.29 87.28 o
 -5 -12 9 31.68 49.78 44.32 o
 -4 -12 9 46.79 67.51 43.64 o
 -3 -12 9 566.02 413.16 63.42 o
 -2 -12 9 559.76 654.55 75.01 o
 -1 -12 9 724.55 930.72 91.37 o
 0 -12 9 672.81 805.93 83.19 o
 1 -12 9 68.63 124.10 57.28 o
 2 -12 9 140.04 159.56 63.42 o
 3 -12 9 143.67 -6.14 57.96 o
 4 -12 9 50.74 39.55 71.60 o
 -6 -11 9 185.68 113.19 48.41 o
 -5 -11 9 80.90 97.51 45.00 o
 -4 -11 9 374.37 507.26 68.87 o
 -3 -11 9 80.90 104.33 47.05 o
 -2 -11 9 868.75 932.08 88.65 o
 -1 -11 9 192.27 190.93 52.51 o
 0 -11 9 1592.15 1615.95 117.97 o
 1 -11 9 151.44 162.97 56.60 o
 2 -11 9 131.80 206.61 65.46 o
 3 -11 9 17.66 57.96 55.23 o
 4 -11 9 80.51 156.84 79.78 o
 -7 -10 9 73.42 34.78 49.10 o
 -6 -10 9 826.49 964.81 95.46 o
 -5 -10 9 21.61 77.05 44.32 o
 -4 -10 9 64.35 87.28 44.32 o
 -3 -10 9 388.54 340.26 55.23 o
 -2 -10 9 373.40 366.79 57.28 o
 -1 -10 9 855.26 985.95 89.33 o
 0 -10 9 666.09 546.81 71.60 o
 1 -10 9 5.50 79.78 47.05 o
 2 -10 9 1553.90 1339.10 112.51 o
 3 -10 9 487.55 384.52 77.74 o
 4 -10 9 69.87 83.19 68.19 o
 5 -10 9 27.56 34.09 83.19 o
 -7 -9 9 10.22 0.68 46.37 o
 -6 -9 9 345.69 387.25 67.51 o
 -5 -9 9 77.69 105.69 47.73 o
 -4 -9 9 136.69 146.61 48.41 o
 -3 -9 9 147.71 182.07 49.10 o
 -2 -9 9 2665.69 2654.34 154.11 o
 -1 -9 9 1391.62 1367.74 102.28 o
 0 -9 9 180.02 207.30 52.51 o
 1 -9 9 361.85 297.31 63.42 o
 2 -9 9 136.98 109.78 51.82 o
 3 -9 9 189.39 211.39 70.23 o
 4 -9 9 132.79 229.80 77.05 o
 5 -9 9 8.46 -68.19 70.92 o
 -8 -8 9 14.20 -34.78 51.14 o
 -7 -8 9 868.84 897.98 98.19 o
 -6 -8 9 216.13 213.43 57.96 o
 -5 -8 9 168.95 117.29 50.46 o
 -4 -8 9 584.17 649.78 79.78 o
 -3 -8 9 111.10 156.15 46.37 o
 -2 -8 9 73.45 248.89 49.78 o
 -1 -8 9 117.46 113.88 41.60 o
 0 -8 9 501.95 495.67 66.83 o
 1 -8 9 509.87 404.98 63.42 o
 2 -8 9 88.45 205.93 61.37 o
 3 -8 9 134.64 145.24 62.73 o
 4 -8 9 39.24 121.38 70.23 o
 5 -8 9 28.93 113.88 78.42 o
 -8 -7 9 148.97 132.97 58.64 o
 -7 -7 9 124.41 158.88 55.92 o
 -6 -7 9 224.41 224.34 57.96 o
 -5 -7 9 479.93 526.35 70.23 o
 -4 -7 9 453.41 521.36 64.10 o
 -3 -7 9 131.59 98.19 41.60 o
 -2 -7 9 903.50 852.30 79.78 o
 -1 -7 9 755.19 719.33 74.33 o
 0 -7 9 294.77 240.71 51.14 o
 1 -7 9 163.15 100.32 29.60 o
 2 -7 9 523.63 535.22 78.42 o
 3 -7 9 103.23 62.05 53.19 o
 4 -7 9 221.19 72.28 61.37 o
 5 -7 9 63.54 55.63 49.86 o
 -8 -6 9 7.78 33.41 52.51 o
 -7 -6 9 353.47 353.15 69.55 o
 -6 -6 9 91.77 146.61 54.55 o
 -5 -6 9 322.73 429.95 43.73 o
 -4 -6 9 1183.69 1189.90 65.32 o
 -3 -6 9 139.26 227.07 49.78 o
 -2 -6 9 48.61 190.25 47.73 o
 -1 -6 9 119.59 141.15 47.05 o
 0 -6 9 1130.49 1058.84 85.92 o
 1 -6 9 834.33 720.69 82.85 o
 2 -6 9 672.97 631.87 95.12 o
 3 -6 9 9.39 -34.84 34.84 o
 4 -6 9 45.02 93.60 43.79 o
 5 -6 9 2.15 56.46 50.14 o
 -9 -5 9 81.26 124.10 64.10 o
 -8 -5 9 3.80 65.46 54.55 o
 -7 -5 9 20.89 12.27 49.10 o
 -6 -5 9 22.00 17.73 44.32 o
 -5 -5 9 570.84 623.95 50.78 o
 -4 -5 9 120.27 167.78 38.87 o
 -3 -5 9 1389.34 1309.78 100.92 o
 -2 -5 9 617.76 580.22 67.51 o
 -1 -5 9 25.84 21.14 32.73 o
 0 -5 9 130.81 163.34 27.23 o
 1 -5 9 302.84 328.01 38.06 o
 2 -5 9 267.91 319.04 40.98 o
 3 -5 9 17.81 0.30 34.84 o
 4 -5 9 257.93 297.89 51.82 o
 5 -5 9 38.62 6.40 47.40 o
 -9 -4 9 35.24 27.28 60.01 o
 -8 -4 9 245.67 320.49 72.96 o
 -7 -4 9 167.59 218.89 64.78 o
 -6 -4 9 358.25 570.68 78.42 o
 -5 -4 9 386.85 383.09 42.71 o
 -4 -4 9 767.61 857.68 59.79 o
 -3 -4 9 2083.52 2111.33 91.13 o
 -2 -4 9 312.24 353.15 56.60 o
 -1 -4 9 586.19 707.05 75.01 o
 0 -4 9 319.54 310.45 31.46 o
 1 -4 9 125.29 146.40 31.71 o
 2 -4 9 230.53 339.94 41.95 o
 3 -4 9 61.52 91.91 43.64 o
 4 -4 9 61.99 31.77 39.02 o
 5 -4 9 11.19 14.16 70.92 o
 -9 -3 9 2.86 -12.96 57.96 o
 -8 -3 9 491.92 529.76 84.55 o
 -7 -3 9 163.67 215.48 64.10 o
 -6 -3 9 463.76 494.88 49.90 o
 -5 -3 9 1457.48 1434.49 74.51 o
 -4 -3 9 192.88 227.09 34.47 o
 -3 -3 9 2134.67 2268.28 149.98 o
 -2 -3 9 564.83 531.13 62.05 o
 -1 -3 9 245.18 196.39 44.32 o
 0 -3 9 131.12 113.74 25.10 o
 1 -3 9 240.48 266.63 35.14 o
 2 -3 9 86.92 95.17 34.27 o
 3 -3 9 85.68 27.14 43.30 o
 4 -3 9 24.62 8.12 46.03 o
 5 -3 9 27.81 65.34 49.34 o
 -9 -2 9 13.19 -15.00 60.01 o
 -8 -2 9 6.89 60.69 57.28 o
 -7 -2 9 9.46 23.18 52.51 o
 -6 -2 9 12.87 57.91 85.58 o
 -5 -2 9 426.66 540.01 49.34 o
 -4 -2 9 2151.69 2257.49 98.01 o
 -3 -2 9 361.94 388.30 40.49 o
 -2 -2 9 363.55 385.20 55.23 o
 -1 -2 9 925.23 915.03 73.64 o
 0 -2 9 236.21 188.50 45.35 o
 1 -2 9 42.79 119.05 29.33 o
 2 -2 9 157.31 205.24 37.18 o
 3 -2 9 568.52 453.69 51.10 o
 4 -2 9 5.21 17.90 39.89 o
 5 -2 9 133.09 118.80 58.64 o
 -9 -1 9 9.30 71.60 64.78 o
 -8 -1 9 49.11 107.06 61.37 o
 -7 -1 9 38.47 40.21 47.73 o
 -6 -1 9 492.62 535.02 51.82 o
 -5 -1 9 201.23 165.87 36.60 o
 -4 -1 9 179.01 213.61 36.08 o
 -3 -1 9 373.41 524.83 45.80 o
 -2 -1 9 578.87 658.21 123.76 o
 -1 -1 9 447.58 531.98 35.06 o
 0 -1 9 245.38 267.49 30.74 o
 1 -1 9 558.84 446.21 41.39 o
 2 -1 9 66.08 61.05 32.27 o
 3 -1 9 474.34 434.30 51.05 o
 4 -1 9 2.97 -7.92 37.86 o
 5 -1 9 49.59 61.06 46.99 o
 -9 0 9 3.99 -15.00 60.69 o
 -8 0 9 103.95 92.06 60.01 o
 -7 0 9 0.12 -3.17 33.38 o
 -6 0 9 426.16 465.40 152.37 o
 -5 0 9 5.77 26.79 30.27 o
 -4 0 9 4559.89 4577.52 169.72 o
 -3 0 9 386.68 371.13 44.97 o
 -2 0 9 935.43 1022.24 78.04 o
 -1 0 9 237.49 202.20 58.64 o
 0 0 9 113.44 172.72 27.32 o
 1 0 9 0.01 162.14 45.35 o
 2 0 9 20.16 51.96 30.09 o
 3 0 9 15.05 54.39 34.71 o
 4 0 9 6.98 20.62 37.79 o
 5 0 9 103.11 149.93 49.86 o
 -9 1 9 9.30 47.05 64.10 o
 -8 1 9 49.11 127.51 61.37 o
 -7 1 9 38.46 58.15 37.33 o
 -6 1 9 492.62 625.61 56.99 o
 -5 1 9 201.23 249.50 59.32 o
 -4 1 9 179.01 201.33 35.32 o
 -3 1 9 373.41 367.07 41.21 o
 -2 1 9 578.87 602.77 49.55 o
 -1 1 9 447.58 514.44 57.62 o
 0 1 9 245.38 272.99 32.39 o
 1 1 9 558.84 606.06 63.42 o
 2 1 9 66.08 64.26 31.06 o
 3 1 9 474.34 473.11 55.57 o
 4 1 9 2.97 -36.04 46.37 o
 5 1 9 49.59 89.33 46.70 o
 -9 2 9 13.19 31.37 64.10 o
 -8 2 9 6.89 47.96 58.98 o
 -7 2 9 9.46 3.22 34.41 o
 -6 2 9 12.87 0.68 31.45 o
 -5 2 9 426.66 459.43 63.08 o
 -4 2 9 2151.69 2231.41 99.50 o
 -3 2 9 361.94 296.46 38.81 o
 -2 2 9 363.55 410.45 26.58 o
 -1 2 9 925.23 790.68 54.89 o
 0 2 9 236.21 207.24 29.98 o
 1 2 9 42.79 135.34 51.82 o
 2 2 9 157.31 280.64 53.53 o
 3 2 9 568.52 633.98 62.73 o
 4 2 9 5.21 13.72 38.01 o
 5 2 9 133.09 120.71 53.19 o
 -9 3 9 2.86 -58.64 63.42 o
 -8 3 9 491.92 486.17 60.27 o
 -7 3 9 163.67 285.33 47.86 o
 -6 3 9 463.76 518.48 54.38 o
 -5 3 9 1457.48 1470.80 79.67 o
 -4 3 9 192.88 168.47 36.77 o
 -3 3 9 2134.67 2294.80 177.60 o
 -2 3 9 564.83 525.43 62.62 o
 -1 3 9 245.18 315.73 26.91 o
 0 3 9 131.12 134.72 26.31 o
 1 3 9 240.48 204.26 34.41 o
 2 3 9 86.92 81.02 47.05 o
 3 3 9 85.68 42.56 34.41 o
 4 3 9 24.62 56.98 40.01 o
 5 3 9 27.81 31.43 42.67 o
 -9 4 9 35.24 19.09 67.51 o
 -8 4 9 245.67 328.41 56.11 o
 -7 4 9 167.59 191.41 44.65 o
 -6 4 9 358.25 418.82 50.67 o
 -5 4 9 386.85 403.56 48.21 o
 -4 4 9 767.61 839.92 73.30 o
 -3 4 9 2083.52 2121.81 72.14 o
 -2 4 9 312.24 390.56 36.28 o
 -1 4 9 586.19 670.91 65.74 o
 0 4 9 319.54 325.67 34.95 o
 1 4 9 125.29 174.83 71.94 o
 2 4 9 230.53 435.83 45.29 o
 3 4 9 61.52 82.18 64.44 o
 4 4 9 61.99 3.29 38.81 o
 5 4 9 11.19 5.02 41.94 o
 -9 5 9 81.26 96.26 80.12 o
 -8 5 9 3.80 12.02 44.36 o
 -7 5 9 20.89 17.73 35.68 o
 -6 5 9 22.00 14.86 34.14 o
 -5 5 9 570.84 512.83 55.68 o
 -4 5 9 120.27 145.19 24.39 o
 -3 5 9 1389.34 1353.10 53.36 o
 -2 5 9 617.76 571.69 35.44 o
 -1 5 9 25.84 17.06 18.28 o
 0 5 9 130.81 229.42 31.43 o
 1 5 9 302.84 293.75 37.13 o
 2 5 9 267.91 244.75 39.28 o
 3 5 9 17.81 -7.19 42.96 o
 4 5 9 257.93 193.79 45.81 o
 5 5 9 38.62 39.76 43.62 o
 -9 6 9 41.00 63.01 51.97 o
 -8 6 9 7.78 2.33 52.16 o
 -7 6 9 353.47 370.44 54.46 o
 -6 6 9 91.77 95.14 40.57 o
 -5 6 9 322.73 265.58 43.62 o
 -4 6 9 1183.69 1223.72 55.39 o
 -3 6 9 139.26 267.68 27.44 o
 -2 6 9 48.61 123.26 27.93 o
 -1 6 9 119.59 157.97 24.35 o
 0 6 9 1130.49 1068.88 58.53 o
 1 6 9 834.33 672.58 51.82 o
 2 6 9 672.97 698.99 81.83 o
 3 6 9 9.39 9.67 33.99 o
 4 6 9 45.02 68.28 40.21 o
 5 6 9 2.15 42.28 64.10 o
 -8 7 9 148.97 239.13 55.13 o
 -7 7 9 124.41 201.17 51.05 o
 -6 7 9 224.41 233.51 47.73 o
 -5 7 9 479.93 518.04 47.76 o
 -4 7 9 453.41 478.67 37.70 o
 -3 7 9 131.59 76.18 21.47 o
 -2 7 9 903.50 758.36 51.71 o
 -1 7 9 755.19 689.10 51.22 o
 0 7 9 294.76 268.52 34.56 o
 1 7 9 163.15 157.84 33.51 o
 2 7 9 523.63 592.90 109.78 o
 3 7 9 103.22 112.13 47.73 o
 4 7 9 221.19 236.10 111.15 o
 5 7 9 63.54 154.11 71.60 o
 -8 8 9 14.20 25.99 44.46 o
 -7 8 9 868.84 985.48 80.99 o
 -6 8 9 216.13 209.44 45.20 o
 -5 8 9 168.95 189.84 30.53 o
 -4 8 9 584.16 727.28 45.26 o
 -3 8 9 111.10 213.05 27.21 o
 -2 8 9 73.45 150.19 23.89 o
 -1 8 9 117.46 123.34 23.85 o
 0 8 9 501.96 571.25 46.22 o
 1 8 9 509.87 558.65 47.48 o
 2 8 9 88.45 97.80 34.95 o
 3 8 9 134.64 120.19 38.91 o
 4 8 9 39.24 5.26 38.81 o
 5 8 9 28.93 28.64 62.05 o
 -8 9 9 189.96 180.32 55.69 o
 -7 9 9 10.22 34.20 43.39 o
 -6 9 9 345.69 390.99 145.21 o
 -5 9 9 77.69 127.36 29.53 o
 -4 9 9 136.69 148.40 28.20 o
 -3 9 9 147.70 217.86 27.75 o
 -2 9 9 2665.69 2607.52 113.79 o
 -1 9 9 1391.63 1307.35 56.74 o
 0 9 9 180.02 134.74 26.47 o
 1 9 9 361.85 360.55 41.94 o
 2 9 9 136.98 105.85 43.30 o
 3 9 9 189.39 213.43 42.23 o
 4 9 9 132.79 78.42 62.73 o
 5 9 9 8.46 27.28 65.46 o
 -8 10 9 82.13 126.21 60.69 o
 -7 10 9 73.42 172.84 100.24 o
 -6 10 9 826.49 772.09 72.79 o
 -5 10 9 21.61 72.74 28.50 o
 -4 10 9 64.35 76.85 25.95 o
 -3 10 9 388.54 331.82 70.96 o
 -2 10 9 373.41 416.01 71.64 o
 -1 10 9 855.26 680.28 43.44 o
 0 10 9 666.09 633.46 42.17 o
 1 10 9 5.50 35.66 29.40 o
 2 10 9 1553.90 1415.12 77.62 o
 3 10 9 487.55 471.44 51.84 o
 4 10 9 69.87 42.96 61.37 o
 5 10 9 27.56 39.55 72.28 o
 -8 11 9 449.63 431.36 67.98 o
 -7 11 9 26.69 47.51 45.55 o
 -6 11 9 185.68 129.57 43.15 o
 -5 11 9 80.90 88.02 30.84 o
 -4 11 9 374.37 371.62 37.58 o
 -3 11 9 80.90 134.78 27.36 o
 -2 11 9 868.75 784.60 51.55 o
 -1 11 9 192.27 305.39 32.01 o
 0 11 9 1592.15 1608.90 66.83 o
 1 11 9 151.44 134.50 65.12 o
 2 11 9 131.80 182.05 36.79 o
 3 11 9 17.66 21.09 36.41 o
 4 11 9 80.51 68.87 62.73 o
 -8 12 9 93.46 161.56 149.68 o
 -7 12 9 38.78 10.24 44.99 o
 -6 12 9 757.75 799.89 56.68 o
 -5 12 9 31.68 33.79 29.48 o
 -4 12 9 46.79 90.21 26.96 o
 -3 12 9 566.02 594.89 42.95 o
 -2 12 9 559.76 604.69 42.02 o
 -1 12 9 724.55 755.55 100.95 o
 0 12 9 672.81 749.36 47.24 o
 1 12 9 68.63 140.45 34.95 o
 2 12 9 140.04 193.72 40.00 o
 3 12 9 143.67 181.38 68.19 o
 4 12 9 50.74 14.32 60.69 o
 -8 13 9 201.27 227.61 61.94 o
 -7 13 9 1.98 85.58 48.70 o
 -6 13 9 127.82 103.83 35.04 o
 -5 13 9 566.26 623.54 65.97 o
 -4 13 9 44.36 54.16 27.75 o
 -3 13 9 125.69 265.07 32.47 o
 -2 13 9 668.06 631.20 44.17 o
 -1 13 9 51.73 168.61 29.15 o
 0 13 9 326.82 404.39 36.96 o
 1 13 9 505.65 595.19 59.32 o
 2 13 9 193.50 153.89 51.82 o
 3 13 9 53.00 21.82 55.23 o
 4 13 9 151.99 139.79 72.28 o
 -8 14 9 56.17 103.21 55.43 o
 -7 14 9 84.95 110.28 53.49 o
 -6 14 9 44.75 55.17 34.67 o
 -5 14 9 145.76 65.86 30.80 o
 -4 14 9 352.64 334.80 41.92 o
 -3 14 9 118.15 136.31 28.43 o
 -2 14 9 929.43 994.13 83.88 o
 -1 14 9 213.66 237.11 35.40 o
 0 14 9 945.44 1063.51 57.62 o
 1 14 9 738.67 823.26 70.92 o
 2 14 9 52.68 94.10 57.28 o
 3 14 9 141.32 156.15 63.42 o
 4 14 9 36.94 97.51 71.60 o
 -8 15 9 94.16 10.04 72.96 o
 -7 15 9 67.47 175.75 57.32 o
 -6 15 9 177.48 244.86 39.84 o
 -5 15 9 103.15 128.75 34.64 o
 -4 15 9 246.76 307.69 43.99 o
 -3 15 9 19.68 46.50 26.58 o
 -2 15 9 279.45 238.27 32.76 o
 -1 15 9 113.30 55.43 27.48 o
 0 15 9 33.14 68.92 28.61 o
 1 15 9 478.67 617.26 84.55 o
 2 15 9 74.66 104.33 57.28 o
 3 15 9 117.09 134.33 65.46 o
 4 15 9 82.55 96.15 66.14 o
 -7 16 9 138.75 199.25 58.29 o
 -6 16 9 234.24 355.72 48.29 o
 -5 16 9 44.46 67.06 50.04 o
 -4 16 9 129.40 160.38 46.96 o
 -3 16 9 52.00 48.70 28.54 o
 -2 16 9 4.42 26.44 26.58 o
 -1 16 9 231.29 213.93 33.40 o
 0 16 9 270.19 266.53 48.66 o
 1 16 9 126.35 99.99 42.28 o
 2 16 9 158.16 119.33 59.32 o
 3 16 9 127.31 195.02 69.55 o
 4 16 9 1.34 82.51 70.23 o
 -7 17 9 17.04 133.32 56.40 o
 -6 17 9 39.67 91.38 37.13 o
 -5 17 9 485.62 524.58 50.98 o
 -4 17 9 190.60 223.32 44.92 o
 -3 17 9 64.49 37.17 28.56 o
 -2 17 9 68.09 79.31 31.87 o
 -1 17 9 402.65 358.72 43.35 o
 0 17 9 136.43 143.02 31.87 o
 1 17 9 73.85 118.65 56.60 o
 2 17 9 40.20 87.28 59.32 o
 3 17 9 216.47 209.34 73.64 o
 -7 18 9 174.32 257.40 49.82 o
 -6 18 9 210.70 156.66 44.96 o
 -5 18 9 82.44 89.68 35.68 o
 -4 18 9 16.99 37.09 38.32 o
 -3 18 9 15.11 -13.20 27.60 o
 -2 18 9 67.03 40.86 40.49 o
 -1 18 9 742.26 711.72 50.24 o
 0 18 9 109.02 47.82 29.17 o
 1 18 9 93.34 62.05 50.46 o
 2 18 9 267.40 372.25 75.69 o
 3 18 9 23.71 87.96 66.14 o
 -7 19 9 59.41 66.97 61.27 o
 -6 19 9 89.43 50.92 39.38 o
 -5 19 9 85.85 114.42 38.27 o
 -4 19 9 26.92 37.74 54.43 o
 -3 19 9 432.95 441.42 45.82 o
 -2 19 9 555.46 528.73 46.78 o
 -1 19 9 57.46 6.58 28.38 o
 0 19 9 218.42 238.87 38.30 o
 1 19 9 3.51 85.24 55.23 o
 2 19 9 6.18 80.46 62.05 o
 3 19 9 8.17 115.24 66.83 o
 -6 20 9 147.13 149.25 42.88 o
 -5 20 9 202.07 342.28 46.47 o
 -4 20 9 71.17 66.67 53.08 o
 -3 20 9 60.23 57.73 39.43 o
 -2 20 9 6.83 47.29 30.90 o
 -1 20 9 35.57 78.50 31.38 o
 0 20 9 74.50 101.15 41.94 o
 1 20 9 66.12 47.05 55.92 o
 2 20 9 85.09 10.23 59.32 o
 3 20 9 57.50 86.60 70.92 o
 -6 21 9 399.38 418.75 55.86 o
 -5 21 9 41.26 65.08 39.31 o
 -4 21 9 25.61 -32.95 32.95 o
 -3 21 9 328.28 325.10 44.05 o
 -2 21 9 50.29 59.21 32.87 o
 -1 21 9 19.94 32.16 30.72 o
 0 21 9 165.55 117.11 44.39 o
 1 21 9 242.18 291.17 73.64 o
 2 21 9 25.42 71.60 63.42 o
 -6 22 9 4.42 -26.21 39.70 o
 -5 22 9 1.25 -4.63 37.31 o
 -4 22 9 212.03 218.85 44.53 o
 -3 22 9 115.08 137.24 37.53 o
 -2 22 9 162.86 145.05 39.65 o
 -1 22 9 80.40 80.97 42.62 o
 0 22 9 39.92 45.08 62.39 o
 1 22 9 26.73 19.09 60.01 o
 2 22 9 49.00 77.05 64.10 o
 -5 23 9 8.12 27.01 40.92 o
 -4 23 9 5.17 87.73 39.48 o
 -3 23 9 10.82 -21.73 33.74 o
 -2 23 9 306.95 342.56 44.68 o
 -1 23 9 11.38 -29.89 38.82 o
 0 23 9 102.75 77.00 45.05 o
 1 23 9 67.15 149.33 64.78 o
 2 23 9 15.74 60.01 68.87 o
 -5 24 9 4.26 -0.43 48.44 o
 -4 24 9 144.34 192.31 44.19 o
 -3 24 9 42.19 -19.81 35.93 o
 -2 24 9 2.14 29.16 42.01 o
 -1 24 9 215.70 182.70 50.92 o
 0 24 9 74.99 90.88 46.17 o
 1 24 9 5.45 91.37 63.42 o
 -4 25 9 36.10 73.03 40.07 o
 -3 25 9 15.24 -26.06 36.97 o
 -2 25 9 24.32 -21.39 77.74 o
 -1 25 9 116.06 72.70 47.96 o
 0 25 9 22.20 0.17 50.12 o
 1 25 9 82.76 73.64 67.51 o
 -4 26 9 98.02 89.96 44.21 o
 -3 26 9 48.77 22.68 40.25 o
 -2 26 9 19.04 8.90 47.02 o
 -1 26 9 74.61 85.33 54.21 o
 0 26 9 8.03 43.02 72.96 o
 -3 27 9 35.38 51.29 53.74 o
 -2 27 9 41.26 -1.95 49.48 o
 -1 27 9 84.11 116.06 63.76 o
 -1 -25 10 67.89 220.25 72.96 o
 -1 -24 10 101.11 88.65 66.83 o
 0 -24 10 12.17 -25.23 61.37 o
 -2 -23 10 61.60 142.52 63.42 o
 -1 -23 10 144.04 195.70 70.23 o
 0 -23 10 53.53 139.79 70.92 o
 -2 -22 10 1.49 32.73 58.64 o
 -1 -22 10 32.78 12.96 58.64 o
 0 -22 10 97.36 70.23 69.55 o
 1 -22 10 141.31 66.83 66.83 o
 -3 -21 10 9.98 5.46 53.87 o
 -2 -21 10 129.40 171.84 60.69 o
 -1 -21 10 224.16 207.98 68.19 o
 0 -21 10 98.36 201.84 71.60 o
 1 -21 10 57.54 144.56 70.23 o
 -3 -20 10 56.06 78.42 55.23 o
 -2 -20 10 9.10 -7.50 52.51 o
 -1 -20 10 21.24 77.05 56.60 o
 0 -20 10 271.82 287.76 77.05 o
 1 -20 10 194.12 228.43 75.69 o
 2 -20 10 186.75 240.71 79.78 o
 -3 -19 10 96.91 235.25 62.05 o
 -2 -19 10 345.15 524.99 78.42 o
 -1 -19 10 21.27 8.18 56.60 o
 0 -19 10 38.26 81.15 55.23 o
 1 -19 10 38.49 79.10 62.05 o
 2 -19 10 104.30 237.98 81.15 o
 -4 -18 10 82.24 68.87 53.87 o
 -3 -18 10 14.80 -28.64 49.10 o
 -2 -18 10 19.38 -42.96 49.78 o
 -1 -18 10 60.08 163.65 60.69 o
 0 -18 10 230.25 291.85 75.01 o
 1 -18 10 60.58 72.28 68.19 o
 2 -18 10 114.39 162.29 75.69 o
 -4 -17 10 217.77 247.53 64.10 o
 -3 -17 10 264.11 153.43 57.96 o
 -2 -17 10 594.92 650.46 84.55 o
 -1 -17 10 87.29 21.14 56.60 o
 0 -17 10 55.56 106.38 60.69 o
 1 -17 10 129.67 189.57 73.64 o
 2 -17 10 161.55 141.83 74.33 o
 3 -17 10 40.26 55.23 67.51 o
 -5 -16 10 58.63 105.01 54.55 o
 -4 -16 10 83.85 130.24 55.23 o
 -3 -16 10 452.64 476.57 73.64 o
 -2 -16 10 1113.27 1066.34 103.65 o
 -1 -16 10 120.29 162.97 54.55 o
 0 -16 10 94.37 85.92 59.32 o
 1 -16 10 54.03 140.47 64.10 o
 2 -16 10 18.35 73.64 64.10 o
 3 -16 10 1.16 106.38 76.37 o
 -5 -15 10 204.69 190.25 60.01 o
 -4 -15 10 393.03 342.24 68.19 o
 -3 -15 10 239.59 171.16 56.60 o
 -2 -15 10 102.83 -14.32 47.05 o
 -1 -15 10 127.09 188.88 61.37 o
 0 -15 10 88.24 75.69 52.51 o
 1 -15 10 114.60 66.83 59.32 o
 2 -15 10 65.78 112.51 67.51 o
 3 -15 10 44.08 19.09 70.92 o
 -5 -14 10 231.36 327.99 66.83 o
 -4 -14 10 139.33 141.83 54.55 o
 -3 -14 10 434.57 349.06 65.46 o
 -2 -14 10 261.35 216.16 58.64 o
 -1 -14 10 69.87 203.89 60.01 o
 0 -14 10 174.05 176.61 60.01 o
 1 -14 10 70.86 136.38 66.14 o
 2 -14 10 11.12 -31.37 60.01 o
 3 -14 10 23.71 -65.46 65.46 o
 -6 -13 10 83.54 117.97 56.60 o
 -5 -13 10 104.39 21.82 50.46 o
 -4 -13 10 47.81 113.19 53.19 o
 -3 -13 10 190.26 121.38 52.51 o
 -2 -13 10 476.62 501.80 73.64 o
 -1 -13 10 248.09 290.49 63.42 o
 0 -13 10 172.76 171.84 60.01 o
 1 -13 10 467.09 400.88 79.10 o
 2 -13 10 42.55 17.73 60.69 o
 3 -13 10 16.74 -53.19 59.32 o
 -6 -12 10 4.72 17.73 52.51 o
 -5 -12 10 109.80 177.97 59.32 o
 -4 -12 10 275.48 283.67 61.37 o
 -3 -12 10 1156.59 1247.05 109.78 o
 -2 -12 10 298.61 329.35 64.78 o
 -1 -12 10 55.54 152.74 51.14 o
 0 -12 10 527.34 438.39 71.60 o
 1 -12 10 62.39 12.27 53.19 o
 2 -12 10 46.34 -18.41 52.51 o
 3 -12 10 189.44 97.51 66.83 o
 4 -12 10 58.05 146.61 85.24 o
 -7 -11 10 136.61 132.29 60.01 o
 -6 -11 10 113.06 75.01 53.87 o
 -5 -11 10 345.17 425.43 70.92 o
 -4 -11 10 207.16 312.99 64.78 o
 -3 -11 10 446.66 368.15 66.14 o
 -2 -11 10 297.85 233.21 56.60 o
 -1 -11 10 1130.73 1185.67 105.69 o
 0 -11 10 168.64 240.03 56.60 o
 1 -11 10 331.56 273.44 70.92 o
 2 -11 10 170.62 127.51 57.28 o
 3 -11 10 68.01 90.69 66.83 o
 4 -11 10 7.01 38.19 76.37 o
 -7 -10 10 1.99 -8.86 52.51 o
 -6 -10 10 257.37 262.53 62.73 o
 -5 -10 10 330.56 359.97 70.92 o
 -4 -10 10 317.88 351.11 66.83 o
 -3 -10 10 122.86 187.52 55.23 o
 -2 -10 10 103.58 90.69 50.46 o
 -1 -10 10 631.15 737.74 81.83 o
 0 -10 10 237.08 242.07 62.73 o
 1 -10 10 357.63 362.70 70.92 o
 2 -10 10 65.86 12.27 54.55 o
 3 -10 10 36.14 104.33 62.73 o
 4 -10 10 43.51 2.05 72.96 o
 -7 -9 10 187.58 197.07 65.46 o
 -6 -9 10 33.70 23.18 49.10 o
 -5 -9 10 355.22 580.22 80.46 o
 -4 -9 10 325.44 409.75 70.23 o
 -3 -9 10 122.84 120.01 48.41 o
 -2 -9 10 758.48 811.38 82.51 o
 -1 -9 10 18.00 68.19 48.41 o
 0 -9 10 120.02 136.38 51.14 o
 1 -9 10 21.38 -39.55 39.55 o
 2 -9 10 188.64 125.47 62.73 o
 3 -9 10 56.09 53.87 58.64 o
 4 -9 10 101.44 -49.05 57.62 o
 -8 -8 10 67.39 81.15 57.96 o
 -7 -8 10 25.44 -6.82 52.51 o
 -6 -8 10 507.64 626.59 82.51 o
 -5 -8 10 739.17 857.07 91.37 o
 -4 -8 10 123.60 80.46 48.41 o
 -3 -8 10 332.17 278.21 60.01 o
 -2 -8 10 1217.13 1220.45 96.15 o
 -1 -8 10 94.23 152.74 47.05 o
 0 -8 10 655.77 744.56 85.24 o
 1 -8 10 276.66 192.98 61.37 o
 2 -8 10 309.55 237.30 62.05 o
 3 -8 10 33.12 -23.18 64.10 o
 4 -8 10 75.14 85.56 70.92 o
 -8 -7 10 191.78 220.25 66.83 o
 -7 -7 10 30.87 21.82 54.55 o
 -6 -7 10 80.99 15.00 51.82 o
 -5 -7 10 54.11 71.60 51.82 o
 -4 -7 10 740.48 884.35 93.42 o
 -3 -7 10 123.22 89.33 49.10 o
 -2 -7 10 946.22 1034.29 92.74 o
 -1 -7 10 362.93 284.35 56.60 o
 0 -7 10 528.99 686.60 82.51 o
 1 -7 10 37.88 161.61 57.28 o
 2 -7 10 44.74 88.65 59.32 o
 3 -7 10 130.50 71.13 81.83 o
 4 -7 10 70.62 103.12 81.15 o
 -8 -6 10 120.09 205.25 65.46 o
 -7 -6 10 111.31 34.09 55.92 o
 -6 -6 10 299.16 370.20 70.92 o
 -5 -6 10 53.93 4.09 46.37 o
 -4 -6 10 274.75 458.85 72.28 o
 -3 -6 10 103.83 180.02 54.55 o
 -2 -6 10 389.69 399.52 60.69 o
 -1 -6 10 238.54 282.30 51.82 o
 0 -6 10 544.31 554.31 75.69 o
 1 -6 10 198.21 107.74 50.46 o
 2 -6 10 197.25 134.33 62.05 o
 3 -6 10 194.92 261.84 56.26 o
 4 -6 10 40.88 121.93 49.97 o
 -8 -5 10 4.31 -11.59 53.19 o
 -7 -5 10 123.55 96.15 59.32 o
 -6 -5 10 126.94 85.24 52.51 o
 -5 -5 10 126.53 134.20 35.69 o
 -4 -5 10 197.56 219.76 37.68 o
 -3 -5 10 179.96 102.28 49.78 o
 -2 -5 10 484.18 322.54 57.96 o
 -1 -5 10 23.91 -8.86 38.87 o
 0 -5 10 80.14 94.78 48.41 o
 1 -5 10 77.21 117.29 49.10 o
 2 -5 10 602.85 595.24 129.90 o
 3 -5 10 195.82 188.16 46.97 o
 4 -5 10 28.01 36.05 45.80 o
 -8 -4 10 144.76 81.83 61.37 o
 -7 -4 10 128.20 208.66 64.10 o
 -6 -4 10 127.44 115.24 58.64 o
 -5 -4 10 15.82 57.15 33.07 o
 -4 -4 10 233.10 217.96 38.63 o
 -3 -4 10 313.81 249.57 54.55 o
 -2 -4 10 310.46 347.70 61.37 o
 -1 -4 10 27.01 26.59 42.28 o
 1 -4 10 114.25 138.42 55.92 o
 2 -4 10 13.89 12.74 32.13 o
 3 -4 10 183.51 223.92 48.76 o
 4 -4 10 8.71 46.11 43.87 o
 -8 -3 10 80.32 89.33 62.05 o
 -7 -3 10 69.46 122.06 58.64 o
 -6 -3 10 237.57 290.49 64.78 o
 -5 -3 10 306.93 338.94 45.24 o
 -4 -3 10 94.03 112.30 34.90 o
 -3 -3 10 161.64 227.65 38.54 o
 -2 -3 10 208.79 159.56 45.00 o
 -1 -3 10 389.28 327.99 55.92 o
 0 -3 10 238.14 223.66 50.46 o
 1 -3 10 5.25 -13.64 45.00 o
 2 -3 10 511.29 510.72 62.39 o
 3 -3 10 62.06 75.76 37.25 o
 4 -3 10 41.86 18.27 42.42 o
 -8 -2 10 71.51 46.37 59.32 o
 -7 -2 10 241.83 205.93 64.10 o
 -6 -2 10 214.14 286.43 43.86 o
 -5 -2 10 105.58 111.01 84.21 o
 -4 -2 10 448.07 452.98 60.69 o
 -3 -2 10 589.91 541.14 83.53 o
 -2 -2 10 17.57 -22.50 38.19 o
 -1 -2 10 371.19 440.43 64.10 o
 0 -2 10 218.27 203.89 49.78 o
 1 -2 10 62.83 81.99 29.60 o
 2 -2 10 39.11 99.45 63.42 o
 3 -2 10 206.57 293.69 48.15 o
 4 -2 10 272.99 305.68 52.76 o
 -8 -1 10 357.95 235.93 71.60 o
 -7 -1 10 308.22 467.03 83.19 o
 -6 -1 10 9.32 7.93 34.78 o
 -5 -1 10 395.58 518.00 59.67 o
 -4 -1 10 250.48 272.85 42.33 o
 -3 -1 10 446.79 388.76 44.44 o
 -2 -1 10 88.31 174.56 47.73 o
 -1 -1 10 548.96 511.35 69.55 o
 0 -1 10 7.92 25.23 42.96 o
 1 -1 10 757.92 833.91 66.48 o
 2 -1 10 180.50 178.86 38.49 o
 3 -1 10 114.84 210.41 45.62 o
 4 -1 10 31.58 -10.66 42.17 o
 -8 0 10 325.59 326.63 75.01 o
 -7 0 10 58.15 103.54 40.85 o
 -6 0 10 356.07 266.69 55.92 o
 -5 0 10 808.12 867.43 66.49 o
 -4 0 10 146.88 153.63 47.05 o
 -3 0 10 666.56 693.07 56.41 o
 -2 0 10 275.40 438.39 63.42 o
 -1 0 10 787.54 850.93 86.60 o
 0 0 10 21.29 -0.68 40.23 o
 1 0 10 590.33 562.73 48.79 o
 2 0 10 6.28 35.90 33.25 o
 3 0 10 41.15 55.19 37.60 o
 4 0 10 122.72 108.88 46.50 o
 -8 1 10 357.95 367.47 82.51 o
 -7 1 10 308.22 281.49 50.43 o
 -6 1 10 9.32 65.69 78.76 o
 -5 1 10 395.58 501.30 66.14 o
 -4 1 10 250.48 316.53 44.33 o
 -3 1 10 446.79 346.29 43.39 o
 -2 1 10 88.31 203.10 36.30 o
 -1 1 10 548.96 516.81 70.92 o
 0 1 10 7.92 11.04 34.09 o
 1 1 10 757.92 817.35 57.48 o
 2 1 10 180.50 126.32 38.54 o
 3 1 10 114.84 142.16 41.26 o
 4 1 10 31.58 37.00 42.62 o
 -8 2 10 71.51 -55.92 59.32 o
 -7 2 10 241.83 153.76 45.08 o
 -6 2 10 214.14 177.47 44.02 o
 -5 2 10 105.58 85.92 35.67 o
 -4 2 10 448.07 461.22 49.38 o
 -3 2 10 589.91 561.96 87.28 o
 -2 2 10 17.57 -8.81 27.03 o
 -1 2 10 371.19 311.62 60.01 o
 0 2 10 218.27 176.31 31.28 o
 1 2 10 62.83 38.92 29.98 o
 2 2 10 39.11 109.94 35.55 o
 3 2 10 206.57 222.31 46.28 o
 4 2 10 272.99 340.90 54.96 o
 -8 3 10 80.32 104.56 46.70 o
 -7 3 10 69.46 46.27 41.60 o
 -6 3 10 237.57 213.10 46.35 o
 -5 3 10 306.93 219.77 70.23 o
 -4 3 10 94.03 133.26 87.62 o
 -3 3 10 161.64 192.00 37.85 o
 -2 3 10 208.79 182.04 36.29 o
 -1 3 10 389.28 434.98 61.37 o
 0 3 10 238.14 302.62 36.04 o
 1 3 10 5.25 -26.95 28.14 o
 2 3 10 511.29 546.14 53.08 o
 3 3 10 62.06 88.10 41.22 o
 4 3 10 41.86 18.54 55.23 o
 -8 4 10 144.76 96.49 45.32 o
 -7 4 10 128.20 205.80 46.30 o
 -6 4 10 127.44 182.78 44.27 o
 -5 4 10 15.82 5.90 60.35 o
 -4 4 10 233.10 215.24 46.37 o
 -3 4 10 313.81 389.67 46.44 o
 -2 4 10 310.46 305.63 77.36 o
 -1 4 10 27.01 23.52 22.51 o
 0 4 10 1050.22 1034.58 88.95 o
 1 4 10 114.25 108.51 65.12 o
 2 4 10 13.89 40.33 33.23 o
 3 4 10 183.51 285.74 47.22 o
 4 4 10 8.71 79.37 44.35 o
 -8 5 10 4.31 16.42 43.00 o
 -7 5 10 123.55 148.86 45.25 o
 -6 5 10 126.94 158.16 42.71 o
 -5 5 10 126.53 125.34 38.56 o
 -4 5 10 197.56 289.38 43.75 o
 -3 5 10 179.96 159.47 36.12 o
 -2 5 10 484.18 505.06 50.10 o
 -1 5 10 23.91 17.95 20.76 o
 0 5 10 80.14 109.67 30.63 o
 1 5 10 77.21 106.38 41.25 o
 2 5 10 602.85 616.52 106.38 o
 3 5 10 195.81 264.58 47.01 o
 4 5 10 28.01 68.99 43.06 o
 -8 6 10 120.09 70.84 62.73 o
 -7 6 10 111.30 168.41 47.67 o
 -6 6 10 299.16 247.92 47.48 o
 -5 6 10 53.93 59.52 38.35 o
 -4 6 10 274.75 321.31 45.68 o
 -3 6 10 103.83 62.15 33.42 o
 -2 6 10 389.69 300.19 30.91 o
 -1 6 10 238.55 250.15 29.55 o
 0 6 10 544.31 545.36 49.10 o
 1 6 10 198.21 171.04 36.60 o
 2 6 10 197.25 198.40 39.54 o
 3 6 10 194.92 237.49 47.25 o
 4 6 10 40.88 56.05 42.91 o
 -8 7 10 191.78 205.30 52.93 o
 -7 7 10 30.87 58.84 44.36 o
 -6 7 10 80.99 166.20 43.59 o
 -5 7 10 54.11 58.79 38.35 o
 -4 7 10 740.48 704.99 62.54 o
 -3 7 10 123.22 54.03 36.15 o
 -2 7 10 946.22 900.33 103.26 o
 -1 7 10 362.93 416.10 53.62 o
 0 7 10 528.99 577.64 80.12 o
 1 7 10 37.88 70.51 32.48 o
 2 7 10 44.74 22.28 34.71 o
 3 7 10 130.50 106.47 40.36 o
 4 7 10 70.62 84.21 44.56 o
 -8 8 10 67.39 50.20 46.26 o
 -7 8 10 25.44 54.65 44.76 o
 -6 8 10 507.64 448.05 99.22 o
 -5 8 10 739.17 581.49 61.41 o
 -4 8 10 123.60 108.08 45.35 o
 -3 8 10 332.17 235.24 83.53 o
 -2 8 10 1217.13 957.15 65.42 o
 -1 8 10 94.23 147.15 28.64 o
 0 8 10 655.77 718.49 70.58 o
 1 8 10 276.67 283.35 45.00 o
 2 8 10 309.55 345.14 47.62 o
 3 8 10 33.12 49.02 37.86 o
 4 8 10 75.14 9.55 64.78 o
 -8 9 10 135.81 86.71 56.60 o
 -7 9 10 187.58 109.11 49.12 o
 -6 9 10 33.70 75.13 44.60 o
 -5 9 10 355.22 352.48 53.98 o
 -4 9 10 325.44 298.36 49.49 o
 -3 9 10 122.84 124.13 25.95 o
 -2 9 10 758.47 690.01 74.57 o
 -1 9 10 18.00 -1.12 22.78 o
 0 9 10 120.02 144.06 34.76 o
 1 9 10 21.38 -11.13 30.06 o
 2 9 10 188.64 184.10 41.46 o
 3 9 10 56.09 121.94 41.17 o
 4 9 10 101.44 77.74 63.42 o
 -8 10 10 4.55 54.98 49.60 o
 -7 10 10 1.99 44.80 58.98 o
 -6 10 10 257.37 206.31 49.90 o
 -5 10 10 330.55 249.88 47.19 o
 -4 10 10 317.88 248.91 46.38 o
 -3 10 10 122.86 139.00 29.07 o
 -2 10 10 103.58 49.55 52.61 o
 -1 10 10 631.15 600.27 48.92 o
 0 10 10 237.08 283.78 40.24 o
 1 10 10 357.64 366.91 46.03 o
 2 10 10 65.86 111.62 38.28 o
 3 10 10 36.14 65.80 40.98 o
 4 10 10 43.51 123.42 70.92 o
 -8 11 10 12.32 41.77 49.90 o
 -7 11 10 136.61 176.18 74.33 o
 -6 11 10 113.05 97.51 47.25 o
 -5 11 10 345.17 273.26 49.78 o
 -4 11 10 207.16 254.43 34.65 o
 -3 11 10 446.66 448.66 39.00 o
 -2 11 10 297.85 301.18 55.16 o
 -1 11 10 1130.73 964.84 79.69 o
 0 11 10 168.64 148.11 36.60 o
 1 11 10 331.55 352.51 66.45 o
 2 11 10 170.62 111.44 38.70 o
 3 11 10 68.01 27.96 57.96 o
 4 11 10 7.01 98.19 68.19 o
 -8 12 10 7.00 -41.39 72.96 o
 -7 12 10 66.34 81.22 51.59 o
 -6 12 10 4.72 125.21 50.12 o
 -5 12 10 109.80 155.50 48.85 o
 -4 12 10 275.48 347.05 39.12 o
 -3 12 10 1156.60 1055.61 78.76 o
 -2 12 10 298.61 265.51 51.35 o
 -1 12 10 55.54 36.98 25.92 o
 0 12 10 527.34 540.92 75.01 o
 1 12 10 62.39 92.82 34.45 o
 2 12 10 46.34 43.50 37.16 o
 3 12 10 189.44 212.75 68.19 o
 4 12 10 58.05 114.56 73.64 o
 -7 13 10 55.63 38.84 50.12 o
 -6 13 10 83.54 119.01 50.08 o
 -5 13 10 104.39 104.11 45.74 o
 -4 13 10 47.81 121.47 31.74 o
 -3 13 10 190.26 134.05 48.47 o
 -2 13 10 476.62 507.46 42.03 o
 -1 13 10 248.10 232.22 34.49 o
 0 13 10 172.76 174.48 32.92 o
 1 13 10 467.09 454.42 50.62 o
 2 13 10 42.55 -19.83 43.30 o
 3 13 10 16.74 139.79 63.42 o
 -7 14 10 1.10 19.78 50.34 o
 -6 14 10 56.48 72.05 49.41 o
 -5 14 10 231.36 242.21 39.80 o
 -4 14 10 139.33 121.71 30.84 o
 -3 14 10 434.57 332.60 72.01 o
 -2 14 10 261.35 241.09 46.54 o
 -1 14 10 69.87 139.57 31.07 o
 0 14 10 174.05 202.53 41.95 o
 1 14 10 70.86 176.96 41.21 o
 2 14 10 11.12 -50.46 50.46 o
 3 14 10 23.71 -45.00 60.69 o
 -7 15 10 37.66 37.57 49.15 o
 -6 15 10 3.31 64.53 49.89 o
 -5 15 10 204.69 242.53 56.15 o
 -4 15 10 393.03 329.21 40.92 o
 -3 15 10 239.60 217.88 72.55 o
 -2 15 10 102.83 117.36 31.00 o
 -1 15 10 127.09 179.92 44.66 o
 0 15 10 88.24 108.24 32.41 o
 1 15 10 114.60 117.42 38.79 o
 2 15 10 65.78 52.51 57.96 o
 3 15 10 44.08 8.18 59.32 o
 -7 16 10 86.03 108.54 73.30 o
 -6 16 10 29.92 23.06 49.86 o
 -5 16 10 58.63 64.93 49.63 o
 -4 16 10 83.85 196.49 39.68 o
 -3 16 10 452.63 358.92 65.97 o
 -2 16 10 1113.27 962.75 78.74 o
 -1 16 10 120.29 80.00 30.98 o
 0 16 10 94.37 86.99 32.25 o
 1 16 10 54.03 -4.77 53.87 o
 2 16 10 18.35 -3.41 60.01 o
 3 16 10 1.16 65.46 67.51 o
 -7 17 10 7.08 -19.04 53.49 o
 -6 17 10 38.31 104.83 55.35 o
 -5 17 10 137.00 64.58 36.74 o
 -4 17 10 217.77 188.80 36.93 o
 -3 17 10 264.11 268.78 83.53 o
 -2 17 10 594.92 484.86 60.30 o
 -1 17 10 87.29 64.28 31.43 o
 0 17 10 55.57 89.76 31.79 o
 1 17 10 129.67 134.33 56.60 o
 2 17 10 161.55 188.88 70.23 o
 3 17 10 40.26 4.09 63.42 o
 -6 18 10 87.24 104.57 42.14 o
 -5 18 10 14.57 14.38 35.95 o
 -4 18 10 82.24 52.96 32.15 o
 -3 18 10 14.80 10.05 50.67 o
 -2 18 10 19.38 12.74 30.11 o
 -1 18 10 60.08 14.71 29.69 o
 0 18 10 230.25 191.28 35.97 o
 1 18 10 60.58 15.68 56.60 o
 2 18 10 114.39 59.32 67.51 o
 -6 19 10 15.30 55.15 41.61 o
 -5 19 10 24.06 26.10 37.44 o
 -4 19 10 151.77 153.56 37.52 o
 -3 19 10 96.91 79.35 34.76 o
 -2 19 10 345.14 307.20 42.82 o
 -1 19 10 21.27 -2.34 28.82 o
 0 19 10 38.26 94.48 43.19 o
 1 19 10 38.49 114.56 60.69 o
 2 19 10 104.30 144.56 71.60 o
 -6 20 10 122.00 126.97 48.57 o
 -5 20 10 20.43 43.79 37.94 o
 -4 20 10 102.43 110.07 51.53 o
 -3 20 10 56.06 56.41 33.48 o
 -2 20 10 9.10 13.70 31.86 o
 -1 20 10 21.24 3.98 33.14 o
 0 20 10 271.82 290.35 51.35 o
 1 20 10 194.12 226.39 71.60 o
 2 20 10 186.75 155.47 74.33 o
 -5 21 10 0.54 -13.40 37.74 o
 -4 21 10 171.29 87.54 38.37 o
 -3 21 10 9.98 -7.61 34.14 o
 -2 21 10 129.40 61.25 46.74 o
 -1 21 10 224.16 201.12 46.55 o
 0 21 10 98.36 124.16 47.84 o
 1 21 10 57.54 75.69 64.78 o
 -5 22 10 13.32 3.39 38.90 o
 -4 22 10 54.77 22.68 43.28 o
 -3 22 10 131.18 64.68 38.14 o
 -2 22 10 1.49 -6.02 32.12 o
 -1 22 10 32.78 -40.48 75.69 o
 0 22 10 97.36 111.04 46.60 o
 1 22 10 141.31 105.69 63.42 o
 -5 23 10 14.97 38.38 44.80 o
 -4 23 10 16.27 -20.11 37.31 o
 -3 23 10 2.01 31.81 37.83 o
 -2 23 10 61.60 30.00 35.04 o
 -1 23 10 144.04 91.74 62.39 o
 0 23 10 53.53 59.29 59.32 o
 -4 24 10 22.30 -33.49 37.75 o
 -3 24 10 113.91 49.89 39.30 o
 -2 24 10 78.77 98.65 50.12 o
 -1 24 10 101.11 40.45 49.78 o
 0 24 10 12.17 53.03 46.65 o
 -3 25 10 5.46 -11.21 37.05 o
 -2 25 10 2.76 37.78 45.38 o
 -1 25 10 67.89 47.22 49.81 o
 -2 -23 11 89.56 69.55 65.46 o
 -2 -22 11 17.06 -55.92 55.92 o
 -1 -22 11 6.39 -10.91 62.05 o
 -3 -21 11 4.91 -7.50 59.32 o
 -2 -21 11 16.25 15.68 61.37 o
 -1 -21 11 65.58 83.19 66.83 o
 0 -21 11 88.75 52.51 68.87 o
 -3 -20 11 36.10 7.50 59.32 o
 -2 -20 11 75.89 17.73 59.32 o
 -1 -20 11 31.31 117.97 64.78 o
 0 -20 11 9.84 113.19 72.96 o
 1 -20 11 111.15 164.34 81.83 o
 -4 -19 11 375.57 207.98 69.55 o
 -3 -19 11 58.36 27.96 60.01 o
 -2 -19 11 3.67 79.10 60.69 o
 -1 -19 11 146.08 139.79 66.83 o
 0 -19 11 72.85 97.51 68.87 o
 1 -19 11 132.79 184.11 80.46 o
 -4 -18 11 26.55 -52.51 52.51 o
 -3 -18 11 6.58 -18.41 53.87 o
 -2 -18 11 106.61 145.92 64.10 o
 -1 -18 11 39.64 17.05 60.69 o
 0 -18 11 40.20 54.55 62.73 o
 1 -18 11 174.48 115.24 75.01 o
 -4 -17 11 154.27 16.37 59.32 o
 -3 -17 11 21.92 -30.69 53.87 o
 -2 -17 11 251.76 207.98 62.73 o
 -1 -17 11 21.74 66.14 58.64 o
 0 -17 11 47.04 -17.05 61.37 o
 1 -17 11 22.37 -51.82 62.05 o
 2 -17 11 31.49 73.64 73.64 o
 -5 -16 11 5.43 50.46 55.92 o
 -4 -16 11 20.86 -52.51 52.51 o
 -3 -16 11 674.30 668.19 91.37 o
 -2 -16 11 61.84 147.29 61.37 o
 -1 -16 11 205.80 197.07 68.87 o
 0 -16 11 76.16 118.65 64.10 o
 1 -16 11 77.92 -40.91 65.46 o
 2 -16 11 13.49 56.60 72.28 o
 -5 -15 11 176.78 204.57 66.14 o
 -4 -15 11 9.16 -52.51 52.51 o
 -3 -15 11 111.04 21.82 55.92 o
 -2 -15 11 128.08 257.76 68.87 o
 -1 -15 11 13.78 -49.78 49.78 o
 0 -15 11 51.34 -2.05 58.64 o
 1 -15 11 123.08 199.79 75.01 o
 2 -15 11 159.31 233.89 79.10 o
 -6 -14 11 21.79 45.69 60.01 o
 -5 -14 11 226.02 300.03 69.55 o
 -4 -14 11 158.55 90.01 61.37 o
 -3 -14 11 24.27 -47.73 47.73 o
 -2 -14 11 38.58 -50.46 50.46 o
 -1 -14 11 795.75 793.65 99.56 o
 0 -14 11 293.85 351.11 77.74 o
 1 -14 11 12.90 130.92 62.05 o
 2 -14 11 36.56 133.65 75.69 o
 -6 -13 11 727.30 796.38 97.51 o
 -5 -13 11 17.84 19.77 54.55 o
 -4 -13 11 48.41 -5.46 52.51 o
 -3 -13 11 44.97 6.14 53.19 o
 -2 -13 11 46.31 41.60 55.23 o
 -1 -13 11 355.36 428.84 79.10 o
 0 -13 11 185.02 71.60 60.01 o
 1 -13 11 136.25 160.93 67.51 o
 2 -13 11 167.62 357.93 84.55 o
 3 -13 11 43.97 55.23 77.05 o
 -6 -12 11 84.69 113.19 61.37 o
 -5 -12 11 130.89 242.75 68.87 o
 -4 -12 11 332.05 318.44 75.01 o
 -3 -12 11 49.32 83.19 55.92 o
 -2 -12 11 661.09 899.35 99.56 o
 -1 -12 11 139.62 227.07 65.46 o
 0 -12 11 37.55 73.64 60.69 o
 1 -12 11 58.88 150.02 64.10 o
 2 -12 11 31.33 108.42 69.55 o
 3 -12 11 51.48 34.78 70.23 o
 -7 -11 11 164.50 257.07 72.96 o
 -6 -11 11 36.53 30.69 56.60 o
 -5 -11 11 33.42 45.69 58.64 o
 -4 -11 11 83.42 72.96 58.64 o
 -3 -11 11 148.62 199.79 60.69 o
 -2 -11 11 109.14 191.61 60.01 o
 -1 -11 11 71.08 51.14 54.55 o
 0 -11 11 818.12 619.09 89.33 o
 1 -11 11 62.23 102.28 59.32 o
 2 -11 11 59.49 -27.28 58.64 o
 3 -11 11 158.30 25.91 70.92 o
 -7 -10 11 25.82 0.68 60.69 o
 -6 -10 11 101.60 139.11 63.42 o
 -5 -10 11 471.58 606.82 93.42 o
 -4 -10 11 32.27 -40.23 48.41 o
 -3 -10 11 3.22 -17.05 49.10 o
 -2 -10 11 145.61 102.28 51.14 o
 -1 -10 11 27.59 71.60 49.10 o
 0 -10 11 62.67 60.01 49.10 o
 1 -10 11 384.70 336.85 71.60 o
 2 -10 11 88.99 140.47 70.92 o
 3 -10 11 10.50 92.06 72.28 o
 -7 -9 11 37.52 171.16 66.14 o
 -6 -9 11 496.29 630.00 92.74 o
 -5 -9 11 27.48 -8.86 53.87 o
 -4 -9 11 60.24 -8.18 49.78 o
 -3 -9 11 588.52 756.83 92.74 o
 -2 -9 11 574.53 621.14 83.87 o
 -1 -9 11 61.42 -7.50 48.41 o
 0 -9 11 81.06 34.09 56.60 o
 1 -9 11 59.64 47.05 59.32 o
 2 -9 11 56.53 55.23 67.51 o
 3 -9 11 45.87 47.05 71.60 o
 -8 -8 11 225.64 177.29 73.64 o
 -7 -8 11 2.11 79.10 62.73 o
 -6 -8 11 51.23 66.83 59.32 o
 -5 -8 11 168.50 144.56 62.05 o
 -4 -8 11 50.54 102.28 58.64 o
 -3 -8 11 552.09 651.82 85.24 o
 -2 -8 11 690.75 710.46 87.28 o
 -1 -8 11 90.39 105.69 48.41 o
 0 -8 11 139.94 147.97 55.23 o
 1 -8 11 179.47 152.06 57.96 o
 2 -8 11 48.19 47.73 61.37 o
 3 -8 11 3.39 18.41 64.78 o
 -8 -7 11 72.81 142.52 68.19 o
 -7 -7 11 84.15 60.01 62.73 o
 -6 -7 11 246.30 171.84 64.10 o
 -5 -7 11 226.82 267.98 70.23 o
 -4 -7 11 180.02 127.51 61.37 o
 -3 -7 11 336.71 280.26 62.73 o
 -2 -7 11 367.60 372.93 66.83 o
 -1 -7 11 457.26 317.76 62.05 o
 0 -7 11 12.75 -47.73 47.73 o
 1 -7 11 66.90 184.11 65.46 o
 2 -7 11 8.19 27.28 62.05 o
 3 -7 11 73.49 60.01 63.42 o
 -8 -6 11 254.91 169.11 70.23 o
 -7 -6 11 91.90 100.24 64.78 o
 -6 -6 11 153.73 145.24 64.10 o
 -5 -6 11 254.37 327.99 70.92 o
 -4 -6 11 25.37 72.28 49.10 o
 -3 -6 11 73.52 87.28 52.51 o
 -2 -6 11 552.51 516.12 72.96 o
 -1 -6 11 210.98 219.57 55.92 o
 0 -6 11 76.52 49.10 53.87 o
 1 -6 11 242.57 292.53 70.23 o
 2 -6 11 86.35 117.97 57.28 o
 3 -6 11 10.52 32.73 68.87 o
 -8 -5 11 28.22 124.79 68.19 o
 -7 -5 11 148.32 91.37 62.73 o
 -6 -5 11 154.08 118.65 64.10 o
 -5 -5 11 141.55 126.15 64.78 o
 -4 -5 11 1280.89 1365.69 123.42 o
 -3 -5 11 458.64 415.20 73.64 o
 -2 -5 11 23.92 25.23 42.96 o
 -1 -5 11 710.59 684.55 83.87 o
 0 -5 11 17.35 -32.05 46.37 o
 1 -5 11 321.31 259.80 62.05 o
 2 -5 11 186.05 133.65 64.78 o
 3 -5 11 258.80 333.45 83.19 o
 -8 -4 11 15.41 37.50 66.14 o
 -7 -4 11 36.34 -23.87 58.64 o
 -6 -4 11 297.47 414.52 81.15 o
 -5 -4 11 94.20 117.91 39.29 o
 -4 -4 11 60.85 143.33 39.32 o
 -3 -4 11 107.05 108.42 53.19 o
 -2 -4 11 2883.50 2707.52 163.65 o
 -1 -4 11 698.40 679.78 81.15 o
 0 -4 11 100.96 110.47 54.55 o
 1 -4 11 104.74 132.29 53.87 o
 2 -4 11 10.82 5.46 57.28 o
 3 -4 11 49.37 45.00 59.32 o
 -8 -3 11 19.35 77.74 67.51 o
 -7 -3 11 388.79 394.07 87.28 o
 -6 -3 11 6.25 19.09 57.28 o
 -5 -3 11 172.37 241.16 43.81 o
 -4 -3 11 32.64 56.43 35.63 o
 -3 -3 11 88.37 45.69 46.37 o
 -2 -3 11 273.65 368.84 66.83 o
 -1 -3 11 197.22 109.78 48.41 o
 0 -3 11 500.71 575.45 75.01 o
 1 -3 11 36.23 74.33 55.23 o
 2 -3 11 146.65 196.39 64.78 o
 3 -3 11 66.18 126.15 61.37 o
 4 -3 11 6.78 92.74 75.01 o
 -8 -2 11 1.77 72.96 64.78 o
 -7 -2 11 40.99 70.92 66.14 o
 -6 -2 11 30.70 61.37 58.64 o
 -5 -2 11 589.00 742.05 80.46 o
 -4 -2 11 205.49 233.35 43.06 o
 -3 -2 11 124.94 138.42 57.28 o
 -2 -2 11 1297.42 1324.78 109.78 o
 -1 -2 11 63.42 119.33 53.19 o
 0 -2 11 56.66 58.64 44.32 o
 1 -2 11 243.79 236.62 62.73 o
 2 -2 11 140.88 169.11 64.78 o
 3 -2 11 20.91 86.60 63.42 o
 4 -2 11 34.63 31.37 66.14 o
 -8 -1 11 134.12 113.88 70.92 o
 -7 -1 11 25.56 98.19 62.73 o
 -6 -1 11 44.09 75.52 40.85 o
 -5 -1 11 252.62 386.98 50.18 o
 -4 -1 11 204.21 213.53 41.87 o
 -3 -1 11 1379.23 1444.53 82.20 o
 -2 -1 11 140.55 188.20 52.51 o
 -1 -1 11 271.43 323.22 61.37 o
 0 -1 11 630.22 649.78 79.78 o
 1 -1 11 66.07 30.00 46.37 o
 2 -1 11 105.96 162.29 62.05 o
 3 -1 11 6.96 75.69 66.14 o
 4 -1 11 9.90 89.26 47.62 o
 -8 0 11 114.67 75.01 68.19 o
 -7 0 11 26.38 175.93 70.92 o
 -6 0 11 33.73 36.37 38.92 o
 -5 0 11 409.81 480.18 56.26 o
 -4 0 11 104.62 115.33 40.16 o
 -3 0 11 9.42 17.11 32.52 o
 -2 0 11 375.99 250.25 57.96 o
 -1 0 11 64.99 145.24 53.19 o
 0 0 11 25.13 0.00 41.60 o
 1 0 11 57.50 71.60 55.23 o
 2 0 11 91.42 49.78 53.19 o
 3 0 11 3.72 -22.57 40.00 o
 4 0 11 144.73 194.75 53.90 o
 -8 1 11 134.12 57.96 70.92 o
 -7 1 11 25.56 -1.63 38.76 o
 -6 1 11 44.09 36.97 37.66 o
 -5 1 11 252.62 255.45 47.25 o
 -4 1 11 204.21 260.44 44.83 o
 -3 1 11 1379.23 1343.44 82.93 o
 -2 1 11 140.55 262.53 61.37 o
 -1 1 11 271.43 342.24 65.46 o
 0 1 11 630.22 465.66 70.23 o
 1 1 11 66.07 62.73 51.82 o
 2 1 11 105.96 83.87 59.32 o
 3 1 11 6.96 -37.79 37.79 o
 4 1 11 9.90 -3.47 44.16 o
 -8 2 11 1.77 31.37 65.46 o
 -7 2 11 40.99 68.59 44.22 o
 -6 2 11 30.70 60.00 38.91 o
 -5 2 11 589.00 561.31 68.19 o
 -4 2 11 205.49 222.43 67.85 o
 -3 2 11 124.94 243.88 44.83 o
 -2 2 11 1297.43 1327.51 111.83 o
 -1 2 11 63.42 4.77 47.73 o
 0 2 11 56.66 53.19 49.10 o
 1 2 11 243.79 241.39 55.92 o
 2 2 11 140.88 121.72 39.06 o
 3 2 11 20.91 -6.58 38.83 o
 4 2 11 34.63 -17.70 44.44 o
 -8 3 11 19.35 -41.60 58.64 o
 -7 3 11 388.79 458.70 60.88 o
 -6 3 11 6.25 -3.97 44.32 o
 -5 3 11 172.37 211.30 47.76 o
 -4 3 11 32.64 71.80 37.60 o
 -3 3 11 88.37 176.49 39.50 o
 -2 3 11 273.65 325.29 47.73 o
 -1 3 11 197.22 208.66 58.64 o
 0 3 11 500.71 527.72 74.33 o
 1 3 11 36.23 86.60 47.05 o
 2 3 11 146.65 60.53 37.37 o
 3 3 11 66.18 36.30 40.91 o
 4 3 11 6.78 52.63 45.78 o
 -8 4 11 15.41 3.64 47.49 o
 -7 4 11 36.34 -21.23 41.36 o
 -6 4 11 297.47 379.43 54.74 o
 -5 4 11 94.20 102.39 41.36 o
 -4 4 11 60.85 98.90 45.00 o
 -3 4 11 107.05 177.76 41.12 o
 -2 4 11 2883.50 2727.48 120.77 o
 -1 4 11 698.39 716.60 87.28 o
 0 4 11 100.96 116.60 49.78 o
 1 4 11 104.74 25.23 51.82 o
 2 4 11 10.82 65.57 37.57 o
 3 4 11 49.36 141.28 71.26 o
 -8 5 11 28.22 9.38 45.25 o
 -7 5 11 148.32 171.31 51.75 o
 -6 5 11 154.08 154.05 78.42 o
 -5 5 11 141.55 153.30 43.63 o
 -4 5 11 1280.89 1332.53 86.79 o
 -3 5 11 458.64 394.37 51.34 o
 -2 5 11 23.92 90.47 38.56 o
 -1 5 11 710.59 709.10 84.55 o
 0 5 11 17.35 30.69 50.46 o
 1 5 11 321.31 423.09 50.46 o
 2 5 11 186.05 151.01 41.12 o
 3 5 11 258.80 223.36 48.63 o
 -8 6 11 254.91 194.94 87.28 o
 -7 6 11 91.90 52.36 47.27 o
 -6 6 11 153.73 104.47 56.26 o
 -5 6 11 254.37 326.79 52.13 o
 -4 6 11 25.37 74.44 40.98 o
 -3 6 11 73.52 132.58 39.67 o
 -2 6 11 552.51 614.60 58.80 o
 -1 6 11 210.98 258.44 63.42 o
 0 6 11 76.52 30.00 48.41 o
 1 6 11 242.57 290.79 42.84 o
 2 6 11 86.35 62.14 39.28 o
 3 6 11 10.52 31.05 40.49 o
 -8 7 11 72.81 108.68 87.62 o
 -7 7 11 84.15 82.87 47.83 o
 -6 7 11 246.30 172.20 82.51 o
 -5 7 11 226.82 173.79 45.47 o
 -4 7 11 180.02 204.29 49.00 o
 -3 7 11 336.71 317.87 48.04 o
 -2 7 11 367.60 457.58 52.60 o
 -1 7 11 457.26 564.54 77.74 o
 0 7 11 12.75 -9.91 31.06 o
 1 7 11 66.90 110.72 49.10 o
 2 7 11 8.19 12.46 39.55 o
 3 7 11 73.49 70.84 41.74 o
 -8 8 11 225.64 206.47 60.22 o
 -7 8 11 2.11 54.88 47.18 o
 -6 8 11 51.23 157.47 91.37 o
 -5 8 11 168.50 161.48 60.01 o
 -4 8 11 50.54 66.67 41.16 o
 -3 8 11 552.09 549.52 59.28 o
 -2 8 11 690.75 628.14 64.04 o
 -1 8 11 90.39 103.51 41.87 o
 0 8 11 139.94 190.40 38.13 o
 1 8 11 179.47 127.10 39.40 o
 2 8 11 48.19 85.54 39.29 o
 3 8 11 3.39 -10.22 38.76 o
 -8 9 11 12.62 49.03 51.59 o
 -7 9 11 37.52 56.38 47.01 o
 -6 9 11 496.29 554.41 67.80 o
 -5 9 11 27.48 87.50 43.87 o
 -4 9 11 60.24 35.92 41.71 o
 -3 9 11 588.52 601.63 80.46 o
 -2 9 11 574.53 527.47 58.82 o
 -1 9 11 61.42 45.76 37.25 o
 0 9 11 81.06 37.39 33.18 o
 1 9 11 59.64 -32.35 33.87 o
 2 9 11 56.53 86.20 39.40 o
 3 9 11 45.87 13.01 42.09 o
 -7 10 11 25.82 79.79 94.44 o
 -6 10 11 101.60 94.92 112.85 o
 -5 10 11 471.58 469.40 63.39 o
 -4 10 11 32.27 35.12 42.91 o
 -3 10 11 3.22 62.51 40.97 o
 -2 10 11 145.61 198.99 46.22 o
 -1 10 11 27.59 93.92 28.73 o
 0 10 11 62.67 125.47 37.04 o
 1 10 11 384.70 384.70 79.07 o
 2 10 11 88.99 56.51 64.10 o
 3 10 11 10.50 30.00 62.05 o
 -7 11 11 164.50 165.37 56.62 o
 -6 11 11 36.53 46.37 48.70 o
 -5 11 11 33.42 24.17 45.56 o
 -4 11 11 83.42 67.00 58.30 o
 -3 11 11 148.62 137.30 46.05 o
 -2 11 11 109.14 126.19 49.44 o
 -1 11 11 71.08 131.94 30.39 o
 0 11 11 818.12 715.32 58.25 o
 1 11 11 62.23 105.64 81.49 o
 2 11 11 59.49 122.04 81.49 o
 3 11 11 158.30 176.61 67.51 o
 -7 12 11 128.43 159.92 57.58 o
 -6 12 11 84.69 37.05 44.73 o
 -5 12 11 130.89 89.56 49.22 o
 -4 12 11 332.05 371.27 55.99 o
 -3 12 11 49.32 29.11 39.22 o
 -2 12 11 661.10 658.85 64.13 o
 -1 12 11 139.62 143.13 34.73 o
 0 12 11 37.55 18.92 33.74 o
 1 12 11 58.88 40.36 37.35 o
 2 12 11 31.33 85.59 58.98 o
 3 12 11 51.48 96.83 68.19 o
 -7 13 11 222.79 334.22 66.27 o
 -6 13 11 727.30 615.90 75.43 o
 -5 13 11 17.84 -26.78 40.87 o
 -4 13 11 48.41 3.03 66.48 o
 -3 13 11 44.97 33.15 37.60 o
 -2 13 11 46.31 88.17 30.27 o
 -1 13 11 355.36 349.76 40.27 o
 0 13 11 185.03 74.15 61.37 o
 1 13 11 136.25 162.07 44.44 o
 2 13 11 167.62 156.84 68.87 o
 3 13 11 43.97 12.27 61.37 o
 -7 14 11 15.24 -41.79 51.83 o
 -6 14 11 21.79 -21.85 78.76 o
 -5 14 11 226.02 215.97 56.10 o
 -4 14 11 158.55 299.33 57.76 o
 -3 14 11 24.27 4.01 40.72 o
 -2 14 11 38.58 39.59 38.58 o
 -1 14 11 795.75 769.85 56.11 o
 0 14 11 293.85 337.53 47.96 o
 1 14 11 12.90 35.46 38.98 o
 2 14 11 36.56 158.88 66.14 o
 -7 15 11 29.71 71.55 54.38 o
 -6 15 11 187.88 211.66 62.33 o
 -5 15 11 176.78 251.13 58.40 o
 -4 15 11 9.16 20.55 42.99 o
 -3 15 11 111.04 115.17 46.99 o
 -2 15 11 128.09 119.38 33.44 o
 -1 15 11 13.78 9.01 29.86 o
 0 15 11 51.34 127.55 40.29 o
 1 15 11 123.08 145.34 43.14 o
 2 15 11 159.31 216.84 69.55 o
 -6 16 11 47.25 55.98 52.87 o
 -5 16 11 5.43 -47.49 47.49 o
 -4 16 11 20.86 -0.99 47.15 o
 -3 16 11 674.30 606.99 74.86 o
 -2 16 11 61.84 39.85 30.59 o
 -1 16 11 205.80 156.64 35.69 o
 0 16 11 76.15 102.05 67.85 o
 1 16 11 77.92 100.24 57.96 o
 2 16 11 13.49 -40.23 62.05 o
 -6 17 11 129.88 95.46 58.82 o
 -5 17 11 5.69 -46.63 61.37 o
 -4 17 11 154.27 276.28 57.85 o
 -3 17 11 21.92 -23.26 31.43 o
 -2 17 11 251.76 185.77 37.31 o
 -1 17 11 21.74 65.07 33.27 o
 0 17 11 47.04 62.71 39.32 o
 1 17 11 22.37 62.05 59.32 o
 2 17 11 31.49 79.10 67.51 o
 -6 18 11 76.60 53.02 92.06 o
 -5 18 11 1.13 10.62 52.11 o
 -4 18 11 26.55 55.13 49.21 o
 -3 18 11 6.58 23.78 32.84 o
 -2 18 11 106.61 122.70 34.81 o
 -1 18 11 39.64 20.52 31.77 o
 0 18 11 40.20 -19.77 49.10 o
 1 18 11 174.48 229.80 69.55 o
 -5 19 11 12.81 34.83 54.60 o
 -4 19 11 375.57 399.37 74.27 o
 -3 19 11 58.36 68.94 38.27 o
 -2 19 11 3.67 42.45 33.25 o
 -1 19 11 146.08 132.38 53.18 o
 0 19 11 72.85 130.76 47.18 o
 1 19 11 132.79 190.93 70.92 o
 -5 20 11 115.95 159.44 59.10 o
 -4 20 11 59.73 58.43 36.89 o
 -3 20 11 36.10 40.85 35.47 o
 -2 20 11 75.89 121.26 36.99 o
 -1 20 11 31.31 46.57 34.47 o
 0 20 11 9.85 -49.81 51.82 o
 1 20 11 111.15 310.26 78.42 o
 -5 21 11 24.43 -30.90 52.72 o
 -4 21 11 94.43 91.44 39.73 o
 -3 21 11 4.91 -32.11 32.11 o
 -2 21 11 16.25 17.62 33.86 o
 -1 21 11 65.58 17.88 43.05 o
 0 21 11 88.75 -45.06 78.08 o
 -4 22 11 59.83 43.79 38.42 o
 -3 22 11 25.20 -35.53 35.53 o
 -2 22 11 17.06 -4.24 35.44 o
 -1 22 11 6.39 65.86 49.44 o
 -3 23 11 146.65 166.93 72.03 o
 -2 23 11 89.56 25.41 75.35 o
 -3 -20 12 6.41 51.82 64.10 o
 -2 -20 12 8.22 -12.96 63.42 o
 -1 -20 12 76.03 51.14 70.23 o
 -4 -19 12 71.42 -36.82 62.05 o
 -3 -19 12 163.86 52.51 63.42 o
 -2 -19 12 71.33 186.16 73.64 o
 -1 -19 12 7.11 25.23 63.42 o
 -4 -18 12 55.34 -58.64 58.64 o
 -3 -18 12 29.96 2.73 64.10 o
 -2 -18 12 54.16 -3.41 61.37 o
 -1 -18 12 135.54 152.74 72.28 o
 0 -18 12 58.12 150.02 75.69 o
 -5 -17 12 55.85 111.15 67.51 o
 -4 -17 12 12.46 -20.46 60.01 o
 -3 -17 12 213.25 132.97 66.14 o
 -2 -17 12 48.28 79.10 66.83 o
 -1 -17 12 3.44 -53.87 53.87 o
 0 -17 12 78.38 158.88 72.28 o
 -5 -16 12 19.29 114.56 64.78 o
 -4 -16 12 55.04 17.05 64.10 o
 -3 -16 12 163.04 114.56 69.55 o
 -2 -16 12 170.17 96.15 63.42 o
 -1 -16 12 95.26 38.87 64.78 o
 0 -16 12 55.78 82.51 71.60 o
 1 -16 12 8.66 4.09 62.05 o
 -5 -15 12 142.14 107.74 64.78 o
 -4 -15 12 156.05 94.78 68.19 o
 -3 -15 12 42.13 -57.28 57.28 o
 -2 -15 12 6.53 60.69 59.32 o
 -1 -15 12 41.65 158.20 64.78 o
 0 -15 12 102.58 62.05 68.19 o
 1 -15 12 59.88 143.88 78.42 o
 -6 -14 12 63.33 240.71 75.69 o
 -5 -14 12 184.43 165.70 68.87 o
 -4 -14 12 191.56 143.88 72.28 o
 -3 -14 12 14.01 22.50 57.28 o
 -2 -14 12 452.48 554.31 88.65 o
 -1 -14 12 204.63 154.11 64.78 o
 0 -14 12 8.71 -48.41 58.64 o
 1 -14 12 1.56 -19.09 65.46 o
 -6 -13 12 62.00 85.24 67.51 o
 -5 -13 12 214.15 197.75 71.60 o
 -4 -13 12 68.47 62.73 64.10 o
 -3 -13 12 45.30 75.01 57.96 o
 -2 -13 12 389.20 390.66 84.55 o
 -1 -13 12 30.53 -34.78 54.55 o
 0 -13 12 75.96 103.65 62.73 o
 1 -13 12 21.96 29.32 60.69 o
 -6 -12 12 22.09 47.05 64.10 o
 -5 -12 12 31.47 55.23 63.42 o
 -4 -12 12 185.50 186.16 70.23 o
 -3 -12 12 43.40 10.23 56.60 o
 -2 -12 12 158.12 188.20 69.55 o
 -1 -12 12 29.42 52.51 55.23 o
 0 -12 12 44.81 51.82 58.64 o
 1 -12 12 20.57 -40.91 55.92 o
 2 -12 12 49.50 174.56 79.10 o
 -7 -11 12 9.45 -60.01 60.01 o
 -6 -11 12 44.47 12.27 62.73 o
 -5 -11 12 135.15 174.56 70.23 o
 -4 -11 12 1.11 98.19 65.46 o
 -3 -11 12 67.06 52.51 60.01 o
 -2 -11 12 537.93 484.76 81.15 o
 -1 -11 12 64.03 -6.14 49.10 o
 0 -11 12 59.24 11.59 57.96 o
 1 -11 12 68.26 1.36 57.96 o
 2 -11 12 1.24 -61.37 61.37 o
 -7 -10 12 16.11 62.05 64.78 o
 -6 -10 12 35.22 15.00 63.42 o
 -5 -10 12 119.53 96.83 65.46 o
 -4 -10 12 320.63 302.76 79.10 o
 -3 -10 12 51.39 34.09 59.32 o
 -2 -10 12 291.99 237.30 64.78 o
 -1 -10 12 123.95 165.02 64.78 o
 0 -10 12 144.03 189.57 69.55 o
 1 -10 12 42.05 -11.59 62.73 o
 2 -10 12 38.80 -36.82 64.78 o
 -7 -9 12 25.38 128.88 67.51 o
 -6 -9 12 84.04 154.11 71.60 o
 -5 -9 12 106.23 59.32 63.42 o
 -4 -9 12 139.48 154.79 64.78 o
 -3 -9 12 215.45 244.80 64.10 o
 -2 -9 12 77.30 72.96 57.96 o
 -1 -9 12 80.54 68.19 58.64 o
 0 -9 12 111.35 47.05 62.05 o
 1 -9 12 37.87 8.86 66.83 o
 2 -9 12 9.55 -49.78 55.23 o
 -7 -8 12 187.77 225.71 74.33 o
 -6 -8 12 221.77 237.30 79.78 o
 -5 -8 12 97.60 52.51 63.42 o
 -4 -8 12 41.06 182.75 70.23 o
 -3 -8 12 68.65 18.41 60.01 o
 -2 -8 12 17.99 21.14 49.78 o
 -1 -8 12 265.72 184.11 59.32 o
 0 -8 12 68.43 1.36 50.46 o
 1 -8 12 24.65 -12.96 59.32 o
 2 -8 12 58.42 -35.46 66.14 o
 -7 -7 12 7.27 47.05 63.42 o
 -6 -7 12 37.64 -3.41 64.78 o
 -5 -7 12 195.95 222.30 79.78 o
 -4 -7 12 132.47 94.78 62.73 o
 -3 -7 12 123.67 143.20 57.28 o
 -2 -7 12 149.75 83.19 60.01 o
 -1 -7 12 117.79 223.66 64.78 o
 0 -7 12 162.53 197.75 66.83 o
 1 -7 12 21.63 -23.18 59.32 o
 2 -7 12 20.21 -23.18 59.32 o
 -7 -6 12 167.63 124.10 68.87 o
 -6 -6 12 41.76 90.69 70.23 o
 -5 -6 12 101.02 116.60 66.14 o
 -4 -6 12 98.64 93.42 64.10 o
 -3 -6 12 74.38 47.73 59.32 o
 -2 -6 12 82.35 70.92 53.87 o
 -1 -6 12 874.74 818.88 98.19 o
 0 -6 12 15.18 -24.55 51.14 o
 1 -6 12 113.41 66.14 57.28 o
 2 -6 12 77.63 57.28 70.23 o
 -7 -5 12 65.53 95.46 68.19 o
 -6 -5 12 94.40 95.46 66.83 o
 -5 -5 12 355.89 341.56 81.83 o
 -4 -5 12 132.44 129.56 59.32 o
 -3 -5 12 73.69 111.83 62.73 o
 -2 -5 12 16.88 38.87 48.41 o
 -1 -5 12 247.88 203.89 65.46 o
 0 -5 12 202.00 217.52 60.69 o
 1 -5 12 91.31 164.34 66.14 o
 2 -5 12 4.44 -52.51 52.51 o
 -7 -4 12 74.23 71.60 70.23 o
 -6 -4 12 127.94 62.73 70.23 o
 -5 -4 12 26.90 48.41 56.60 o
 -4 -4 12 50.25 -50.46 55.23 o
 -3 -4 12 97.42 212.75 70.23 o
 -2 -4 12 7.36 -33.41 43.64 o
 -1 -4 12 386.07 184.79 66.14 o
 0 -4 12 40.86 57.28 49.78 o
 1 -4 12 7.39 17.05 55.92 o
 2 -4 12 10.06 27.28 60.69 o
 3 -4 12 15.96 32.05 67.51 o
 -7 -3 12 78.24 78.42 69.55 o
 -6 -3 12 494.77 499.76 89.33 o
 -5 -3 12 49.45 42.14 75.01 o
 -4 -3 12 54.41 45.69 58.64 o
 -3 -3 12 190.75 220.93 67.51 o
 -2 -3 12 146.39 79.10 57.28 o
 -1 -3 12 898.36 761.61 93.42 o
 0 -3 12 23.57 77.05 49.10 o
 1 -3 12 382.45 314.35 73.64 o
 2 -3 12 86.75 68.19 64.78 o
 3 -3 12 11.65 10.23 68.19 o
 -8 -2 12 219.52 225.02 84.55 o
 -7 -2 12 234.40 293.90 87.28 o
 -6 -2 12 129.18 100.24 71.60 o
 -5 -2 12 52.17 83.84 43.09 o
 -4 -2 12 108.85 148.67 44.44 o
 -3 -2 12 10.35 54.55 57.28 o
 -2 -2 12 264.64 237.98 67.51 o
 -1 -2 12 270.75 276.17 67.51 o
 0 -2 12 20.72 -15.00 49.78 o
 1 -2 12 96.67 96.83 60.01 o
 2 -2 12 62.43 26.59 56.60 o
 3 -2 12 46.97 103.65 73.64 o
 -8 -1 12 123.30 150.02 83.19 o
 -7 -1 12 385.01 330.04 85.92 o
 -6 -1 12 72.63 70.23 60.01 o
 -5 -1 12 17.09 -37.64 37.64 o
 -4 -1 12 22.70 50.80 39.21 o
 -3 -1 12 66.82 68.19 56.60 o
 -2 -1 12 221.11 210.02 64.10 o
 -1 -1 12 63.99 77.74 51.82 o
 0 -1 12 98.51 65.46 57.28 o
 1 -1 12 17.51 26.59 49.10 o
 2 -1 12 19.19 51.82 57.28 o
 3 -1 12 47.26 37.50 66.83 o
 -8 0 12 8.80 31.37 73.64 o
 -7 0 12 171.83 246.85 82.51 o
 -6 0 12 126.69 97.60 45.54 o
 -5 0 12 31.23 -10.44 39.11 o
 -4 0 12 200.53 197.34 44.81 o
 -3 0 12 7.58 -11.59 47.05 o
 -2 0 12 188.30 222.30 62.05 o
 -1 0 12 254.65 181.38 61.37 o
 0 0 12 2.94 -42.28 42.28 o
 1 0 12 2.72 -50.46 51.82 o
 2 0 12 362.56 340.88 79.10 o
 3 0 12 40.13 60.69 64.10 o
 -8 1 12 123.30 86.60 76.37 o
 -7 1 12 385.02 308.90 87.96 o
 -6 1 12 72.63 83.07 46.69 o
 -5 1 12 17.09 38.33 40.85 o
 -4 1 12 22.70 23.14 38.28 o
 -3 1 12 66.82 81.24 41.69 o
 -2 1 12 221.12 158.20 62.73 o
 -1 1 12 63.99 -17.05 47.73 o
 0 1 12 98.51 180.02 61.37 o
 1 1 12 17.51 -15.00 49.78 o
 2 1 12 19.19 52.51 59.32 o
 3 1 12 47.26 124.10 74.33 o
 -8 2 12 219.52 216.84 83.19 o
 -7 2 12 234.40 199.79 81.15 o
 -6 2 12 129.18 141.55 59.32 o
 -5 2 12 52.17 12.56 41.05 o
 -4 2 12 108.85 129.08 45.14 o
 -3 2 12 10.35 31.77 37.04 o
 -2 2 12 264.64 373.61 75.01 o
 -1 2 12 270.75 175.93 62.05 o
 0 2 12 20.72 47.73 55.23 o
 1 2 12 96.67 60.01 60.01 o
 2 2 12 62.43 112.51 64.78 o
 3 2 12 46.97 57.28 62.73 o
 -7 3 12 78.24 147.72 48.24 o
 -6 3 12 494.77 478.67 61.85 o
 -5 3 12 49.45 7.83 59.32 o
 -4 3 12 54.41 -5.28 45.35 o
 -3 3 12 190.75 208.68 47.71 o
 -2 3 12 146.39 117.97 54.55 o
 -1 3 12 898.36 777.97 92.74 o
 0 3 12 23.57 69.55 50.46 o
 1 3 12 382.45 453.39 81.15 o
 2 3 12 86.75 92.74 61.37 o
 3 3 12 11.65 66.83 65.46 o
 -7 4 12 74.23 100.65 49.89 o
 -6 4 12 127.94 79.37 46.28 o
 -5 4 12 26.90 16.50 42.52 o
 -4 4 12 50.25 25.44 41.94 o
 -3 4 12 97.42 95.45 40.49 o
 -2 4 12 7.36 -8.18 50.46 o
 -1 4 12 386.07 246.85 67.51 o
 0 4 12 40.86 -26.59 43.64 o
 1 4 12 7.39 123.42 63.42 o
 2 4 12 10.06 -6.82 56.60 o
 3 4 12 15.96 113.88 66.83 o
 -7 5 12 65.53 41.84 71.26 o
 -6 5 12 94.40 63.22 46.26 o
 -5 5 12 355.89 278.35 52.31 o
 -4 5 12 132.44 85.39 43.59 o
 -3 5 12 73.69 44.95 39.03 o
 -2 5 12 16.88 28.12 49.10 o
 -1 5 12 247.88 297.99 70.23 o
 0 5 12 202.00 167.75 57.96 o
 1 5 12 91.31 111.15 60.69 o
 2 5 12 4.44 14.32 56.60 o
 -7 6 12 167.63 73.04 48.21 o
 -6 6 12 41.76 100.32 48.54 o
 -5 6 12 101.01 35.02 44.35 o
 -4 6 12 98.64 164.00 81.15 o
 -3 6 12 74.38 102.96 44.60 o
 -2 6 12 82.35 50.32 40.91 o
 -1 6 12 874.74 745.92 96.83 o
 0 6 12 15.18 -11.59 51.82 o
 1 6 12 113.41 141.83 63.42 o
 2 6 12 77.63 81.83 64.10 o
 -7 7 12 7.27 -39.20 75.69 o
 -6 7 12 37.64 49.17 47.67 o
 -5 7 12 195.95 243.91 54.24 o
 -4 7 12 132.47 91.42 43.06 o
 -3 7 12 123.67 55.94 44.77 o
 -2 7 12 149.75 109.26 54.55 o
 -1 7 12 117.79 122.74 59.32 o
 0 7 12 162.53 145.24 64.78 o
 1 7 12 21.63 -15.00 51.14 o
 2 7 12 20.21 47.73 60.01 o
 -7 8 12 187.77 182.36 53.42 o
 -6 8 12 221.77 288.69 58.32 o
 -5 8 12 97.60 17.65 46.05 o
 -4 8 12 41.06 11.59 43.32 o
 -3 8 12 68.65 120.26 46.89 o
 -2 8 12 17.98 51.61 37.12 o
 -1 8 12 265.72 297.31 67.51 o
 0 8 12 68.43 49.78 53.19 o
 1 8 12 24.65 -37.50 50.46 o
 2 8 12 58.42 20.46 60.01 o
 -7 9 12 25.38 50.87 48.37 o
 -6 9 12 84.04 9.46 46.97 o
 -5 9 12 106.23 65.82 47.73 o
 -4 9 12 139.48 132.61 46.92 o
 -3 9 12 215.45 134.98 56.26 o
 -2 9 12 77.30 -3.42 40.74 o
 -1 9 12 80.54 158.88 64.78 o
 0 9 12 111.35 116.60 61.37 o
 1 9 12 37.87 -0.68 53.87 o
 2 9 12 9.55 73.64 60.69 o
 -7 10 12 16.11 -14.72 48.37 o
 -6 10 12 35.22 -1.46 48.44 o
 -5 10 12 119.53 4.23 97.17 o
 -4 10 12 320.63 377.85 73.27 o
 -3 10 12 51.39 82.42 67.17 o
 -2 10 12 291.99 339.68 56.41 o
 -1 10 12 123.95 137.06 59.32 o
 0 10 12 144.03 165.02 64.78 o
 1 10 12 42.05 104.33 63.42 o
 2 10 12 38.80 42.28 58.64 o
 -7 11 12 9.45 1.44 49.34 o
 -6 11 12 44.47 29.31 76.71 o
 -5 11 12 135.15 108.20 47.13 o
 -4 11 12 1.11 -41.04 42.51 o
 -3 11 12 67.06 60.64 41.11 o
 -2 11 12 537.93 412.13 54.71 o
 -1 11 12 64.03 82.51 60.69 o
 0 11 12 59.24 -25.91 57.28 o
 1 11 12 68.26 84.55 63.42 o
 2 11 12 1.24 -13.14 42.19 o
 -6 12 12 22.09 68.98 51.55 o
 -5 12 12 31.47 -23.97 49.10 o
 -4 12 12 185.50 271.23 56.11 o
 -3 12 12 43.40 60.20 48.69 o
 -2 12 12 158.12 95.79 48.67 o
 -1 12 12 29.42 34.00 99.22 o
 0 12 12 44.81 56.60 55.92 o
 1 12 12 20.57 199.79 68.87 o
 2 12 12 49.50 113.88 66.83 o
 -6 13 12 62.00 57.38 54.48 o
 -5 13 12 214.15 129.24 54.65 o
 -4 13 12 68.47 55.10 56.26 o
 -3 13 12 45.30 75.38 62.05 o
 -2 13 12 389.20 472.15 62.52 o
 -1 13 12 30.53 -40.09 40.09 o
 0 13 12 75.96 57.28 60.01 o
 1 13 12 21.96 46.37 42.43 o
 -6 14 12 63.33 131.43 61.37 o
 -5 14 12 184.43 148.17 92.40 o
 -4 14 12 191.56 227.58 58.10 o
 -3 14 12 14.01 35.36 44.35 o
 -2 14 12 452.48 415.37 61.93 o
 -1 14 12 204.63 159.01 47.76 o
 0 14 12 8.71 2.05 56.60 o
 1 14 12 1.56 63.73 42.30 o
 -6 15 12 229.28 120.69 60.75 o
 -5 15 12 142.14 238.40 59.67 o
 -4 15 12 156.05 135.55 72.28 o
 -3 15 12 42.13 11.59 47.27 o
 -2 15 12 6.53 34.82 46.86 o
 -1 15 12 41.65 33.57 46.99 o
 0 15 12 102.58 45.69 61.37 o
 1 15 12 59.88 -49.10 52.51 o
 -5 16 12 19.29 31.86 52.45 o
 -4 16 12 55.04 61.18 50.46 o
 -3 16 12 163.04 80.57 48.41 o
 -2 16 12 170.17 201.06 54.71 o
 -1 16 12 95.26 86.48 45.13 o
 0 16 12 55.78 62.41 85.58 o
 1 16 12 8.66 34.78 57.96 o
 -5 17 12 55.85 61.50 56.17 o
 -4 17 12 12.46 -14.83 47.62 o
 -3 17 12 213.25 224.62 57.81 o
 -2 17 12 48.28 15.98 46.99 o
 -1 17 12 3.44 108.75 50.58 o
 0 17 12 78.38 34.09 51.14 o
 -5 18 12 8.04 -33.02 53.20 o
 -4 18 12 55.34 138.59 57.12 o
 -3 18 12 29.96 -9.60 46.97 o
 -2 18 12 54.16 13.23 47.86 o
 -1 18 12 135.54 152.04 111.49 o
 0 18 12 58.12 36.82 57.96 o
 -4 19 12 71.42 120.52 57.61 o
 -3 19 12 163.86 95.21 53.54 o
 -2 19 12 71.33 28.16 48.49 o
 -1 19 12 7.11 0.63 34.46 o
 -3 20 12 6.41 74.36 52.07 o
 -2 20 12 8.22 105.38 54.34 o
 -1 20 12 76.03 76.68 46.61 o
 -3 -17 13 1.89 -20.46 66.83 o
 -2 -17 13 10.75 -9.55 62.73 o
 -4 -16 13 252.73 222.30 81.83 o
 -3 -16 13 13.48 -52.51 62.05 o
 -2 -16 13 48.18 -2.73 66.14 o
 -1 -16 13 7.80 -4.77 57.96 o
 -5 -15 13 7.48 -48.41 65.46 o
 -4 -15 13 43.37 14.32 69.55 o
 -3 -15 13 44.34 89.33 69.55 o
 -2 -15 13 21.59 38.87 68.87 o
 -1 -15 13 9.82 -5.46 66.14 o
 -5 -14 13 74.83 84.55 72.96 o
 -4 -14 13 37.44 38.19 66.83 o
 -3 -14 13 139.06 88.65 70.92 o
 -2 -14 13 140.05 181.38 70.23 o
 -1 -14 13 57.29 54.55 68.19 o
 0 -14 13 14.27 109.78 73.64 o
 -5 -13 13 59.17 93.42 70.23 o
 -4 -13 13 49.29 4.77 61.37 o
 -3 -13 13 53.09 160.93 70.92 o
 -2 -13 13 124.13 87.28 64.78 o
 -1 -13 13 31.93 -40.91 62.05 o
 0 -13 13 12.37 99.56 71.60 o
 -6 -12 13 189.02 89.33 72.96 o
 -5 -12 13 20.64 45.69 69.55 o
 -4 -12 13 83.84 127.51 70.92 o
 -3 -12 13 157.90 48.41 64.10 o
 -2 -12 13 85.38 134.33 66.14 o
 -1 -12 13 105.37 85.92 64.78 o
 0 -12 13 5.63 -3.41 64.10 o
 -6 -11 13 38.35 34.78 70.92 o
 -5 -11 13 22.01 88.65 66.83 o
 -4 -11 13 46.86 61.37 64.78 o
 -3 -11 13 2.49 16.37 63.42 o
 -2 -11 13 12.80 47.73 57.28 o
 -1 -11 13 269.85 222.98 74.33 o
 0 -11 13 31.68 -52.51 63.42 o
 -6 -10 13 65.73 123.42 73.64 o
 -5 -10 13 30.67 76.37 68.19 o
 -4 -10 13 2.20 6.14 61.37 o
 -3 -10 13 166.08 13.64 67.51 o
 -2 -10 13 13.61 45.00 60.69 o
 -1 -10 13 50.93 23.18 60.69 o
 0 -10 13 7.92 18.41 66.14 o
 1 -10 13 66.47 8.86 62.05 o
 -6 -9 13 31.20 113.19 71.60 o
 -5 -9 13 31.29 -57.28 63.42 o
 -4 -9 13 148.23 175.25 74.33 o
 -3 -9 13 245.16 276.85 79.78 o
 -2 -9 13 521.75 795.02 102.97 o
 -1 -9 13 200.34 62.73 65.46 o
 0 -9 13 6.20 -59.32 59.32 o
 1 -9 13 17.48 92.74 71.60 o
 -6 -8 13 109.52 235.93 77.05 o
 -5 -8 13 71.27 9.55 67.51 o
 -4 -8 13 82.93 96.83 70.92 o
 -3 -8 13 32.17 27.28 58.64 o
 -2 -8 13 524.72 627.95 92.06 o
 -1 -8 13 165.36 117.29 65.46 o
 0 -8 13 135.63 208.66 66.14 o
 1 -8 13 14.17 53.87 70.92 o
 -6 -7 13 12.14 62.73 70.92 o
 -5 -7 13 155.09 190.25 83.19 o
 -4 -7 13 44.99 -36.14 56.60 o
 -3 -7 13 231.17 227.75 79.10 o
 -2 -7 13 119.74 233.21 70.92 o
 -1 -7 13 78.39 98.87 68.19 o
 0 -7 13 37.57 32.05 62.05 o
 1 -7 13 33.59 -21.14 55.23 o
 -7 -6 13 24.59 180.02 81.83 o
 -6 -6 13 18.12 59.32 74.33 o
 -5 -6 13 32.33 73.64 71.60 o
 -4 -6 13 60.77 25.23 68.19 o
 -3 -6 13 43.51 -8.86 57.28 o
 -2 -6 13 85.90 90.69 56.60 o
 -1 -6 13 55.53 41.60 64.78 o
 0 -6 13 557.28 454.75 80.46 o
 1 -6 13 19.89 102.97 70.23 o
 -7 -5 13 5.06 -7.50 70.92 o
 -6 -5 13 8.94 0.00 72.96 o
 -5 -5 13 199.63 182.07 75.01 o
 -4 -5 13 87.35 17.05 58.64 o
 -3 -5 13 64.53 5.46 62.05 o
 -2 -5 13 210.05 219.57 72.28 o
 -1 -5 13 111.55 105.69 57.28 o
 0 -5 13 85.35 63.42 57.28 o
 1 -5 13 78.14 72.28 68.19 o
 -7 -4 13 74.94 65.46 76.37 o
 -6 -4 13 119.01 203.89 75.01 o
 -5 -4 13 47.27 -52.51 64.78 o
 -4 -4 13 27.65 76.37 68.19 o
 -3 -4 13 581.25 632.73 97.51 o
 -2 -4 13 10.33 14.32 57.96 o
 -1 -4 13 37.89 -15.68 55.92 o
 0 -4 13 79.67 96.83 64.10 o
 1 -4 13 17.30 -35.46 51.14 o
 -7 -3 13 82.95 74.33 70.92 o
 -6 -3 13 81.14 36.14 72.28 o
 -5 -3 13 171.38 141.83 72.96 o
 -4 -3 13 84.62 113.88 73.64 o
 -3 -3 13 18.99 14.32 62.73 o
 -2 -3 13 147.19 107.74 65.46 o
 -1 -3 13 81.89 90.69 62.05 o
 0 -3 13 0.12 -16.37 55.23 o
 1 -3 13 85.12 94.10 63.42 o
 -7 -2 13 25.01 103.65 76.37 o
 -6 -2 13 26.97 4.09 68.19 o
 -5 -2 13 96.90 152.06 73.64 o
 -4 -2 13 219.27 338.90 81.15 o
 -3 -2 13 100.73 140.47 68.87 o
 -2 -2 13 6.93 85.24 62.73 o
 -1 -2 13 59.08 -51.82 51.82 o
 0 -2 13 426.26 422.02 83.87 o
 1 -2 13 188.53 57.28 61.37 o
 2 -2 13 22.73 -54.55 64.78 o
 -7 -1 13 14.10 -34.78 70.23 o
 -6 -1 13 69.78 21.14 72.96 o
 -5 -1 13 169.15 143.88 49.70 o
 -4 -1 13 33.81 -5.46 61.37 o
 -3 -1 13 6.59 -56.60 56.60 o
 -2 -1 13 721.24 823.66 104.33 o
 -1 -1 13 238.14 123.42 57.96 o
 0 -1 13 131.88 135.01 65.46 o
 1 -1 13 55.43 21.82 54.55 o
 2 -1 13 6.54 35.46 66.83 o
 -7 0 13 57.02 123.42 78.42 o
 -6 0 13 2.10 72.28 69.55 o
 -5 0 13 8.41 54.99 47.94 o
 -4 0 13 124.49 99.34 48.83 o
 -3 0 13 105.31 97.51 68.19 o
 -2 0 13 135.68 100.24 59.32 o
 -1 0 13 46.28 84.55 60.01 o
 0 0 13 0.99 -23.18 54.55 o
 1 0 13 50.22 -5.46 61.37 o
 2 0 13 17.91 15.68 60.69 o
 -7 1 13 14.10 133.65 85.92 o
 -6 1 13 69.78 77.96 49.51 o
 -5 1 13 169.15 172.74 52.07 o
 -4 1 13 33.81 18.60 43.73 o
 -3 1 13 6.59 -23.87 51.82 o
 -2 1 13 721.24 529.76 92.74 o
 -1 1 13 238.14 210.70 68.19 o
 0 1 13 131.88 286.39 75.01 o
 1 1 13 55.43 -16.37 60.69 o
 2 1 13 6.54 -57.96 57.96 o
 -7 2 13 25.01 148.65 83.87 o
 -6 2 13 26.97 58.43 48.66 o
 -5 2 13 96.90 115.33 49.89 o
 -4 2 13 219.27 203.91 52.07 o
 -3 2 13 100.73 52.51 64.10 o
 -2 2 13 6.93 34.09 59.32 o
 -1 2 13 59.08 -13.64 48.41 o
 0 2 13 426.26 415.89 80.46 o
 1 2 13 188.53 225.02 72.28 o
 2 2 13 22.73 87.28 66.83 o
 -7 3 13 82.95 45.00 78.42 o
 -6 3 13 81.14 75.42 76.37 o
 -5 3 13 171.38 103.83 49.64 o
 -4 3 13 84.62 53.26 45.56 o
 -3 3 13 18.99 0.20 44.12 o
 -2 3 13 147.19 161.61 62.73 o
 -1 3 13 81.89 114.56 64.78 o
 0 3 13 0.12 -23.87 57.96 o
 1 3 13 85.12 12.96 64.78 o
 -7 4 13 74.94 139.64 54.05 o
 -6 4 13 119.01 -1.24 90.35 o
 -5 4 13 47.27 66.57 55.23 o
 -4 4 13 27.65 37.19 60.01 o
 -3 4 13 581.25 472.47 120.01 o
 -2 4 13 10.33 27.96 57.96 o
 -1 4 13 37.89 30.69 61.37 o
 0 4 13 79.67 -12.96 55.23 o
 1 4 13 17.30 15.00 62.73 o
 -7 5 13 5.06 18.52 50.00 o
 -6 5 13 8.94 35.02 47.67 o
 -5 5 13 199.63 181.02 53.42 o
 -4 5 13 87.35 -42.24 66.48 o
 -3 5 13 64.53 42.79 45.52 o
 -2 5 13 210.05 238.66 74.33 o
 -1 5 13 111.55 200.48 71.60 o
 0 5 13 85.35 125.47 58.64 o
 1 5 13 78.14 80.46 62.73 o
 -7 6 13 24.59 30.17 51.28 o
 -6 6 13 18.12 5.40 48.64 o
 -5 6 13 32.33 136.82 75.01 o
 -4 6 13 60.77 60.61 45.13 o
 -3 6 13 43.51 52.92 47.13 o
 -2 6 13 85.90 42.96 63.42 o
 -1 6 13 55.53 94.10 64.78 o
 0 6 13 557.28 406.34 81.15 o
 1 6 13 19.89 51.82 60.69 o
 -6 7 13 12.14 44.45 51.27 o
 -5 7 13 155.09 162.27 53.89 o
 -4 7 13 44.99 22.64 46.52 o
 -3 7 13 231.17 214.97 50.73 o
 -2 7 13 119.74 93.42 66.83 o
 -1 7 13 78.39 38.19 61.37 o
 0 7 13 37.57 -17.73 60.69 o
 1 7 13 33.59 82.51 63.42 o
 -6 8 13 109.52 83.46 53.88 o
 -5 8 13 71.27 141.64 53.27 o
 -4 8 13 82.93 125.12 59.67 o
 -3 8 13 32.17 22.86 44.85 o
 -2 8 13 524.72 535.90 90.69 o
 -1 8 13 165.36 242.75 75.01 o
 0 8 13 135.63 149.33 68.87 o
 1 8 13 14.17 66.83 67.51 o
 -6 9 13 31.20 -6.41 110.47 o
 -5 9 13 31.29 57.15 50.19 o
 -4 9 13 148.23 84.81 50.52 o
 -3 9 13 245.16 236.00 80.12 o
 -2 9 13 521.75 525.92 67.23 o
 -1 9 13 200.34 132.29 70.92 o
 0 9 13 6.20 -38.19 60.01 o
 1 9 13 17.48 -7.50 60.01 o
 -6 10 13 65.73 69.52 50.19 o
 -5 10 13 30.67 20.45 48.73 o
 -4 10 13 2.20 76.72 50.73 o
 -3 10 13 166.08 84.21 51.11 o
 -2 10 13 13.61 60.98 50.14 o
 -1 10 13 50.93 175.93 69.55 o
 0 10 13 7.92 -5.46 61.37 o
 1 10 13 66.47 89.33 67.51 o
 -6 11 13 38.35 146.09 59.21 o
 -5 11 13 22.01 8.03 50.12 o
 -4 11 13 46.86 40.56 50.25 o
 -3 11 13 2.49 54.79 47.55 o
 -2 11 13 12.80 -30.63 60.69 o
 -1 11 13 269.85 137.74 69.55 o
 0 11 13 31.68 126.83 67.51 o
 -6 12 13 189.02 123.37 60.18 o
 -5 12 13 20.64 86.99 51.34 o
 -4 12 13 83.84 77.31 54.55 o
 -3 12 13 157.90 137.68 53.97 o
 -2 12 13 85.38 55.94 85.92 o
 -1 12 13 105.37 25.91 67.51 o
 0 12 13 5.63 95.46 66.14 o
 -5 13 13 59.17 59.89 55.44 o
 -4 13 13 49.29 38.17 50.66 o
 -3 13 13 53.09 39.77 50.18 o
 -2 13 13 124.13 157.90 54.72 o
 -1 13 13 31.93 -60.01 60.01 o
 0 13 13 12.37 -8.86 63.42 o
 -5 14 13 74.83 46.63 56.39 o
 -4 14 13 37.44 50.42 50.39 o
 -3 14 13 139.06 136.00 55.56 o
 -2 14 13 140.05 130.98 53.24 o
 -1 14 13 57.29 40.91 66.83 o
 0 14 13 14.27 -61.37 61.37 o
 -5 15 13 7.48 -93.76 93.76 o
 -4 15 13 43.37 16.74 51.35 o
 -3 15 13 44.34 -6.02 50.83 o
 -2 15 13 21.59 70.79 79.78 o
 -1 15 13 9.82 -25.91 62.73 o
 -4 16 13 252.73 276.31 65.53 o
 -3 16 13 13.48 58.47 49.22 o
 -2 16 13 48.18 44.09 49.41 o
 -1 16 13 7.80 12.27 68.19 o
 -3 17 13 1.89 55.39 49.81 o
 -2 17 13 10.75 71.94 47.73 o
 -4 -12 14 98.79 17.05 70.23 o
 -3 -12 14 4.50 101.60 77.05 o
 -2 -12 14 53.64 154.11 74.33 o
 -4 -11 14 158.39 12.27 68.19 o
 -3 -11 14 5.35 45.69 72.28 o
 -2 -11 14 63.29 79.78 72.28 o
 -5 -10 14 56.84 -12.27 71.60 o
 -4 -10 14 85.73 23.87 70.92 o
 -3 -10 14 30.37 -40.23 70.92 o
 -2 -10 14 106.30 246.16 79.10 o
 -1 -10 14 36.79 34.09 72.96 o
 -5 -9 14 39.45 -49.10 70.92 o
 -4 -9 14 209.66 282.30 83.19 o
 -3 -9 14 57.86 91.37 73.64 o
 -2 -9 14 83.12 80.46 72.28 o
 -1 -9 14 259.11 248.21 73.64 o
 -5 -8 14 127.05 111.15 79.78 o
 -4 -8 14 105.48 20.46 75.69 o
 -3 -8 14 12.48 -15.00 61.37 o
 -2 -8 14 71.74 25.91 59.32 o
 -1 -8 14 28.79 -19.77 66.14 o
 -5 -7 14 270.72 177.97 83.19 o
 -4 -7 14 188.77 175.25 81.83 o
 -3 -7 14 33.97 -4.77 70.92 o
 -2 -7 14 17.47 16.37 66.14 o
 -1 -7 14 29.77 -3.41 66.83 o
 0 -7 14 71.38 95.46 70.92 o
 -5 -6 14 37.79 28.64 75.01 o
 -4 -6 14 39.12 15.68 70.23 o
 -3 -6 14 3.39 -27.96 60.69 o
 -2 -6 14 174.22 182.75 69.55 o
 -1 -6 14 25.54 21.14 58.64 o
 0 -6 14 28.35 33.41 66.83 o
 -6 -5 14 165.34 233.21 86.60 o
 -5 -5 14 14.18 -13.64 77.05 o
 -4 -5 14 71.73 -43.64 72.96 o
 -3 -5 14 3.54 -17.73 71.60 o
 -2 -5 14 78.83 19.77 66.14 o
 -1 -5 14 33.17 114.56 70.23 o
 0 -5 14 63.93 141.15 73.64 o
 -6 -4 14 16.02 -49.78 77.74 o
 -5 -4 14 73.69 72.28 72.28 o
 -4 -4 14 67.47 85.92 73.64 o
 -3 -4 14 99.35 83.19 70.92 o
 -2 -4 14 23.72 119.33 68.19 o
 -1 -4 14 9.09 -60.69 60.69 o
 0 -4 14 22.70 -8.18 66.83 o
 -6 -3 14 24.57 104.33 82.51 o
 -5 -3 14 9.36 47.05 77.05 o
 -4 -3 14 12.92 6.82 66.83 o
 -3 -3 14 227.44 180.70 72.96 o
 -2 -3 14 32.34 45.69 59.32 o
 -1 -3 14 44.92 -57.96 57.96 o
 0 -3 14 55.41 20.46 59.32 o
 -6 -2 14 22.55 17.73 74.33 o
 -5 -2 14 170.62 158.20 73.64 o
 -4 -2 14 33.79 -49.78 68.87 o
 -3 -2 14 28.35 64.78 66.14 o
 -2 -2 14 122.49 53.87 63.42 o
 -1 -2 14 13.31 41.60 64.10 o
 0 -2 14 59.03 107.06 69.55 o
 -6 -1 14 201.67 91.37 84.55 o
 -5 -1 14 2.99 -8.86 70.23 o
 -4 -1 14 14.31 -35.46 68.19 o
 -3 -1 14 61.58 122.06 75.69 o
 -2 -1 14 21.47 47.73 64.10 o
 -1 -1 14 155.80 38.87 63.42 o
 0 -1 14 45.65 39.55 65.46 o
 -6 0 14 337.69 321.85 94.10 o
 -5 0 14 22.50 9.11 49.77 o
 -4 0 14 145.85 175.93 84.55 o
 -3 0 14 1.28 54.55 68.87 o
 -2 0 14 11.54 -44.32 54.55 o
 -1 0 14 191.61 182.75 74.33 o
 0 0 14 10.38 38.87 63.42 o
 -6 1 14 201.67 91.37 75.69 o
 -5 1 14 2.99 100.08 51.72 o
 -4 1 14 14.31 83.87 79.10 o
 -3 1 14 61.58 93.42 70.23 o
 -2 1 14 21.47 -34.78 62.05 o
 -1 1 14 155.80 149.33 71.60 o
 0 1 14 45.65 25.91 62.05 o
 -6 2 14 22.55 -30.00 79.10 o
 -5 2 14 170.62 172.04 65.46 o
 -4 2 14 33.79 17.20 83.87 o
 -3 2 14 28.35 27.28 60.01 o
 -2 2 14 122.49 66.14 70.92 o
 -1 2 14 13.31 3.41 60.01 o
 0 2 14 59.03 -1.36 66.14 o
 -6 3 14 24.57 70.71 53.40 o
 -5 3 14 9.36 -35.78 47.55 o
 -4 3 14 12.92 -51.82 67.85 o
 -3 3 14 227.44 210.02 79.78 o
 -2 3 14 32.34 33.41 64.10 o
 -1 3 14 44.92 51.82 70.23 o
 0 3 14 55.41 36.82 61.37 o
 -6 4 14 16.02 84.79 60.69 o
 -5 4 14 73.69 87.18 51.93 o
 -4 4 14 67.47 92.72 52.72 o
 -3 4 14 99.35 165.02 79.10 o
 -2 4 14 23.72 27.96 67.51 o
 -1 4 14 9.09 -25.23 60.01 o
 0 4 14 22.70 25.91 64.78 o
 -6 5 14 165.35 227.42 60.70 o
 -5 5 14 14.18 17.39 51.65 o
 -4 5 14 71.73 50.28 47.96 o
 -3 5 14 3.54 -19.09 57.96 o
 -2 5 14 78.83 111.15 68.19 o
 -1 5 14 33.17 77.74 71.60 o
 0 5 14 63.93 -58.64 58.64 o
 -5 6 14 37.79 24.76 51.75 o
 -4 6 14 39.12 58.03 51.75 o
 -3 6 14 3.39 11.24 49.17 o
 -2 6 14 174.22 66.83 71.60 o
 -1 6 14 25.54 -30.00 61.37 o
 0 6 14 28.35 85.92 64.78 o
 -5 7 14 270.72 313.86 63.34 o
 -4 7 14 188.77 176.37 56.65 o
 -3 7 14 33.97 12.97 46.38 o
 -2 7 14 17.47 47.73 65.46 o
 -1 7 14 29.78 110.47 64.10 o
 0 7 14 71.38 46.37 67.51 o
 -5 8 14 127.05 161.61 56.90 o
 -4 8 14 105.48 84.00 66.48 o
 -3 8 14 12.48 32.69 50.87 o
 -2 8 14 71.74 66.14 61.37 o
 -1 8 14 28.79 45.00 62.73 o
 -5 9 14 39.45 27.95 93.42 o
 -4 9 14 209.66 169.13 58.61 o
 -3 9 14 57.86 44.41 67.85 o
 -2 9 14 83.12 21.82 66.83 o
 -1 9 14 259.11 164.34 71.60 o
 -5 10 14 56.84 27.04 51.42 o
 -4 10 14 85.73 111.44 58.03 o
 -3 10 14 30.37 35.57 58.30 o
 -2 10 14 106.30 23.87 68.87 o
 -1 10 14 36.79 24.55 64.78 o
 -4 11 14 158.39 104.96 56.94 o
 -3 11 14 5.35 52.31 54.81 o
 -2 11 14 63.29 -32.05 64.78 o
 -4 12 14 98.79 178.45 58.77 o
 -3 12 14 4.50 -8.29 48.37 o
 -2 12 14 53.64 -5.46 70.23 o
 -3 -4 15 110.82 -28.64 66.83 o
 -3 -3 15 7.27 -57.28 66.83 o
 -4 -2 15 15.10 -4.09 75.01 o
 -3 -2 15 39.73 9.55 75.01 o
 -4 -1 15 0.68 -64.78 64.78 o
 -3 -1 15 255.87 328.67 94.10 o
 -2 -1 15 5.08 22.50 73.64 o
 -4 0 15 5.07 80.46 78.42 o
 -3 0 15 0.81 122.06 77.05 o
 -2 0 15 20.45 62.05 75.69 o
 -4 1 15 0.68 -73.64 73.64 o
 -3 1 15 255.87 165.70 83.87 o
 -2 1 15 5.08 -15.68 70.92 o
 -4 2 15 15.10 -10.23 74.33 o
 -3 2 15 39.73 46.37 76.37 o
 -3 3 15 7.27 36.14 76.37 o
 -3 4 15 110.82 -61.37 71.60 o
